# Supplementary material for: Meta-analysis of activated neurons reveals dynamic regulation of diverse classes of alternative splicing
Source: HighWire-hosted journal article supplement (doi:10.1101/gr.280082.124), 2025-04-24
Supplement: supplemental_figures.revision3.pdf [file supplemental_figures.revision3.pdf]

A

| Publication                               | Type        | DIV | Strain  | Silencing      | Timepoints      |
|-------------------------------------------|-------------|-----|---------|----------------|-----------------|
| Calderon, et al. eLife (2022)             | Cortical    | 10  | CD-1    | O/N D-AP5/TTX  | 1hr, 6hr        |
| Ibarra, et al. Mol Sys Bio (2022)         | Cortical    | 7   | CD-1    | 2hr AP5/TTX    | 1hr, 6hr, 10hr  |
| Maze, et al. Neuron (2015)                | Cortical    | 8   | C57BL/6 | 1hr D-AP5/TTX  | 30min, 2hr, 5hr |
| Xu, et al. Biology (2022)                 | Cortical    | 7   | C57BL/6 | O/N DL-AP5/TTX | 2hr, 6hr        |
| Quesnel-Vallieres, et al. Mol Cell (2016) | Hippocampal | 10  | C57BL/6 | No silencing   | 30min, 3hr      |

B

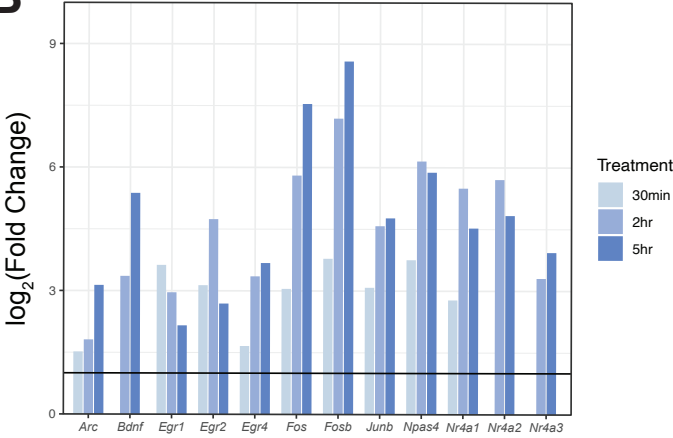

C

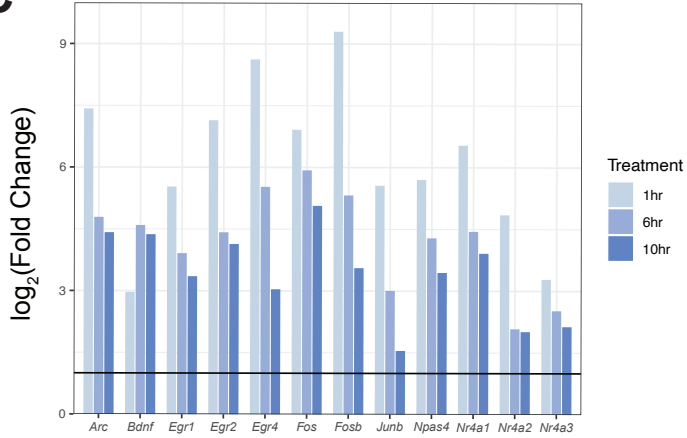

D

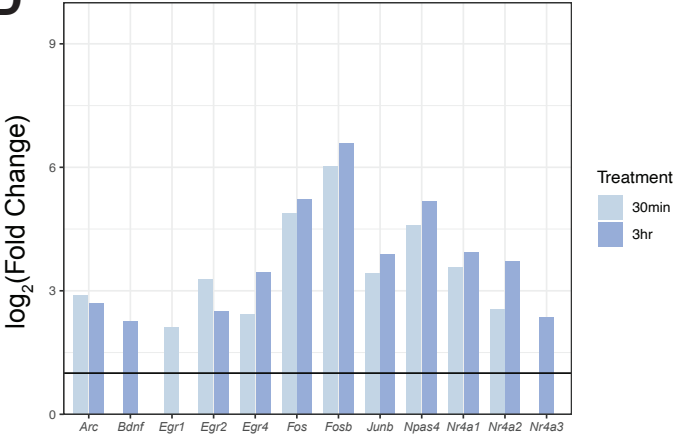

E

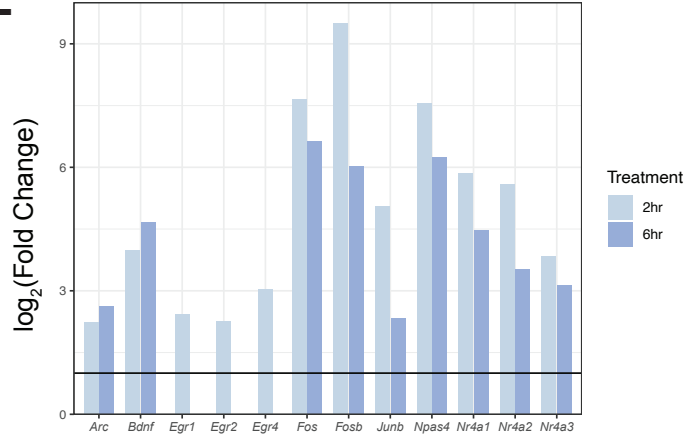

F

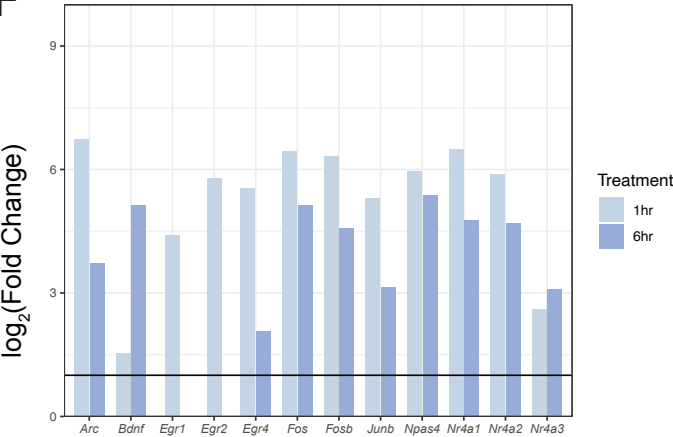

**Supplemental Figure 1. Immediate early gene expression is triggered after KCl treatment in all datasets.** (A) Table denoting the experimental parameters used to generate each dataset. (B-E) Log<sub>2</sub> fold change in expression of immediate early genes between KCl and control samples across all datasets included in the analysis; (B) Maze et al. 2015, (C) Ibarra et al. 2022, (D) Quesnel-Vallieres et al. 2016, (E) Xu et al. 2022, (F) Calderon et al. 2022. Dashed line denotes no change in expression ( $\log_2FC = 1$ ).

**A**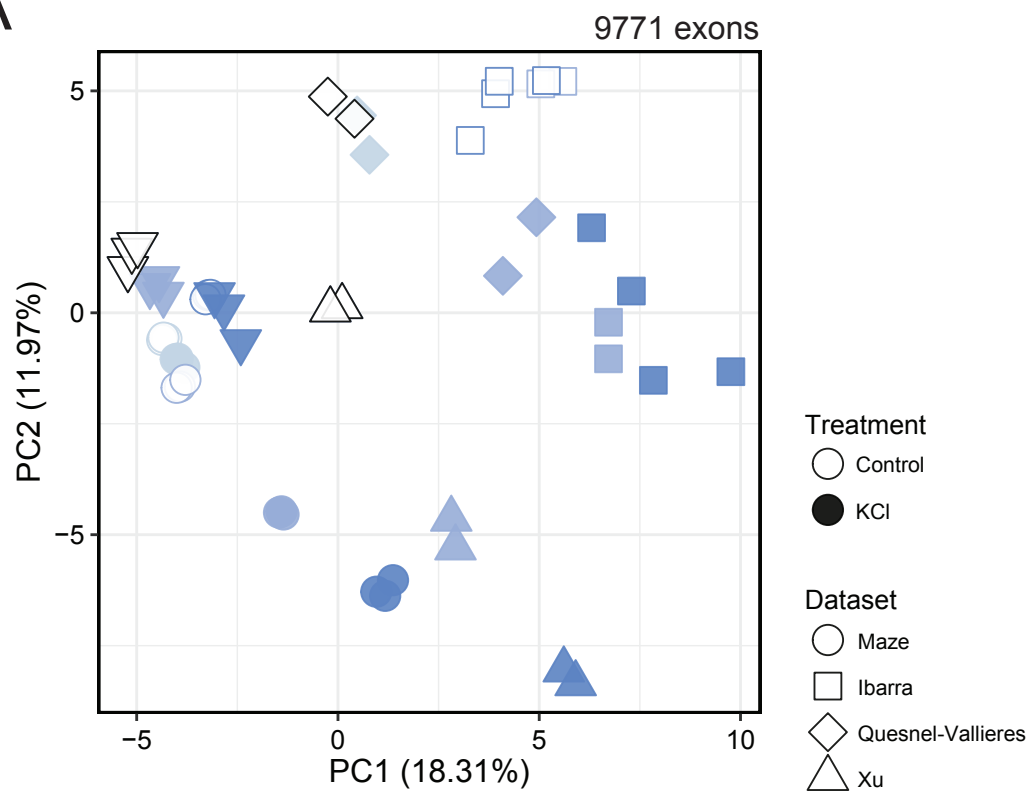**B**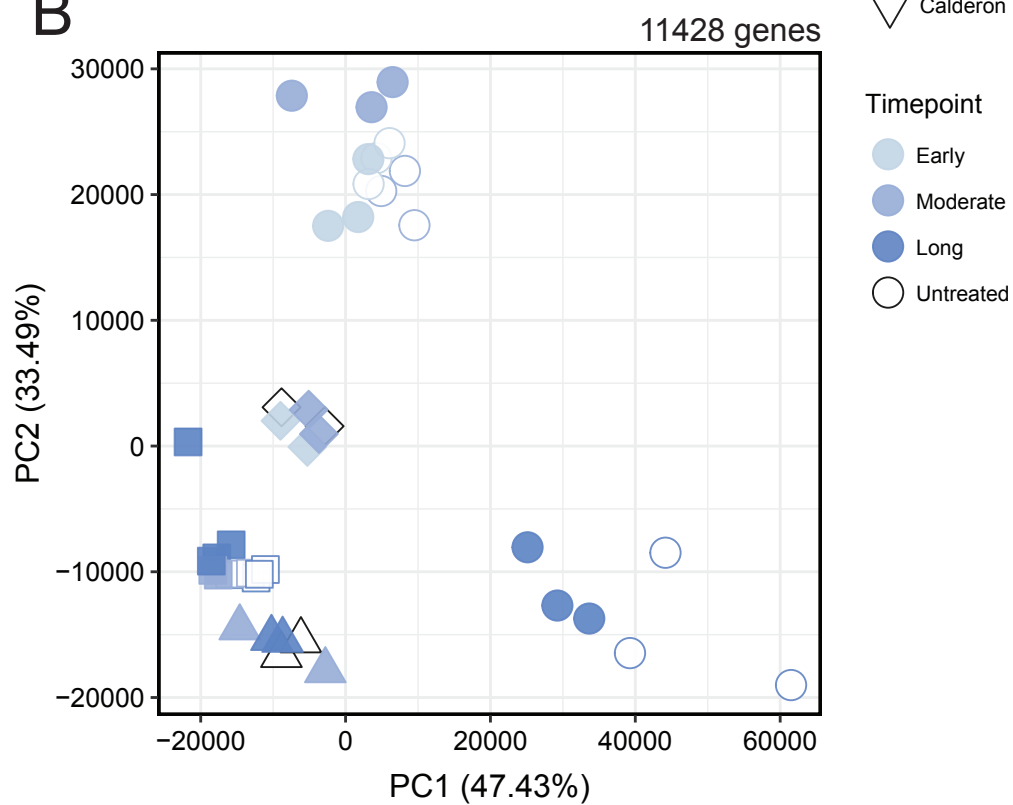

**Supplemental Figure 2. KCl-stimulated samples across different datasets converge at the level of alternative splicing.** (A) PCA of inclusion of 9,771 exons quantified in all datasets used in this work plotted within the same PCA space. Fill denotes KCl status, fill color represents time after stimulation, and shape denotes dataset of origin. Percent of variance each principal component represents is shown on each axis. (B) PCA of expression of 11,428 genes quantified in all datasets used in this work plotted within the same PCA space. Fill denotes KCl status, fill color represents time after stimulation, and shape denotes dataset of origin. Percent of variance each principal component represents is shown on each axis.

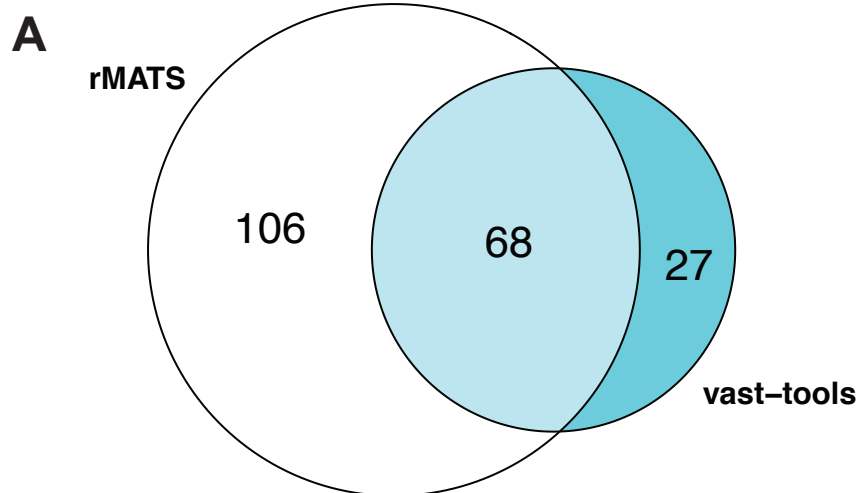

**B**

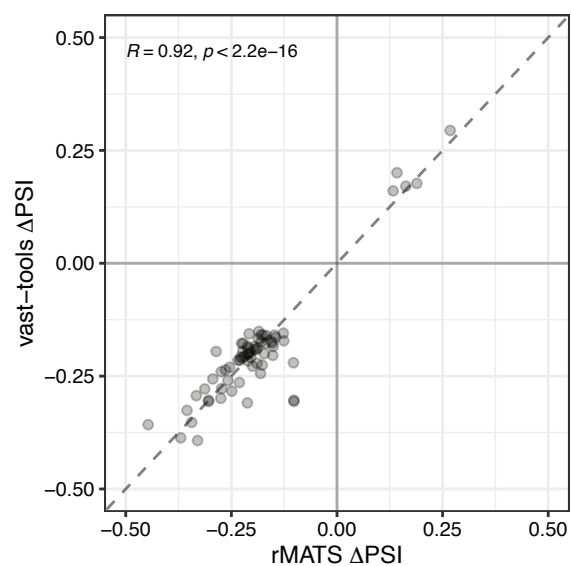

**C**

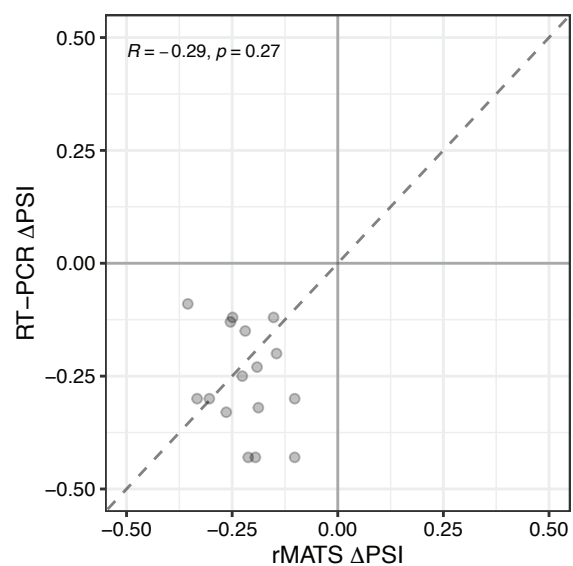

**Supplemental Figure 3. KCl-dependent microexons are identified by rMATS.** (A) Euler plot showing the overlap of differentially spliced microexons (<28nt) after 3h of KCl treatment called by vast-tools in Quesnel-Vallieres et al. and rMATS in this study. (B) Scatterplot of microexon  $\Delta$ PSIs called by vast-tools and rMATS. Correlation was calculated using Pearson's R. (C) Scatterplot of  $\Delta$ PSIs for KCl-dependent microexons called by rMATS and validated by reverse transcription PCR (RT-PCR) in Quesnel-Vallieres et al.

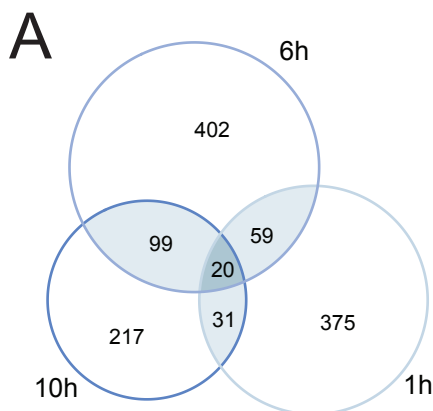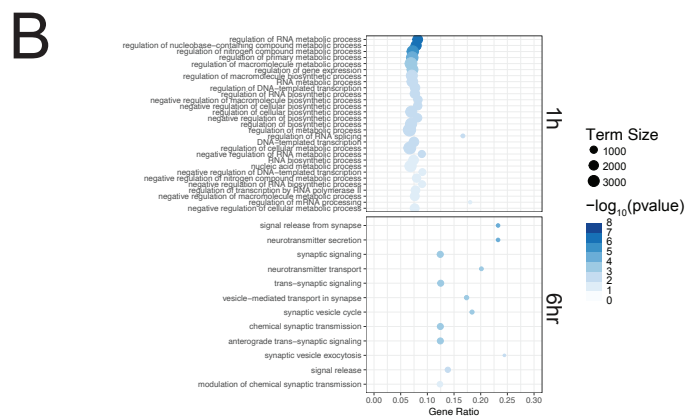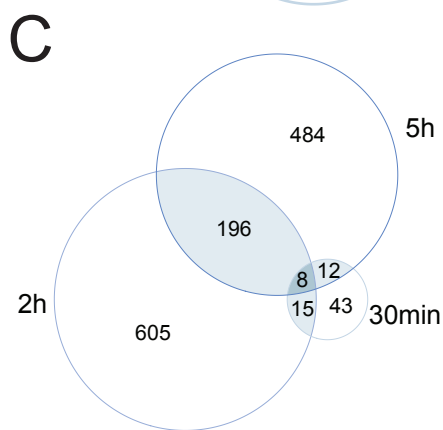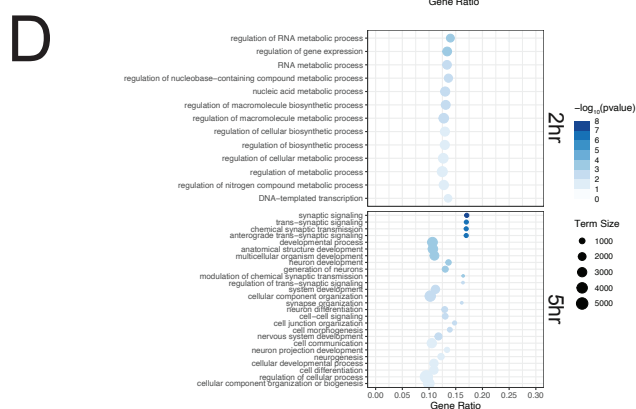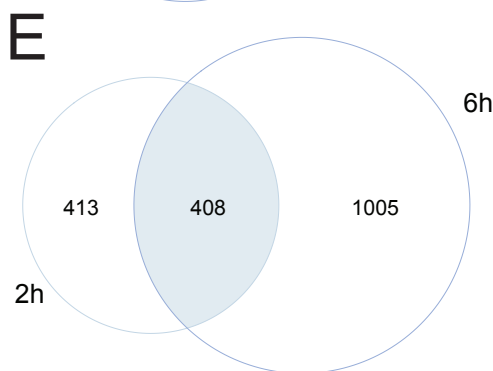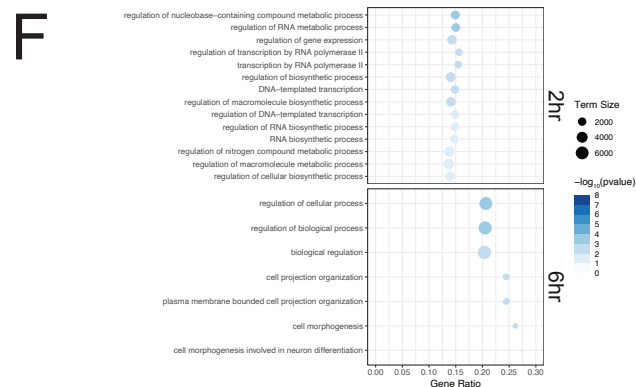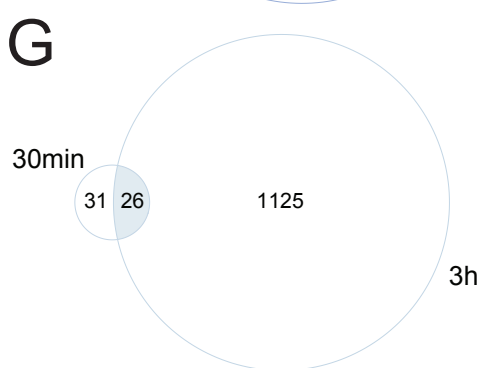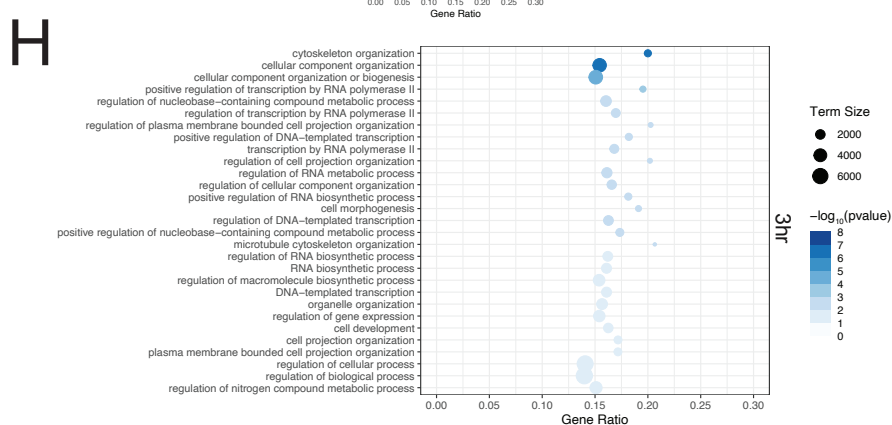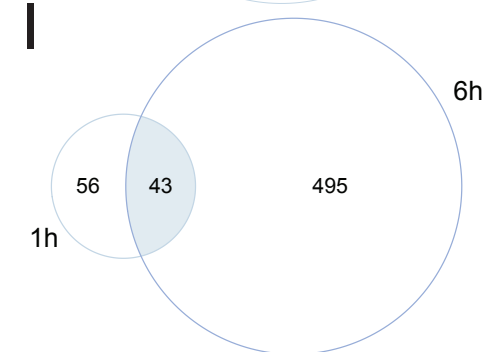

**Supplemental Figure 4. Different lengths of KCl stimulation induce distinct alternative**

**splicing patterns.** (A) Euler plot of differentially spliced exons across KCl timepoints from

Ibarra, et al. (B) Enriched Gene Ontology terms for each KCl timepoint from Ibarra, et al. All

significant terms from the “Biological Process” set are shown. Timepoints which returned no

significantly enriched terms are not shown. (C) Euler plot of differentially spliced exons across

KCl timepoints from Maze, et al. (D) Enriched Gene Ontology terms for each KCl timepoint from

Maze, et al. All significant terms from the “Biological Process” set are shown. Timepoints which

returned no significantly enriched terms are not shown. (E) Euler plot of differentially spliced

exons across KCl timepoints from Xu, et al. (F) Enriched Gene Ontology terms for each KCl

timepoint from Xu, et al. All significant terms from the “Biological Process” set are shown.

Timepoints which returned no significantly enriched terms are not shown. (G) Euler plot of

differentially spliced exons across KCl timepoints from Quesnel-Vallieres, et al. (H) Enriched

Gene Ontology terms for each KCl timepoint from Quesnel-Vallieres, et al. All significant terms

from the “Biological Process” set are shown. Timepoints which returned no significantly enriched

terms are not shown. (I) Euler plot of differentially spliced exons across KCl timepoints from

Calderon, et al. Note, no enriched Gene Ontology terms were found for either timepoint.



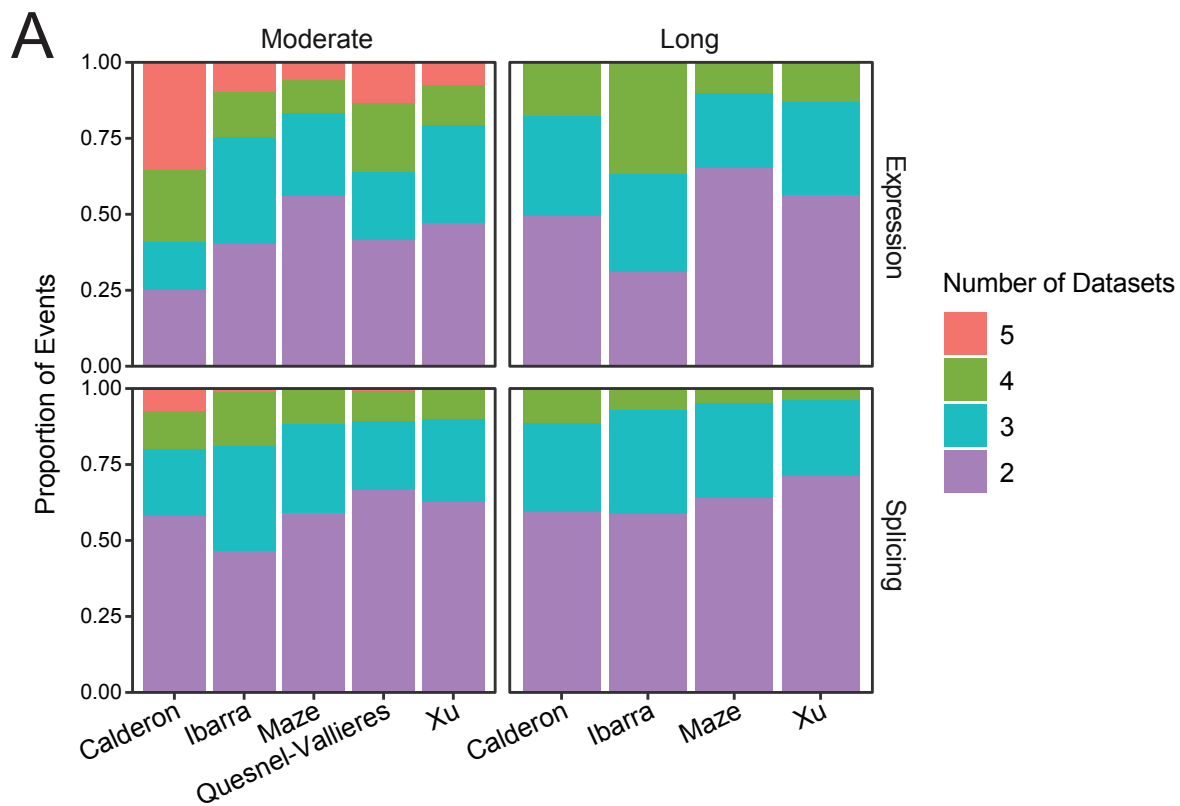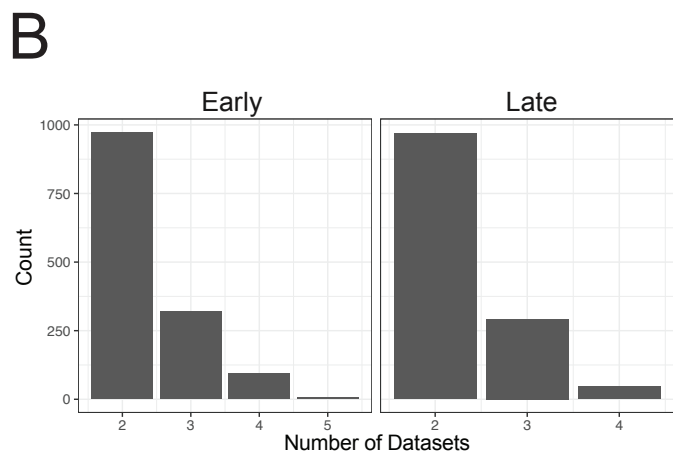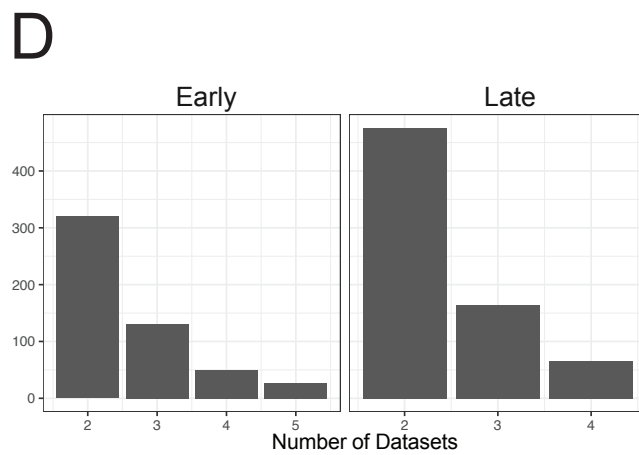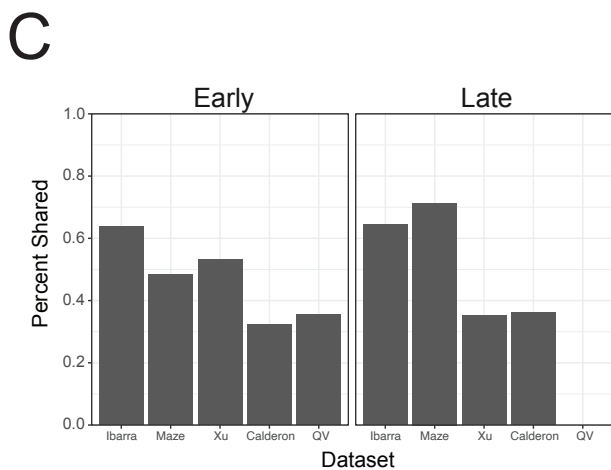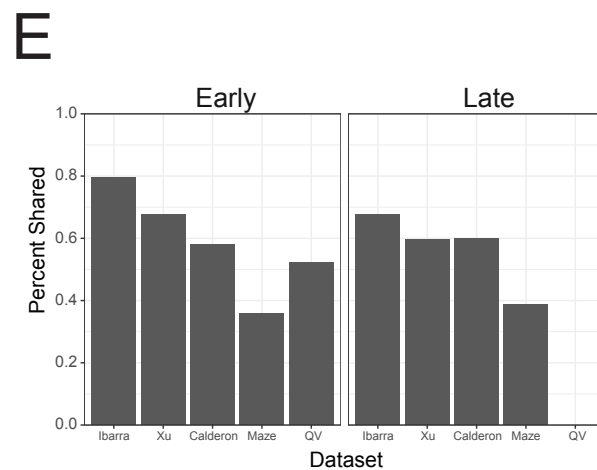

**Supplemental Figure 5. KCI-dependent differentially spliced exons and differentially expressed genes are consistent across datasets.** (A) Number of datasets which share a differential alternative exon or DEG found in each dataset. (B) Number of datasets in which a given high-confidence KCI-dependent exon is found. (C) Proportion of each dataset in which a differential alternative exon is found in another dataset. (D) Number of datasets in which a given high-confidence KCI-dependent DEG is found. (E) Proportion of each dataset in which a DEG is found in another dataset.

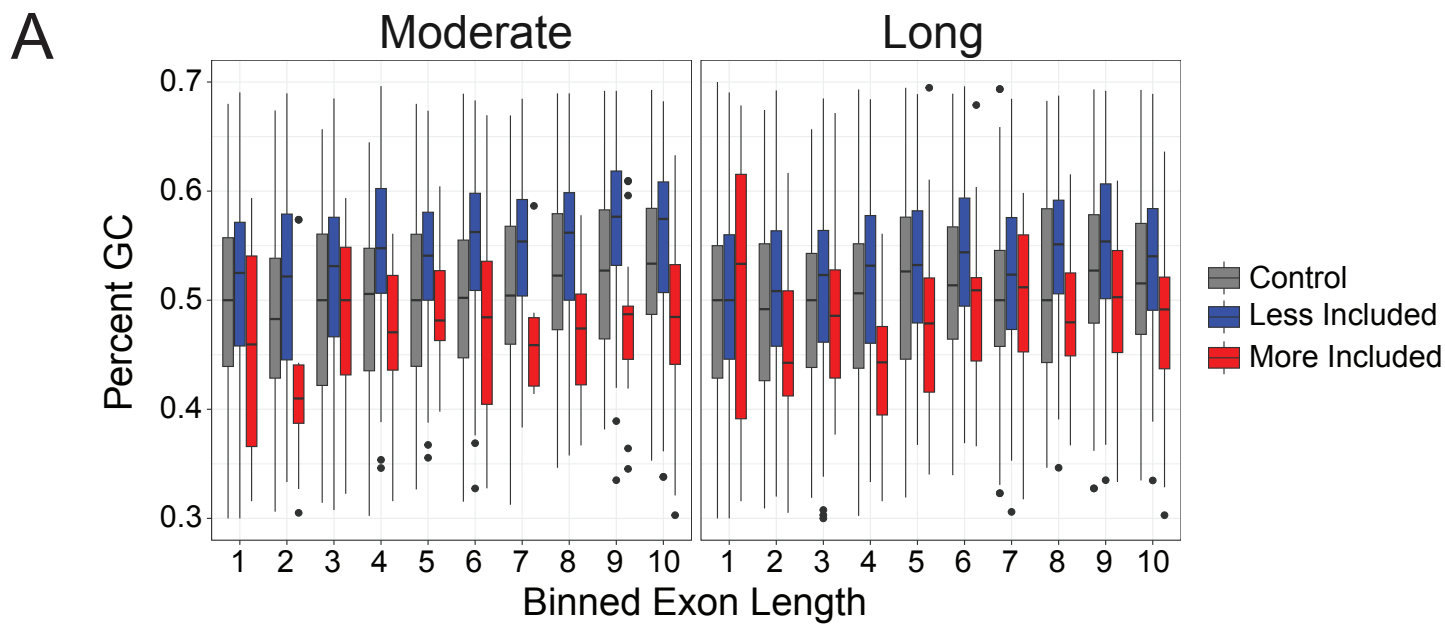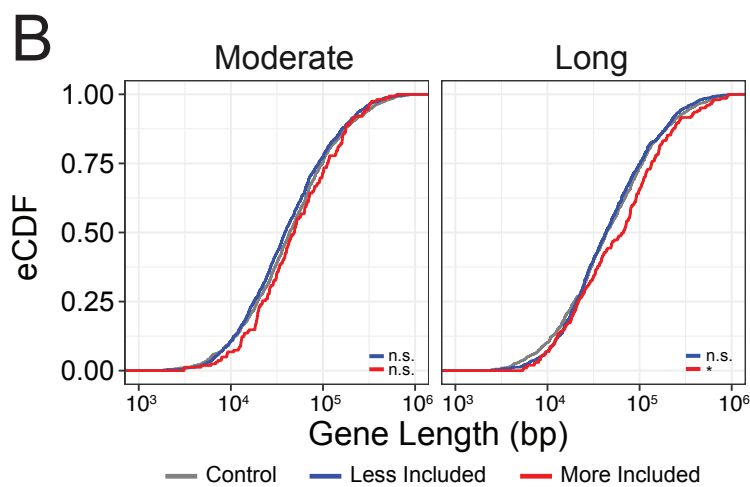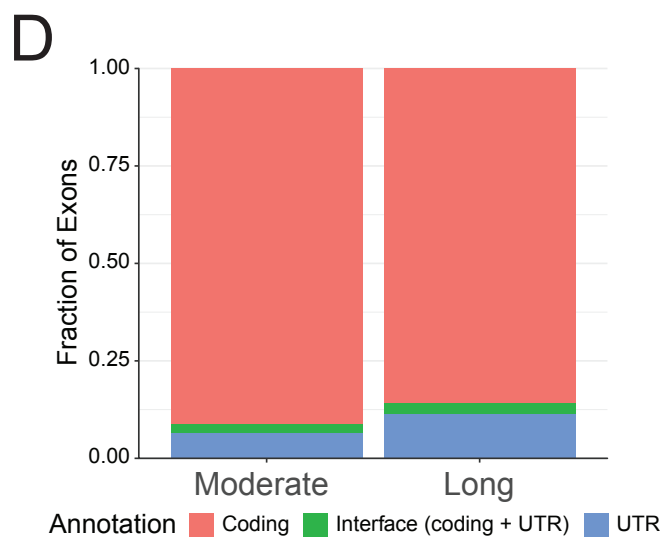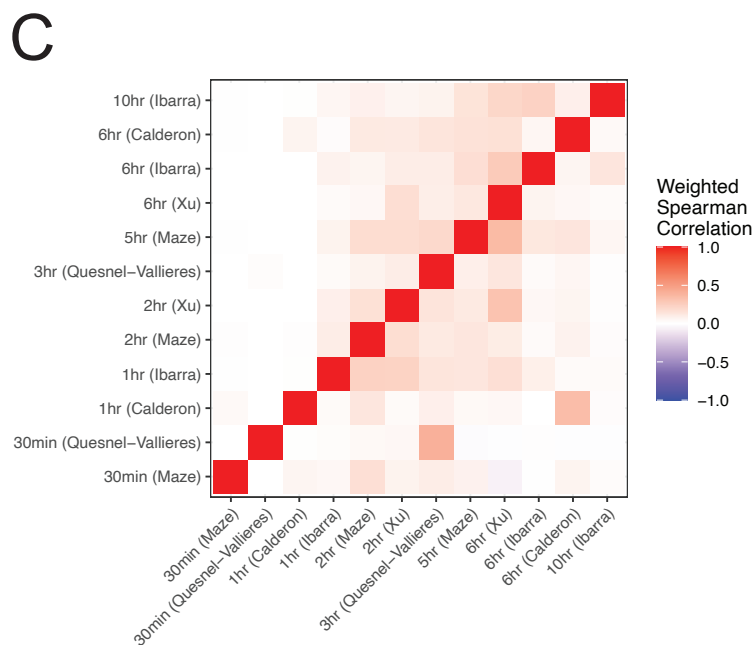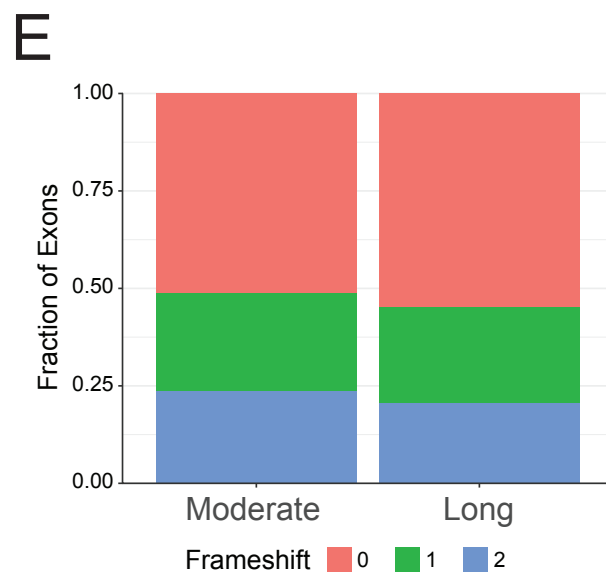

**Supplemental Figure 6. KCl-dependent exons are marked by particular features. (A)**

Cumulative distribution function across total gene length for KCl-dependent (blue and red lines) and control exons (grey line). (B) Percent GC across exon length bins. Each bin contains an equal number of exons for each group. (C) Heatmap of weighted Spearman Rank correlations between all datasets used in analysis (see Methods for description of calculation). Datasets categorized as “moderate” and “long” after KCl stimulation are designated. Q-V is equivalent to Quesnel-Vallieres, et al. (D) Fraction of KCl-dependent exons classified as translated and untranslated. Annotations are taken from GENCODE annotations of mm39 (v31). (E) Fraction of KCl-dependent exons exhibiting a 0, +1, or +2 frameshift. Frameshifts are calculated based on exon length being a multiple of three.

A

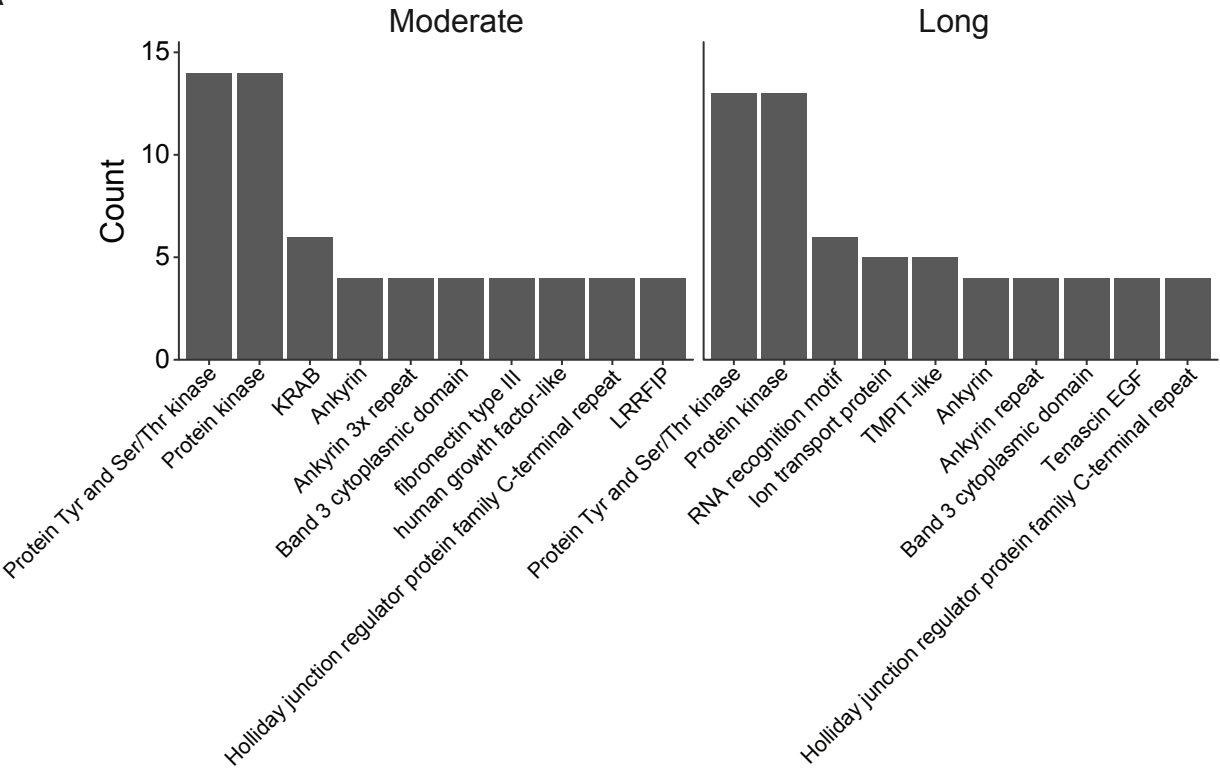

**Supplemental Figure 7. High confidence KCl-dependent exons alter the coding potential of a diverse group of functional protein domains.** (A) left, top 10 most frequently overlapping Pfam domains with moderate high confidence KCl-dependent exons that do not induce a frameshift; right, top 10 most frequently overlapping Pfam domains with long high confidence KCl-dependent that do not induce a frameshift.

**A**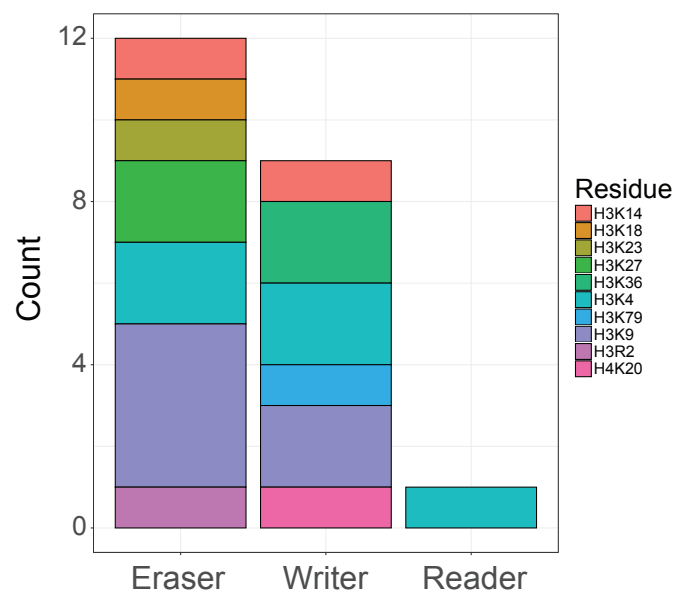**B**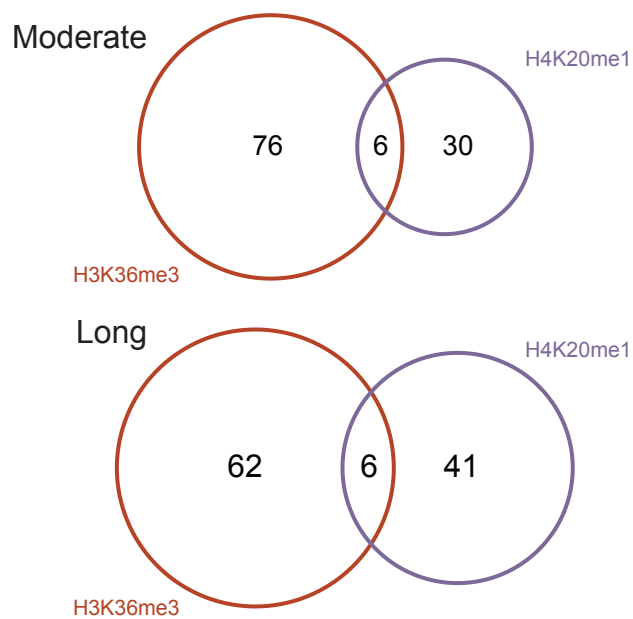

**Supplemental Figure 8. KCl treatment alters the splicing of many histone modifying enzymes.** (A) Stacked bar graph of genes under the GO term “histone modification” whose splicing is altered by KCl. Color denotes the primary target residue. (B) Euler plot of KCl-dependent exons under KCl-dependent H3K36me3 or H4K20me1 peaks.



Differential Expression    Down    Up    No change

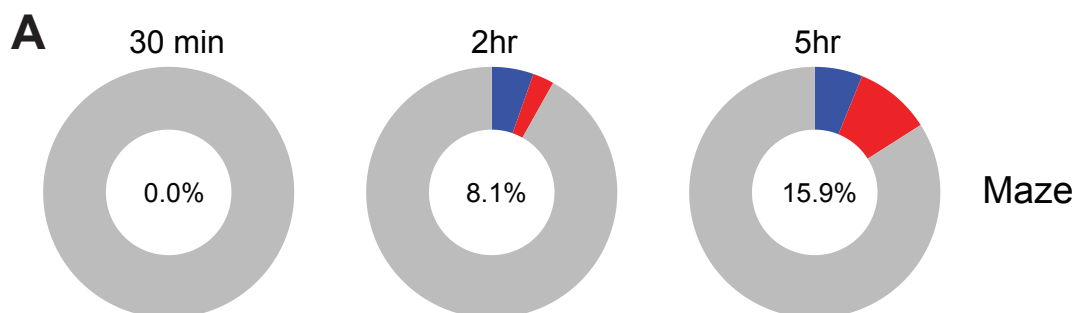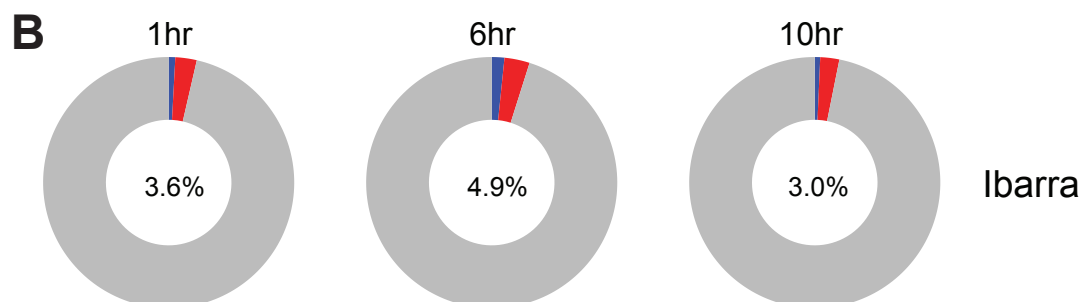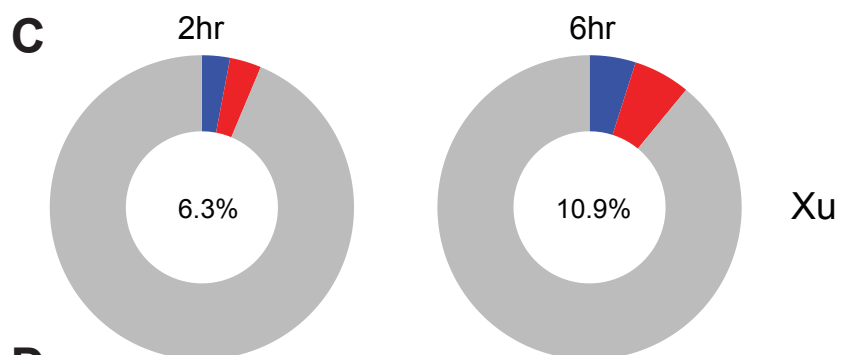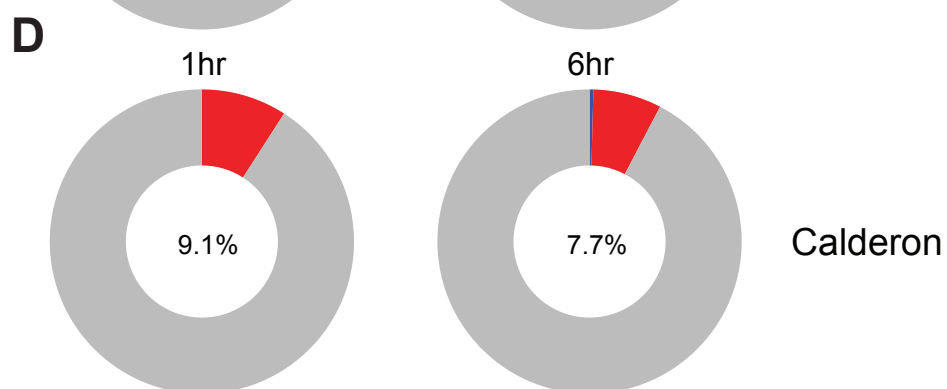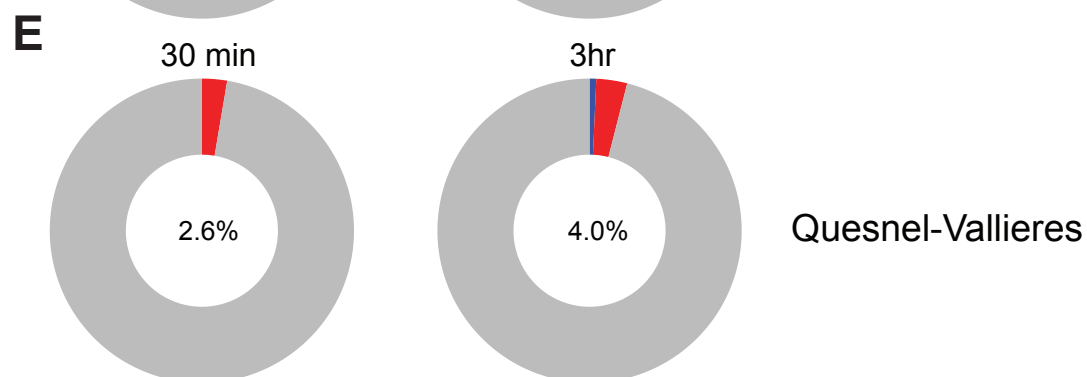

**Supplemental Figure 9. Genes containing frameshifted, KCl-dependent exons are not differentially expressed.** (A) Proportion of frameshifting, KCl-dependent exons which are also differentially expressed in Maze, et al. using relaxed cutoffs ( $L2FC > 1$ ;  $p_{adj} < 0.05$ ). Percentage at the center of each plot denotes the percentage of exons which are differentially expressed (both up- and down-regulated). (B) Same as (A) for Ibarra, et al. (C) Same as (A) for Xu, et al. (D) Same as (A) for Calderon, et al. (E) Same as (A) Quesnel-Vallieres, et al.
