# Supplementary material for: Meta-analysis of activated neurons reveals dynamic regulation of diverse classes of alternative splicing
Source: HighWire-hosted journal article supplement (doi:10.1101/gr.280082.124), 2025-04-24
Supplement: supplemental_table_1_immediate_early_genes.xlsx [file supplemental_table_1_immediate_early_genes.xlsx]

## Sheet: expression
Supplemental Table 1. Differential expression and alternative splicing of immediate early genes.
Moderate
GeneID	geneSymbol	xu_l2fc	maze_l2fc	qv_l2fc	ibarra_l2fc	calderon_l2fc	xu_sval	maze_sval	qv_sval	ibarra_sval	calderon_sval	num_datasets
ENSMUSG00000003545.4	Fosb	9.50653	7.18842	6.58555	9.29102	6.31914	1.02435e-23	0	4.96766e-55	5.97591e-108	4.62959e-87	5
ENSMUSG00000007617.19	Homer1	2.51492	3.13846	2.39409	2.41494		6.47931e-08	3.12386e-152	1.99475e-06	2.85623e-17		4
ENSMUSG00000021250.14	Fos	7.65822	5.80341	5.23428	6.90568	6.44516	6.67092e-142	0	1.08925e-90	1.01201e-188	2.71859e-124	5
ENSMUSG00000022602.15	Arc	2.2319	1.81268	2.70069	1.87972	6.74879	0.0170047	0.000155672	2.16135e-10	0.0495495	3.52761e-147	5
ENSMUSG00000023034.8	Nr4a1	5.85191	5.49438	3.93609	6.48639	6.49924	9.08058e-67	0	3.48136e-36	1.50738e-51	3.46761e-182	5
ENSMUSG00000026826.14	Nr4a2	5.59838	5.7049	3.72614	4.83969	5.87888	5.98555e-140	0	1.33135e-23	1.28516e-182	1.6876e-83	5
ENSMUSG00000028341.10	Nr4a3	3.82817	3.30443	2.36981	3.25963	2.61154	6.33179e-53	1.04027e-238	4.61203e-09	2.28624e-13	3.77758e-11	5
ENSMUSG00000037868.16	Egr2	2.25438	4.7405	2.49966	3.05097	5.79022	0.0044508	4.01114e-161	0.000122767	5.49318e-05	3.36338e-86	5
ENSMUSG00000045903.10	Npas4	7.54759	6.15157	5.18794	5.66346	5.96403	3.67253e-146	0	6.82158e-37	2.28623e-15	1.01708e-80	5
ENSMUSG00000048482.15	Bdnf	3.99236	3.35779	2.25456	2.95615		5.36052e-25	6.96383e-128	0.00045056	5.20114e-07		4
ENSMUSG00000052837.8	Junb	5.05183	4.57726	3.89625	5.55033	5.304	1.13518e-13	0	2.12024e-20	1.67304e-107	5.69557e-14	5
ENSMUSG00000071341.5	Egr4	3.02824	3.35296	3.45668	5.92019	5.54422	0.0322366	2.54104e-48	1.05082e-15	2.80383e-11	7.97801e-12	5
ENSMUSG00000033730.5	Egr3		1.78006			3.7625		0.000117415			6.82636e-21	2
ENSMUSG00000024912.7	Fosl1		1.96419	3.9168				0.0205919	3.72189e-14			2
Long
GeneID	geneSymbol	xu_l2fc	maze_l2fc	calderon_l2fc	ibarra_l2fc	xu_sval	maze_sval	calderon_sval	ibarra_sval	num_datasets
ENSMUSG00000003545.4	Fosb	6.03809	8.57695	4.58166	5.31295	2.97411e-10	3.09746e-194	6.71502e-32	2.2123e-18	4
ENSMUSG00000007617.19	Homer1	1.92353	2.72358	2.60845		5.32104e-08	1.72703e-54	1.14696e-08		3
ENSMUSG00000021250.14	Fos	6.62492	7.54281	5.1442	5.91625	1.45296e-167	0	3.20054e-73	1.87426e-74	4
ENSMUSG00000022602.15	Arc	2.6334	3.13727	3.73076		0.000841465	1.11909e-19	1.2751e-25		3
ENSMUSG00000023034.8	Nr4a1	4.46697	4.52505	4.77474	4.43553	3.10872e-12	3.32426e-216	5.32938e-47	7.74831e-48	4
ENSMUSG00000026826.14	Nr4a2	3.53175	4.83112	4.69514	2.06328	1.61739e-52	0	5.39076e-33	0.000588486	4
ENSMUSG00000028341.10	Nr4a3	3.12867	3.93396	3.09104	2.50262	3.12563e-107	7.43493e-252	6.78649e-23	1.2422e-13	4
ENSMUSG00000045903.10	Npas4	6.25358	5.87983	5.37778	4.27464	5.17074e-155	0	3.24436e-49	1.9838e-45	4
ENSMUSG00000048482.15	Bdnf	4.6764	5.37495	5.13914	4.58379	7.11014e-92	0	9.75869e-113	7.27872e-49	4
ENSMUSG00000052837.8	Junb	2.33293	4.76806	3.14072	2.99045	0.0397571	5.97934e-100	1.19614e-22	2.91267e-09	4
ENSMUSG00000055254.16	Ntrk2		1.66138	1.94236			0.00300121	0.00133038		2
ENSMUSG00000071341.5	Egr4		3.67689	2.08538	5.0954		1.11744e-17	0.0161576	4.43699e-07	3

## Sheet: splicing
Supplemental Table 1. Differential expression and alternative splicing of immediate early genes.
Moderate
GeneID	geneSymbol	chr	strand	start	end	upstreamES	upstreamEE	downstreamES	downstreamEE	xu_dpsi	ibarra_dpsi	xu_fdr	ibarra_fdr	num_datasets	maze_dpsi	qv_dpsi	maze_fdr	qv_fdr	calderon_dpsi	calderon_fdr
ENSMUSG00000003573.16	Homer3	chr8	+	70738043	70738200	70737883	70737965	70738580	70738712	-0.157	-0.158	0.000670381	0.0188742	3		-0.129		0
ENSMUSG00000001419.18	Mef2d	chr3	+	88065340	88065478	88063628	88063832	88066428	88066639	-0.426	-0.206	0	0.00848068	4	-0.192	-0.274	6.81802e-09	0
ENSMUSG00000001419.18	Mef2d	chr3	+	88065527	88065662	88063628	88063832	88066428	88066639	-0.221	-0.933	0.0051196	1.80946e-07	3		-0.336		1.00229e-05
ENSMUSG00000001419.18	Mef2d	chr3	+	88066428	88066639	88063628	88063832	88068497	88068688	-0.246	-0.432	1.82733e-05	6.65616e-05	3	-0.285		5.05168e-14
ENSMUSG00000005583.17	Mef2c	chr13	+	83773383	83773443	83740896	83741100	83773588	83773726		-0.119		0.0350641	2		-0.119		7.24895e-14
ENSMUSG00000005583.17	Mef2c	chr13	+	83773588	83773726	83740896	83741100	83781173	83781360	0.248		0.00107442		3	0.355	0.454	0.0298434	2.24747e-11
ENSMUSG00000001419.18	Mef2d	chr3	+	88066842	88066899	88063628	88063832	88068497	88068688	-0.399		1.03849e-08		2		-0.113		2.25071e-08
ENSMUSG00000001419.18	Mef2d	chr3	+	88075344	88075651	88074821	88075041	88075938	88075962	-0.109		0.0106628		2		-0.191		0
ENSMUSG00000023034.8	Nr4a1	chr15	+	101166808	101166984	101164726	101164852	101167963	101168005					2	-0.568	-0.182	0.00478636	0
Long
GeneID	geneSymbol	chr	strand	start	end	upstreamES	upstreamEE	downstreamES	downstreamEE	xu_dpsi	maze_dpsi	ibarra_dpsi	xu_fdr	maze_fdr	ibarra_fdr	num_datasets	calderon_dpsi	calderon_fdr
ENSMUSG00000003573.16	Homer3	chr8	+	70738043	70738200	70737883	70737965	70738580	70738712	-0.178		-0.147	3.09766e-05		0.00260187	2
ENSMUSG00000001419.18	Mef2d	chr3	+	88065527	88065662	88063628	88063832	88066428	88066639	-0.206		-0.818	0.0440189		3.35049e-05	2
ENSMUSG00000023034.8	Nr4a1	chr15	+	101166808	101166984	101164726	101164852	101167963	101168005		-0.903	-0.918		1.05003e-09	0.00167666	2
ENSMUSG00000005583.17	Mef2c	chr13	+	83773383	83773443	83740896	83741100	83773588	83773726	-0.16	-0.223		0	0		3	-0.169	0
ENSMUSG00000001419.18	Mef2d	chr3	+	88065340	88065478	88063628	88063832	88066428	88066639	-0.301	-0.43		0	0		2
ENSMUSG00000001419.18	Mef2d	chr3	+	88066842	88066899	88063628	88063832	88068497	88068688	-0.367	-0.263		7.77059e-10	0.00516198		2
ENSMUSG00000005583.17	Mef2c	chr13	+	83773588	83773726	83740896	83741100	83781173	83781360	0.258			7.14157e-05			2	0.553	0
