# Supplementary material for: Meta-analysis of activated neurons reveals dynamic regulation of diverse classes of alternative splicing
Source: HighWire-hosted journal article supplement (doi:10.1101/gr.280082.124), 2025-04-24
Supplement: supplemental_table_2_summary_table.xlsx [file supplemental_table_2_summary_table.xlsx]

## Sheet: counts
Supplemental Table 2. Summary of Differentially Expressed and Differentially Spliced genes across datasets.
		Differentially Spliced Genes			Differentially Expressed Genes
	Maze, et al. 2016	30min	2hr	5hr	30min	2hr	5hr
		392	2033	1520	38	1736	2330
	Ibarra, et al. 2022	1hr	6hr	10hr	1hr	6hr	10hr
		1179	1137	732	554	554	316
	Calderon, et al. 2022	1hr	6hr		1hr	6hr
		452	1446		165	862
	Xu, et al. 2022	2hr	6hr		2hr	6hr
		2011	3043		820	1357
	Quesnel-Vallieres, et al. 2016	30min	3hr		30min	3hr
		272	2449		46	570
