# Supplementary material for: Meta-analysis of activated neurons reveals dynamic regulation of diverse classes of alternative splicing
Source: HighWire-hosted journal article supplement (doi:10.1101/gr.280082.124), 2025-04-24
Supplement: supplemental_table_3_overlapping_events_in_each_datasets.xlsx [file supplemental_table_3_overlapping_events_in_each_datasets.xlsx]

## Sheet: Sheet1
Supplemental Table 3. Fraction of alternative splicing events for each condition that is shared by at least one other dataset.
dataset	timepoint	number total changing events	number of overlapping events	% overlapping
Ibarra	1hr	852	484	56.8075
Ibarra	6hr	1039	592	56.9779
Xu	2hr	2199	1022	46.4757
Xu	6hr	4084	1171	28.6729
Maze	2hr	1996	849	42.5351
Maze	5hr	1418	886	62.4824
Calderon	1hr	251	67	26.6932
Calderon	6hr	1243	369	29.6862
Quesnel-Vallieres	3hr	3082	900	29.2018
