# Supplementary material for: Meta-analysis of activated neurons reveals dynamic regulation of diverse classes of alternative splicing
Source: HighWire-hosted journal article supplement (doi:10.1101/gr.280082.124), 2025-04-24
Supplement: supplemental_table_4_maze_go_only_unique.xlsx [file supplemental_table_4_maze_go_only_unique.xlsx]

## Sheet: Sheet1
Supplemental Table 4. Significant Gene Ontology terms in Maze, et al. using differentially spliced genes unique to each timepoint.
30min
p_value	term_size	query_size	intersection_size	precision	recall	term_id	source	term_name	effective_domain_size	source_order
NO ENRICHED TERMS
2hr
p_value	term_size	query_size	intersection_size	precision	recall	term_id	source	term_name	effective_domain_size	source_order
NO ENRICHED TERMS
5hr
p_value	term_size	query_size	intersection_size	precision	recall	term_id	source	term_name	effective_domain_size	source_order
0.000441531	619	496	62	0.125	0.100162	GO:0099536	GO:BP	synaptic signaling	10554	20016
0.00289785	591	496	58	0.116935	0.0981387	GO:0099537	GO:BP	trans-synaptic signaling	10554	20017
0.00294067	447	496	48	0.0967742	0.107383	GO:0050808	GO:BP	synapse organization	10554	13932
0.00518212	586	496	57	0.114919	0.0972696	GO:0007268	GO:BP	chemical synaptic transmission	10554	2847
0.00518212	586	496	57	0.114919	0.0972696	GO:0098916	GO:BP	anterograde trans-synaptic signaling	10554	19849
0.0485842	596	496	55	0.110887	0.0922819	GO:0034330	GO:BP	cell junction organization	10554	8964
