# Supplementary material for: Meta-analysis of activated neurons reveals dynamic regulation of diverse classes of alternative splicing
Source: HighWire-hosted journal article supplement (doi:10.1101/gr.280082.124), 2025-04-24
Supplement: supplemental_table_5_go_on_all_datasets.xlsx [file supplemental_table_5_go_on_all_datasets.xlsx]

## Sheet: ibarra_1hr_KCl
Supplemental Table 5. Significant Gene Ontology terms for all datasets.
SPLICING
p_value	term_size	query_size	intersection_size	precision	recall	term_id	source	term_name	effective_domain_size	source_order
5.33408e-09	2232	561	182	0.324421	0.0815412	GO:0051252	GO:BP	regulation of RNA metabolic process	11381	14280
3.11769e-08	2462	561	193	0.344029	0.0783916	GO:0019219	GO:BP	regulation of nucleobase-containing compound metabolic process	11381	5852
1.95895e-06	3513	561	245	0.43672	0.069741	GO:0051171	GO:BP	regulation of nitrogen compound metabolic process	11381	14228
3.50854e-06	3625	561	250	0.445633	0.0689655	GO:0080090	GO:BP	regulation of primary metabolic process	11381	18641
2.97533e-05	2901	561	207	0.368984	0.0713547	GO:0010468	GO:BP	regulation of gene expression	11381	4230
3.10961e-05	3792	561	255	0.454545	0.0672468	GO:0060255	GO:BP	regulation of macromolecule metabolic process	11381	15204
4.54362e-05	2788	561	200	0.356506	0.071736	GO:0016070	GO:BP	RNA metabolic process	11381	5184
6.78011e-05	1994	561	154	0.27451	0.0772317	GO:0006355	GO:BP	regulation of DNA-templated transcription	11381	2165
0.000105048	2006	561	154	0.27451	0.0767697	GO:2001141	GO:BP	regulation of RNA biosynthetic process	11381	27454
0.000138782	3005	561	210	0.374332	0.0698835	GO:0010556	GO:BP	regulation of macromolecule biosynthetic process	11381	4280
0.000242249	2081	561	157	0.279857	0.0754445	GO:0006351	GO:BP	DNA-templated transcription	11381	2161
0.00027993	1464	561	120	0.213904	0.0819672	GO:0010558	GO:BP	negative regulation of macromolecule biosynthetic process	11381	4282
0.000307922	1499	561	122	0.217469	0.0813876	GO:0031327	GO:BP	negative regulation of cellular biosynthetic process	11381	7465
0.000315719	1516	561	123	0.219251	0.0811346	GO:0009890	GO:BP	negative regulation of biosynthetic process	11381	3808
0.000395253	3169	561	217	0.386809	0.0684759	GO:0090304	GO:BP	nucleic acid metabolic process	11381	19056
0.000427585	3098	561	213	0.379679	0.068754	GO:0031326	GO:BP	regulation of cellular biosynthetic process	11381	7464
0.000532728	2104	561	157	0.279857	0.0746198	GO:0032774	GO:BP	RNA biosynthetic process	11381	8184
0.000596519	3128	561	214	0.381462	0.0684143	GO:0009889	GO:BP	regulation of biosynthetic process	11381	3807
0.000674433	4134	561	267	0.475936	0.0645864	GO:0019222	GO:BP	regulation of metabolic process	11381	5855
0.000989264	3784	561	248	0.442068	0.0655391	GO:0031323	GO:BP	regulation of cellular metabolic process	11381	7461
0.0015306	1507	561	120	0.213904	0.0796284	GO:0006357	GO:BP	regulation of transcription by RNA polymerase II	11381	2167
0.00264887	236	561	33	0.0588235	0.139831	GO:0018205	GO:BP	peptidyl-lysine modification	11381	5525
0.00339357	873	561	79	0.14082	0.0904926	GO:0045892	GO:BP	negative regulation of DNA-templated transcription	11381	12307
0.0035454	966	561	85	0.151515	0.0879917	GO:0051253	GO:BP	negative regulation of RNA metabolic process	11381	14281
0.00399103	1566	561	122	0.217469	0.0779055	GO:0006366	GO:BP	transcription by RNA polymerase II	11381	2174
0.00432989	878	561	79	0.14082	0.0899772	GO:1902679	GO:BP	negative regulation of RNA biosynthetic process	11381	23341
0.00806035	156	561	25	0.0445633	0.160256	GO:0043484	GO:BP	regulation of RNA splicing	11381	11241
0.0173383	1830	561	135	0.240642	0.0737705	GO:0031324	GO:BP	negative regulation of cellular metabolic process	11381	7462
0.0213051	1054	561	88	0.156863	0.0834915	GO:0045934	GO:BP	negative regulation of nucleobase-containing compound metabolic process	11381	12345
0.026715	1861	561	136	0.242424	0.073079	GO:0010605	GO:BP	negative regulation of macromolecule metabolic process	11381	4324
0.0441081	1602	561	120	0.213904	0.0749064	GO:0051172	GO:BP	negative regulation of nitrogen compound metabolic process	11381	14229
0.0472492	1187	561	95	0.16934	0.0800337	GO:0051254	GO:BP	positive regulation of RNA metabolic process	11381	14282
0.00563268	481	567	52	0.0917108	0.108108	GO:0008134	GO:MF	transcription factor binding	11312	1574
EXPRESSION
p_value	term_size	query_size	intersection_size	precision	recall	term_id	source	term_name	effective_domain_size	source_order
6.59758e-08	2081	158	67	0.424051	0.0321961	GO:0006351	GO:BP	DNA-templated transcription	11381	2161
1.11809e-07	2104	158	67	0.424051	0.0318441	GO:0032774	GO:BP	RNA biosynthetic process	11381	8184
3.40718e-07	1994	158	64	0.405063	0.0320963	GO:0006355	GO:BP	regulation of DNA-templated transcription	11381	2165
4.47433e-07	2006	158	64	0.405063	0.0319043	GO:2001141	GO:BP	regulation of RNA biosynthetic process	11381	27454
6.68408e-07	2462	158	72	0.455696	0.0292445	GO:0019219	GO:BP	regulation of nucleobase-containing compound metabolic process	11381	5852
1.80266e-06	2232	158	67	0.424051	0.0300179	GO:0051252	GO:BP	regulation of RNA metabolic process	11381	14280
1.84657e-06	1507	158	53	0.335443	0.0351692	GO:0006357	GO:BP	regulation of transcription by RNA polymerase II	11381	2167
2.37275e-06	1566	158	54	0.341772	0.0344828	GO:0006366	GO:BP	transcription by RNA polymerase II	11381	2174
1.2031e-05	2788	158	75	0.474684	0.026901	GO:0016070	GO:BP	RNA metabolic process	11381	5184
3.31078e-05	2494	158	69	0.436709	0.0276664	GO:1901362	GO:BP	organic cyclic compound biosynthetic process	11381	22266
3.78007e-05	2387	158	67	0.424051	0.0280687	GO:0034654	GO:BP	nucleobase-containing compound biosynthetic process	11381	9112
4.53044e-05	3169	158	80	0.506329	0.0252446	GO:0090304	GO:BP	nucleic acid metabolic process	11381	19056
8.76261e-05	2433	158	67	0.424051	0.027538	GO:0018130	GO:BP	heterocycle biosynthetic process	11381	5461
8.76261e-05	2433	158	67	0.424051	0.027538	GO:0019438	GO:BP	aromatic compound biosynthetic process	11381	6052
0.000226247	2901	158	74	0.468354	0.0255084	GO:0010468	GO:BP	regulation of gene expression	11381	4230
0.000354591	2990	158	75	0.474684	0.0250836	GO:0044271	GO:BP	cellular nitrogen compound biosynthetic process	11381	11501
0.000448491	3005	158	75	0.474684	0.0249584	GO:0010556	GO:BP	regulation of macromolecule biosynthetic process	11381	4280
0.000490972	3513	158	83	0.525316	0.0236265	GO:0051171	GO:BP	regulation of nitrogen compound metabolic process	11381	14228
0.000603313	678	158	30	0.189873	0.0442478	GO:0000122	GO:BP	negative regulation of transcription by RNA polymerase II	11381	51
0.00072709	3098	158	76	0.481013	0.024532	GO:0031326	GO:BP	regulation of cellular biosynthetic process	11381	7464
0.00114122	3128	158	76	0.481013	0.0242967	GO:0009889	GO:BP	regulation of biosynthetic process	11381	3807
0.00160253	3792	158	86	0.544304	0.0226793	GO:0060255	GO:BP	regulation of macromolecule metabolic process	11381	15204
0.0023947	3625	158	83	0.525316	0.0228966	GO:0080090	GO:BP	regulation of primary metabolic process	11381	18641
0.00455551	3738	158	84	0.531646	0.0224719	GO:1901360	GO:BP	organic cyclic compound metabolic process	11381	22264
0.00832528	3784	158	84	0.531646	0.0221987	GO:0031323	GO:BP	regulation of cellular metabolic process	11381	7461
0.00856241	3525	158	80	0.506329	0.022695	GO:0006139	GO:BP	nucleobase-containing compound metabolic process	11381	2013
0.0161193	3969	158	86	0.544304	0.0216679	GO:0034641	GO:BP	cellular nitrogen compound metabolic process	11381	9105
0.0197471	3852	158	84	0.531646	0.0218069	GO:0010467	GO:BP	gene expression	11381	4229
0.0257326	3610	158	80	0.506329	0.0221607	GO:0046483	GO:BP	heterocycle metabolic process	11381	12812
0.0317924	1602	158	46	0.291139	0.0287141	GO:0051172	GO:BP	negative regulation of nitrogen compound metabolic process	11381	14229
0.0388771	3643	158	80	0.506329	0.0219599	GO:0006725	GO:BP	cellular aromatic compound metabolic process	11381	2468
0.0473668	873	158	31	0.196203	0.0355097	GO:0045892	GO:BP	negative regulation of DNA-templated transcription	11381	12307
3.65995e-15	656	172	47	0.273256	0.0716463	GO:0000987	GO:MF	cis-regulatory region sequence-specific DNA binding	11312	120
8.25051e-15	639	172	46	0.267442	0.0719875	GO:0000978	GO:MF	RNA polymerase II cis-regulatory region sequence-specific DNA binding	11312	117
1.34427e-14	708	172	48	0.27907	0.0677966	GO:0000977	GO:MF	RNA polymerase II transcription regulatory region sequence-specific DNA binding	11312	116
1.74092e-13	786	172	49	0.284884	0.062341	GO:0000976	GO:MF	transcription cis-regulatory region binding	11312	115
2.26535e-13	791	172	49	0.284884	0.0619469	GO:0001067	GO:MF	transcription regulatory region nucleic acid binding	11312	151
2.63289e-13	635	172	44	0.255814	0.0692913	GO:0003700	GO:MF	DNA-binding transcription factor activity	11312	338
1.64648e-12	830	172	49	0.284884	0.0590361	GO:1990837	GO:MF	sequence-specific double-stranded DNA binding	11312	11191
2.39248e-12	907	172	51	0.296512	0.0562293	GO:0043565	GO:MF	sequence-specific DNA binding	11312	5815
4.95987e-12	593	172	41	0.238372	0.06914	GO:0000981	GO:MF	DNA-binding transcription factor activity, RNA polymerase II-specific	11312	119
5.06048e-12	888	172	50	0.290698	0.0563063	GO:0003690	GO:MF	double-stranded DNA binding	11312	332
4.81366e-10	1187	172	55	0.319767	0.0463353	GO:0003677	GO:MF	DNA binding	11312	324
5.87856e-09	982	172	48	0.27907	0.0488798	GO:0140110	GO:MF	transcription regulator activity	11312	10515
1.9669e-05	1874	172	62	0.360465	0.0330843	GO:0003676	GO:MF	nucleic acid binding	11312	323
0.000359479	277	172	20	0.116279	0.0722022	GO:0001228	GO:MF	DNA-binding transcription activator activity, RNA polymerase II-specific	11312	185
0.000459143	281	172	20	0.116279	0.0711744	GO:0001216	GO:MF	DNA-binding transcription activator activity	11312	179
0.00838274	2450	172	67	0.389535	0.0273469	GO:1901363	GO:MF	heterocyclic compound binding	11312	10949
0.0100248	218	172	16	0.0930233	0.0733945	GO:0001227	GO:MF	DNA-binding transcription repressor activity, RNA polymerase II-specific	11312	184
0.0128551	222	172	16	0.0930233	0.0720721	GO:0001217	GO:MF	DNA-binding transcription repressor activity	11312	180
0.016351	2492	172	67	0.389535	0.026886	GO:0097159	GO:MF	organic cyclic compound binding	11312	9139

## Sheet: ibarra_6hr_KCl
Supplemental Table 5. Significant Gene Ontology terms for all datasets.
SPLICING
p_value	term_size	query_size	intersection_size	precision	recall	term_id	source	term_name	effective_domain_size	source_order
1.05262e-05	129	691	30	0.0434153	0.232558	GO:0007269	GO:BP	neurotransmitter secretion	11082	2848
1.05262e-05	129	691	30	0.0434153	0.232558	GO:0099643	GO:BP	signal release from synapse	11082	20084
0.000245716	627	691	77	0.111433	0.122807	GO:0099536	GO:BP	synaptic signaling	11082	20016
0.000320643	156	691	31	0.0448625	0.198718	GO:0006836	GO:BP	neurotransmitter transport	11082	2546
0.000362387	598	691	74	0.107091	0.123746	GO:0099537	GO:BP	trans-synaptic signaling	11082	20017
0.000376388	157	691	31	0.0448625	0.197452	GO:0001505	GO:BP	regulation of neurotransmitter levels	11082	331
0.000577868	593	691	73	0.105644	0.123103	GO:0007268	GO:BP	chemical synaptic transmission	11082	2847
0.000577868	593	691	73	0.105644	0.123103	GO:0098916	GO:BP	anterograde trans-synaptic signaling	11082	19849
0.000653554	224	691	38	0.0549928	0.169643	GO:0099003	GO:BP	vesicle-mediated transport in synapse	11082	19899
0.000851898	189	691	34	0.0492041	0.179894	GO:0099504	GO:BP	synaptic vesicle cycle	11082	20001
0.00160272	92	691	22	0.0318379	0.23913	GO:0016079	GO:BP	synaptic vesicle exocytosis	11082	5193
0.00937285	383	691	51	0.0738061	0.133159	GO:0023061	GO:BP	signal release	11082	6960
0.0130274	465	691	58	0.0839363	0.124731	GO:0050804	GO:BP	modulation of chemical synaptic transmission	11082	13928
0.0140187	466	691	58	0.0839363	0.124464	GO:0099177	GO:BP	regulation of trans-synaptic signaling	11082	19986
EXPRESSION
p_value	term_size	query_size	intersection_size	precision	recall	term_id	source	term_name	effective_domain_size	source_order
NO ENRICHED TERMS

## Sheet: ibarra_10hr_KCl
Supplemental Table 5. Significant Gene Ontology terms for all datasets.
SPLICING
p_value	term_size	query_size	intersection_size	precision	recall	term_id	source	term_name	effective_domain_size	source_order
NO ENRICHED TERMS
EXPRESSION
p_value	term_size	query_size	intersection_size	precision	recall	term_id	source	term_name	effective_domain_size	source_order
0.00117807	328	141	19	0.134752	0.0579268	GO:0007186	GO:BP	G protein-coupled receptor signaling pathway	11296	2791
0.00261851	672	141	27	0.191489	0.0401786	GO:0050877	GO:BP	nervous system process	11296	13987
0.00268487	1058	141	35	0.248227	0.0330813	GO:0003008	GO:BP	system process	11296	1473
0.0111766	4252	141	83	0.588652	0.0195202	GO:0032501	GO:BP	multicellular organismal process	11296	7975
0.0120302	544	141	23	0.163121	0.0422794	GO:0007610	GO:BP	behavior	11296	3120
0.00398484	156	142	13	0.0915493	0.0833333	GO:0030545	GO:MF	signaling receptor regulator activity	11243	3962
0.00807245	138	142	12	0.084507	0.0869565	GO:0048018	GO:MF	receptor ligand activity	11243	7297
0.0119347	143	142	12	0.084507	0.0839161	GO:0030546	GO:MF	signaling receptor activator activity	11243	3963

## Sheet: maze_30min_KCl
Supplemental Table 5. Significant Gene Ontology terms for all datasets.
SPLICING
p_value	term_size	query_size	intersection_size	precision	recall	term_id	source	term_name	effective_domain_size	source_order
NO ENRICHED TERMS
EXPRESSION
p_value	term_size	query_size	intersection_size	precision	recall	term_id	source	term_name	effective_domain_size	source_order
0.000266556	748	15	10	0.666667	0.013369	GO:0045944	GO:BP	positive regulation of transcription by RNA polymerase II	10779	12354
0.00318214	3576	15	15	1	0.00419463	GO:0048522	GO:BP	positive regulation of cellular process	10779	13455
0.00407626	992	15	10	0.666667	0.0100806	GO:0045893	GO:BP	positive regulation of DNA-templated transcription	10779	12308
0.00431891	998	15	10	0.666667	0.01002	GO:1902680	GO:BP	positive regulation of RNA biosynthetic process	10779	23342
0.00821512	1420	15	11	0.733333	0.00774648	GO:0006357	GO:BP	regulation of transcription by RNA polymerase II	10779	2167
0.0104326	3870	15	15	1	0.00387597	GO:0048518	GO:BP	positive regulation of biological process	10779	13451
0.0110448	1101	15	10	0.666667	0.00908265	GO:0051254	GO:BP	positive regulation of RNA metabolic process	10779	14282
0.0124963	1478	15	11	0.733333	0.00744249	GO:0006366	GO:BP	transcription by RNA polymerase II	10779	2174
0.0269276	50	15	4	0.266667	0.08	GO:0035914	GO:BP	skeletal muscle cell differentiation	10779	9783
0.0376855	1253	15	10	0.666667	0.00798085	GO:0045935	GO:BP	positive regulation of nucleobase-containing compound metabolic process	10779	12346
1.15657e-05	253	14	8	0.571429	0.0316206	GO:0001228	GO:MF	DNA-binding transcription activator activity, RNA polymerase II-specific	10707	185
1.31085e-05	257	14	8	0.571429	0.0311284	GO:0001216	GO:MF	DNA-binding transcription activator activity	10707	179
0.00511468	548	14	8	0.571429	0.0145985	GO:0000981	GO:MF	DNA-binding transcription factor activity, RNA polymerase II-specific	10707	119
0.00883204	588	14	8	0.571429	0.0136054	GO:0003700	GO:MF	DNA-binding transcription factor activity	10707	338
0.0108708	604	14	8	0.571429	0.013245	GO:0000978	GO:MF	RNA polymerase II cis-regulatory region sequence-specific DNA binding	10707	117
0.0131394	619	14	8	0.571429	0.0129241	GO:0000987	GO:MF	cis-regulatory region sequence-specific DNA binding	10707	120
0.0244635	671	14	8	0.571429	0.0119225	GO:0000977	GO:MF	RNA polymerase II transcription regulatory region sequence-specific DNA binding	10707	116

## Sheet: maze_2hr_KCl
Supplemental Table 5. Significant Gene Ontology terms for all datasets.
SPLICING
p_value	term_size	query_size	intersection_size	precision	recall	term_id	source	term_name	effective_domain_size	source_order
0.000870876	2689	1090	352	0.322936	0.130904	GO:0010468	GO:BP	regulation of gene expression	10665	4230
0.000974019	2068	1090	282	0.258716	0.136364	GO:0051252	GO:BP	regulation of RNA metabolic process	10665	14280
0.00546295	2614	1090	339	0.311009	0.129686	GO:0016070	GO:BP	RNA metabolic process	10665	5184
0.00719099	2784	1090	357	0.327523	0.128233	GO:0010556	GO:BP	regulation of macromolecule biosynthetic process	10665	4280
0.00746629	2271	1090	300	0.275229	0.1321	GO:0019219	GO:BP	regulation of nucleobase-containing compound metabolic process	10665	5852
0.0103356	3504	1090	434	0.398165	0.123858	GO:0031323	GO:BP	regulation of cellular metabolic process	10665	7461
0.0236632	2878	1090	364	0.333945	0.126477	GO:0031326	GO:BP	regulation of cellular biosynthetic process	10665	7464
0.024112	2906	1090	367	0.336697	0.12629	GO:0009889	GO:BP	regulation of biosynthetic process	10665	3807
0.0261083	2954	1090	372	0.341284	0.125931	GO:0090304	GO:BP	nucleic acid metabolic process	10665	19056
0.0374672	3502	1090	430	0.394495	0.122787	GO:0060255	GO:BP	regulation of macromolecule metabolic process	10665	15204
0.0254958	151	1103	37	0.0335449	0.245033	GO:0140993	GO:MF	histone modifying activity	10566	10851
EXPRESSION
p_value	term_size	query_size	intersection_size	precision	recall	term_id	source	term_name	effective_domain_size	source_order
2.21314e-05	1924	300	98	0.326667	0.0509356	GO:0006351	GO:BP	DNA-templated transcription	10665	2161
2.27911e-05	2068	300	103	0.343333	0.0498066	GO:0051252	GO:BP	regulation of RNA metabolic process	10665	14280
3.2775e-05	1388	300	78	0.26	0.056196	GO:0006357	GO:BP	regulation of transcription by RNA polymerase II	10665	2167
3.73749e-05	1445	300	80	0.266667	0.0553633	GO:0006366	GO:BP	transcription by RNA polymerase II	10665	2174
4.19336e-05	1946	300	98	0.326667	0.0503597	GO:0032774	GO:BP	RNA biosynthetic process	10665	8184
4.90451e-05	1838	300	94	0.313333	0.0511425	GO:0006355	GO:BP	regulation of DNA-templated transcription	10665	2165
6.76322e-05	1849	300	94	0.313333	0.0508383	GO:2001141	GO:BP	regulation of RNA biosynthetic process	10665	27454
0.00020023	2689	300	121	0.403333	0.0449981	GO:0010468	GO:BP	regulation of gene expression	10665	4230
0.000211108	2784	300	124	0.413333	0.0445402	GO:0010556	GO:BP	regulation of macromolecule biosynthetic process	10665	4280
0.000882228	2878	300	125	0.416667	0.0434329	GO:0031326	GO:BP	regulation of cellular biosynthetic process	10665	7464
0.00101414	2271	300	105	0.35	0.0462351	GO:0019219	GO:BP	regulation of nucleobase-containing compound metabolic process	10665	5852
0.00162825	2906	300	125	0.416667	0.0430145	GO:0009889	GO:BP	regulation of biosynthetic process	10665	3807
0.00252024	2614	300	115	0.383333	0.0439939	GO:0016070	GO:BP	RNA metabolic process	10665	5184
0.00421927	2211	300	101	0.336667	0.0456807	GO:0034654	GO:BP	nucleobase-containing compound biosynthetic process	10665	9112
0.0115893	2255	300	101	0.336667	0.0447894	GO:0018130	GO:BP	heterocycle biosynthetic process	10665	5461
0.0118523	2256	300	101	0.336667	0.0447695	GO:0019438	GO:BP	aromatic compound biosynthetic process	10665	6052
0.021357	2313	300	102	0.34	0.0440986	GO:1901362	GO:BP	organic cyclic compound biosynthetic process	10665	22266
2.57012e-15	574	307	62	0.201954	0.108014	GO:0000987	GO:MF	cis-regulatory region sequence-specific DNA binding	10566	120
1.57173e-14	559	307	60	0.19544	0.107335	GO:0000978	GO:MF	RNA polymerase II cis-regulatory region sequence-specific DNA binding	10566	117
6.68832e-13	622	307	61	0.198697	0.0980707	GO:0000977	GO:MF	RNA polymerase II transcription regulatory region sequence-specific DNA binding	10566	116
1.85468e-12	525	307	55	0.179153	0.104762	GO:0000981	GO:MF	DNA-binding transcription factor activity, RNA polymerase II-specific	10566	119
2.20385e-12	695	307	64	0.208469	0.0920863	GO:0000976	GO:MF	transcription cis-regulatory region binding	10566	115
3.15536e-12	700	307	64	0.208469	0.0914286	GO:0001067	GO:MF	transcription regulatory region nucleic acid binding	10566	151
1.04194e-11	564	307	56	0.18241	0.0992908	GO:0003700	GO:MF	DNA-binding transcription factor activity	10566	338
4.5947e-11	739	307	64	0.208469	0.0866035	GO:1990837	GO:MF	sequence-specific double-stranded DNA binding	10566	11191
1.13187e-09	811	307	65	0.211726	0.080148	GO:0043565	GO:MF	sequence-specific DNA binding	10566	5815
1.43959e-09	794	307	64	0.208469	0.0806045	GO:0003690	GO:MF	double-stranded DNA binding	10566	332
3.76998e-07	897	307	64	0.208469	0.0713489	GO:0140110	GO:MF	transcription regulator activity	10566	10515
1.96002e-06	1072	307	70	0.228013	0.0652985	GO:0003677	GO:MF	DNA binding	10566	324
0.000105421	244	307	27	0.0879479	0.110656	GO:0001228	GO:MF	DNA-binding transcription activator activity, RNA polymerase II-specific	10566	185
0.000150966	248	307	27	0.0879479	0.108871	GO:0001216	GO:MF	DNA-binding transcription activator activity	10566	179

## Sheet: maze_5hr_KCl
Supplemental Table 5. Significant Gene Ontology terms for all datasets.
SPLICING
p_value	term_size	query_size	intersection_size	precision	recall	term_id	source	term_name	effective_domain_size	source_order
1.20454e-07	619	852	101	0.118545	0.163166	GO:0099536	GO:BP	synaptic signaling	10554	20016
1.38808e-06	591	852	95	0.111502	0.160745	GO:0099537	GO:BP	trans-synaptic signaling	10554	20017
2.01093e-06	586	852	94	0.110329	0.16041	GO:0098916	GO:BP	anterograde trans-synaptic signaling	10554	19849
2.01093e-06	586	852	94	0.110329	0.16041	GO:0007268	GO:BP	chemical synaptic transmission	10554	2847
0.000474812	458	852	73	0.0856808	0.159389	GO:0050804	GO:BP	modulation of chemical synaptic transmission	10554	13928
0.000522087	459	852	73	0.0856808	0.159041	GO:0099177	GO:BP	regulation of trans-synaptic signaling	10554	19986
0.000887613	447	852	71	0.0833333	0.158837	GO:0050808	GO:BP	synapse organization	10554	13932
0.0014577	944	852	123	0.144366	0.130297	GO:0048666	GO:BP	neuron development	10554	13576
0.00252134	3614	852	364	0.42723	0.100719	GO:0032502	GO:BP	developmental process	10554	7976
0.00266424	596	852	86	0.100939	0.144295	GO:0034330	GO:BP	cell junction organization	10554	8964
0.00318301	1149	852	142	0.166667	0.123586	GO:0048699	GO:BP	generation of neurons	10554	13608
0.00395315	6053	852	561	0.658451	0.0926813	GO:0050794	GO:BP	regulation of cellular process	10554	13920
0.00592841	2824	852	294	0.34507	0.104108	GO:0007275	GO:BP	multicellular organism development	10554	2853
0.00599498	3369	852	341	0.400235	0.101217	GO:0048856	GO:BP	anatomical structure development	10554	13752
0.0069133	1061	852	132	0.15493	0.124411	GO:0007267	GO:BP	cell-cell signaling	10554	2846
0.00714807	3199	852	326	0.382629	0.101907	GO:0007154	GO:BP	cell communication	10554	2765
0.0144196	1095	852	134	0.157277	0.122374	GO:0030182	GO:BP	neuron differentiation	10554	7014
0.0151905	2429	852	257	0.301643	0.105805	GO:0048731	GO:BP	system development	10554	13640
0.0172292	6320	852	578	0.678404	0.0914557	GO:0050789	GO:BP	regulation of biological process	10554	13916
0.01751	4127	852	402	0.471831	0.0974073	GO:0016043	GO:BP	cellular component organization	10554	5163
0.0211884	750	852	99	0.116197	0.132	GO:0000902	GO:BP	cell morphogenesis	10554	246
0.0282879	6531	852	593	0.696009	0.0907977	GO:0065007	GO:BP	biological regulation	10554	16682
0.0342307	857	852	109	0.127934	0.127188	GO:0031175	GO:BP	neuron projection development	10554	7422
0.040297	1689	852	188	0.220657	0.111308	GO:0007399	GO:BP	nervous system development	10554	2951
0.0409164	220	852	40	0.0469484	0.181818	GO:0018105	GO:BP	peptidyl-serine phosphorylation	10554	5449
0.0473296	1296	852	151	0.17723	0.116512	GO:0022008	GO:BP	neurogenesis	10554	6877
0.000998981	349	857	60	0.0700117	0.17192	GO:0004672	GO:MF	protein kinase activity	10486	976
0.00467797	272	857	49	0.0571762	0.180147	GO:0004674	GO:MF	protein serine/threonine kinase activity	10486	978
0.00538895	426	857	67	0.0781797	0.157277	GO:0016773	GO:MF	phosphotransferase activity, alcohol group as acceptor	10486	2980
0.00946789	459	857	70	0.0816803	0.152505	GO:0016301	GO:MF	kinase activity	10486	2774
0.0118697	5609	857	529	0.61727	0.0943127	GO:0005515	GO:MF	protein binding	10486	1495
0.0417378	551	857	78	0.0910152	0.141561	GO:0019904	GO:MF	protein domain specific binding	10486	3755
EXPRESSION
p_value	term_size	query_size	intersection_size	precision	recall	term_id	source	term_name	effective_domain_size	source_order
0.0306986	1094	706	114	0.161473	0.104205	GO:0009888	GO:BP	tissue development	10554	3806
0.00234007	125	706	27	0.0382436	0.216	GO:0030546	GO:MF	signaling receptor activator activity	10486	3963
0.0038849	120	706	26	0.0368272	0.216667	GO:0048018	GO:MF	receptor ligand activity	10486	7297
0.0170517	137	706	27	0.0382436	0.19708	GO:0030545	GO:MF	signaling receptor regulator activity	10486	3962

## Sheet: xu_2hr_KCl
Supplemental Table 5. Significant Gene Ontology terms for all datasets.
SPLICING
p_value	term_size	query_size	intersection_size	precision	recall	term_id	source	term_name	effective_domain_size	source_order
0.0473734	724	1225	125	0.102041	0.172652	GO:0001067	GO:MF	transcription regulatory region nucleic acid binding	10702	151
EXPRESSION
p_value	term_size	query_size	intersection_size	precision	recall	term_id	source	term_name	effective_domain_size	source_order
0.000353178	1425	262	69	0.263359	0.0484211	GO:0006357	GO:BP	regulation of transcription by RNA polymerase II	10779	2167
0.00079014	1484	262	70	0.267176	0.0471698	GO:0006366	GO:BP	transcription by RNA polymerase II	10779	2174
0.00167666	1964	262	84	0.320611	0.0427699	GO:0006351	GO:BP	DNA-templated transcription	10779	2161
0.0023028	1878	262	81	0.30916	0.043131	GO:0006355	GO:BP	regulation of DNA-templated transcription	10779	2165
0.00294871	1988	262	84	0.320611	0.0422535	GO:0032774	GO:BP	RNA biosynthetic process	10779	8184
0.00314182	1891	262	81	0.30916	0.0428345	GO:2001141	GO:BP	regulation of RNA biosynthetic process	10779	27454
0.0069759	2650	262	102	0.389313	0.0384906	GO:0016070	GO:BP	RNA metabolic process	10779	5184
0.00918447	2106	262	86	0.328244	0.0408357	GO:0051252	GO:BP	regulation of RNA metabolic process	10779	14280
0.0116227	638	262	38	0.145038	0.0595611	GO:0000122	GO:BP	negative regulation of transcription by RNA polymerase II	10779	51
1.53714e-16	595	285	62	0.217544	0.104202	GO:0000987	GO:MF	cis-regulatory region sequence-specific DNA binding	10702	120
1.01146e-15	579	285	60	0.210526	0.103627	GO:0000978	GO:MF	RNA polymerase II cis-regulatory region sequence-specific DNA binding	10702	117
1.60084e-15	762	285	69	0.242105	0.0905512	GO:1990837	GO:MF	sequence-specific double-stranded DNA binding	10702	11191
1.76827e-15	643	285	63	0.221053	0.0979782	GO:0000977	GO:MF	RNA polymerase II transcription regulatory region sequence-specific DNA binding	10702	116
1.98244e-15	724	285	67	0.235088	0.0925414	GO:0001067	GO:MF	transcription regulatory region nucleic acid binding	10702	151
6.24578e-15	719	285	66	0.231579	0.0917942	GO:0000976	GO:MF	transcription cis-regulatory region binding	10702	115
1.84071e-14	839	285	71	0.249123	0.0846246	GO:0043565	GO:MF	sequence-specific DNA binding	10702	5815
7.45728e-14	817	285	69	0.242105	0.0844553	GO:0003690	GO:MF	double-stranded DNA binding	10702	332
1.65487e-11	583	285	54	0.189474	0.0926244	GO:0003700	GO:MF	DNA-binding transcription factor activity	10702	338
3.58722e-11	1107	285	77	0.270175	0.0695574	GO:0003677	GO:MF	DNA binding	10702	324
6.64086e-11	542	285	51	0.178947	0.0940959	GO:0000981	GO:MF	DNA-binding transcription factor activity, RNA polymerase II-specific	10702	119
6.65121e-07	921	285	61	0.214035	0.0662324	GO:0140110	GO:MF	transcription regulator activity	10702	10515
7.28298e-05	1756	285	87	0.305263	0.0495444	GO:0003676	GO:MF	nucleic acid binding	10702	323
0.0178733	200	285	20	0.0701754	0.1	GO:0001227	GO:MF	DNA-binding transcription repressor activity, RNA polymerase II-specific	10702	184
0.0227394	203	285	20	0.0701754	0.0985222	GO:0001217	GO:MF	DNA-binding transcription repressor activity	10702	180

## Sheet: xu_6hr_KCl
Supplemental Table 5. Significant Gene Ontology terms for all datasets.
SPLICING
p_value	term_size	query_size	intersection_size	precision	recall	term_id	source	term_name	effective_domain_size	source_order
0.000353178	1425	262	69	0.263359	0.0484211	GO:0006357	GO:BP	regulation of transcription by RNA polymerase II	10779	2167
0.00079014	1484	262	70	0.267176	0.0471698	GO:0006366	GO:BP	transcription by RNA polymerase II	10779	2174
0.00167666	1964	262	84	0.320611	0.0427699	GO:0006351	GO:BP	DNA-templated transcription	10779	2161
0.0023028	1878	262	81	0.30916	0.043131	GO:0006355	GO:BP	regulation of DNA-templated transcription	10779	2165
0.00294871	1988	262	84	0.320611	0.0422535	GO:0032774	GO:BP	RNA biosynthetic process	10779	8184
0.00314182	1891	262	81	0.30916	0.0428345	GO:2001141	GO:BP	regulation of RNA biosynthetic process	10779	27454
0.0069759	2650	262	102	0.389313	0.0384906	GO:0016070	GO:BP	RNA metabolic process	10779	5184
0.00918447	2106	262	86	0.328244	0.0408357	GO:0051252	GO:BP	regulation of RNA metabolic process	10779	14280
0.0116227	638	262	38	0.145038	0.0595611	GO:0000122	GO:BP	negative regulation of transcription by RNA polymerase II	10779	51
1.53714e-16	595	285	62	0.217544	0.104202	GO:0000987	GO:MF	cis-regulatory region sequence-specific DNA binding	10702	120
1.01146e-15	579	285	60	0.210526	0.103627	GO:0000978	GO:MF	RNA polymerase II cis-regulatory region sequence-specific DNA binding	10702	117
1.60084e-15	762	285	69	0.242105	0.0905512	GO:1990837	GO:MF	sequence-specific double-stranded DNA binding	10702	11191
1.76827e-15	643	285	63	0.221053	0.0979782	GO:0000977	GO:MF	RNA polymerase II transcription regulatory region sequence-specific DNA binding	10702	116
1.98244e-15	724	285	67	0.235088	0.0925414	GO:0001067	GO:MF	transcription regulatory region nucleic acid binding	10702	151
6.24578e-15	719	285	66	0.231579	0.0917942	GO:0000976	GO:MF	transcription cis-regulatory region binding	10702	115
1.84071e-14	839	285	71	0.249123	0.0846246	GO:0043565	GO:MF	sequence-specific DNA binding	10702	5815
7.45728e-14	817	285	69	0.242105	0.0844553	GO:0003690	GO:MF	double-stranded DNA binding	10702	332
1.65487e-11	583	285	54	0.189474	0.0926244	GO:0003700	GO:MF	DNA-binding transcription factor activity	10702	338
3.58722e-11	1107	285	77	0.270175	0.0695574	GO:0003677	GO:MF	DNA binding	10702	324
6.64086e-11	542	285	51	0.178947	0.0940959	GO:0000981	GO:MF	DNA-binding transcription factor activity, RNA polymerase II-specific	10702	119
6.65121e-07	921	285	61	0.214035	0.0662324	GO:0140110	GO:MF	transcription regulator activity	10702	10515
7.28298e-05	1756	285	87	0.305263	0.0495444	GO:0003676	GO:MF	nucleic acid binding	10702	323
0.0178733	200	285	20	0.0701754	0.1	GO:0001227	GO:MF	DNA-binding transcription repressor activity, RNA polymerase II-specific	10702	184
0.0227394	203	285	20	0.0701754	0.0985222	GO:0001217	GO:MF	DNA-binding transcription repressor activity	10702	180
EXPRESSION
p_value	term_size	query_size	intersection_size	precision	recall	term_id	source	term_name	effective_domain_size	source_order
NO ENRICHED TERMS

## Sheet: quesnel-vallieres_30min_KCl
Supplemental Table 5. Significant Gene Ontology terms for all datasets.
SPLICING
p_value	term_size	query_size	intersection_size	precision	recall	term_id	source	term_name	effective_domain_size	source_order
NO ENRICHED TERMS
EXPRESSION
p_value	term_size	query_size	intersection_size	precision	recall	term_id	source	term_name	effective_domain_size	source_order
4.4443e-07	820	22	14	0.636364	0.0170732	GO:0045944	GO:BP	positive regulation of transcription by RNA polymerase II	11940	12354
1.78891e-05	1079	22	14	0.636364	0.012975	GO:0045893	GO:BP	positive regulation of DNA-templated transcription	11940	12308
1.95017e-05	1086	22	14	0.636364	0.0128913	GO:1902680	GO:BP	positive regulation of RNA biosynthetic process	11940	23342
6.73098e-05	1192	22	14	0.636364	0.011745	GO:0051254	GO:BP	positive regulation of RNA metabolic process	11940	14282
0.000383158	1360	22	14	0.636364	0.0102941	GO:0045935	GO:BP	positive regulation of nucleobase-containing compound metabolic process	11940	12346
0.0017663	53	22	5	0.227273	0.0943396	GO:0035914	GO:BP	skeletal muscle cell differentiation	11940	9783
0.0019722	1542	22	14	0.636364	0.00907912	GO:0006357	GO:BP	regulation of transcription by RNA polymerase II	11940	2167
0.0032064	1601	22	14	0.636364	0.00874453	GO:0006366	GO:BP	transcription by RNA polymerase II	11940	2174
0.00388536	1625	22	14	0.636364	0.00861538	GO:0010557	GO:BP	positive regulation of macromolecule biosynthetic process	11940	4281
0.00638794	1689	22	14	0.636364	0.00828893	GO:0031328	GO:BP	positive regulation of cellular biosynthetic process	11940	7466
0.00742985	1709	22	14	0.636364	0.00819193	GO:0009891	GO:BP	positive regulation of biosynthetic process	11940	3809
4.97096e-09	290	19	11	0.578947	0.037931	GO:0001228	GO:MF	DNA-binding transcription activator activity, RNA polymerase II-specific	11848	185
6.00013e-09	295	19	11	0.578947	0.0372881	GO:0001216	GO:MF	DNA-binding transcription activator activity	11848	179
7.09601e-07	622	19	12	0.631579	0.0192926	GO:0000981	GO:MF	DNA-binding transcription factor activity, RNA polymerase II-specific	11848	119
1.55489e-06	665	19	12	0.631579	0.0180451	GO:0003700	GO:MF	DNA-binding transcription factor activity	11848	338
2.08977e-06	682	19	12	0.631579	0.0175953	GO:0000978	GO:MF	RNA polymerase II cis-regulatory region sequence-specific DNA binding	11848	117
2.78739e-06	699	19	12	0.631579	0.0171674	GO:0000987	GO:MF	cis-regulatory region sequence-specific DNA binding	11848	120
6.64436e-06	753	19	12	0.631579	0.0159363	GO:0000977	GO:MF	RNA polymerase II transcription regulatory region sequence-specific DNA binding	11848	116
2.08972e-05	831	19	12	0.631579	0.0144404	GO:0000976	GO:MF	transcription cis-regulatory region binding	11848	115
2.24024e-05	836	19	12	0.631579	0.0143541	GO:0001067	GO:MF	transcription regulatory region nucleic acid binding	11848	151
3.84877e-05	876	19	12	0.631579	0.0136986	GO:1990837	GO:MF	sequence-specific double-stranded DNA binding	11848	11191
8.26891e-05	936	19	12	0.631579	0.0128205	GO:0003690	GO:MF	double-stranded DNA binding	11848	332
0.000101735	953	19	12	0.631579	0.0125918	GO:0043565	GO:MF	sequence-specific DNA binding	11848	5815
0.00022707	1022	19	12	0.631579	0.0117417	GO:0140110	GO:MF	transcription regulator activity	11848	10515
0.0020716	1241	19	12	0.631579	0.00966962	GO:0003677	GO:MF	DNA binding	11848	324
0.0269109	1923	19	13	0.684211	0.00676027	GO:0003676	GO:MF	nucleic acid binding	11848	323

## Sheet: quesnel-vallieres_3hr_KCl
Supplemental Table 5. Significant Gene Ontology terms for all datasets.
SPLICING
p_value	term_size	query_size	intersection_size	precision	recall	term_id	source	term_name	effective_domain_size	source_order
5.83728e-08	1033	1503	209	0.139055	0.202323	GO:0007010	GO:BP	cytoskeleton organization	11748	2665
1.12514e-06	4461	1503	688	0.457751	0.154226	GO:0016043	GO:BP	cellular component organization	11748	5163
0.000128967	4623	1503	696	0.463074	0.150552	GO:0071840	GO:BP	cellular component organization or biogenesis	11748	17759
0.000902271	813	1503	158	0.105123	0.194342	GO:0045944	GO:BP	positive regulation of transcription by RNA polymerase II	11748	12354
0.00245042	603	1503	123	0.0818363	0.20398	GO:0120035	GO:BP	regulation of plasma membrane bounded cell projection organization	11748	20387
0.00264517	610	1503	124	0.0825017	0.203279	GO:0031344	GO:BP	regulation of cell projection organization	11748	7481
0.00574614	1072	1503	194	0.129075	0.18097	GO:0045893	GO:BP	positive regulation of DNA-templated transcription	11748	12308
0.00653669	785	1503	150	0.0998004	0.191083	GO:0000902	GO:BP	cell morphogenesis	11748	246
0.00673122	2491	1503	397	0.264138	0.159374	GO:0019219	GO:BP	regulation of nucleobase-containing compound metabolic process	11748	5852
0.00742444	1922	1503	317	0.210912	0.164932	GO:0051128	GO:BP	regulation of cellular component organization	11748	14186
0.00770758	1958	1503	322	0.214238	0.164454	GO:0048468	GO:BP	cell development	11748	13419
0.00834205	1533	1503	261	0.173653	0.170254	GO:0006357	GO:BP	regulation of transcription by RNA polymerase II	11748	2167
0.00937833	1079	1503	194	0.129075	0.179796	GO:1902680	GO:BP	positive regulation of RNA biosynthetic process	11748	23342
0.00987187	518	1503	107	0.071191	0.206564	GO:0000226	GO:BP	microtubule cytoskeleton organization	11748	65
0.0102738	1592	1503	269	0.178975	0.16897	GO:0006366	GO:BP	transcription by RNA polymerase II	11748	2174
0.0131092	1348	1503	233	0.155023	0.172849	GO:0045935	GO:BP	positive regulation of nucleobase-containing compound metabolic process	11748	12346
0.0146696	1302	1503	226	0.150366	0.173579	GO:0030030	GO:BP	cell projection organization	11748	6969
0.018387	1292	1503	224	0.149035	0.173375	GO:0120036	GO:BP	plasma membrane bounded cell projection organization	11748	20388
0.0376735	2261	1503	360	0.239521	0.159222	GO:0051252	GO:BP	regulation of RNA metabolic process	11748	14280
0.0395725	551	1503	110	0.073187	0.199637	GO:0097435	GO:BP	supramolecular fiber organization	11748	19546
0.000891023	245	1511	64	0.0423561	0.261224	GO:0051020	GO:MF	GTPase binding	11639	7989
0.00150925	211	1511	57	0.0377234	0.270142	GO:0031267	GO:MF	small GTPase binding	11639	4133
0.00667443	667	1511	133	0.0880212	0.1994	GO:0008092	GO:MF	cytoskeletal protein binding	11639	1547
0.00711027	6099	1511	885	0.585705	0.145106	GO:0005515	GO:MF	protein binding	11639	1495
0.0318465	498	1511	103	0.0681668	0.206827	GO:0016301	GO:MF	kinase activity	11639	2774
EXPRESSION
p_value	term_size	query_size	intersection_size	precision	recall	term_id	source	term_name	effective_domain_size	source_order
0.00204867	4188	163	92	0.564417	0.0219675	GO:0048518	GO:BP	positive regulation of biological process	11748	13451
0.00376659	3705	163	84	0.515337	0.0226721	GO:0048856	GO:BP	anatomical structure development	11748	13752
0.00649558	7131	163	130	0.797546	0.0182303	GO:0065007	GO:BP	biological regulation	11748	16682
0.00833496	6904	163	127	0.779141	0.0183951	GO:0050789	GO:BP	regulation of biological process	11748	13916
0.022083	3975	163	86	0.527607	0.0216352	GO:0032502	GO:BP	developmental process	11748	7976
0.00212566	283	156	18	0.115385	0.0636042	GO:0001228	GO:MF	DNA-binding transcription activator activity, RNA polymerase II-specific	11639	185
0.00277838	288	156	18	0.115385	0.0625	GO:0001216	GO:MF	DNA-binding transcription activator activity	11639	179
0.0496481	676	156	26	0.166667	0.0384615	GO:0000987	GO:MF	cis-regulatory region sequence-specific DNA binding	11639	120

[truncated: 2 more sheets: calderon_1hr_KCl, calderon_6hr_KCl]
