# Supplementary material for: Meta-analysis of activated neurons reveals dynamic regulation of diverse classes of alternative splicing
Source: HighWire-hosted journal article supplement (doi:10.1101/gr.280082.124), 2025-04-24
Supplement: supplemental_table_6_kmer_enrichments.xlsx [file supplemental_table_6_kmer_enrichments.xlsx]

## Sheet: gc_matched
Supplemental Table 6. Enrichment of k-mers near KCl-dependent and control exons.
kmer	zscore	fe_p	oddsratio	region	direction	set	time	zscore_shuffle	fe_p_shuffle	oddsratio_shuffle	region_shuffle	direction_shuffle	set_shuffle	time_shuffle
GGGTGG	9.92532	2.43613	11.131	3ssExonicRegion	Exclusion	kcl.gc	early	1.64045	0.532699	1.85912	3ssExonicRegion	Exclusion	shuffle.gc	early
TCAAGG	8.30152	2.587	6.98007	3ssExonicRegion	Exclusion	kcl.gc	early	0.249234	0.0909339	1.15579	3ssExonicRegion	Exclusion	shuffle.gc	early
TGGGGG	8.30152	2.587	6.98007	3ssExonicRegion	Exclusion	kcl.gc	early	-0.722067	0.0897518	0.817486	3ssExonicRegion	Exclusion	shuffle.gc	early
TCCCCG	8.01691	1.9109	9.24399	3ssExonicRegion	Exclusion	kcl.gc	early	0.281934	0.113087	1.23267	3ssExonicRegion	Exclusion	shuffle.gc	early
CTCTCG	7.06271	1.39614	7.36986	3ssExonicRegion	Exclusion	kcl.gc	early	2.67366	0.659226	2.4097	3ssExonicRegion	Exclusion	shuffle.gc	early
ATCACA	6.95205	2.10112	6.0285	3ssExonicRegion	Exclusion	kcl.gc	early	1.92107	0.639811	1.89713	3ssExonicRegion	Exclusion	shuffle.gc	early
ATGTGG	6.72412	2.31169	4.96296	3ssExonicRegion	Exclusion	kcl.gc	early	1.59346	0.403199	1.49224	3ssExonicRegion	Exclusion	shuffle.gc	early
CTCCTT	6.19836	1.61885	2.94561	3ssExonicRegion	Exclusion	kcl.gc	early	-2.49345	0.647409	0.569685	3ssExonicRegion	Exclusion	shuffle.gc	early
CCATGT	6.17319	2.08627	4.64471	3ssExonicRegion	Exclusion	kcl.gc	early	-2.20767	0.933852	0.368239	3ssExonicRegion	Exclusion	shuffle.gc	early
GCCATA	6.1085	1.39614	7.36986	3ssExonicRegion	Exclusion	kcl.gc	early	0.919887	0.299975	1.71498	3ssExonicRegion	Exclusion	shuffle.gc	early
CGGTGC	6.1085	1.39614	7.36986	3ssExonicRegion	Exclusion	kcl.gc	early	-1.65661	0.466049	0.436307	3ssExonicRegion	Exclusion	shuffle.gc	early
GAAGGT	5.80877	2.00128	3.26708	3ssExonicRegion	Exclusion	kcl.gc	early	-2.56388	1.13812	0.447683	3ssExonicRegion	Exclusion	shuffle.gc	early
CGGGAG	5.07132	1.64649	4.01151	3ssExonicRegion	Exclusion	kcl.gc	early	-1.36253	0.345059	0.610889	3ssExonicRegion	Exclusion	shuffle.gc	early
CCTGTG	4.96438	1.77654	2.683	3ssExonicRegion	Exclusion	kcl.gc	early	-1.16973	0.227528	0.792101	3ssExonicRegion	Exclusion	shuffle.gc	early
AATGGT	4.92783	1.39742	4.6134	3ssExonicRegion	Exclusion	kcl.gc	early	-1.54086	0.413907	0.509042	3ssExonicRegion	Exclusion	shuffle.gc	early
AACTGC	4.92783	1.39742	4.6134	3ssExonicRegion	Exclusion	kcl.gc	early	1.18761	0.380959	1.64954	3ssExonicRegion	Exclusion	shuffle.gc	early
TTGGTA	4.92783	1.39742	4.6134	3ssExonicRegion	Exclusion	kcl.gc	early	-0.891142	0.111587	0.729814	3ssExonicRegion	Exclusion	shuffle.gc	early
AGTGCC	4.69798	1.73482	3.15757	3ssExonicRegion	Exclusion	kcl.gc	early	-0.644842	0.0806913	0.851615	3ssExonicRegion	Exclusion	shuffle.gc	early
CTTCAC	4.69798	1.89057	3.71528	3ssExonicRegion	Exclusion	kcl.gc	early	-0.986326	0.202825	0.714	3ssExonicRegion	Exclusion	shuffle.gc	early
TCCTTC	4.62697	1.60232	2.56184	3ssExonicRegion	Exclusion	kcl.gc	early	-2.26697	0.879837	0.531127	3ssExonicRegion	Exclusion	shuffle.gc	early
TGTGGT	4.52039	1.43304	3.69655	3ssExonicRegion	Exclusion	kcl.gc	early	1.02252	0.20571	1.32325	3ssExonicRegion	Exclusion	shuffle.gc	early
GGGCTT	4.52039	1.43304	3.69655	3ssExonicRegion	Exclusion	kcl.gc	early	1.50768	0.490176	1.72151	3ssExonicRegion	Exclusion	shuffle.gc	early
TGAGGT	4.34506	1.48416	3.23962	3ssExonicRegion	Exclusion	kcl.gc	early	2.74785	0.964894	2.25031	3ssExonicRegion	Exclusion	shuffle.gc	early
ACAAAA	4.27121	1.54337	2.96667	3ssExonicRegion	Exclusion	kcl.gc	early	-1.08054	0.256996	0.746764	3ssExonicRegion	Exclusion	shuffle.gc	early
AGGTGG	4.26042	1.51901	2.65734	3ssExonicRegion	Exclusion	kcl.gc	early	2.60611	0.943046	1.96584	3ssExonicRegion	Exclusion	shuffle.gc	early
GTGGCT	4.07929	1.60355	2.33245	3ssExonicRegion	Exclusion	kcl.gc	early	1.27289	0.405606	1.38051	3ssExonicRegion	Exclusion	shuffle.gc	early
TGTGGG	4.07929	1.60355	2.33245	3ssExonicRegion	Exclusion	kcl.gc	early	-0.266072	0	0.963793	3ssExonicRegion	Exclusion	shuffle.gc	early
AAGGTG	4.01304	1.51878	2.38039	3ssExonicRegion	Exclusion	kcl.gc	early	-2.26697	1.02208	0.503656	3ssExonicRegion	Exclusion	shuffle.gc	early
GCCTCC	3.94533	1.61561	2.18026	3ssExonicRegion	Exclusion	kcl.gc	early	0.94088	0.282859	1.26334	3ssExonicRegion	Exclusion	shuffle.gc	early
CCCATG	3.84445	1.35664	2.77643	3ssExonicRegion	Exclusion	kcl.gc	early	0.965272	0.305309	1.41781	3ssExonicRegion	Exclusion	shuffle.gc	early
TTCTCA	3.84445	1.35664	2.77643	3ssExonicRegion	Exclusion	kcl.gc	early	0.91836	0.288172	1.37492	3ssExonicRegion	Exclusion	shuffle.gc	early
GGTGAT	3.84445	1.35664	2.77643	3ssExonicRegion	Exclusion	kcl.gc	early	2.55345	0.899255	2.07735	3ssExonicRegion	Exclusion	shuffle.gc	early
GGAGCT	3.66982	1.53093	2.20495	3ssExonicRegion	Exclusion	kcl.gc	early	-1.71906	0.413963	0.710313	3ssExonicRegion	Exclusion	shuffle.gc	early
GCTGGC	3.49989	1.61561	2.18026	3ssExonicRegion	Exclusion	kcl.gc	early	1.49189	0.392118	1.35903	3ssExonicRegion	Exclusion	shuffle.gc	early
AGTACC	3.41853	1.39742	4.6134	3ssExonicRegion	Exclusion	kcl.gc	early	1.18761	0.240613	1.44073	3ssExonicRegion	Exclusion	shuffle.gc	early
TGGGCC	13.1818	3.30758	14.7908	3ssExonicRegion	Exclusion	kcl.gc	late	1.21777	0.383467	1.66871	3ssExonicRegion	Exclusion	shuffle.gc	late
GTGCGG	9.26378	2.20855	10.7609	3ssExonicRegion	Exclusion	kcl.gc	late	0.294972	0.104637	1.2119	3ssExonicRegion	Exclusion	shuffle.gc	late
CTGTTT	9.26378	2.20855	10.7609	3ssExonicRegion	Exclusion	kcl.gc	late	-1.75981	0.577201	0.456164	3ssExonicRegion	Exclusion	shuffle.gc	late
GCCTTG	9.25953	3.34563	6.61301	3ssExonicRegion	Exclusion	kcl.gc	late	-1.14248	0.283718	0.712169	3ssExonicRegion	Exclusion	shuffle.gc	late
GCAACT	8.28428	1.94007	9.76331	3ssExonicRegion	Exclusion	kcl.gc	late	0.307206	0.113742	1.24644	3ssExonicRegion	Exclusion	shuffle.gc	late
AGGGGG	8.28428	1.94007	9.76331	3ssExonicRegion	Exclusion	kcl.gc	late	1.85271	0.591103	2.08998	3ssExonicRegion	Exclusion	shuffle.gc	late
TGTTTG	7.90654	2.39528	6.87475	3ssExonicRegion	Exclusion	kcl.gc	late	-0.741683	0.0955244	0.803175	3ssExonicRegion	Exclusion	shuffle.gc	late
CGATGA	7.30478	1.67486	8.76969	3ssExonicRegion	Exclusion	kcl.gc	late	0.32567	0.125623	1.29827	3ssExonicRegion	Exclusion	shuffle.gc	late
GACCAA	7.30478	1.67486	8.76969	3ssExonicRegion	Exclusion	kcl.gc	late	0.762491	0.242112	1.45714	3ssExonicRegion	Exclusion	shuffle.gc	late
GACATC	7.30478	1.67486	8.76969	3ssExonicRegion	Exclusion	kcl.gc	late	-0.183344	0	1.03651	3ssExonicRegion	Exclusion	shuffle.gc	late
GTAGCT	7.21391	2.14545	6.37103	3ssExonicRegion	Exclusion	kcl.gc	late	-0.402308	0	0.919791	3ssExonicRegion	Exclusion	shuffle.gc	late
GGGCCT	7.01886	2.6118	4.69277	3ssExonicRegion	Exclusion	kcl.gc	late	-1.49331	0.448348	0.59881	3ssExonicRegion	Exclusion	shuffle.gc	late
GCTTCA	6.43185	2.13948	4.91036	3ssExonicRegion	Exclusion	kcl.gc	late	0.280625	0.0914316	1.1688	3ssExonicRegion	Exclusion	shuffle.gc	late
AGGGTA	6.32528	1.4135	7.77996	3ssExonicRegion	Exclusion	kcl.gc	late	-1.36752	0.295433	0.515182	3ssExonicRegion	Exclusion	shuffle.gc	late
AGCGTG	6.32528	1.4135	7.77996	3ssExonicRegion	Exclusion	kcl.gc	late	0.834683	0.267437	1.5611	3ssExonicRegion	Exclusion	shuffle.gc	late
CTGTCG	6.32528	1.4135	7.77996	3ssExonicRegion	Exclusion	kcl.gc	late	-0.148078	0	1.03659	3ssExonicRegion	Exclusion	shuffle.gc	late
TGTTAG	6.32528	1.4135	7.77996	3ssExonicRegion	Exclusion	kcl.gc	late	-1.36752	0.295433	0.515182	3ssExonicRegion	Exclusion	shuffle.gc	late
TCCATT	6.32528	1.4135	7.77996	3ssExonicRegion	Exclusion	kcl.gc	late	0.834683	0.476764	2.08554	3ssExonicRegion	Exclusion	shuffle.gc	late
ATAGTG	6.32528	1.4135	7.77996	3ssExonicRegion	Exclusion	kcl.gc	late	-0.148078	0	1.03659	3ssExonicRegion	Exclusion	shuffle.gc	late
CAAGCT	6.25943	2.41651	3.95171	3ssExonicRegion	Exclusion	kcl.gc	late	-0.819302	0.162719	0.809965	3ssExonicRegion	Exclusion	shuffle.gc	late
AGCTGT	5.99957	2.51311	3.40075	3ssExonicRegion	Exclusion	kcl.gc	late	-0.00290626	0	1.03727	3ssExonicRegion	Exclusion	shuffle.gc	late
TGCAGT	5.82866	1.42084	4.87179	3ssExonicRegion	Exclusion	kcl.gc	late	0.710596	0.104637	1.2119	3ssExonicRegion	Exclusion	shuffle.gc	late
ATTCCA	5.82866	1.65768	5.36957	3ssExonicRegion	Exclusion	kcl.gc	late	0.307206	0.113742	1.24644	3ssExonicRegion	Exclusion	shuffle.gc	late
GGGTGA	5.13604	1.42084	4.87179	3ssExonicRegion	Exclusion	kcl.gc	late	0.294972	0.104637	1.2119	3ssExonicRegion	Exclusion	shuffle.gc	late
CCGTCC	5.13604	1.42084	4.87179	3ssExonicRegion	Exclusion	kcl.gc	late	-0.867856	0.11154	0.737515	3ssExonicRegion	Exclusion	shuffle.gc	late
GGACTA	5.13604	1.42084	4.87179	3ssExonicRegion	Exclusion	kcl.gc	late	-0.536276	0	0.862127	3ssExonicRegion	Exclusion	shuffle.gc	late
GGCTTC	5.05974	1.73061	3.6753	3ssExonicRegion	Exclusion	kcl.gc	late	-0.692383	0.0896963	0.826176	3ssExonicRegion	Exclusion	shuffle.gc	late
AGGTGG	4.94519	1.58938	3.13613	3ssExonicRegion	Exclusion	kcl.gc	late	0.273515	0	1.03696	3ssExonicRegion	Exclusion	shuffle.gc	late
TAGCTG	4.73523	1.46327	3.90495	3ssExonicRegion	Exclusion	kcl.gc	late	2.36172	0.769553	2.35605	3ssExonicRegion	Exclusion	shuffle.gc	late
CAGGAG	4.61058	1.89632	2.63421	3ssExonicRegion	Exclusion	kcl.gc	late	0.269291	0.0675111	1.1088	3ssExonicRegion	Exclusion	shuffle.gc	late
TGGCCT	4.50711	1.58938	3.13613	3ssExonicRegion	Exclusion	kcl.gc	late	-0.342456	0	0.940825	3ssExonicRegion	Exclusion	shuffle.gc	late
CTGTGC	4.28403	1.55171	2.40494	3ssExonicRegion	Exclusion	kcl.gc	late	0.269642	0	1.03742	3ssExonicRegion	Exclusion	shuffle.gc	late
CTGGTG	4.28403	1.72172	2.51934	3ssExonicRegion	Exclusion	kcl.gc	late	-0.23949	0	0.970565	3ssExonicRegion	Exclusion	shuffle.gc	late
GTGGGC	4.08018	1.31885	3.17262	3ssExonicRegion	Exclusion	kcl.gc	late	-0.402308	0	0.919791	3ssExonicRegion	Exclusion	shuffle.gc	late
AAAACC	4.08018	1.31885	3.17262	3ssExonicRegion	Exclusion	kcl.gc	late	-0.0982548	0	1.03673	3ssExonicRegion	Exclusion	shuffle.gc	late
CTCAAG	4.08018	1.46327	3.90495	3ssExonicRegion	Exclusion	kcl.gc	late	2.78871	0.64426	1.9201	3ssExonicRegion	Exclusion	shuffle.gc	late
TCCTGT	3.86576	1.46494	2.45473	3ssExonicRegion	Exclusion	kcl.gc	late	-0.748622	0.14977	0.837681	3ssExonicRegion	Exclusion	shuffle.gc	late
TCGGAG	13.7419	3.50698	14.9444	3ssIntronicRegion	Exclusion	kcl.gc	early	-0.0942769	0	1.02555	3ssIntronicRegion	Exclusion	shuffle.gc	early
TGCGCA	8.01679	1.9109	9.24399	3ssIntronicRegion	Exclusion	kcl.gc	early	-1.27374	0.26188	0.582795	3ssIntronicRegion	Exclusion	shuffle.gc	early
GAGATG	7.71763	3.83856	2.26339	3ssIntronicRegion	Exclusion	kcl.gc	early	-0.00704211	0.119895	0.925229	3ssIntronicRegion	Exclusion	shuffle.gc	early
CACACA	7.54109	1.38272	1.448	3ssIntronicRegion	Exclusion	kcl.gc	early	7.45513	0.102232	1.06182	3ssIntronicRegion	Exclusion	shuffle.gc	early
TCATCG	6.95183	2.10112	6.0285	3ssIntronicRegion	Exclusion	kcl.gc	early	2.09314	0.694594	2.06947	3ssIntronicRegion	Exclusion	shuffle.gc	early
TACATC	6.41209	2.51006	2.46365	3ssIntronicRegion	Exclusion	kcl.gc	early	0.0228758	0	0.981664	3ssIntronicRegion	Exclusion	shuffle.gc	early
TCGATG	5.62199	1.8644	4.32757	3ssIntronicRegion	Exclusion	kcl.gc	early	0.607182	0.192951	1.28656	3ssIntronicRegion	Exclusion	shuffle.gc	early
ACATCG	5.6024	1.62798	5.08348	3ssIntronicRegion	Exclusion	kcl.gc	early	-2.45681	1.19133	0.225025	3ssIntronicRegion	Exclusion	shuffle.gc	early
GGGGTA	5.42656	1.88055	2.19509	3ssIntronicRegion	Exclusion	kcl.gc	early	0.0315681	0.0527561	0.943859	3ssIntronicRegion	Exclusion	shuffle.gc	early
TGGGGG	5.35028	1.54001	1.45664	3ssIntronicRegion	Exclusion	kcl.gc	early	-0.707816	0.21747	0.913649	3ssIntronicRegion	Exclusion	shuffle.gc	early
CCGTCT	5.29911	1.68714	2.29381	3ssIntronicRegion	Exclusion	kcl.gc	early	2.18976	0.844924	1.66904	3ssIntronicRegion	Exclusion	shuffle.gc	early
AATGGA	5.28916	1.6886	1.72086	3ssIntronicRegion	Exclusion	kcl.gc	early	-0.177185	0.352621	1.18776	3ssIntronicRegion	Exclusion	shuffle.gc	early
CCCGTC	5.28476	1.85522	2.59651	3ssIntronicRegion	Exclusion	kcl.gc	early	0.732138	0.420477	1.40507	3ssIntronicRegion	Exclusion	shuffle.gc	early
ACTCTG	5.27656	2.00145	1.63964	3ssIntronicRegion	Exclusion	kcl.gc	early	2.68499	1.27511	1.44656	3ssIntronicRegion	Exclusion	shuffle.gc	early
AGGAGT	5.25382	1.90095	1.80119	3ssIntronicRegion	Exclusion	kcl.gc	early	2.9336	0.950626	1.44418	3ssIntronicRegion	Exclusion	shuffle.gc	early
ACTCAT	5.23484	2.31307	2.18626	3ssIntronicRegion	Exclusion	kcl.gc	early	-1.47972	0.54981	0.76771	3ssIntronicRegion	Exclusion	shuffle.gc	early
GGAGAT	5.22951	1.67926	1.81412	3ssIntronicRegion	Exclusion	kcl.gc	early	-0.532095	0.203317	0.883337	3ssIntronicRegion	Exclusion	shuffle.gc	early
GGGGAG	5.207	2.08529	1.64846	3ssIntronicRegion	Exclusion	kcl.gc	early	-0.877868	0.44191	0.841223	3ssIntronicRegion	Exclusion	shuffle.gc	early
AGACAC	5.15553	1.47734	1.6051	3ssIntronicRegion	Exclusion	kcl.gc	early	0.676792	0.233123	1.1316	3ssIntronicRegion	Exclusion	shuffle.gc	early
ATCTGA	5.1484	2.45812	1.98221	3ssIntronicRegion	Exclusion	kcl.gc	early	-0.584283	0.127643	1.07721	3ssIntronicRegion	Exclusion	shuffle.gc	early
GCTCGA	5.07109	1.64649	4.01151	3ssIntronicRegion	Exclusion	kcl.gc	early	3.34028	1.14443	2.85577	3ssIntronicRegion	Exclusion	shuffle.gc	early
CGGGGA	5.0114	1.76651	2.43004	3ssIntronicRegion	Exclusion	kcl.gc	early	0.940632	0.0632082	1.08829	3ssIntronicRegion	Exclusion	shuffle.gc	early
GGTAGG	4.93007	2.42146	2.02084	3ssIntronicRegion	Exclusion	kcl.gc	early	2.06543	0.860001	1.41132	3ssIntronicRegion	Exclusion	shuffle.gc	early
GGGGCG	4.82045	1.30936	1.93036	3ssIntronicRegion	Exclusion	kcl.gc	early	-2.76221	1.30038	0.533333	3ssIntronicRegion	Exclusion	shuffle.gc	early
AGATGC	4.77927	2.10869	1.97955	3ssIntronicRegion	Exclusion	kcl.gc	early	0.727976	0.0433719	1.05671	3ssIntronicRegion	Exclusion	shuffle.gc	early
TAATGG	4.77927	1.93238	1.89668	3ssIntronicRegion	Exclusion	kcl.gc	early	-0.542222	0.255452	0.866741	3ssIntronicRegion	Exclusion	shuffle.gc	early
GGGGGC	4.68488	1.39608	1.594	3ssIntronicRegion	Exclusion	kcl.gc	early	-0.964434	0.0829225	0.932693	3ssIntronicRegion	Exclusion	shuffle.gc	early
GGGTAG	4.62388	1.62735	1.84564	3ssIntronicRegion	Exclusion	kcl.gc	early	2.75973	0.703641	1.43362	3ssIntronicRegion	Exclusion	shuffle.gc	early
CTAGCG	4.52018	1.43304	3.69655	3ssIntronicRegion	Exclusion	kcl.gc	early	-2.5126	1.25087	0.275681	3ssIntronicRegion	Exclusion	shuffle.gc	early
AGGAGA	4.51577	1.67666	1.56031	3ssIntronicRegion	Exclusion	kcl.gc	early	0.158381	0.068261	1.04606	3ssIntronicRegion	Exclusion	shuffle.gc	early
ATACCA	4.49552	1.92744	2.34431	3ssIntronicRegion	Exclusion	kcl.gc	early	0.445203	0.119581	1.12805	3ssIntronicRegion	Exclusion	shuffle.gc	early
AGGCAA	4.44569	1.98964	1.84282	3ssIntronicRegion	Exclusion	kcl.gc	early	1.33277	0.83422	1.3921	3ssIntronicRegion	Exclusion	shuffle.gc	early
TAGATG	4.39757	1.93238	1.89668	3ssIntronicRegion	Exclusion	kcl.gc	early	2.91496	1.22333	1.60531	3ssIntronicRegion	Exclusion	shuffle.gc	early
TAGGGG	4.38133	2.22695	2.14361	3ssIntronicRegion	Exclusion	kcl.gc	early	-0.486062	0.159669	0.891541	3ssIntronicRegion	Exclusion	shuffle.gc	early
GGTTGG	4.38034	1.91552	1.72333	3ssIntronicRegion	Exclusion	kcl.gc	early	0.115861	0.170392	0.900703	3ssIntronicRegion	Exclusion	shuffle.gc	early
CGTCTA	4.34479	1.48416	3.23962	3ssIntronicRegion	Exclusion	kcl.gc	early	1.50755	0.490176	1.72151	3ssIntronicRegion	Exclusion	shuffle.gc	early
CTCCTC	4.3043	1.86498	1.45963	3ssIntronicRegion	Exclusion	kcl.gc	early	1.01845	0.262432	1.10409	3ssIntronicRegion	Exclusion	shuffle.gc	early
ACAGGA	4.21422	1.91552	1.72333	3ssIntronicRegion	Exclusion	kcl.gc	early	-1.20708	0.272747	0.864599	3ssIntronicRegion	Exclusion	shuffle.gc	early
GCTACC	4.19466	1.73188	2.12855	3ssIntronicRegion	Exclusion	kcl.gc	early	-0.808472	0.18964	0.848852	3ssIntronicRegion	Exclusion	shuffle.gc	early
TACAGT	4.11713	2.04413	1.82009	3ssIntronicRegion	Exclusion	kcl.gc	early	0.391255	0	0.980838	3ssIntronicRegion	Exclusion	shuffle.gc	early
TGAGGA	4.10158	2.08529	1.64846	3ssIntronicRegion	Exclusion	kcl.gc	early	-1.23561	0.44569	0.838986	3ssIntronicRegion	Exclusion	shuffle.gc	early
AGATGT	4.09384	1.82922	1.66373	3ssIntronicRegion	Exclusion	kcl.gc	early	1.51311	0.322207	1.16471	3ssIntronicRegion	Exclusion	shuffle.gc	early
TGGGCA	4.09373	1.89757	1.57769	3ssIntronicRegion	Exclusion	kcl.gc	early	-0.390256	0.228282	0.904272	3ssIntronicRegion	Exclusion	shuffle.gc	early
ATAGTC	4.02849	1.69907	2.15987	3ssIntronicRegion	Exclusion	kcl.gc	early	0.00850655	0	1.02617	3ssIntronicRegion	Exclusion	shuffle.gc	early
TACCAC	3.95458	1.61991	1.88043	3ssIntronicRegion	Exclusion	kcl.gc	early	-0.650589	0.100414	0.92513	3ssIntronicRegion	Exclusion	shuffle.gc	early
CACTCA	3.95347	1.77469	1.72932	3ssIntronicRegion	Exclusion	kcl.gc	early	-1.12669	0.285445	0.852979	3ssIntronicRegion	Exclusion	shuffle.gc	early
TCACCG	3.95167	1.69766	2.7951	3ssIntronicRegion	Exclusion	kcl.gc	early	1.40131	0.595045	1.60269	3ssIntronicRegion	Exclusion	shuffle.gc	early
GCTGTC	3.93845	1.97754	1.587	3ssIntronicRegion	Exclusion	kcl.gc	early	-2.03765	0.548964	0.820513	3ssIntronicRegion	Exclusion	shuffle.gc	early
TAGCAC	3.934	1.41462	1.74864	3ssIntronicRegion	Exclusion	kcl.gc	early	-0.12806	0.0479671	1.0628	3ssIntronicRegion	Exclusion	shuffle.gc	early
ATGGGA	3.9219	1.88586	1.70239	3ssIntronicRegion	Exclusion	kcl.gc	early	-0.16699	0.0795089	0.939639	3ssIntronicRegion	Exclusion	shuffle.gc	early
CAAAGT	3.92181	1.35218	1.64687	3ssIntronicRegion	Exclusion	kcl.gc	early	-0.229723	0.0422671	0.971965	3ssIntronicRegion	Exclusion	shuffle.gc	early
TCCCAC	3.91028	1.59286	1.56825	3ssIntronicRegion	Exclusion	kcl.gc	early	1.14802	0.153184	1.08613	3ssIntronicRegion	Exclusion	shuffle.gc	early
ACGGAG	3.89931	1.3454	2.52007	3ssIntronicRegion	Exclusion	kcl.gc	early	1.51934	0.499692	1.55258	3ssIntronicRegion	Exclusion	shuffle.gc	early
CTGCCT	3.85732	1.75942	1.41962	3ssIntronicRegion	Exclusion	kcl.gc	early	-1.28968	0.329047	0.899664	3ssIntronicRegion	Exclusion	shuffle.gc	early
AGTGGC	3.84809	1.51758	1.66834	3ssIntronicRegion	Exclusion	kcl.gc	early	0.548863	0.133525	1.08143	3ssIntronicRegion	Exclusion	shuffle.gc	early
CGGATG	3.84415	1.35664	2.77643	3ssIntronicRegion	Exclusion	kcl.gc	early	-1.22931	0.300815	0.67881	3ssIntronicRegion	Exclusion	shuffle.gc	early
ACTGGT	3.83619	1.32581	1.62234	3ssIntronicRegion	Exclusion	kcl.gc	early	0.396189	0.136809	1.08388	3ssIntronicRegion	Exclusion	shuffle.gc	early
TGACTC	3.82337	1.65502	1.6126	3ssIntronicRegion	Exclusion	kcl.gc	early	-0.0103627	0	1.00758	3ssIntronicRegion	Exclusion	shuffle.gc	early
CTTTGC	3.80627	1.65079	1.50633	3ssIntronicRegion	Exclusion	kcl.gc	early	-0.16285	0.100957	1.06119	3ssIntronicRegion	Exclusion	shuffle.gc	early
GGCTGA	3.79583	1.73727	1.62244	3ssIntronicRegion	Exclusion	kcl.gc	early	-0.130227	0	0.987978	3ssIntronicRegion	Exclusion	shuffle.gc	early
CCCAGC	3.72954	1.4179	1.41792	3ssIntronicRegion	Exclusion	kcl.gc	early	0.501897	0.0973424	1.04441	3ssIntronicRegion	Exclusion	shuffle.gc	early
CAGAGA	3.61574	1.65605	1.4904	3ssIntronicRegion	Exclusion	kcl.gc	early	0.0882501	0.0974477	0.94408	3ssIntronicRegion	Exclusion	shuffle.gc	early
GTCTGC	3.58858	1.35526	1.53562	3ssIntronicRegion	Exclusion	kcl.gc	early	0.11814	0.162653	1.09246	3ssIntronicRegion	Exclusion	shuffle.gc	early
TGTGTG	3.56336	1.34958	1.34079	3ssIntronicRegion	Exclusion	kcl.gc	early	-0.581537	0.45143	1.14364	3ssIntronicRegion	Exclusion	shuffle.gc	early
CCATAC	3.5609	1.40003	1.92967	3ssIntronicRegion	Exclusion	kcl.gc	early	3.01189	1.2087	1.77083	3ssIntronicRegion	Exclusion	shuffle.gc	early
ACAGTG	3.51442	1.55258	1.58685	3ssIntronicRegion	Exclusion	kcl.gc	early	0.652146	0.209286	0.893573	3ssIntronicRegion	Exclusion	shuffle.gc	early
CCCAGT	3.47781	1.37079	1.52407	3ssIntronicRegion	Exclusion	kcl.gc	early	-0.383238	0	0.987291	3ssIntronicRegion	Exclusion	shuffle.gc	early
CAGTGG	3.46315	1.30504	1.49601	3ssIntronicRegion	Exclusion	kcl.gc	early	-0.993093	0.366688	0.845353	3ssIntronicRegion	Exclusion	shuffle.gc	early
GCAAAG	3.46088	1.52468	1.74095	3ssIntronicRegion	Exclusion	kcl.gc	early	-1.84432	0.767607	0.702647	3ssIntronicRegion	Exclusion	shuffle.gc	early
TGTTCC	3.44146	1.39663	1.4568	3ssIntronicRegion	Exclusion	kcl.gc	early	1.13113	0.448404	1.19936	3ssIntronicRegion	Exclusion	shuffle.gc	early
GTGGCC	3.33394	1.48997	1.5653	3ssIntronicRegion	Exclusion	kcl.gc	early	-1.36992	0.442805	0.818354	3ssIntronicRegion	Exclusion	shuffle.gc	early
CCCCCG	3.32234	1.69907	2.15987	3ssIntronicRegion	Exclusion	kcl.gc	early	-0.17128	0	1.02622	3ssIntronicRegion	Exclusion	shuffle.gc	early
GAGGGG	3.31722	1.30381	1.47353	3ssIntronicRegion	Exclusion	kcl.gc	early	-0.669341	0.0345737	0.972632	3ssIntronicRegion	Exclusion	shuffle.gc	early
AGGGGG	3.31066	1.97773	1.76888	3ssIntronicRegion	Exclusion	kcl.gc	early	-1.6233	0.285445	0.852979	3ssIntronicRegion	Exclusion	shuffle.gc	early
TCTGAG	3.27334	1.75671	1.57013	3ssIntronicRegion	Exclusion	kcl.gc	early	-1.20356	0.329483	0.871882	3ssIntronicRegion	Exclusion	shuffle.gc	early
TGCCTC	3.22392	1.61542	1.4501	3ssIntronicRegion	Exclusion	kcl.gc	early	-1.05037	0.331186	0.880002	3ssIntronicRegion	Exclusion	shuffle.gc	early
TCTGCT	3.20787	1.46679	1.39481	3ssIntronicRegion	Exclusion	kcl.gc	early	2.129	1.03448	1.30364	3ssIntronicRegion	Exclusion	shuffle.gc	early
AGAGAT	3.13786	1.30504	1.49601	3ssIntronicRegion	Exclusion	kcl.gc	early	-0.857834	0.254195	0.881357	3ssIntronicRegion	Exclusion	shuffle.gc	early
CTGTAC	3.09613	1.66231	1.72926	3ssIntronicRegion	Exclusion	kcl.gc	early	3.27296	1.09952	1.55227	3ssIntronicRegion	Exclusion	shuffle.gc	early
TGGCCA	3.09572	1.63989	1.62614	3ssIntronicRegion	Exclusion	kcl.gc	early	-1.04966	0.168635	0.90286	3ssIntronicRegion	Exclusion	shuffle.gc	early
AGACAT	3.00504	1.52487	1.64413	3ssIntronicRegion	Exclusion	kcl.gc	early	2.8652	1.06037	1.45443	3ssIntronicRegion	Exclusion	shuffle.gc	early
CTAGCT	2.99112	1.40759	1.63383	3ssIntronicRegion	Exclusion	kcl.gc	early	-0.55267	0.194399	0.893217	3ssIntronicRegion	Exclusion	shuffle.gc	early
GGGATG	2.88184	1.33219	1.47287	3ssIntronicRegion	Exclusion	kcl.gc	early	-0.113839	0.203538	0.899467	3ssIntronicRegion	Exclusion	shuffle.gc	early
CCAGTC	2.7516	1.48914	1.6448	3ssIntronicRegion	Exclusion	kcl.gc	early	0.694885	0.235904	1.13382	3ssIntronicRegion	Exclusion	shuffle.gc	early
TCTGAT	2.6596	1.45804	1.51858	3ssIntronicRegion	Exclusion	kcl.gc	early	-0.477219	0	1.009	3ssIntronicRegion	Exclusion	shuffle.gc	early
CATACC	2.58175	1.31977	2.01737	3ssIntronicRegion	Exclusion	kcl.gc	early	2.05691	0.753378	1.63605	3ssIntronicRegion	Exclusion	shuffle.gc	early
CTCACA	2.56572	1.45804	1.51858	3ssIntronicRegion	Exclusion	kcl.gc	early	-1.26946	0.346526	0.859778	3ssIntronicRegion	Exclusion	shuffle.gc	early
AAAGGG	2.28688	1.41147	1.554	3ssIntronicRegion	Exclusion	kcl.gc	early	0.388953	0.449064	1.2179	3ssIntronicRegion	Exclusion	shuffle.gc	early
GGGCCC	2.28688	1.53504	1.59809	3ssIntronicRegion	Exclusion	kcl.gc	early	-0.0242545	0.0379747	0.961516	3ssIntronicRegion	Exclusion	shuffle.gc	early
GGGGGG	2.17202	2.01931	1.97954	3ssIntronicRegion	Exclusion	kcl.gc	early	-1.18309	0	1.02682	3ssIntronicRegion	Exclusion	shuffle.gc	early
TCTTCT	1.69302	1.4601	1.40762	3ssIntronicRegion	Exclusion	kcl.gc	early	-2.2167	0.561602	0.837168	3ssIntronicRegion	Exclusion	shuffle.gc	early
GGTTGG	8.31482	3.46073	2.38065	3ssIntronicRegion	Exclusion	kcl.gc	late	-0.0106513	0.2655	1.17122	3ssIntronicRegion	Exclusion	shuffle.gc	late
CATTCG	6.32517	1.4135	7.77996	3ssIntronicRegion	Exclusion	kcl.gc	late	2.70636	0.861833	2.79209	3ssIntronicRegion	Exclusion	shuffle.gc	late
AGGTGC	6.0953	3.60909	2.49816	3ssIntronicRegion	Exclusion	kcl.gc	late	-2.17815	0.894091	0.685244	3ssIntronicRegion	Exclusion	shuffle.gc	late
GATCGG	5.82847	1.65768	5.36957	3ssIntronicRegion	Exclusion	kcl.gc	late	-0.12064	0	1.03666	3ssIntronicRegion	Exclusion	shuffle.gc	late
ACAATC	5.59678	2.18615	2.96957	3ssIntronicRegion	Exclusion	kcl.gc	late	-1.94737	0.801153	0.582032	3ssIntronicRegion	Exclusion	shuffle.gc	late
CGGGTT	5.54914	1.94437	3.92814	3ssIntronicRegion	Exclusion	kcl.gc	late	-0.342395	0	0.940825	3ssIntronicRegion	Exclusion	shuffle.gc	late
ACGTCA	5.54914	1.73061	3.6753	3ssIntronicRegion	Exclusion	kcl.gc	late	-0.0793196	0	0.905357	3ssIntronicRegion	Exclusion	shuffle.gc	late
GCAGCC	5.47957	3.06786	1.97178	3ssIntronicRegion	Exclusion	kcl.gc	late	2.79436	0.799327	1.35548	3ssIntronicRegion	Exclusion	shuffle.gc	late
CCCCGG	5.32616	2.33275	2.78282	3ssIntronicRegion	Exclusion	kcl.gc	late	2.56007	0.850324	1.69133	3ssIntronicRegion	Exclusion	shuffle.gc	late
GACACA	5.30379	2.22359	1.8679	3ssIntronicRegion	Exclusion	kcl.gc	late	2.2372	0.303406	1.18225	3ssIntronicRegion	Exclusion	shuffle.gc	late
GGCCTG	4.9313	1.87247	1.6621	3ssIntronicRegion	Exclusion	kcl.gc	late	0.474162	0.115897	1.06181	3ssIntronicRegion	Exclusion	shuffle.gc	late
CCAGCG	4.90417	1.99914	2.84008	3ssIntronicRegion	Exclusion	kcl.gc	late	0.0232519	0	1.0375	3ssIntronicRegion	Exclusion	shuffle.gc	late
CTGCAG	4.9039	2.205	1.61871	3ssIntronicRegion	Exclusion	kcl.gc	late	-0.933437	0.133284	0.943797	3ssIntronicRegion	Exclusion	shuffle.gc	late
GGATTG	4.85422	2.07273	2.25728	3ssIntronicRegion	Exclusion	kcl.gc	late	-0.485088	0	0.994503	3ssIntronicRegion	Exclusion	shuffle.gc	late
TGATCC	4.73549	2.05936	2.52463	3ssIntronicRegion	Exclusion	kcl.gc	late	0.0309834	0	1.03758	3ssIntronicRegion	Exclusion	shuffle.gc	late
GCGGTC	4.735	1.46327	3.90495	3ssIntronicRegion	Exclusion	kcl.gc	late	-1.42023	0.374973	0.571364	3ssIntronicRegion	Exclusion	shuffle.gc	late
AGATAG	4.59707	2.2999	1.98412	3ssIntronicRegion	Exclusion	kcl.gc	late	0.62748	0.315896	1.19252	3ssIntronicRegion	Exclusion	shuffle.gc	late
CCAGTC	4.59171	1.77487	1.81869	3ssIntronicRegion	Exclusion	kcl.gc	late	1.13698	0.392351	1.23308	3ssIntronicRegion	Exclusion	shuffle.gc	late
TGCCAC	4.35433	2.09652	1.83224	3ssIntronicRegion	Exclusion	kcl.gc	late	-1.13263	0.358269	0.832403	3ssIntronicRegion	Exclusion	shuffle.gc	late
TCTGCA	4.34056	2.12463	1.65642	3ssIntronicRegion	Exclusion	kcl.gc	late	0.857403	0.241232	1.1179	3ssIntronicRegion	Exclusion	shuffle.gc	late
GATTAC	4.14778	1.3783	2.5199	3ssIntronicRegion	Exclusion	kcl.gc	late	0.88534	0.384897	1.46377	3ssIntronicRegion	Exclusion	shuffle.gc	late
TCCACT	4.14255	2.15021	1.81772	3ssIntronicRegion	Exclusion	kcl.gc	late	-1.22587	0.349209	0.839819	3ssIntronicRegion	Exclusion	shuffle.gc	late
ATAGCA	4.11097	2.12075	2.05412	3ssIntronicRegion	Exclusion	kcl.gc	late	0.629774	0.0921622	1.07023	3ssIntronicRegion	Exclusion	shuffle.gc	late
GGACAC	4.11097	1.8912	1.92074	3ssIntronicRegion	Exclusion	kcl.gc	late	-0.854147	0.214014	0.854747	3ssIntronicRegion	Exclusion	shuffle.gc	late
TTAGGT	4.08567	1.66005	1.94184	3ssIntronicRegion	Exclusion	kcl.gc	late	0.291269	0.0467515	1.03871	3ssIntronicRegion	Exclusion	shuffle.gc	late
TTTAGC	3.98826	1.54198	1.8184	3ssIntronicRegion	Exclusion	kcl.gc	late	-0.871459	0.0973199	0.912324	3ssIntronicRegion	Exclusion	shuffle.gc	late
GCATTC	3.98652	1.66018	2.04601	3ssIntronicRegion	Exclusion	kcl.gc	late	1.27952	0.468139	1.30386	3ssIntronicRegion	Exclusion	shuffle.gc	late
GTAAGA	3.97659	1.43581	1.87898	3ssIntronicRegion	Exclusion	kcl.gc	late	-2.58618	1.27189	0.575022	3ssIntronicRegion	Exclusion	shuffle.gc	late
GCACAG	3.87413	1.47772	1.63636	3ssIntronicRegion	Exclusion	kcl.gc	late	-0.761605	0.0905672	0.927332	3ssIntronicRegion	Exclusion	shuffle.gc	late
AGTTAA	3.86946	1.8116	1.85009	3ssIntronicRegion	Exclusion	kcl.gc	late	1.99511	0.915194	1.46606	3ssIntronicRegion	Exclusion	shuffle.gc	late
TAGTGG	3.86444	1.4765	1.92831	3ssIntronicRegion	Exclusion	kcl.gc	late	1.33814	0.405505	1.32553	3ssIntronicRegion	Exclusion	shuffle.gc	late
GGGTGG	3.85273	1.46277	1.47541	3ssIntronicRegion	Exclusion	kcl.gc	late	2.70455	0.823861	1.30843	3ssIntronicRegion	Exclusion	shuffle.gc	late
CATGGA	3.80884	1.75984	1.875	3ssIntronicRegion	Exclusion	kcl.gc	late	-1.12364	0.268617	0.839923	3ssIntronicRegion	Exclusion	shuffle.gc	late
AGCCGG	3.77756	1.99388	3.54228	3ssIntronicRegion	Exclusion	kcl.gc	late	-0.547046	0.0770117	0.874011	3ssIntronicRegion	Exclusion	shuffle.gc	late
CTCTGC	3.76744	1.81269	1.47745	3ssIntronicRegion	Exclusion	kcl.gc	late	-1.38695	0.319935	0.889404	3ssIntronicRegion	Exclusion	shuffle.gc	late
ACTCCA	3.76442	1.36238	1.79441	3ssIntronicRegion	Exclusion	kcl.gc	late	2.31577	0.960491	1.54987	3ssIntronicRegion	Exclusion	shuffle.gc	late
ACCACA	3.72675	1.4432	1.72344	3ssIntronicRegion	Exclusion	kcl.gc	late	-0.487645	0.0905672	0.927332	3ssIntronicRegion	Exclusion	shuffle.gc	late
GGCTTT	3.72137	1.32704	1.47148	3ssIntronicRegion	Exclusion	kcl.gc	late	-1.51415	0.530194	0.807256	3ssIntronicRegion	Exclusion	shuffle.gc	late
TGGGAA	3.71705	1.50173	1.49858	3ssIntronicRegion	Exclusion	kcl.gc	late	0.261389	0	0.994507	3ssIntronicRegion	Exclusion	shuffle.gc	late
CAGCCC	3.699	1.52878	1.52696	3ssIntronicRegion	Exclusion	kcl.gc	late	-0.818309	0.301641	0.863877	3ssIntronicRegion	Exclusion	shuffle.gc	late
CGCTTG	3.69727	1.58938	3.13613	3ssIntronicRegion	Exclusion	kcl.gc	late	-0.342395	0	1.03696	3ssIntronicRegion	Exclusion	shuffle.gc	late
AGTTGA	3.68756	1.65127	1.77778	3ssIntronicRegion	Exclusion	kcl.gc	late	-0.185339	0.0447024	0.94869	3ssIntronicRegion	Exclusion	shuffle.gc	late
GTGCGG	3.63037	1.38656	2.29099	3ssIntronicRegion	Exclusion	kcl.gc	late	-0.519312	0.0710252	0.895317	3ssIntronicRegion	Exclusion	shuffle.gc	late
AGAGTG	3.6011	1.67979	1.62256	3ssIntronicRegion	Exclusion	kcl.gc	late	-0.66025	0.0747688	0.942113	3ssIntronicRegion	Exclusion	shuffle.gc	late
GAATCT	3.57975	1.41811	1.77137	3ssIntronicRegion	Exclusion	kcl.gc	late	2.33239	0.867287	1.46684	3ssIntronicRegion	Exclusion	shuffle.gc	late
GGCTGA	3.53749	1.51257	1.59589	3ssIntronicRegion	Exclusion	kcl.gc	late	1.16809	0.165755	1.10794	3ssIntronicRegion	Exclusion	shuffle.gc	late
GTGGGC	3.5325	1.36709	1.5824	3ssIntronicRegion	Exclusion	kcl.gc	late	-0.237552	0.0388344	0.969999	3ssIntronicRegion	Exclusion	shuffle.gc	late
GATAGG	3.51138	1.56584	1.97938	3ssIntronicRegion	Exclusion	kcl.gc	late	2.14025	0.771088	1.58617	3ssIntronicRegion	Exclusion	shuffle.gc	late
TAGTGC	3.50662	1.33699	1.9056	3ssIntronicRegion	Exclusion	kcl.gc	late	0.275412	0	1.03789	3ssIntronicRegion	Exclusion	shuffle.gc	late
CAGAGT	3.50235	1.74268	1.62157	3ssIntronicRegion	Exclusion	kcl.gc	late	1.42275	0.848926	1.3397	3ssIntronicRegion	Exclusion	shuffle.gc	late
TGGCAT	3.48269	1.68507	1.6725	3ssIntronicRegion	Exclusion	kcl.gc	late	0.176369	0.0391198	1.04	3ssIntronicRegion	Exclusion	shuffle.gc	late
TTGTGG	3.48269	1.55426	1.62606	3ssIntronicRegion	Exclusion	kcl.gc	late	0.179629	0.038378	1.04018	3ssIntronicRegion	Exclusion	shuffle.gc	late
CGCCAT	3.43097	1.31804	2.16	3ssIntronicRegion	Exclusion	kcl.gc	late	-1.3205	0.413386	0.717391	3ssIntronicRegion	Exclusion	shuffle.gc	late
TACCAC	3.40268	1.38441	1.92112	3ssIntronicRegion	Exclusion	kcl.gc	late	0.486019	0.256028	1.23702	3ssIntronicRegion	Exclusion	shuffle.gc	late
TGGTAT	3.3755	1.61819	1.89678	3ssIntronicRegion	Exclusion	kcl.gc	late	1.23137	0.365032	1.23699	3ssIntronicRegion	Exclusion	shuffle.gc	late
TCATAG	3.33691	1.36238	1.79441	3ssIntronicRegion	Exclusion	kcl.gc	late	-0.608572	0.10221	0.901119	3ssIntronicRegion	Exclusion	shuffle.gc	late
CTGAAA	3.31831	1.5557	1.58218	3ssIntronicRegion	Exclusion	kcl.gc	late	-0.144074	0.248765	0.881302	3ssIntronicRegion	Exclusion	shuffle.gc	late
CTGTTT	3.31616	1.47957	1.39264	3ssIntronicRegion	Exclusion	kcl.gc	late	0.352401	0.151053	1.05885	3ssIntronicRegion	Exclusion	shuffle.gc	late
TGCTGC	3.28972	1.59956	1.57068	3ssIntronicRegion	Exclusion	kcl.gc	late	-0.215334	0.196497	1.09935	3ssIntronicRegion	Exclusion	shuffle.gc	late
CCTGTT	3.22804	1.52878	1.52696	3ssIntronicRegion	Exclusion	kcl.gc	late	1.98103	0.638398	1.25795	3ssIntronicRegion	Exclusion	shuffle.gc	late
ACATTC	3.17125	1.32912	1.75789	3ssIntronicRegion	Exclusion	kcl.gc	late	1.19111	0.418204	1.25582	3ssIntronicRegion	Exclusion	shuffle.gc	late
AGTGGT	3.14185	1.50064	1.71063	3ssIntronicRegion	Exclusion	kcl.gc	late	-1.24161	0.390267	0.806068	3ssIntronicRegion	Exclusion	shuffle.gc	late
TGAAAT	3.07367	1.35745	1.52949	3ssIntronicRegion	Exclusion	kcl.gc	late	-0.155101	0.0355178	1.02073	3ssIntronicRegion	Exclusion	shuffle.gc	late
GTGGAG	3.04777	1.55426	1.62606	3ssIntronicRegion	Exclusion	kcl.gc	late	0.0448237	0.12621	1.0891	3ssIntronicRegion	Exclusion	shuffle.gc	late
TGTTTC	3.00352	1.68735	1.45446	3ssIntronicRegion	Exclusion	kcl.gc	late	-0.410205	0.124066	0.945274	3ssIntronicRegion	Exclusion	shuffle.gc	late
CCAAAC	2.99051	1.52026	1.98344	3ssIntronicRegion	Exclusion	kcl.gc	late	3.30799	1.25235	1.83679	3ssIntronicRegion	Exclusion	shuffle.gc	late
TGTTCA	2.93993	1.31191	1.53997	3ssIntronicRegion	Exclusion	kcl.gc	late	-0.473041	0.0370291	0.976208	3ssIntronicRegion	Exclusion	shuffle.gc	late
ACAGGA	2.91294	1.5964	1.62872	3ssIntronicRegion	Exclusion	kcl.gc	late	0.0356462	0.0391198	1.04	3ssIntronicRegion	Exclusion	shuffle.gc	late
GGATGG	2.85851	1.36977	1.6026	3ssIntronicRegion	Exclusion	kcl.gc	late	-2.0698	0.139974	1.0987	3ssIntronicRegion	Exclusion	shuffle.gc	late
TCCTCA	2.70708	1.40356	1.48511	3ssIntronicRegion	Exclusion	kcl.gc	late	0.353482	0.152361	1.07994	3ssIntronicRegion	Exclusion	shuffle.gc	late
AGGGTG	2.67879	1.84662	1.70931	3ssIntronicRegion	Exclusion	kcl.gc	late	0.75556	0.172418	1.11253	3ssIntronicRegion	Exclusion	shuffle.gc	late
TGAGAT	2.64295	1.42966	1.6	3ssIntronicRegion	Exclusion	kcl.gc	late	1.09463	0.134872	1.09498	3ssIntronicRegion	Exclusion	shuffle.gc	late
GCAGTC	2.62266	1.35921	1.64811	3ssIntronicRegion	Exclusion	kcl.gc	late	-1.83599	0.571709	0.742675	3ssIntronicRegion	Exclusion	shuffle.gc	late
GGTGAG	2.48589	1.42012	1.53195	3ssIntronicRegion	Exclusion	kcl.gc	late	2.08921	0.545603	1.2362	3ssIntronicRegion	Exclusion	shuffle.gc	late
CTGTTC	2.47318	1.54347	1.50263	3ssIntronicRegion	Exclusion	kcl.gc	late	1.43058	0.627962	1.25241	3ssIntronicRegion	Exclusion	shuffle.gc	late
CTGCTG	2.2642	1.3378	1.38033	3ssIntronicRegion	Exclusion	kcl.gc	late	-1.89261	0.125176	0.943584	3ssIntronicRegion	Exclusion	shuffle.gc	late
CTGAGA	2.15667	1.42302	1.465	3ssIntronicRegion	Exclusion	kcl.gc	late	1.87556	0.710762	1.28139	3ssIntronicRegion	Exclusion	shuffle.gc	late
CTGTCT	1.566	1.64901	1.42588	3ssIntronicRegion	Exclusion	kcl.gc	late	2.16863	1.18742	1.34168	3ssIntronicRegion	Exclusion	shuffle.gc	late
TGTCTG	1.49579	1.31265	1.39161	3ssIntronicRegion	Exclusion	kcl.gc	late	1.83805	0.862918	1.28272	3ssIntronicRegion	Exclusion	shuffle.gc	late
TCAGAT	10.9359	2.71261	12.1918	5ssExonicRegion	Exclusion	kcl.gc	early	2.80537	0.945126	2.56983	5ssExonicRegion	Exclusion	shuffle.gc	early
CTCCAT	9.97754	2.44539	11.234	5ssExonicRegion	Exclusion	kcl.gc	early	0.245798	0.103624	1.18827	5ssExonicRegion	Exclusion	shuffle.gc	early
AAGACT	8.35045	2.59987	7.04545	5ssExonicRegion	Exclusion	kcl.gc	early	1.48071	0.487896	1.70701	5ssExonicRegion	Exclusion	shuffle.gc	early
TCGGGA	8.06084	1.91713	9.32862	5ssExonicRegion	Exclusion	kcl.gc	early	-1.91459	0.648998	0.377757	5ssExonicRegion	Exclusion	shuffle.gc	early
AGCTCT	7.73907	3.00525	4.55652	5ssExonicRegion	Exclusion	kcl.gc	early	0.4932	0.157631	1.19074	5ssExonicRegion	Exclusion	shuffle.gc	early
GCATCT	7.73655	2.9926	4.96622	5ssExonicRegion	Exclusion	kcl.gc	early	2.00692	0.694217	1.79925	5ssExonicRegion	Exclusion	shuffle.gc	early
ATACCT	7.10249	1.65687	8.38095	5ssExonicRegion	Exclusion	kcl.gc	early	-2.47192	1.19238	0.223038	5ssExonicRegion	Exclusion	shuffle.gc	early
TTCACG	7.10249	1.65687	8.38095	5ssExonicRegion	Exclusion	kcl.gc	early	-1.40075	0.29572	0.505515	5ssExonicRegion	Exclusion	shuffle.gc	early
CCGTGA	7.10249	1.65687	8.38095	5ssExonicRegion	Exclusion	kcl.gc	early	-0.577477	0	0.845633	5ssExonicRegion	Exclusion	shuffle.gc	early
ATCTAC	7.10249	1.65687	8.38095	5ssExonicRegion	Exclusion	kcl.gc	early	-0.188964	0	1.01661	5ssExonicRegion	Exclusion	shuffle.gc	early
GTCTCC	6.29894	2.32811	4.23387	5ssExonicRegion	Exclusion	kcl.gc	early	-0.380109	0	0.930348	5ssExonicRegion	Exclusion	shuffle.gc	early
GCAGTA	6.14414	1.39988	7.43662	5ssExonicRegion	Exclusion	kcl.gc	early	-1.81239	0.541508	0.336391	5ssExonicRegion	Exclusion	shuffle.gc	early
CTGTAG	6.14414	1.39988	7.43662	5ssExonicRegion	Exclusion	kcl.gc	early	3.94417	1.20558	4.11132	5ssExonicRegion	Exclusion	shuffle.gc	early
ACATGT	6.14414	1.39988	7.43662	5ssExonicRegion	Exclusion	kcl.gc	early	-2.05292	0.749507	0.287811	5ssExonicRegion	Exclusion	shuffle.gc	early
GCAGCT	5.65525	2.21761	2.84153	5ssExonicRegion	Exclusion	kcl.gc	early	-2.12995	0.771961	0.590909	5ssExonicRegion	Exclusion	shuffle.gc	early
CGCAGG	5.63977	1.63431	5.13009	5ssExonicRegion	Exclusion	kcl.gc	early	-0.577477	0	0.845633	5ssExonicRegion	Exclusion	shuffle.gc	early
AAAAGA	5.16734	1.94377	3.38065	5ssExonicRegion	Exclusion	kcl.gc	early	0.211055	0.0814601	1.12052	5ssExonicRegion	Exclusion	shuffle.gc	early
AGCATG	5.10911	1.43948	3.7305	5ssExonicRegion	Exclusion	kcl.gc	early	1.89235	0.487896	1.70701	5ssExonicRegion	Exclusion	shuffle.gc	early
GAGCAT	4.9621	1.40244	4.65548	5ssExonicRegion	Exclusion	kcl.gc	early	0.712873	0.239533	1.42852	5ssExonicRegion	Exclusion	shuffle.gc	early
GCGGGA	4.9621	1.40244	4.65548	5ssExonicRegion	Exclusion	kcl.gc	early	0.788841	0.264491	1.5305	5ssExonicRegion	Exclusion	shuffle.gc	early
TTTGCA	4.73872	1.74621	3.18712	5ssExonicRegion	Exclusion	kcl.gc	early	2.13928	0.739845	1.90931	5ssExonicRegion	Exclusion	shuffle.gc	early
ACCAGC	4.68244	1.62002	2.97337	5ssExonicRegion	Exclusion	kcl.gc	early	0.848807	0.272456	1.32921	5ssExonicRegion	Exclusion	shuffle.gc	early
GCTGCG	4.55578	1.43948	3.7305	5ssExonicRegion	Exclusion	kcl.gc	early	-1.12745	0.21831	0.67406	5ssExonicRegion	Exclusion	shuffle.gc	early
ATGTCC	4.55578	1.43948	3.7305	5ssExonicRegion	Exclusion	kcl.gc	early	-1.92213	0.683988	0.457061	5ssExonicRegion	Exclusion	shuffle.gc	early
GATTCA	4.55578	1.43948	3.7305	5ssExonicRegion	Exclusion	kcl.gc	early	1.16379	0.37917	1.63562	5ssExonicRegion	Exclusion	shuffle.gc	early
CTGAAG	4.41517	1.7717	2.06745	5ssExonicRegion	Exclusion	kcl.gc	early	1.19115	0.47587	1.33172	5ssExonicRegion	Exclusion	shuffle.gc	early
AGATTG	4.38212	1.49216	3.26957	5ssExonicRegion	Exclusion	kcl.gc	early	0.553145	0.181536	1.24731	5ssExonicRegion	Exclusion	shuffle.gc	early
TTTCCA	4.38212	1.49216	3.26957	5ssExonicRegion	Exclusion	kcl.gc	early	0.553145	0.181536	1.24731	5ssExonicRegion	Exclusion	shuffle.gc	early
TGCACT	4.38212	1.49216	3.26957	5ssExonicRegion	Exclusion	kcl.gc	early	0.937419	0.304044	1.40578	5ssExonicRegion	Exclusion	shuffle.gc	early
ACCTCA	4.37725	1.69062	2.51208	5ssExonicRegion	Exclusion	kcl.gc	early	1.54343	0.523468	1.46923	5ssExonicRegion	Exclusion	shuffle.gc	early
CACACC	4.3101	1.55306	2.99429	5ssExonicRegion	Exclusion	kcl.gc	early	0.937419	0.304044	1.40578	5ssExonicRegion	Exclusion	shuffle.gc	early
GTCCAG	4.29116	1.61864	2.81183	5ssExonicRegion	Exclusion	kcl.gc	early	-0.882238	0.163128	0.79451	5ssExonicRegion	Exclusion	shuffle.gc	early
GTGGCT	4.29116	1.61864	2.81183	5ssExonicRegion	Exclusion	kcl.gc	early	1.22538	0.401546	1.47961	5ssExonicRegion	Exclusion	shuffle.gc	early
AGCCTC	3.94073	1.34695	2.54373	5ssExonicRegion	Exclusion	kcl.gc	early	0.202097	0.0746222	1.10362	5ssExonicRegion	Exclusion	shuffle.gc	early
CTCCTT	3.94073	1.34695	2.54373	5ssExonicRegion	Exclusion	kcl.gc	early	-1.57349	0.492736	0.628492	5ssExonicRegion	Exclusion	shuffle.gc	early
CCATCC	3.89988	1.43752	2.65086	5ssExonicRegion	Exclusion	kcl.gc	early	-0.705968	0.0849673	0.828827	5ssExonicRegion	Exclusion	shuffle.gc	early
TGAAAG	3.88148	1.36474	2.80214	5ssExonicRegion	Exclusion	kcl.gc	early	0.206158	0.0778168	1.1113	5ssExonicRegion	Exclusion	shuffle.gc	early
GGTGGA	3.88148	1.36474	2.80214	5ssExonicRegion	Exclusion	kcl.gc	early	-0.671213	0.0807982	0.844196	5ssExonicRegion	Exclusion	shuffle.gc	early
CTGTCT	3.44056	1.3851	2.13661	5ssExonicRegion	Exclusion	kcl.gc	early	-1.35576	0.220175	0.796894	5ssExonicRegion	Exclusion	shuffle.gc	early
GCGGGA	12.2412	2.75712	12.8427	5ssExonicRegion	Exclusion	kcl.gc	late	1.17978	0.240444	1.43737	5ssExonicRegion	Exclusion	shuffle.gc	late
CGGCGG	10.2769	1.67635	8.82	5ssExonicRegion	Exclusion	kcl.gc	late	-0.83151	0.113005	1.22951	5ssExonicRegion	Exclusion	shuffle.gc	late
GTGGAC	9.2947	2.21093	10.8233	5ssExonicRegion	Exclusion	kcl.gc	late	1.49881	0.489993	1.71832	5ssExonicRegion	Exclusion	shuffle.gc	late
GGTGCT	8.63057	2.65262	7.42409	5ssExonicRegion	Exclusion	kcl.gc	late	1.086	0.350153	1.5433	5ssExonicRegion	Exclusion	shuffle.gc	late
CTCCGT	8.31252	1.94197	9.81964	5ssExonicRegion	Exclusion	kcl.gc	late	-0.565274	0	0.850375	5ssExonicRegion	Exclusion	shuffle.gc	late
ACCCAT	8.31252	1.94197	9.81964	5ssExonicRegion	Exclusion	kcl.gc	late	0.296838	0.124768	1.28067	5ssExonicRegion	Exclusion	shuffle.gc	late
AAGCAT	8.31252	1.94197	9.81964	5ssExonicRegion	Exclusion	kcl.gc	late	-0.176854	0	1.02249	5ssExonicRegion	Exclusion	shuffle.gc	late
GGCCTC	7.93605	2.39878	6.91515	5ssExonicRegion	Exclusion	kcl.gc	late	0.63158	0.205643	1.32018	5ssExonicRegion	Exclusion	shuffle.gc	late
ATACAG	7.33034	1.67635	8.82	5ssExonicRegion	Exclusion	kcl.gc	late	1.49759	0.47295	2.05738	5ssExonicRegion	Exclusion	shuffle.gc	late
CTCAAG	7.24153	1.90184	5.90342	5ssExonicRegion	Exclusion	kcl.gc	late	-0.410031	0.089886	0.814815	5ssExonicRegion	Exclusion	shuffle.gc	late
GAAAGC	7.24153	2.14839	6.40827	5ssExonicRegion	Exclusion	kcl.gc	late	1.17978	0.380712	1.64609	5ssExonicRegion	Exclusion	shuffle.gc	late
AGCATA	6.34816	1.41462	7.82435	5ssExonicRegion	Exclusion	kcl.gc	late	2.66515	0.854579	2.75446	5ssExonicRegion	Exclusion	shuffle.gc	late
TCATTA	6.34816	1.41462	7.82435	5ssExonicRegion	Exclusion	kcl.gc	late	-0.714314	0	0.765275	5ssExonicRegion	Exclusion	shuffle.gc	late
CGGGAA	6.34816	1.41462	7.82435	5ssExonicRegion	Exclusion	kcl.gc	late	-1.90408	0.649198	0.379582	5ssExonicRegion	Exclusion	shuffle.gc	late
TGTGCG	6.34816	1.41462	7.82435	5ssExonicRegion	Exclusion	kcl.gc	late	-1.80373	0.541627	0.338076	5ssExonicRegion	Exclusion	shuffle.gc	late
ATGAAC	6.34816	1.41462	7.82435	5ssExonicRegion	Exclusion	kcl.gc	late	0.296838	0.124768	1.28067	5ssExonicRegion	Exclusion	shuffle.gc	late
CCGTGC	6.34816	1.41462	7.82435	5ssExonicRegion	Exclusion	kcl.gc	late	-2.04384	0.749698	0.289199	5ssExonicRegion	Exclusion	shuffle.gc	late
CTGTTT	5.89202	1.91228	4.60067	5ssExonicRegion	Exclusion	kcl.gc	late	-1.9089	0.684297	0.459193	5ssExonicRegion	Exclusion	shuffle.gc	late
GACATG	5.8525	1.65963	5.4006	5ssExonicRegion	Exclusion	kcl.gc	late	1.81357	0.586486	2.06173	5ssExonicRegion	Exclusion	shuffle.gc	late
ATCAGC	5.84976	2.20806	3.76898	5ssExonicRegion	Exclusion	kcl.gc	late	0.83535	0.260899	1.30985	5ssExonicRegion	Exclusion	shuffle.gc	late
CAGGAC	5.72649	2.26016	3.47848	5ssExonicRegion	Exclusion	kcl.gc	late	2.59421	0.943688	1.96413	5ssExonicRegion	Exclusion	shuffle.gc	late
CTTCTG	5.62863	2.19279	2.98763	5ssExonicRegion	Exclusion	kcl.gc	late	1.02846	0.231071	1.24993	5ssExonicRegion	Exclusion	shuffle.gc	late
GTGGAG	5.32548	2.05749	3.30607	5ssExonicRegion	Exclusion	kcl.gc	late	-0.567517	0.156374	0.813278	5ssExonicRegion	Exclusion	shuffle.gc	late
TTCCCT	5.32493	1.68618	4.26344	5ssExonicRegion	Exclusion	kcl.gc	late	0.275356	0.113005	1.22951	5ssExonicRegion	Exclusion	shuffle.gc	late
CCTCAA	5.32493	1.68618	4.26344	5ssExonicRegion	Exclusion	kcl.gc	late	-1.29906	0.321369	0.645511	5ssExonicRegion	Exclusion	shuffle.gc	late
GCAGGA	5.2882	1.74248	2.82793	5ssExonicRegion	Exclusion	kcl.gc	late	-0.291151	0	0.952778	5ssExonicRegion	Exclusion	shuffle.gc	late
TTCAAT	5.15798	1.42236	4.8998	5ssExonicRegion	Exclusion	kcl.gc	late	1.17978	0.380712	1.64609	5ssExonicRegion	Exclusion	shuffle.gc	late
CTAATG	5.15798	1.42236	4.8998	5ssExonicRegion	Exclusion	kcl.gc	late	-0.176854	0	1.02249	5ssExonicRegion	Exclusion	shuffle.gc	late
AGAATT	5.15798	1.42236	4.8998	5ssExonicRegion	Exclusion	kcl.gc	late	1.086	0.350153	1.5433	5ssExonicRegion	Exclusion	shuffle.gc	late
TAATGA	5.15798	1.42236	4.8998	5ssExonicRegion	Exclusion	kcl.gc	late	0.673179	0.221112	1.369	5ssExonicRegion	Exclusion	shuffle.gc	late
AGCGGG	5.15798	1.42236	4.8998	5ssExonicRegion	Exclusion	kcl.gc	late	1.30799	0.420012	1.80031	5ssExonicRegion	Exclusion	shuffle.gc	late
GCATCT	4.75785	1.46525	3.92757	5ssExonicRegion	Exclusion	kcl.gc	late	0.673179	0.221112	1.369	5ssExonicRegion	Exclusion	shuffle.gc	late
AGTCAG	4.59362	1.52443	3.44343	5ssExonicRegion	Exclusion	kcl.gc	late	-1.29906	0.321369	0.645511	5ssExonicRegion	Exclusion	shuffle.gc	late
GCTTCT	4.52345	1.66576	2.96334	5ssExonicRegion	Exclusion	kcl.gc	late	0.549346	0.17311	1.23237	5ssExonicRegion	Exclusion	shuffle.gc	late
TGATGC	4.12244	1.47739	2.79302	5ssExonicRegion	Exclusion	kcl.gc	late	2.54259	0.899364	2.075	5ssExonicRegion	Exclusion	shuffle.gc	late
ACCTCA	4.09264	1.39746	2.95142	5ssExonicRegion	Exclusion	kcl.gc	late	2.02869	0.697492	1.81198	5ssExonicRegion	Exclusion	shuffle.gc	late
GATCAG	4.09264	1.39746	2.95142	5ssExonicRegion	Exclusion	kcl.gc	late	-0.10246	0	1.02268	5ssExonicRegion	Exclusion	shuffle.gc	late
TTCTGT	3.89212	1.46871	2.46933	5ssExonicRegion	Exclusion	kcl.gc	late	1.39004	0.455828	1.46419	5ssExonicRegion	Exclusion	shuffle.gc	late
TGGAGA	3.7833	1.38815	1.87051	5ssExonicRegion	Exclusion	kcl.gc	late	-0.582009	0.258315	0.817938	5ssExonicRegion	Exclusion	shuffle.gc	late
GGAAGA	3.19752	1.38145	2.53477	5ssExonicRegion	Exclusion	kcl.gc	late	-1.08979	0.163224	0.798728	5ssExonicRegion	Exclusion	shuffle.gc	late
GAGAGA	8.03329	1.58078	1.57186	5ssIntronicRegion	Exclusion	kcl.gc	early	-0.602442	0.0728326	1.05785	5ssIntronicRegion	Exclusion	shuffle.gc	early
CTCGAT	7.10238	1.65687	8.38095	5ssIntronicRegion	Exclusion	kcl.gc	early	0.712819	0.239533	1.42852	5ssIntronicRegion	Exclusion	shuffle.gc	early
GACGTT	6.99489	2.11049	6.08437	5ssIntronicRegion	Exclusion	kcl.gc	early	0.614782	0.204859	1.312	5ssIntronicRegion	Exclusion	shuffle.gc	early
TGCGGA	6.31724	1.87053	5.60638	5ssIntronicRegion	Exclusion	kcl.gc	early	1.89218	0.636761	1.88122	5ssIntronicRegion	Exclusion	shuffle.gc	early
AGCGCA	6.21546	2.09745	4.68806	5ssIntronicRegion	Exclusion	kcl.gc	early	1.48058	0.487896	1.70701	5ssIntronicRegion	Exclusion	shuffle.gc	early
GTAGCG	6.14404	1.39988	7.43662	5ssIntronicRegion	Exclusion	kcl.gc	early	-0.18895	0	1.01661	5ssIntronicRegion	Exclusion	shuffle.gc	early
GCACAA	6.04109	2.68886	2.42975	5ssIntronicRegion	Exclusion	kcl.gc	early	0.753276	0.103438	1.09422	5ssIntronicRegion	Exclusion	shuffle.gc	early
CTTAGC	5.74551	3.19028	2.19737	5ssIntronicRegion	Exclusion	kcl.gc	early	1.63579	0.67915	1.35778	5ssIntronicRegion	Exclusion	shuffle.gc	early
CGTTAT	5.66217	1.87388	4.36773	5ssIntronicRegion	Exclusion	kcl.gc	early	-1.70195	0.524823	0.50369	5ssIntronicRegion	Exclusion	shuffle.gc	early
AGACCG	5.6396	1.63431	5.13009	5ssIntronicRegion	Exclusion	kcl.gc	early	-0.791223	0.21831	0.67406	5ssIntronicRegion	Exclusion	shuffle.gc	early
CGGAGT	5.6396	1.63431	5.13009	5ssIntronicRegion	Exclusion	kcl.gc	early	0.614782	0.204859	1.312	5ssIntronicRegion	Exclusion	shuffle.gc	early
CGTGAG	5.34019	1.69473	3.50936	5ssIntronicRegion	Exclusion	kcl.gc	early	-0.107805	0	0.913383	5ssIntronicRegion	Exclusion	shuffle.gc	early
GGCTGG	5.30529	1.39926	1.40008	5ssIntronicRegion	Exclusion	kcl.gc	early	-0.879946	0.0287978	0.980823	5ssIntronicRegion	Exclusion	shuffle.gc	early
CCTAAG	5.29859	2.2061	2.00061	5ssIntronicRegion	Exclusion	kcl.gc	early	-1.76942	0.945332	0.667909	5ssIntronicRegion	Exclusion	shuffle.gc	early
CAGGGT	5.16433	2.32583	1.64216	5ssIntronicRegion	Exclusion	kcl.gc	early	0.202937	0	1.00378	5ssIntronicRegion	Exclusion	shuffle.gc	early
GGCCCC	5.14586	1.51843	1.54973	5ssIntronicRegion	Exclusion	kcl.gc	early	2.32699	0.706461	1.31727	5ssIntronicRegion	Exclusion	shuffle.gc	early
AATCTC	5.11132	2.28274	2.32856	5ssIntronicRegion	Exclusion	kcl.gc	early	0.181438	0.103438	1.09422	5ssIntronicRegion	Exclusion	shuffle.gc	early
TTACAC	5.0503	2.28274	2.32856	5ssIntronicRegion	Exclusion	kcl.gc	early	-0.370822	0.166428	0.874984	5ssIntronicRegion	Exclusion	shuffle.gc	early
ACTCGA	4.96195	1.40244	4.65548	5ssIntronicRegion	Exclusion	kcl.gc	early	0.245776	0.103624	1.18827	5ssIntronicRegion	Exclusion	shuffle.gc	early
TCCAGG	4.92964	2.27287	1.7521	5ssIntronicRegion	Exclusion	kcl.gc	early	1.99957	0.514076	1.21314	5ssIntronicRegion	Exclusion	shuffle.gc	early
CCCTAA	4.92267	2.2061	2.00061	5ssIntronicRegion	Exclusion	kcl.gc	early	0.0211988	0.0439273	1.04793	5ssIntronicRegion	Exclusion	shuffle.gc	early
GTCAGA	4.85528	2.47203	1.93774	5ssIntronicRegion	Exclusion	kcl.gc	early	3.05265	1.26678	1.54207	5ssIntronicRegion	Exclusion	shuffle.gc	early
GAGCCG	4.73835	1.55306	2.99429	5ssIntronicRegion	Exclusion	kcl.gc	early	2.9012	0.895013	2.06004	5ssIntronicRegion	Exclusion	shuffle.gc	early
GACCCC	4.73471	1.77305	1.83899	5ssIntronicRegion	Exclusion	kcl.gc	early	-0.76159	0.264796	0.851092	5ssIntronicRegion	Exclusion	shuffle.gc	early
GGGGCT	4.60405	1.45291	1.46663	5ssIntronicRegion	Exclusion	kcl.gc	early	-1.74422	0.872516	0.757755	5ssIntronicRegion	Exclusion	shuffle.gc	early
TAAACC	4.57591	2.30341	2.23283	5ssIntronicRegion	Exclusion	kcl.gc	early	0.181508	0	1.01737	5ssIntronicRegion	Exclusion	shuffle.gc	early
ACCCCA	4.52638	2.03457	1.64921	5ssIntronicRegion	Exclusion	kcl.gc	early	-1.18795	0.347768	0.851197	5ssIntronicRegion	Exclusion	shuffle.gc	early
AACCAA	4.52063	1.67206	1.74721	5ssIntronicRegion	Exclusion	kcl.gc	early	0.0301451	0.192709	0.887862	5ssIntronicRegion	Exclusion	shuffle.gc	early
ACCCTG	4.51918	2.1321	1.70964	5ssIntronicRegion	Exclusion	kcl.gc	early	0.0675583	0	1.00007	5ssIntronicRegion	Exclusion	shuffle.gc	early
GGCCTC	4.43926	1.88943	1.64458	5ssIntronicRegion	Exclusion	kcl.gc	early	-1.13908	0.350846	0.84901	5ssIntronicRegion	Exclusion	shuffle.gc	early
GTGCAG	4.40256	1.38077	1.54032	5ssIntronicRegion	Exclusion	kcl.gc	early	0.18952	0.168899	1.1101	5ssIntronicRegion	Exclusion	shuffle.gc	early
CGTGAC	4.38185	1.49216	3.26957	5ssIntronicRegion	Exclusion	kcl.gc	early	0.216997	0.0856656	1.1318	5ssIntronicRegion	Exclusion	shuffle.gc	early
CTCCGC	4.37663	1.96107	2.83152	5ssIntronicRegion	Exclusion	kcl.gc	early	-1.06899	0.246458	0.757009	5ssIntronicRegion	Exclusion	shuffle.gc	early
GTAATC	4.37663	1.52352	2.40305	5ssIntronicRegion	Exclusion	kcl.gc	early	-1.167	0.414978	0.70394	5ssIntronicRegion	Exclusion	shuffle.gc	early
TGTCAT	4.37271	1.69882	1.68177	5ssIntronicRegion	Exclusion	kcl.gc	early	1.75533	0.524817	1.2645	5ssIntronicRegion	Exclusion	shuffle.gc	early
CTCGAG	4.33338	1.60622	2.58619	5ssIntronicRegion	Exclusion	kcl.gc	early	-0.0669544	0	1.01692	5ssIntronicRegion	Exclusion	shuffle.gc	early
AGCCGT	4.30976	1.55306	2.99429	5ssIntronicRegion	Exclusion	kcl.gc	early	0.553071	0.181536	1.24731	5ssIntronicRegion	Exclusion	shuffle.gc	early
AGTCGG	4.30252	1.5212	2.68243	5ssIntronicRegion	Exclusion	kcl.gc	early	-0.882053	0.163128	0.79451	5ssIntronicRegion	Exclusion	shuffle.gc	early
TTAAAC	4.28789	2.07315	2.00017	5ssIntronicRegion	Exclusion	kcl.gc	early	0.894417	0.209466	1.15362	5ssIntronicRegion	Exclusion	shuffle.gc	early
ACTCCT	4.27539	1.86681	1.75612	5ssIntronicRegion	Exclusion	kcl.gc	early	-2.06038	0.779511	0.738088	5ssIntronicRegion	Exclusion	shuffle.gc	early
AGGCCT	4.20987	1.35571	1.50012	5ssIntronicRegion	Exclusion	kcl.gc	early	-1.44213	0.532926	0.81589	5ssIntronicRegion	Exclusion	shuffle.gc	early
GGACCC	4.18803	1.74953	1.69289	5ssIntronicRegion	Exclusion	kcl.gc	early	-0.526292	0.176562	0.9051	5ssIntronicRegion	Exclusion	shuffle.gc	early
CTCATT	4.16984	1.41978	1.57051	5ssIntronicRegion	Exclusion	kcl.gc	early	-0.07711	0	0.996588	5ssIntronicRegion	Exclusion	shuffle.gc	early
TACTCC	4.16379	1.79511	2.16387	5ssIntronicRegion	Exclusion	kcl.gc	early	-0.982428	0.25186	0.821023	5ssIntronicRegion	Exclusion	shuffle.gc	early
TGATTC	4.13617	1.72095	2.00516	5ssIntronicRegion	Exclusion	kcl.gc	early	0.93044	0.101662	1.09175	5ssIntronicRegion	Exclusion	shuffle.gc	early
CCAGGC	4.12848	1.64779	1.51422	5ssIntronicRegion	Exclusion	kcl.gc	early	0.531986	0.218968	1.09864	5ssIntronicRegion	Exclusion	shuffle.gc	early
GATAGC	4.07877	1.41495	2.02807	5ssIntronicRegion	Exclusion	kcl.gc	early	-1.13532	0.307076	0.755639	5ssIntronicRegion	Exclusion	shuffle.gc	early
GATTCT	4.07876	2.02335	1.95463	5ssIntronicRegion	Exclusion	kcl.gc	early	-1.09249	0.207545	0.871582	5ssIntronicRegion	Exclusion	shuffle.gc	early
GGTGGA	4.04167	1.74953	1.69289	5ssIntronicRegion	Exclusion	kcl.gc	early	-0.634766	0.225648	0.887626	5ssIntronicRegion	Exclusion	shuffle.gc	early
GACATT	3.98695	1.58569	1.73816	5ssIntronicRegion	Exclusion	kcl.gc	early	2.08376	0.619041	1.343	5ssIntronicRegion	Exclusion	shuffle.gc	early
CCCTTA	3.93214	1.47288	1.63958	5ssIntronicRegion	Exclusion	kcl.gc	early	0.805919	0.438703	1.2516	5ssIntronicRegion	Exclusion	shuffle.gc	early
GTGGAG	3.92227	1.72343	1.57999	5ssIntronicRegion	Exclusion	kcl.gc	early	1.33648	0.528006	1.22197	5ssIntronicRegion	Exclusion	shuffle.gc	early
GCGGCG	3.89951	1.63431	5.13009	5ssIntronicRegion	Exclusion	kcl.gc	early	0.206124	0	0.869818	5ssIntronicRegion	Exclusion	shuffle.gc	early
CCTGTT	3.8944	1.43976	1.45834	5ssIntronicRegion	Exclusion	kcl.gc	early	-0.460085	0.0312522	1.01911	5ssIntronicRegion	Exclusion	shuffle.gc	early
TGAACC	3.88821	1.76032	1.86441	5ssIntronicRegion	Exclusion	kcl.gc	early	-0.164213	0	0.985695	5ssIntronicRegion	Exclusion	shuffle.gc	early
TCCCTA	3.83872	1.61144	1.69587	5ssIntronicRegion	Exclusion	kcl.gc	early	1.24835	0.421174	1.23592	5ssIntronicRegion	Exclusion	shuffle.gc	early
ACAGCC	3.83869	1.51029	1.52278	5ssIntronicRegion	Exclusion	kcl.gc	early	0.195207	0.109337	1.05577	5ssIntronicRegion	Exclusion	shuffle.gc	early
TTAGCT	3.82069	1.64114	1.72069	5ssIntronicRegion	Exclusion	kcl.gc	early	1.19026	0.382753	1.23236	5ssIntronicRegion	Exclusion	shuffle.gc	early
GGTACA	3.81778	1.7717	2.06745	5ssIntronicRegion	Exclusion	kcl.gc	early	-0.58055	0.173332	0.865337	5ssIntronicRegion	Exclusion	shuffle.gc	early
TTACTC	3.68837	1.63341	1.81955	5ssIntronicRegion	Exclusion	kcl.gc	early	-1.21671	0.468548	0.785714	5ssIntronicRegion	Exclusion	shuffle.gc	early
TGTAAT	3.59845	1.39026	1.62795	5ssIntronicRegion	Exclusion	kcl.gc	early	-0.101819	0.0822668	0.947337	5ssIntronicRegion	Exclusion	shuffle.gc	early
GGTCTC	3.59845	1.81131	1.73902	5ssIntronicRegion	Exclusion	kcl.gc	early	1.65452	0.508879	1.28137	5ssIntronicRegion	Exclusion	shuffle.gc	early
TAAGTC	3.58507	1.54713	1.81256	5ssIntronicRegion	Exclusion	kcl.gc	early	0.365524	0.0999772	1.08945	5ssIntronicRegion	Exclusion	shuffle.gc	early
GGGTGG	3.54654	1.3386	1.39567	5ssIntronicRegion	Exclusion	kcl.gc	early	-0.874821	0.0590286	0.968864	5ssIntronicRegion	Exclusion	shuffle.gc	early
CTCAAG	3.54586	1.44241	1.67488	5ssIntronicRegion	Exclusion	kcl.gc	early	1.34251	0.524066	1.29482	5ssIntronicRegion	Exclusion	shuffle.gc	early
CCTTAC	3.50372	1.5097	1.77486	5ssIntronicRegion	Exclusion	kcl.gc	early	-1.39148	0.346071	0.813947	5ssIntronicRegion	Exclusion	shuffle.gc	early
GAACCA	3.47887	1.62876	1.89925	5ssIntronicRegion	Exclusion	kcl.gc	early	0.555974	0.224366	1.17171	5ssIntronicRegion	Exclusion	shuffle.gc	early
GGTAGC	3.47656	1.41046	1.84259	5ssIntronicRegion	Exclusion	kcl.gc	early	-1.26733	0.389698	0.777154	5ssIntronicRegion	Exclusion	shuffle.gc	early
GACCGC	3.44897	1.40244	4.65548	5ssIntronicRegion	Exclusion	kcl.gc	early	0.657376	0.103624	1.18827	5ssIntronicRegion	Exclusion	shuffle.gc	early
CCCTGT	3.33253	1.80908	1.57499	5ssIntronicRegion	Exclusion	kcl.gc	early	-2.13062	1.23668	0.69887	5ssIntronicRegion	Exclusion	shuffle.gc	early
TAGCTG	3.32582	1.44018	1.5868	5ssIntronicRegion	Exclusion	kcl.gc	early	0.779718	0.127639	1.09232	5ssIntronicRegion	Exclusion	shuffle.gc	early
TGACTT	3.27668	1.50791	1.50274	5ssIntronicRegion	Exclusion	kcl.gc	early	-0.365472	0.102745	0.94116	5ssIntronicRegion	Exclusion	shuffle.gc	early
TGGCAC	3.22687	1.4158	1.65064	5ssIntronicRegion	Exclusion	kcl.gc	early	1.03394	0.259267	1.17442	5ssIntronicRegion	Exclusion	shuffle.gc	early
GCCTCT	3.17736	1.55599	1.49467	5ssIntronicRegion	Exclusion	kcl.gc	early	-0.664201	0.0647984	0.958747	5ssIntronicRegion	Exclusion	shuffle.gc	early
TGCAGC	3.16739	1.68513	1.61986	5ssIntronicRegion	Exclusion	kcl.gc	early	-1.20441	0.439098	0.828841	5ssIntronicRegion	Exclusion	shuffle.gc	early
TTGTCA	3.16739	1.79157	1.64658	5ssIntronicRegion	Exclusion	kcl.gc	early	1.52563	0.42566	1.21323	5ssIntronicRegion	Exclusion	shuffle.gc	early
GTGATT	3.12076	1.47015	1.70084	5ssIntronicRegion	Exclusion	kcl.gc	early	3.16538	1.08065	1.5245	5ssIntronicRegion	Exclusion	shuffle.gc	early
ACAGGG	3.04227	1.43063	1.4714	5ssIntronicRegion	Exclusion	kcl.gc	early	1.91994	0.575514	1.23305	5ssIntronicRegion	Exclusion	shuffle.gc	early
CGAGGG	3.04062	1.52352	2.40305	5ssIntronicRegion	Exclusion	kcl.gc	early	1.54311	0.321182	1.31731	5ssIntronicRegion	Exclusion	shuffle.gc	early
TTGGAT	2.83396	1.41233	1.71885	5ssIntronicRegion	Exclusion	kcl.gc	early	0.0139034	0	1.01758	5ssIntronicRegion	Exclusion	shuffle.gc	early
AGGCTG	2.69791	1.37604	1.40278	5ssIntronicRegion	Exclusion	kcl.gc	early	1.68861	0.386776	1.15228	5ssIntronicRegion	Exclusion	shuffle.gc	early
CTGACT	2.67077	1.32995	1.42423	5ssIntronicRegion	Exclusion	kcl.gc	early	0.76318	0.354145	1.14585	5ssIntronicRegion	Exclusion	shuffle.gc	early
TTCACC	2.53796	1.44068	1.70847	5ssIntronicRegion	Exclusion	kcl.gc	early	-1.7302	0.594841	0.735422	5ssIntronicRegion	Exclusion	shuffle.gc	early
TCCTGG	2.47601	1.42476	1.40126	5ssIntronicRegion	Exclusion	kcl.gc	early	-1.86627	0.332776	0.881584	5ssIntronicRegion	Exclusion	shuffle.gc	early
GCCTGG	2.47601	1.42476	1.40126	5ssIntronicRegion	Exclusion	kcl.gc	early	-0.541961	0.24054	0.908163	5ssIntronicRegion	Exclusion	shuffle.gc	early
TTAGTT	2.21087	1.34398	1.51291	5ssIntronicRegion	Exclusion	kcl.gc	early	1.11735	0.15957	1.1013	5ssIntronicRegion	Exclusion	shuffle.gc	early
TTAGCG	7.33021	1.67635	8.82	5ssIntronicRegion	Exclusion	kcl.gc	late	-1.08119	0.139305	0.610998	5ssIntronicRegion	Exclusion	shuffle.gc	late
AGAGAG	6.81468	1.83526	1.60885	5ssIntronicRegion	Exclusion	kcl.gc	late	5.60981	0.925788	1.36692	5ssIntronicRegion	Exclusion	shuffle.gc	late
CCCAGT	6.41432	3.81029	2.28716	5ssIntronicRegion	Exclusion	kcl.gc	late	-2.92084	0.902533	0.695988	5ssIntronicRegion	Exclusion	shuffle.gc	late
ATGCGG	6.34805	1.41462	7.82435	5ssIntronicRegion	Exclusion	kcl.gc	late	2.08127	0.658546	2.4052	5ssIntronicRegion	Exclusion	shuffle.gc	late
TACGAA	6.34805	1.41462	7.82435	5ssIntronicRegion	Exclusion	kcl.gc	late	-0.714267	0	0.765275	5ssIntronicRegion	Exclusion	shuffle.gc	late
TGGGAC	6.30786	3.20277	2.13699	5ssIntronicRegion	Exclusion	kcl.gc	late	-1.92976	0.485337	0.788462	5ssIntronicRegion	Exclusion	shuffle.gc	late
GCGGGT	6.06657	2.16696	4.20681	5ssIntronicRegion	Exclusion	kcl.gc	late	-1.29883	0.321369	0.645511	5ssIntronicRegion	Exclusion	shuffle.gc	late
GACGAG	5.8523	1.42236	4.8998	5ssIntronicRegion	Exclusion	kcl.gc	late	1.81345	0.420012	1.80031	5ssIntronicRegion	Exclusion	shuffle.gc	late
GGCTGG	5.26171	1.64804	1.49534	5ssIntronicRegion	Exclusion	kcl.gc	late	3.71055	1.12234	1.36872	5ssIntronicRegion	Exclusion	shuffle.gc	late
CTTGGG	5.01036	2.28117	1.75073	5ssIntronicRegion	Exclusion	kcl.gc	late	-0.247583	0.156558	0.915114	5ssIntronicRegion	Exclusion	shuffle.gc	late
TCTCTG	4.82721	1.76379	1.47223	5ssIntronicRegion	Exclusion	kcl.gc	late	-1.11758	0.0920837	0.950452	5ssIntronicRegion	Exclusion	shuffle.gc	late
GTGGAC	4.82472	2.82376	2.53198	5ssIntronicRegion	Exclusion	kcl.gc	late	-0.52551	0.106526	0.911877	5ssIntronicRegion	Exclusion	shuffle.gc	late
TCCAGA	4.8104	2.07645	1.71275	5ssIntronicRegion	Exclusion	kcl.gc	late	1.89668	0.865483	1.35442	5ssIntronicRegion	Exclusion	shuffle.gc	late
CCAGTG	4.69647	2.10172	1.72821	5ssIntronicRegion	Exclusion	kcl.gc	late	1.14315	0.417764	1.19336	5ssIntronicRegion	Exclusion	shuffle.gc	late
AGGGCG	4.59331	1.52443	3.44343	5ssIntronicRegion	Exclusion	kcl.gc	late	-0.993967	0.190586	0.739244	5ssIntronicRegion	Exclusion	shuffle.gc	late
CGAGTG	4.52299	1.47739	2.79302	5ssIntronicRegion	Exclusion	kcl.gc	late	-1.13364	0.171034	0.781945	5ssIntronicRegion	Exclusion	shuffle.gc	late
CTCAGT	4.51753	2.12782	1.7444	5ssIntronicRegion	Exclusion	kcl.gc	late	-0.398502	0.0740097	1.04555	5ssIntronicRegion	Exclusion	shuffle.gc	late
TACAAA	4.44422	2.12292	1.98557	5ssIntronicRegion	Exclusion	kcl.gc	late	-0.844798	0.195789	0.889552	5ssIntronicRegion	Exclusion	shuffle.gc	late
ACCATT	4.4365	1.98397	2.0172	5ssIntronicRegion	Exclusion	kcl.gc	late	2.18025	0.881575	1.50094	5ssIntronicRegion	Exclusion	shuffle.gc	late
TGGCCC	4.41523	1.7974	1.72858	5ssIntronicRegion	Exclusion	kcl.gc	late	-0.457396	0.181137	0.905479	5ssIntronicRegion	Exclusion	shuffle.gc	late
GGGCCA	4.3978	1.98074	1.80884	5ssIntronicRegion	Exclusion	kcl.gc	late	1.36606	0.310337	1.20164	5ssIntronicRegion	Exclusion	shuffle.gc	late
CTCCAC	4.35401	1.85617	1.72092	5ssIntronicRegion	Exclusion	kcl.gc	late	0.646531	0.038233	0.958059	5ssIntronicRegion	Exclusion	shuffle.gc	late
ACTACC	4.27008	1.65945	2.236	5ssIntronicRegion	Exclusion	kcl.gc	late	-0.264047	0	0.964244	5ssIntronicRegion	Exclusion	shuffle.gc	late
CACAAC	4.19661	1.68472	2.13391	5ssIntronicRegion	Exclusion	kcl.gc	late	-0.2017	0	0.976787	5ssIntronicRegion	Exclusion	shuffle.gc	late
CTGTGG	4.18702	1.99683	1.55594	5ssIntronicRegion	Exclusion	kcl.gc	late	-2.26546	0.806255	0.786696	5ssIntronicRegion	Exclusion	shuffle.gc	late
GAATAC	4.17465	1.57005	2.25394	5ssIntronicRegion	Exclusion	kcl.gc	late	2.10915	0.63735	1.55708	5ssIntronicRegion	Exclusion	shuffle.gc	late
CCCTTA	4.15341	1.98074	1.80884	5ssIntronicRegion	Exclusion	kcl.gc	late	0.992587	0.29829	1.18994	5ssIntronicRegion	Exclusion	shuffle.gc	late
CGACCC	4.10222	1.32087	3.19103	5ssIntronicRegion	Exclusion	kcl.gc	late	-0.776513	0.0957048	0.792151	5ssIntronicRegion	Exclusion	shuffle.gc	late
CCGCAC	4.10222	1.46525	3.92757	5ssIntronicRegion	Exclusion	kcl.gc	late	-1.36918	0.218389	0.677596	5ssIntronicRegion	Exclusion	shuffle.gc	late
TCATTG	4.08572	1.5091	1.66715	5ssIntronicRegion	Exclusion	kcl.gc	late	2.57587	1.21039	1.59081	5ssIntronicRegion	Exclusion	shuffle.gc	late
GCCTAA	4.07919	1.48038	2.27634	5ssIntronicRegion	Exclusion	kcl.gc	late	0.426672	0.0558676	1.07209	5ssIntronicRegion	Exclusion	shuffle.gc	late
GGATGT	4.06615	2.12292	1.98557	5ssIntronicRegion	Exclusion	kcl.gc	late	2.84127	0.98156	1.54186	5ssIntronicRegion	Exclusion	shuffle.gc	late
TGGCAG	4.03784	1.81594	1.59773	5ssIntronicRegion	Exclusion	kcl.gc	late	-1.5025	0.245771	0.88667	5ssIntronicRegion	Exclusion	shuffle.gc	late
GGGACA	4.03315	2.06241	1.72118	5ssIntronicRegion	Exclusion	kcl.gc	late	-0.319782	0.0378805	0.959248	5ssIntronicRegion	Exclusion	shuffle.gc	late
CATTCC	4.02085	1.73903	1.73768	5ssIntronicRegion	Exclusion	kcl.gc	late	0.373038	0.0410604	1.05105	5ssIntronicRegion	Exclusion	shuffle.gc	late
ATCTAG	3.98655	1.65945	2.236	5ssIntronicRegion	Exclusion	kcl.gc	late	-0.891991	0.206794	0.821404	5ssIntronicRegion	Exclusion	shuffle.gc	late
CCTCAC	3.94336	1.74132	1.68894	5ssIntronicRegion	Exclusion	kcl.gc	late	1.56581	0.793578	1.3601	5ssIntronicRegion	Exclusion	shuffle.gc	late
TGGGGC	3.93318	1.42349	1.54254	5ssIntronicRegion	Exclusion	kcl.gc	late	-0.763166	0.0744914	0.947068	5ssIntronicRegion	Exclusion	shuffle.gc	late
CATGGT	3.89886	1.76878	1.70819	5ssIntronicRegion	Exclusion	kcl.gc	late	0.515344	0.126933	1.07389	5ssIntronicRegion	Exclusion	shuffle.gc	late
AGGCAT	3.88807	1.77517	1.66684	5ssIntronicRegion	Exclusion	kcl.gc	late	-0.972228	0.12319	0.917844	5ssIntronicRegion	Exclusion	shuffle.gc	late
ACAAAG	3.87688	1.71247	1.77398	5ssIntronicRegion	Exclusion	kcl.gc	late	0.866202	0	1.02412	5ssIntronicRegion	Exclusion	shuffle.gc	late
TGTTGT	3.8458	1.53615	1.50489	5ssIntronicRegion	Exclusion	kcl.gc	late	-0.697174	0.6184	0.802591	5ssIntronicRegion	Exclusion	shuffle.gc	late
ACCCCA	3.83675	1.37583	1.52525	5ssIntronicRegion	Exclusion	kcl.gc	late	0.776969	0.217529	1.11682	5ssIntronicRegion	Exclusion	shuffle.gc	late
ATATAG	3.7822	1.86417	2.125	5ssIntronicRegion	Exclusion	kcl.gc	late	-1.07935	0.241073	0.838151	5ssIntronicRegion	Exclusion	shuffle.gc	late
AGTGCC	3.76895	1.80162	1.78604	5ssIntronicRegion	Exclusion	kcl.gc	late	-1.28431	0.454877	0.798921	5ssIntronicRegion	Exclusion	shuffle.gc	late
TAAGAG	3.7488	1.62257	1.70234	5ssIntronicRegion	Exclusion	kcl.gc	late	1.81811	0.512254	1.29218	5ssIntronicRegion	Exclusion	shuffle.gc	late
ACTTGG	3.73737	1.41363	1.59384	5ssIntronicRegion	Exclusion	kcl.gc	late	2.68889	0.865728	1.38112	5ssIntronicRegion	Exclusion	shuffle.gc	late
TAATGC	3.70524	1.79896	2.00853	5ssIntronicRegion	Exclusion	kcl.gc	late	0.212495	0.165534	1.14464	5ssIntronicRegion	Exclusion	shuffle.gc	late
CAGTAA	3.66204	1.43325	1.92534	5ssIntronicRegion	Exclusion	kcl.gc	late	0.857826	0.183645	1.17028	5ssIntronicRegion	Exclusion	shuffle.gc	late
CCAACT	3.56111	1.30796	1.77817	5ssIntronicRegion	Exclusion	kcl.gc	late	0.600943	0.168724	1.14897	5ssIntronicRegion	Exclusion	shuffle.gc	late
TTAGTC	3.54398	1.77454	2.12886	5ssIntronicRegion	Exclusion	kcl.gc	late	-2.64607	1.13799	0.564291	5ssIntronicRegion	Exclusion	shuffle.gc	late
TTACAA	3.49583	1.62039	1.90882	5ssIntronicRegion	Exclusion	kcl.gc	late	1.90242	0.510802	1.32891	5ssIntronicRegion	Exclusion	shuffle.gc	late
ACCCAC	3.47914	1.68991	1.81943	5ssIntronicRegion	Exclusion	kcl.gc	late	-0.110279	0	1.02391	5ssIntronicRegion	Exclusion	shuffle.gc	late
GGGACC	3.47914	1.53497	1.74828	5ssIntronicRegion	Exclusion	kcl.gc	late	-2.3739	1.04727	0.653421	5ssIntronicRegion	Exclusion	shuffle.gc	late
TCCACT	3.47914	1.87039	1.84131	5ssIntronicRegion	Exclusion	kcl.gc	late	-0.23501	0	0.99774	5ssIntronicRegion	Exclusion	shuffle.gc	late
AAAGGG	3.46945	1.68109	1.7485	5ssIntronicRegion	Exclusion	kcl.gc	late	0.844898	0.0873374	1.0802	5ssIntronicRegion	Exclusion	shuffle.gc	late
TAATTC	3.42921	1.38961	1.6822	5ssIntronicRegion	Exclusion	kcl.gc	late	-1.75948	0.731221	0.719373	5ssIntronicRegion	Exclusion	shuffle.gc	late
TAGAGA	3.42213	1.37156	1.56298	5ssIntronicRegion	Exclusion	kcl.gc	late	0.942314	0.338411	1.17391	5ssIntronicRegion	Exclusion	shuffle.gc	late
GTCTGT	3.39687	1.31815	1.47301	5ssIntronicRegion	Exclusion	kcl.gc	late	-0.311785	0.10738	1.06174	5ssIntronicRegion	Exclusion	shuffle.gc	late
TACCCC	3.33577	1.43607	1.83433	5ssIntronicRegion	Exclusion	kcl.gc	late	0.615704	0.172108	1.15365	5ssIntronicRegion	Exclusion	shuffle.gc	late
AGACTA	3.31002	1.56658	1.77687	5ssIntronicRegion	Exclusion	kcl.gc	late	2.54693	1.00151	1.5598	5ssIntronicRegion	Exclusion	shuffle.gc	late
TACTGT	3.30377	1.3309	1.57835	5ssIntronicRegion	Exclusion	kcl.gc	late	0.0748438	0.0401812	1.05006	5ssIntronicRegion	Exclusion	shuffle.gc	late
TCTGTC	3.24572	1.41716	1.46786	5ssIntronicRegion	Exclusion	kcl.gc	late	-0.286465	0	0.994141	5ssIntronicRegion	Exclusion	shuffle.gc	late
CCAGTC	3.24342	1.62257	1.70234	5ssIntronicRegion	Exclusion	kcl.gc	late	-0.559403	0	0.995726	5ssIntronicRegion	Exclusion	shuffle.gc	late
CAGTCT	3.24342	1.48366	1.64715	5ssIntronicRegion	Exclusion	kcl.gc	late	-0.857921	0.385474	0.819273	5ssIntronicRegion	Exclusion	shuffle.gc	late
TGCTGT	3.18589	1.95865	1.56658	5ssIntronicRegion	Exclusion	kcl.gc	late	1.54789	0.399283	1.16744	5ssIntronicRegion	Exclusion	shuffle.gc	late
CCCTTG	3.15936	1.35812	1.51354	5ssIntronicRegion	Exclusion	kcl.gc	late	-0.319782	0.0378849	1.02477	5ssIntronicRegion	Exclusion	shuffle.gc	late
GTTATA	3.15726	1.39919	1.84608	5ssIntronicRegion	Exclusion	kcl.gc	late	-1.80596	0.633932	0.715809	5ssIntronicRegion	Exclusion	shuffle.gc	late
AGTGTT	3.14894	1.87699	1.67381	5ssIntronicRegion	Exclusion	kcl.gc	late	-1.36406	0.209219	0.891345	5ssIntronicRegion	Exclusion	shuffle.gc	late
ACCCTG	3.14894	2.01284	1.71657	5ssIntronicRegion	Exclusion	kcl.gc	late	-0.0252061	0.117731	1.06782	5ssIntronicRegion	Exclusion	shuffle.gc	late
GCTAAC	3.1474	1.39038	2.30464	5ssIntronicRegion	Exclusion	kcl.gc	late	0.500059	0.0720619	1.10385	5ssIntronicRegion	Exclusion	shuffle.gc	late
GCGGGG	3.14659	1.3535	2.06181	5ssIntronicRegion	Exclusion	kcl.gc	late	1.16591	0.392798	1.3569	5ssIntronicRegion	Exclusion	shuffle.gc	late
TTGGGA	3.14419	1.45457	1.52419	5ssIntronicRegion	Exclusion	kcl.gc	late	1.92003	0.81441	1.3237	5ssIntronicRegion	Exclusion	shuffle.gc	late
CACAGA	3.14395	1.34601	1.49092	5ssIntronicRegion	Exclusion	kcl.gc	late	0.867489	0.252707	1.12801	5ssIntronicRegion	Exclusion	shuffle.gc	late
GGCATT	3.14006	1.45931	1.62834	5ssIntronicRegion	Exclusion	kcl.gc	late	-1.32952	0.294238	0.861709	5ssIntronicRegion	Exclusion	shuffle.gc	late
ACTGCC	3.09143	1.70979	1.7157	5ssIntronicRegion	Exclusion	kcl.gc	late	-0.621508	0.0397646	0.952813	5ssIntronicRegion	Exclusion	shuffle.gc	late
GCACCA	3.077	1.36395	1.80568	5ssIntronicRegion	Exclusion	kcl.gc	late	2.23355	0.9597	1.57533	5ssIntronicRegion	Exclusion	shuffle.gc	late
CCTGTA	3.02464	1.3309	1.57835	5ssIntronicRegion	Exclusion	kcl.gc	late	0.851697	0.24036	1.16202	5ssIntronicRegion	Exclusion	shuffle.gc	late
CCTTGC	2.98455	1.43297	1.56387	5ssIntronicRegion	Exclusion	kcl.gc	late	1.53922	0.605223	1.28069	5ssIntronicRegion	Exclusion	shuffle.gc	late
AGGAGC	2.98455	1.41322	1.55037	5ssIntronicRegion	Exclusion	kcl.gc	late	1.77154	0.438273	1.20739	5ssIntronicRegion	Exclusion	shuffle.gc	late
GAGACT	2.80087	1.31017	1.56242	5ssIntronicRegion	Exclusion	kcl.gc	late	3.00645	0.840839	1.4244	5ssIntronicRegion	Exclusion	shuffle.gc	late
AACCCT	2.64556	1.6818	1.69502	5ssIntronicRegion	Exclusion	kcl.gc	late	2.07205	1.09777	1.47697	5ssIntronicRegion	Exclusion	shuffle.gc	late
TGAGTT	2.58079	1.34422	1.42679	5ssIntronicRegion	Exclusion	kcl.gc	late	-0.585005	0	0.99572	5ssIntronicRegion	Exclusion	shuffle.gc	late
CTTTAG	2.49024	1.41363	1.59384	5ssIntronicRegion	Exclusion	kcl.gc	late	1.97799	0.744502	1.38395	5ssIntronicRegion	Exclusion	shuffle.gc	late
GGTCTA	2.08556	1.38815	1.87051	5ssIntronicRegion	Exclusion	kcl.gc	late	-0.934461	0	0.97868	5ssIntronicRegion	Exclusion	shuffle.gc	late
CAACCC	1.57293	2.04305	2.12008	5ssIntronicRegion	Exclusion	kcl.gc	late	-1.11282	0.0497477	1.06244	5ssIntronicRegion	Exclusion	shuffle.gc	late
TCTTCG	11.0044	3.66747	34.0506	3ssExonicRegion	Inclusion	kcl.gc	early	-1.67131	0	0	3ssExonicRegion	Inclusion	shuffle.gc	early
ATGTGG	8.82294	3.51503	13.7436	3ssExonicRegion	Inclusion	kcl.gc	early	0.964034	0.691513	2.23016	3ssExonicRegion	Inclusion	shuffle.gc	early
ACAAAA	7.61429	4.23437	11.2421	3ssExonicRegion	Inclusion	kcl.gc	early	0.141947	0.142452	1.32381	3ssExonicRegion	Inclusion	shuffle.gc	early
AAGGAA	5.99384	3.16	6.19883	3ssExonicRegion	Inclusion	kcl.gc	early	1.97622	0.602594	2.24498	3ssExonicRegion	Inclusion	shuffle.gc	early
CGAATC	5.93812	2.06692	19.9259	3ssExonicRegion	Inclusion	kcl.gc	early	-1.45783	0	0	3ssExonicRegion	Inclusion	shuffle.gc	early
CATTCT	5.93812	2.06692	19.9259	3ssExonicRegion	Inclusion	kcl.gc	early	-1.42125	0	0	3ssExonicRegion	Inclusion	shuffle.gc	early
CTACAT	5.93812	2.06692	19.9259	3ssExonicRegion	Inclusion	kcl.gc	early	-1.45783	0	0	3ssExonicRegion	Inclusion	shuffle.gc	early
CCAATA	5.93812	2.06692	19.9259	3ssExonicRegion	Inclusion	kcl.gc	early	-1.4458	0	0	3ssExonicRegion	Inclusion	shuffle.gc	early
AAACTC	5.89779	2.79495	11.308	3ssExonicRegion	Inclusion	kcl.gc	early	-0.299997	0.240743	1.31628	3ssExonicRegion	Inclusion	shuffle.gc	early
ACCTTT	4.91033	2.49135	8.46519	3ssExonicRegion	Inclusion	kcl.gc	early	-1.45783	0	0	3ssExonicRegion	Inclusion	shuffle.gc	early
ATCCCA	4.72131	2.62227	6.83333	3ssExonicRegion	Inclusion	kcl.gc	early	0.10994	0.189692	1.46928	3ssExonicRegion	Inclusion	shuffle.gc	early
TACCTT	4.43521	1.45667	6.61728	3ssExonicRegion	Inclusion	kcl.gc	early	-1.41571	0	0	3ssExonicRegion	Inclusion	shuffle.gc	early
ACACAA	4.43521	2.1057	8.93333	3ssExonicRegion	Inclusion	kcl.gc	early	0.10994	0.189692	1.46928	3ssExonicRegion	Inclusion	shuffle.gc	early
ATCTTT	4.43521	2.1057	8.93333	3ssExonicRegion	Inclusion	kcl.gc	early	-0.433235	0	1.09496	3ssExonicRegion	Inclusion	shuffle.gc	early
AGAAGA	4.36095	2.32905	3.33333	3ssExonicRegion	Inclusion	kcl.gc	early	-0.563176	0	0.934596	3ssExonicRegion	Inclusion	shuffle.gc	early
TTCTTC	4.21545	2.23878	6.75949	3ssExonicRegion	Inclusion	kcl.gc	early	0.254632	0.201313	1.65588	3ssExonicRegion	Inclusion	shuffle.gc	early
TTTCAG	4.21545	2.23878	6.75949	3ssExonicRegion	Inclusion	kcl.gc	early	1.65875	0.984216	3.3631	3ssExonicRegion	Inclusion	shuffle.gc	early
GAAGAG	4.18351	2.57289	3.69844	3ssExonicRegion	Inclusion	kcl.gc	early	-1.55835	0.468243	0.30454	3ssExonicRegion	Inclusion	shuffle.gc	early
AAGAAA	4.11774	2.08707	3.99242	3ssExonicRegion	Inclusion	kcl.gc	early	1.6014	0.997257	2.70361	3ssExonicRegion	Inclusion	shuffle.gc	early
TTATTA	3.91981	1.71349	9.94444	3ssExonicRegion	Inclusion	kcl.gc	early	0.353751	0.459699	3.30814	3ssExonicRegion	Inclusion	shuffle.gc	early
TCTATT	3.91981	1.71349	9.94444	3ssExonicRegion	Inclusion	kcl.gc	early	-1.42125	0	0	3ssExonicRegion	Inclusion	shuffle.gc	early
ATATTT	3.91981	1.71349	9.94444	3ssExonicRegion	Inclusion	kcl.gc	early	-0.548657	0	1.09496	3ssExonicRegion	Inclusion	shuffle.gc	early
TTCTAA	3.91981	1.71349	9.94444	3ssExonicRegion	Inclusion	kcl.gc	early	-1.45783	0	0	3ssExonicRegion	Inclusion	shuffle.gc	early
GTAAAC	3.91981	1.71349	9.94444	3ssExonicRegion	Inclusion	kcl.gc	early	-1.42125	0	0	3ssExonicRegion	Inclusion	shuffle.gc	early
TTTGTA	3.91981	1.71349	9.94444	3ssExonicRegion	Inclusion	kcl.gc	early	1.54265	0.878149	4.4549	3ssExonicRegion	Inclusion	shuffle.gc	early
GTACAT	3.91981	1.71349	9.94444	3ssExonicRegion	Inclusion	kcl.gc	early	-1.45783	0	0	3ssExonicRegion	Inclusion	shuffle.gc	early
TCCCGT	3.91981	1.71349	9.94444	3ssExonicRegion	Inclusion	kcl.gc	early	-0.140218	0.293243	1.64826	3ssExonicRegion	Inclusion	shuffle.gc	early
CCCGAA	3.91981	1.71349	9.94444	3ssExonicRegion	Inclusion	kcl.gc	early	-1.41571	0	0	3ssExonicRegion	Inclusion	shuffle.gc	early
ATCCAT	3.80974	2.20908	5.10577	3ssExonicRegion	Inclusion	kcl.gc	early	-0.982604	0	0.541667	3ssExonicRegion	Inclusion	shuffle.gc	early
CATCTT	3.68705	2.02388	5.62236	3ssExonicRegion	Inclusion	kcl.gc	early	-0.829436	0	0.652326	3ssExonicRegion	Inclusion	shuffle.gc	early
CAGCCT	3.6559	2.23682	4.36364	3ssExonicRegion	Inclusion	kcl.gc	early	-1.01195	0.120482	0.587166	3ssExonicRegion	Inclusion	shuffle.gc	early
TCAGAA	3.6559	2.40081	4.80909	3ssExonicRegion	Inclusion	kcl.gc	early	1.46524	0.776681	2.26016	3ssExonicRegion	Inclusion	shuffle.gc	early
GAAGAA	3.65431	2.32905	3.33333	3ssExonicRegion	Inclusion	kcl.gc	early	0.190482	0.230524	1.27814	3ssExonicRegion	Inclusion	shuffle.gc	early
TTTCTT	3.64368	1.85152	6.6875	3ssExonicRegion	Inclusion	kcl.gc	early	0.636604	0.383851	1.81818	3ssExonicRegion	Inclusion	shuffle.gc	early
GTAACA	3.64368	1.85152	6.6875	3ssExonicRegion	Inclusion	kcl.gc	early	-0.140218	0.293243	1.64826	3ssExonicRegion	Inclusion	shuffle.gc	early
ATTCCT	3.64368	1.85152	6.6875	3ssExonicRegion	Inclusion	kcl.gc	early	-1.47923	0	0	3ssExonicRegion	Inclusion	shuffle.gc	early
TTTACC	3.40496	1.30782	13.122	3ssExonicRegion	Inclusion	kcl.gc	early	-1.41571	0	0	3ssExonicRegion	Inclusion	shuffle.gc	early
TTAACT	3.40496	1.30782	13.122	3ssExonicRegion	Inclusion	kcl.gc	early	-1.67131	0	0	3ssExonicRegion	Inclusion	shuffle.gc	early
AGTTAA	3.40496	1.30782	13.122	3ssExonicRegion	Inclusion	kcl.gc	early	1.14081	0.739942	3.33529	3ssExonicRegion	Inclusion	shuffle.gc	early
ATACAT	3.40496	1.30782	13.122	3ssExonicRegion	Inclusion	kcl.gc	early	0	0.878707	Inf	3ssExonicRegion	Inclusion	shuffle.gc	early
CTTCGA	3.40496	1.30782	13.122	3ssExonicRegion	Inclusion	kcl.gc	early	0.890616	0.607074	6.62791	3ssExonicRegion	Inclusion	shuffle.gc	early
TCCGGT	3.40496	1.30782	13.122	3ssExonicRegion	Inclusion	kcl.gc	early	-1.67131	0	0	3ssExonicRegion	Inclusion	shuffle.gc	early
GTTATT	3.40496	1.30782	13.122	3ssExonicRegion	Inclusion	kcl.gc	early	-1.45783	0	0	3ssExonicRegion	Inclusion	shuffle.gc	early
GCCAAT	3.40496	1.30782	13.122	3ssExonicRegion	Inclusion	kcl.gc	early	0.0634674	0.362796	2.20155	3ssExonicRegion	Inclusion	shuffle.gc	early
ATTAAT	3.40496	1.30782	13.122	3ssExonicRegion	Inclusion	kcl.gc	early	-1.41571	0	0	3ssExonicRegion	Inclusion	shuffle.gc	early
TACCAA	3.40496	1.30782	13.122	3ssExonicRegion	Inclusion	kcl.gc	early	-1.67131	0	0	3ssExonicRegion	Inclusion	shuffle.gc	early
AACCTA	3.40496	1.30782	13.122	3ssExonicRegion	Inclusion	kcl.gc	early	0	0.878707	Inf	3ssExonicRegion	Inclusion	shuffle.gc	early
AATATT	3.40496	1.30782	13.122	3ssExonicRegion	Inclusion	kcl.gc	early	-0.140218	0.293243	1.64826	3ssExonicRegion	Inclusion	shuffle.gc	early
CGGTGA	3.40496	1.30782	13.122	3ssExonicRegion	Inclusion	kcl.gc	early	0	0.878707	Inf	3ssExonicRegion	Inclusion	shuffle.gc	early
AGTAAC	3.40496	1.30782	13.122	3ssExonicRegion	Inclusion	kcl.gc	early	-1.45783	0	0	3ssExonicRegion	Inclusion	shuffle.gc	early
TCACGA	3.40496	1.30782	13.122	3ssExonicRegion	Inclusion	kcl.gc	early	-1.41571	0	0	3ssExonicRegion	Inclusion	shuffle.gc	early
AATTTC	3.40496	1.30782	13.122	3ssExonicRegion	Inclusion	kcl.gc	early	-0.140218	0.293243	1.64826	3ssExonicRegion	Inclusion	shuffle.gc	early
TTCCCG	3.40496	1.30782	13.122	3ssExonicRegion	Inclusion	kcl.gc	early	0.353751	0.459699	3.30814	3ssExonicRegion	Inclusion	shuffle.gc	early
AGCTAG	3.40496	1.30782	13.122	3ssExonicRegion	Inclusion	kcl.gc	early	-1.41571	0	0	3ssExonicRegion	Inclusion	shuffle.gc	early
TTAAGT	3.40496	1.30782	13.122	3ssExonicRegion	Inclusion	kcl.gc	early	0.0634674	0.362796	2.20155	3ssExonicRegion	Inclusion	shuffle.gc	early
ATATTC	3.40496	1.30782	13.122	3ssExonicRegion	Inclusion	kcl.gc	early	-1.67131	0	0	3ssExonicRegion	Inclusion	shuffle.gc	early
CACGTC	3.40496	1.30782	13.122	3ssExonicRegion	Inclusion	kcl.gc	early	-1.41571	0	0	3ssExonicRegion	Inclusion	shuffle.gc	early
ATATCC	3.40496	1.30782	13.122	3ssExonicRegion	Inclusion	kcl.gc	early	0.890616	0.607074	6.62791	3ssExonicRegion	Inclusion	shuffle.gc	early
AAGGCG	3.40496	1.30782	13.122	3ssExonicRegion	Inclusion	kcl.gc	early	0.353751	0.459699	3.30814	3ssExonicRegion	Inclusion	shuffle.gc	early
GCATTA	3.40496	1.30782	13.122	3ssExonicRegion	Inclusion	kcl.gc	early	0.353751	0.459699	3.30814	3ssExonicRegion	Inclusion	shuffle.gc	early
GCGAAT	3.40496	1.30782	13.122	3ssExonicRegion	Inclusion	kcl.gc	early	0	0	NA	3ssExonicRegion	Inclusion	shuffle.gc	early
TTATTG	3.40496	1.30782	13.122	3ssExonicRegion	Inclusion	kcl.gc	early	0	0.878707	Inf	3ssExonicRegion	Inclusion	shuffle.gc	early
CTGGAC	3.26438	1.83799	4.81013	3ssExonicRegion	Inclusion	kcl.gc	early	-1.35457	0.306496	0.357235	3ssExonicRegion	Inclusion	shuffle.gc	early
TGAAAG	3.26438	1.83799	4.81013	3ssExonicRegion	Inclusion	kcl.gc	early	0.791122	0.402333	2.00357	3ssExonicRegion	Inclusion	shuffle.gc	early
CCTGAA	3.26438	1.83799	4.81013	3ssExonicRegion	Inclusion	kcl.gc	early	-1.68115	0.425572	0	3ssExonicRegion	Inclusion	shuffle.gc	early
AGGATG	3.14403	1.94975	3.67832	3ssExonicRegion	Inclusion	kcl.gc	early	-1.11844	0.15111	0.462625	3ssExonicRegion	Inclusion	shuffle.gc	early
ACATCT	3.0825	1.6429	5.34	3ssExonicRegion	Inclusion	kcl.gc	early	1.14081	0.739942	3.33529	3ssExonicRegion	Inclusion	shuffle.gc	early
GAGTCA	3.0825	1.6429	5.34	3ssExonicRegion	Inclusion	kcl.gc	early	-0.548657	0	0.936877	3ssExonicRegion	Inclusion	shuffle.gc	early
GCCTTG	3.0825	1.6429	5.34	3ssExonicRegion	Inclusion	kcl.gc	early	-1.55714	0.217707	0	3ssExonicRegion	Inclusion	shuffle.gc	early
TTCTCA	3.0825	1.6429	5.34	3ssExonicRegion	Inclusion	kcl.gc	early	0.964034	0.691513	2.23016	3ssExonicRegion	Inclusion	shuffle.gc	early
GTGCCC	3.0825	1.85152	6.6875	3ssExonicRegion	Inclusion	kcl.gc	early	0.636604	0.402333	2.00357	3ssExonicRegion	Inclusion	shuffle.gc	early
CAAAAG	3.0825	1.6429	5.34	3ssExonicRegion	Inclusion	kcl.gc	early	-0.829436	0	0.652326	3ssExonicRegion	Inclusion	shuffle.gc	early
TCTTTC	3.0825	1.6429	5.34	3ssExonicRegion	Inclusion	kcl.gc	early	1.65875	0.984216	3.3631	3ssExonicRegion	Inclusion	shuffle.gc	early
ATTTTA	2.97264	1.45667	6.61728	3ssExonicRegion	Inclusion	kcl.gc	early	1.14081	0.739942	3.33529	3ssExonicRegion	Inclusion	shuffle.gc	early
AGCCTA	2.97264	1.45667	6.61728	3ssExonicRegion	Inclusion	kcl.gc	early	-1.4458	0	0	3ssExonicRegion	Inclusion	shuffle.gc	early
GAATTT	2.97264	1.45667	6.61728	3ssExonicRegion	Inclusion	kcl.gc	early	-1.41571	0	0	3ssExonicRegion	Inclusion	shuffle.gc	early
TACATG	2.97264	1.45667	6.61728	3ssExonicRegion	Inclusion	kcl.gc	early	-1.42125	0	0	3ssExonicRegion	Inclusion	shuffle.gc	early
ATTCTC	2.97264	1.45667	6.61728	3ssExonicRegion	Inclusion	kcl.gc	early	-0.299997	0.240743	1.31628	3ssExonicRegion	Inclusion	shuffle.gc	early
CACAAC	2.97264	1.45667	6.61728	3ssExonicRegion	Inclusion	kcl.gc	early	-1.42125	0	0	3ssExonicRegion	Inclusion	shuffle.gc	early
AATTTG	2.97264	1.45667	6.61728	3ssExonicRegion	Inclusion	kcl.gc	early	-0.140218	0.293243	1.64826	3ssExonicRegion	Inclusion	shuffle.gc	early
GCCTAG	2.97264	1.45667	6.61728	3ssExonicRegion	Inclusion	kcl.gc	early	-1.45783	0	0	3ssExonicRegion	Inclusion	shuffle.gc	early
AAGTCC	2.97264	1.45667	6.61728	3ssExonicRegion	Inclusion	kcl.gc	early	-1.42125	0	0	3ssExonicRegion	Inclusion	shuffle.gc	early
TTGTAA	2.97264	1.45667	6.61728	3ssExonicRegion	Inclusion	kcl.gc	early	-1.47923	0	0	3ssExonicRegion	Inclusion	shuffle.gc	early
GGTATC	2.97264	1.45667	6.61728	3ssExonicRegion	Inclusion	kcl.gc	early	0.353751	0.459699	3.30814	3ssExonicRegion	Inclusion	shuffle.gc	early
ACAGCT	2.91401	1.6752	4.20095	3ssExonicRegion	Inclusion	kcl.gc	early	-1.11844	0.15111	0.462625	3ssExonicRegion	Inclusion	shuffle.gc	early
AACAAA	2.91401	1.6752	4.20095	3ssExonicRegion	Inclusion	kcl.gc	early	-0.242898	0	1.09608	3ssExonicRegion	Inclusion	shuffle.gc	early
GAATCC	2.6528	1.4675	4.44167	3ssExonicRegion	Inclusion	kcl.gc	early	0.612757	0.543225	2.21569	3ssExonicRegion	Inclusion	shuffle.gc	early
CACCAA	2.6528	1.4675	4.44167	3ssExonicRegion	Inclusion	kcl.gc	early	-0.829436	0	0.652326	3ssExonicRegion	Inclusion	shuffle.gc	early
GAATCT	2.6528	1.4675	4.44167	3ssExonicRegion	Inclusion	kcl.gc	early	-1.51707	0.220027	0	3ssExonicRegion	Inclusion	shuffle.gc	early
CCACAA	2.6528	1.4675	4.44167	3ssExonicRegion	Inclusion	kcl.gc	early	-0.433235	0	1.09496	3ssExonicRegion	Inclusion	shuffle.gc	early
ATGAAT	2.6528	1.4675	4.44167	3ssExonicRegion	Inclusion	kcl.gc	early	-0.0191572	0.177012	1.32	3ssExonicRegion	Inclusion	shuffle.gc	early
TTGGTC	2.6528	1.4675	4.44167	3ssExonicRegion	Inclusion	kcl.gc	early	-0.829436	0	0.652326	3ssExonicRegion	Inclusion	shuffle.gc	early
GGATGT	2.6528	1.4675	4.44167	3ssExonicRegion	Inclusion	kcl.gc	early	-0.744154	0	0.726098	3ssExonicRegion	Inclusion	shuffle.gc	early
ACCACA	2.61579	1.53123	3.72714	3ssExonicRegion	Inclusion	kcl.gc	early	-1.05236	0	0.499106	3ssExonicRegion	Inclusion	shuffle.gc	early
CCTCCC	2.4413	1.61425	3.37821	3ssExonicRegion	Inclusion	kcl.gc	early	-1.50979	0.468207	0.320349	3ssExonicRegion	Inclusion	shuffle.gc	early
GAGGAT	2.35675	1.4029	3.3481	3ssExonicRegion	Inclusion	kcl.gc	early	-0.548657	0	0.936877	3ssExonicRegion	Inclusion	shuffle.gc	early
CAAGGC	2.35675	1.4029	3.3481	3ssExonicRegion	Inclusion	kcl.gc	early	-1.76306	0.628838	0	3ssExonicRegion	Inclusion	shuffle.gc	early
GAAGTC	2.30683	1.31744	3.8	3ssExonicRegion	Inclusion	kcl.gc	early	-0.0191572	0.177012	1.32	3ssExonicRegion	Inclusion	shuffle.gc	early
TCCCAC	2.30683	1.31744	3.8	3ssExonicRegion	Inclusion	kcl.gc	early	-0.548657	0	0.936877	3ssExonicRegion	Inclusion	shuffle.gc	early
ACCAAG	2.30683	1.31744	3.8	3ssExonicRegion	Inclusion	kcl.gc	early	-1.72231	0.416779	0	3ssExonicRegion	Inclusion	shuffle.gc	early
TGGCAC	2.30683	1.31744	3.8	3ssExonicRegion	Inclusion	kcl.gc	early	-1.51707	0.220027	0	3ssExonicRegion	Inclusion	shuffle.gc	early
CACTTG	2.30683	1.31744	3.8	3ssExonicRegion	Inclusion	kcl.gc	early	-1.55714	0.217707	0	3ssExonicRegion	Inclusion	shuffle.gc	early
TCAGAT	2.01829	1.31744	3.8	3ssExonicRegion	Inclusion	kcl.gc	early	-0.651255	0	0.818314	3ssExonicRegion	Inclusion	shuffle.gc	early
AGCTAC	10.4888	4.46054	19	3ssExonicRegion	Inclusion	kcl.gc	late	0.0923357	0.347673	2.29018	3ssExonicRegion	Inclusion	shuffle.gc	late
ATTGAA	6.02444	2.52207	11.5421	3ssExonicRegion	Inclusion	kcl.gc	late	-1.76137	0.426198	0	3ssExonicRegion	Inclusion	shuffle.gc	late
AACTTG	6.02444	2.52207	11.5421	3ssExonicRegion	Inclusion	kcl.gc	late	-1.52493	0.228147	0	3ssExonicRegion	Inclusion	shuffle.gc	late
CGCCAT	4.78595	1.67462	13.6239	3ssExonicRegion	Inclusion	kcl.gc	late	1.60195	0.82314	4.62162	3ssExonicRegion	Inclusion	shuffle.gc	late
AATACA	4.78595	1.67462	13.6239	3ssExonicRegion	Inclusion	kcl.gc	late	0	0	NA	3ssExonicRegion	Inclusion	shuffle.gc	late
CCGTAA	4.78595	1.67462	13.6239	3ssExonicRegion	Inclusion	kcl.gc	late	-0.195065	0.260674	1.52381	3ssExonicRegion	Inclusion	shuffle.gc	late
CTTGTA	4.78595	1.67462	13.6239	3ssExonicRegion	Inclusion	kcl.gc	late	-1.41728	0	0	3ssExonicRegion	Inclusion	shuffle.gc	late
TACTAA	4.78595	1.67462	13.6239	3ssExonicRegion	Inclusion	kcl.gc	late	-1.42768	0	0	3ssExonicRegion	Inclusion	shuffle.gc	late
AGGTCT	4.78595	1.67462	13.6239	3ssExonicRegion	Inclusion	kcl.gc	late	-0.195065	0.260674	1.52381	3ssExonicRegion	Inclusion	shuffle.gc	late
TAATGT	4.78595	1.67462	13.6239	3ssExonicRegion	Inclusion	kcl.gc	late	-0.195065	0.260674	1.52381	3ssExonicRegion	Inclusion	shuffle.gc	late
TACCTC	4.78595	1.67462	13.6239	3ssExonicRegion	Inclusion	kcl.gc	late	-1.58335	0.223452	0	3ssExonicRegion	Inclusion	shuffle.gc	late
AACTCA	4.64466	2.16505	7.67913	3ssExonicRegion	Inclusion	kcl.gc	late	-1.70255	0.441265	0	3ssExonicRegion	Inclusion	shuffle.gc	late
CAGCTA	4.64466	2.16505	7.67913	3ssExonicRegion	Inclusion	kcl.gc	late	1.03159	0.679474	2.31364	3ssExonicRegion	Inclusion	shuffle.gc	late
ACAAGG	4.64466	2.16505	7.67913	3ssExonicRegion	Inclusion	kcl.gc	late	1.03159	0.679474	2.31364	3ssExonicRegion	Inclusion	shuffle.gc	late
AAAGGA	4.53777	2.69849	4.72816	3ssExonicRegion	Inclusion	kcl.gc	late	-0.80097	0	0.695773	3ssExonicRegion	Inclusion	shuffle.gc	late
TGGTAC	4.53633	1.91555	9.14815	3ssExonicRegion	Inclusion	kcl.gc	late	-1.52493	0.228147	0	3ssExonicRegion	Inclusion	shuffle.gc	late
TACAAG	4.53633	1.3391	6.79817	3ssExonicRegion	Inclusion	kcl.gc	late	1.60195	0.82314	4.62162	3ssExonicRegion	Inclusion	shuffle.gc	late
AGTTTA	4.53633	1.91555	9.14815	3ssExonicRegion	Inclusion	kcl.gc	late	-0.403163	0	1.14062	3ssExonicRegion	Inclusion	shuffle.gc	late
ATGTGG	4.11404	2.14526	5.55849	3ssExonicRegion	Inclusion	kcl.gc	late	-1.04964	0	0.501984	3ssExonicRegion	Inclusion	shuffle.gc	late
AAACAA	3.83617	1.38925	3.06289	3ssExonicRegion	Inclusion	kcl.gc	late	-0.897074	0	0.755255	3ssExonicRegion	Inclusion	shuffle.gc	late
TGTGAT	3.78486	1.8815	5.74766	3ssExonicRegion	Inclusion	kcl.gc	late	-1.76137	0.426198	0	3ssExonicRegion	Inclusion	shuffle.gc	late
AAGAAA	3.56608	1.35588	2.64835	3ssExonicRegion	Inclusion	kcl.gc	late	-0.00570157	0.118752	1.22324	3ssExonicRegion	Inclusion	shuffle.gc	late
AAGGAA	3.51843	1.73448	3.10256	3ssExonicRegion	Inclusion	kcl.gc	late	-0.637122	0	0.79893	3ssExonicRegion	Inclusion	shuffle.gc	late
ACCAGA	3.49268	1.97504	4.06667	3ssExonicRegion	Inclusion	kcl.gc	late	-0.835991	0	0.647959	3ssExonicRegion	Inclusion	shuffle.gc	late
CATAGA	3.4296	1.61378	6.08642	3ssExonicRegion	Inclusion	kcl.gc	late	1.60195	0.82314	4.62162	3ssExonicRegion	Inclusion	shuffle.gc	late
AGAATT	3.4296	1.61378	6.08642	3ssExonicRegion	Inclusion	kcl.gc	late	1.73184	0.942406	3.48409	3ssExonicRegion	Inclusion	shuffle.gc	late
AGCATA	3.4296	1.61378	6.08642	3ssExonicRegion	Inclusion	kcl.gc	late	-0.570111	0	0.910714	3ssExonicRegion	Inclusion	shuffle.gc	late
TGTTGT	3.4296	1.61378	6.08642	3ssExonicRegion	Inclusion	kcl.gc	late	-0.403163	0	1.14062	3ssExonicRegion	Inclusion	shuffle.gc	late
AATCCC	3.4296	1.61378	6.08642	3ssExonicRegion	Inclusion	kcl.gc	late	0.384709	0.21095	1.83784	3ssExonicRegion	Inclusion	shuffle.gc	late
TAAAGA	3.4296	1.61378	6.08642	3ssExonicRegion	Inclusion	kcl.gc	late	0.664338	0.529824	2.3018	3ssExonicRegion	Inclusion	shuffle.gc	late
CATGGT	3.17282	1.6488	4.58879	3ssExonicRegion	Inclusion	kcl.gc	late	0.384709	0.21095	1.83784	3ssExonicRegion	Inclusion	shuffle.gc	late
AAGCTA	3.17282	1.6488	4.58879	3ssExonicRegion	Inclusion	kcl.gc	late	-1.58335	0.223452	0	3ssExonicRegion	Inclusion	shuffle.gc	late
TGACCA	3.17282	1.6488	4.58879	3ssExonicRegion	Inclusion	kcl.gc	late	-0.94765	0	0.565848	3ssExonicRegion	Inclusion	shuffle.gc	late
GACCAG	3.11787	1.71525	3.95418	3ssExonicRegion	Inclusion	kcl.gc	late	-0.711702	0	0.75744	3ssExonicRegion	Inclusion	shuffle.gc	late
AAGTTC	3.04822	1.3391	6.79817	3ssExonicRegion	Inclusion	kcl.gc	late	-0.570111	0	0.910714	3ssExonicRegion	Inclusion	shuffle.gc	late
GTTGCA	3.04822	1.3391	6.79817	3ssExonicRegion	Inclusion	kcl.gc	late	-0.195065	0.260674	1.52381	3ssExonicRegion	Inclusion	shuffle.gc	late
CGGTGA	3.04822	1.3391	6.79817	3ssExonicRegion	Inclusion	kcl.gc	late	-1.41728	0	0	3ssExonicRegion	Inclusion	shuffle.gc	late
CACATC	3.04822	1.3391	6.79817	3ssExonicRegion	Inclusion	kcl.gc	late	-1.58335	0.223452	0	3ssExonicRegion	Inclusion	shuffle.gc	late
GTAGCT	3.04822	1.3391	6.79817	3ssExonicRegion	Inclusion	kcl.gc	late	-1.04964	0	0.501984	3ssExonicRegion	Inclusion	shuffle.gc	late
GTGCTA	3.04822	1.3391	6.79817	3ssExonicRegion	Inclusion	kcl.gc	late	-0.94765	0	0.565848	3ssExonicRegion	Inclusion	shuffle.gc	late
TCACTA	3.04822	1.3391	6.79817	3ssExonicRegion	Inclusion	kcl.gc	late	-0.195065	0.260674	1.52381	3ssExonicRegion	Inclusion	shuffle.gc	late
AGCTCG	3.04822	1.3391	6.79817	3ssExonicRegion	Inclusion	kcl.gc	late	-0.195065	0.260674	1.52381	3ssExonicRegion	Inclusion	shuffle.gc	late
GACGTC	3.04822	1.3391	6.79817	3ssExonicRegion	Inclusion	kcl.gc	late	-1.41728	0	0	3ssExonicRegion	Inclusion	shuffle.gc	late
TGTTTC	3.04822	1.3391	6.79817	3ssExonicRegion	Inclusion	kcl.gc	late	0.384709	0.21095	1.83784	3ssExonicRegion	Inclusion	shuffle.gc	late
ACAATA	3.04822	1.3391	6.79817	3ssExonicRegion	Inclusion	kcl.gc	late	-1.47066	0	0	3ssExonicRegion	Inclusion	shuffle.gc	late
ACGCTG	3.04822	1.3391	6.79817	3ssExonicRegion	Inclusion	kcl.gc	late	-1.58335	0.223452	0	3ssExonicRegion	Inclusion	shuffle.gc	late
ATGCAA	3.04822	1.3391	6.79817	3ssExonicRegion	Inclusion	kcl.gc	late	-1.47066	0	0	3ssExonicRegion	Inclusion	shuffle.gc	late
GGTAGA	3.04822	1.3391	6.79817	3ssExonicRegion	Inclusion	kcl.gc	late	0.0923357	0.347673	2.29018	3ssExonicRegion	Inclusion	shuffle.gc	late
CTCTAC	3.04822	1.3391	6.79817	3ssExonicRegion	Inclusion	kcl.gc	late	-1.64299	0.441574	0	3ssExonicRegion	Inclusion	shuffle.gc	late
CTAGTC	3.04822	1.3391	6.79817	3ssExonicRegion	Inclusion	kcl.gc	late	-1.52493	0.228147	0	3ssExonicRegion	Inclusion	shuffle.gc	late
CTACCT	3.04822	1.3391	6.79817	3ssExonicRegion	Inclusion	kcl.gc	late	-1.70255	0.441265	0	3ssExonicRegion	Inclusion	shuffle.gc	late
ATACAA	3.04822	1.3391	6.79817	3ssExonicRegion	Inclusion	kcl.gc	late	-1.47066	0	0	3ssExonicRegion	Inclusion	shuffle.gc	late
TCAGAG	2.82347	1.63634	3.24	3ssExonicRegion	Inclusion	kcl.gc	late	0.666465	0.419223	1.54321	3ssExonicRegion	Inclusion	shuffle.gc	late
GGAGAG	2.82347	1.63634	3.24	3ssExonicRegion	Inclusion	kcl.gc	late	-1.39322	0.315826	0.34478	3ssExonicRegion	Inclusion	shuffle.gc	late
AAAAGG	2.82347	1.63634	3.24	3ssExonicRegion	Inclusion	kcl.gc	late	0.699445	0.487171	1.6814	3ssExonicRegion	Inclusion	shuffle.gc	late
AGAAAC	2.74853	1.54179	3.45283	3ssExonicRegion	Inclusion	kcl.gc	late	0.562141	0.370251	1.72841	3ssExonicRegion	Inclusion	shuffle.gc	late
TGAATC	2.73257	1.3785	4.55556	3ssExonicRegion	Inclusion	kcl.gc	late	-0.192755	0.156357	1.14189	3ssExonicRegion	Inclusion	shuffle.gc	late
CATCTT	2.73257	1.3785	4.55556	3ssExonicRegion	Inclusion	kcl.gc	late	-0.570111	0	0.910714	3ssExonicRegion	Inclusion	shuffle.gc	late
CCAAAA	2.73257	1.3785	4.55556	3ssExonicRegion	Inclusion	kcl.gc	late	-0.192755	0.156357	1.14189	3ssExonicRegion	Inclusion	shuffle.gc	late
GTAGCA	2.73257	1.3785	4.55556	3ssExonicRegion	Inclusion	kcl.gc	late	0.599009	0.484483	4.58929	3ssExonicRegion	Inclusion	shuffle.gc	late
TAATTT	2.73257	1.3785	4.55556	3ssExonicRegion	Inclusion	kcl.gc	late	-0.195065	0.260674	1.52381	3ssExonicRegion	Inclusion	shuffle.gc	late
GTTTAT	2.73257	1.3785	4.55556	3ssExonicRegion	Inclusion	kcl.gc	late	0.159943	0.194099	1.52853	3ssExonicRegion	Inclusion	shuffle.gc	late
GACTGT	2.73257	1.61378	6.08642	3ssExonicRegion	Inclusion	kcl.gc	late	-0.192755	0.175365	1.30759	3ssExonicRegion	Inclusion	shuffle.gc	late
TTTATG	2.73257	1.3785	4.55556	3ssExonicRegion	Inclusion	kcl.gc	late	-0.403163	0	1.14062	3ssExonicRegion	Inclusion	shuffle.gc	late
GACAAT	2.73257	1.3785	4.55556	3ssExonicRegion	Inclusion	kcl.gc	late	-1.52493	0.228147	0	3ssExonicRegion	Inclusion	shuffle.gc	late
ATCCCA	2.70241	1.45355	3.8162	3ssExonicRegion	Inclusion	kcl.gc	late	0.159943	0.194099	1.52853	3ssExonicRegion	Inclusion	shuffle.gc	late
CCCTGG	2.44091	1.35588	2.64835	3ssExonicRegion	Inclusion	kcl.gc	late	0.652151	0.370387	1.46385	3ssExonicRegion	Inclusion	shuffle.gc	late
CAAGGC	2.43297	1.54179	3.45283	3ssExonicRegion	Inclusion	kcl.gc	late	-0.835991	0	0.647959	3ssExonicRegion	Inclusion	shuffle.gc	late
ACCTCT	2.43297	1.38925	3.06289	3ssExonicRegion	Inclusion	kcl.gc	late	-1.232	0.152783	0.409091	3ssExonicRegion	Inclusion	shuffle.gc	late
GAAGCA	2.43297	1.38925	3.06289	3ssExonicRegion	Inclusion	kcl.gc	late	-0.208724	0	1.05315	3ssExonicRegion	Inclusion	shuffle.gc	late
ACCAAA	2.32237	1.45355	3.8162	3ssExonicRegion	Inclusion	kcl.gc	late	-0.192755	0.175365	1.30759	3ssExonicRegion	Inclusion	shuffle.gc	late
GGAGCT	2.15786	1.38925	3.06289	3ssExonicRegion	Inclusion	kcl.gc	late	1.55695	0.787512	2.33796	3ssExonicRegion	Inclusion	shuffle.gc	late
ATCTGA	5.93172	3.76366	3.96739	3ssIntronicRegion	Inclusion	kcl.gc	early	0.501429	0.391872	1.34872	3ssIntronicRegion	Inclusion	shuffle.gc	early
GAAACT	5.02018	2.82402	3.2289	3ssIntronicRegion	Inclusion	kcl.gc	early	0.990283	0.513932	1.63534	3ssIntronicRegion	Inclusion	shuffle.gc	early
ATTGTT	4.97973	2.3649	2.64706	3ssIntronicRegion	Inclusion	kcl.gc	early	1.17846	0.845406	1.73355	3ssIntronicRegion	Inclusion	shuffle.gc	early
ATAATT	4.88698	2.5192	2.97059	3ssIntronicRegion	Inclusion	kcl.gc	early	0.74457	0.17243	1.18368	3ssIntronicRegion	Inclusion	shuffle.gc	early
ATGTGT	4.87385	3.23393	2.66262	3ssIntronicRegion	Inclusion	kcl.gc	early	0.752873	0.594366	1.40346	3ssIntronicRegion	Inclusion	shuffle.gc	early
GTGTGT	4.85787	1.32361	1.7469	3ssIntronicRegion	Inclusion	kcl.gc	early	0.392998	0.116925	0.871392	3ssIntronicRegion	Inclusion	shuffle.gc	early
TACATT	4.44679	2.52062	2.78707	3ssIntronicRegion	Inclusion	kcl.gc	early	0.874132	0.174884	1.21289	3ssIntronicRegion	Inclusion	shuffle.gc	early
TTATCG	4.43501	2.1057	8.93333	3ssIntronicRegion	Inclusion	kcl.gc	early	-1.41565	0	0	3ssIntronicRegion	Inclusion	shuffle.gc	early
AGTTTA	4.2247	2.73339	3.22001	3ssIntronicRegion	Inclusion	kcl.gc	early	0.164246	0	1.03899	3ssIntronicRegion	Inclusion	shuffle.gc	early
AATAGG	4.03065	2.79561	4.5	3ssIntronicRegion	Inclusion	kcl.gc	early	0.935942	0.552786	1.91738	3ssIntronicRegion	Inclusion	shuffle.gc	early
ATATAG	4.01262	2.4245	3.23345	3ssIntronicRegion	Inclusion	kcl.gc	early	-1.89947	0.82591	0.320965	3ssIntronicRegion	Inclusion	shuffle.gc	early
ATTTAA	3.96513	2.51113	2.47396	3ssIntronicRegion	Inclusion	kcl.gc	early	-0.023422	0.0651282	1.05301	3ssIntronicRegion	Inclusion	shuffle.gc	early
GCGTGC	3.95851	1.6752	4.20095	3ssIntronicRegion	Inclusion	kcl.gc	early	-0.677421	0	1.09608	3ssIntronicRegion	Inclusion	shuffle.gc	early
TTCAAT	3.94436	2.40753	3.10657	3ssIntronicRegion	Inclusion	kcl.gc	early	1.20574	0.786214	1.76703	3ssIntronicRegion	Inclusion	shuffle.gc	early
AACACT	3.93627	1.78691	2.41401	3ssIntronicRegion	Inclusion	kcl.gc	early	-1.96226	0.878924	0.398176	3ssIntronicRegion	Inclusion	shuffle.gc	early
AAATGA	3.93186	2.01951	2.38647	3ssIntronicRegion	Inclusion	kcl.gc	early	0.616065	0.251884	1.24339	3ssIntronicRegion	Inclusion	shuffle.gc	early
CGGCAC	3.91969	1.71349	9.94444	3ssIntronicRegion	Inclusion	kcl.gc	early	-1.55696	0.220027	0	3ssIntronicRegion	Inclusion	shuffle.gc	early
CGATTG	3.91969	1.71349	9.94444	3ssIntronicRegion	Inclusion	kcl.gc	early	0.0634646	0.362796	2.20155	3ssIntronicRegion	Inclusion	shuffle.gc	early
TTACGA	3.91969	1.71349	9.94444	3ssIntronicRegion	Inclusion	kcl.gc	early	-1.4457	0	0	3ssIntronicRegion	Inclusion	shuffle.gc	early
AAACTT	3.91169	2.51686	2.65608	3ssIntronicRegion	Inclusion	kcl.gc	early	1.24787	0.724982	1.72403	3ssIntronicRegion	Inclusion	shuffle.gc	early
AATTAC	3.89532	2.20176	3.04167	3ssIntronicRegion	Inclusion	kcl.gc	early	0.773055	0.550686	1.61778	3ssIntronicRegion	Inclusion	shuffle.gc	early
TAGCTA	3.89532	1.34317	2.27556	3ssIntronicRegion	Inclusion	kcl.gc	early	-1.14625	0.195476	0.695539	3ssIntronicRegion	Inclusion	shuffle.gc	early
AGCGTT	3.84598	2.59666	4.62281	3ssIntronicRegion	Inclusion	kcl.gc	early	1.6586	0.984216	3.3631	3ssIntronicRegion	Inclusion	shuffle.gc	early
TTAAGA	3.82227	1.55973	2.26126	3ssIntronicRegion	Inclusion	kcl.gc	early	-1.49226	0.303222	0.606999	3ssIntronicRegion	Inclusion	shuffle.gc	early
ATTAAC	3.81927	3.05362	4.12401	3ssIntronicRegion	Inclusion	kcl.gc	early	-1.07599	0.103548	0.667488	3ssIntronicRegion	Inclusion	shuffle.gc	early
TAATAG	3.80025	2.36484	3.68471	3ssIntronicRegion	Inclusion	kcl.gc	early	-0.855174	0	0.748626	3ssIntronicRegion	Inclusion	shuffle.gc	early
TTTTTA	3.73583	2.09172	1.93638	3ssIntronicRegion	Inclusion	kcl.gc	early	1.44334	0.631879	1.38536	3ssIntronicRegion	Inclusion	shuffle.gc	early
CGTCCA	3.68671	2.02388	5.62236	3ssIntronicRegion	Inclusion	kcl.gc	early	-0.744056	0	0.726098	3ssIntronicRegion	Inclusion	shuffle.gc	early
TGTTAT	3.6639	2.01951	2.38647	3ssIntronicRegion	Inclusion	kcl.gc	early	1.33807	0.956314	1.74333	3ssIntronicRegion	Inclusion	shuffle.gc	early
TACTAC	3.65527	1.74142	3.69231	3ssIntronicRegion	Inclusion	kcl.gc	early	0.254602	0.201313	1.65588	3ssIntronicRegion	Inclusion	shuffle.gc	early
CGAAAC	3.64345	1.85152	6.6875	3ssIntronicRegion	Inclusion	kcl.gc	early	0.35374	0.459699	3.30814	3ssIntronicRegion	Inclusion	shuffle.gc	early
GATGGC	3.63752	2.31763	2.71351	3ssIntronicRegion	Inclusion	kcl.gc	early	0.761277	0.412936	1.4533	3ssIntronicRegion	Inclusion	shuffle.gc	early
CCAAAT	3.6191	2.73339	3.22001	3ssIntronicRegion	Inclusion	kcl.gc	early	-0.420668	0	0.963056	3ssIntronicRegion	Inclusion	shuffle.gc	early
ACTCAT	3.61576	2.4475	3.50676	3ssIntronicRegion	Inclusion	kcl.gc	early	-1.54161	0.984203	0.296359	3ssIntronicRegion	Inclusion	shuffle.gc	early
ATGAAA	3.5005	3.0349	3.28758	3ssIntronicRegion	Inclusion	kcl.gc	early	1.24787	0.668865	1.55549	3ssIntronicRegion	Inclusion	shuffle.gc	early
GTTACT	3.48935	1.78908	2.55662	3ssIntronicRegion	Inclusion	kcl.gc	early	-0.591702	0	0.906165	3ssIntronicRegion	Inclusion	shuffle.gc	early
TTATGT	3.48011	1.88393	2.25144	3ssIntronicRegion	Inclusion	kcl.gc	early	2.13131	0.649108	1.57703	3ssIntronicRegion	Inclusion	shuffle.gc	early
GAAGAA	3.47822	2.21096	2.46308	3ssIntronicRegion	Inclusion	kcl.gc	early	2.24171	0.723207	1.58416	3ssIntronicRegion	Inclusion	shuffle.gc	early
AAGCAA	3.4166	2.45709	2.88	3ssIntronicRegion	Inclusion	kcl.gc	early	0.901555	0.292276	1.30905	3ssIntronicRegion	Inclusion	shuffle.gc	early
TCGGAG	3.40491	1.30782	13.122	3ssIntronicRegion	Inclusion	kcl.gc	early	-0.744056	0	0.726098	3ssIntronicRegion	Inclusion	shuffle.gc	early
TCGTAT	3.40491	1.30782	13.122	3ssIntronicRegion	Inclusion	kcl.gc	early	-1.4457	0	0	3ssIntronicRegion	Inclusion	shuffle.gc	early
TCGTCC	3.3857	2.08707	3.99242	3ssIntronicRegion	Inclusion	kcl.gc	early	0.368971	0.340205	1.53297	3ssIntronicRegion	Inclusion	shuffle.gc	early
ACATTG	3.36461	2.05065	2.73118	3ssIntronicRegion	Inclusion	kcl.gc	early	-0.120469	0.0893767	1.10082	3ssIntronicRegion	Inclusion	shuffle.gc	early
TTAAAA	3.36304	2.80028	2.33198	3ssIntronicRegion	Inclusion	kcl.gc	early	0.34754	0	0.948916	3ssIntronicRegion	Inclusion	shuffle.gc	early
CCTTCA	3.31969	1.31823	1.87843	3ssIntronicRegion	Inclusion	kcl.gc	early	0.31739	0.135786	1.10889	3ssIntronicRegion	Inclusion	shuffle.gc	early
TAAGCA	3.31121	1.69766	2.28415	3ssIntronicRegion	Inclusion	kcl.gc	early	0.974477	0.432967	1.42039	3ssIntronicRegion	Inclusion	shuffle.gc	early
CATGTT	3.30119	1.92228	2.30118	3ssIntronicRegion	Inclusion	kcl.gc	early	-0.253726	0	0.969526	3ssIntronicRegion	Inclusion	shuffle.gc	early
TCAATG	3.28384	2.16083	2.93103	3ssIntronicRegion	Inclusion	kcl.gc	early	1.01924	0.61685	1.5994	3ssIntronicRegion	Inclusion	shuffle.gc	early
CTTAAA	3.25889	1.69816	2.06425	3ssIntronicRegion	Inclusion	kcl.gc	early	-1.437	0.358422	0.655172	3ssIntronicRegion	Inclusion	shuffle.gc	early
TGTTAA	3.24183	2.02321	2.27888	3ssIntronicRegion	Inclusion	kcl.gc	early	-0.873913	0	0.873317	3ssIntronicRegion	Inclusion	shuffle.gc	early
AAATTA	3.22722	2.60162	2.78541	3ssIntronicRegion	Inclusion	kcl.gc	early	-0.0788093	0	0.855263	3ssIntronicRegion	Inclusion	shuffle.gc	early
GAATTA	3.20355	1.75568	2.77838	3ssIntronicRegion	Inclusion	kcl.gc	early	1.06611	0.608545	1.84848	3ssIntronicRegion	Inclusion	shuffle.gc	early
GATCAT	3.17066	1.59859	2.97159	3ssIntronicRegion	Inclusion	kcl.gc	early	0.531885	0.396821	1.45281	3ssIntronicRegion	Inclusion	shuffle.gc	early
ATCAAA	3.15658	1.8507	2.64998	3ssIntronicRegion	Inclusion	kcl.gc	early	1.08158	0.362407	1.43651	3ssIntronicRegion	Inclusion	shuffle.gc	early
GGTTTC	3.12876	2.25276	2.80751	3ssIntronicRegion	Inclusion	kcl.gc	early	0.620496	0.262686	1.2292	3ssIntronicRegion	Inclusion	shuffle.gc	early
TAGAGT	3.12876	1.91971	2.55556	3ssIntronicRegion	Inclusion	kcl.gc	early	-0.420668	0.0935905	0.761162	3ssIntronicRegion	Inclusion	shuffle.gc	early
ATGATA	3.12478	1.90603	2.96	3ssIntronicRegion	Inclusion	kcl.gc	early	-1.2368	0.250631	0.513882	3ssIntronicRegion	Inclusion	shuffle.gc	early
TTTTAT	3.1236	1.80572	1.94348	3ssIntronicRegion	Inclusion	kcl.gc	early	-0.202982	0.337171	1.25467	3ssIntronicRegion	Inclusion	shuffle.gc	early
TATAAT	3.10958	1.46777	2.22398	3ssIntronicRegion	Inclusion	kcl.gc	early	-0.304051	0.164876	0.739316	3ssIntronicRegion	Inclusion	shuffle.gc	early
CTATAA	3.06769	1.70757	2.66632	3ssIntronicRegion	Inclusion	kcl.gc	early	-1.17777	0.216848	0.601562	3ssIntronicRegion	Inclusion	shuffle.gc	early
AAAATC	3.01301	1.46777	2.22398	3ssIntronicRegion	Inclusion	kcl.gc	early	-0.120469	0	0.906165	3ssIntronicRegion	Inclusion	shuffle.gc	early
TGTGTT	3.00928	1.54687	1.81539	3ssIntronicRegion	Inclusion	kcl.gc	early	1.41277	0.260089	1.21395	3ssIntronicRegion	Inclusion	shuffle.gc	early
TTAAAT	3.0063	1.34197	1.86596	3ssIntronicRegion	Inclusion	kcl.gc	early	1.74017	0.949946	1.65039	3ssIntronicRegion	Inclusion	shuffle.gc	early
CATTTT	3.00116	1.80572	1.94348	3ssIntronicRegion	Inclusion	kcl.gc	early	-0.410852	0	0.926641	3ssIntronicRegion	Inclusion	shuffle.gc	early
AACTTT	2.99261	1.56353	2.02941	3ssIntronicRegion	Inclusion	kcl.gc	early	-1.5355	0.382192	0.59595	3ssIntronicRegion	Inclusion	shuffle.gc	early
TATTAG	2.97841	1.79463	2.89977	3ssIntronicRegion	Inclusion	kcl.gc	early	-0.562921	0	0.869076	3ssIntronicRegion	Inclusion	shuffle.gc	early
AACCGA	2.9725	1.45667	6.61728	3ssIntronicRegion	Inclusion	kcl.gc	early	-1.41565	0	0	3ssIntronicRegion	Inclusion	shuffle.gc	early
ACCGAA	2.9725	1.45667	6.61728	3ssIntronicRegion	Inclusion	kcl.gc	early	-1.45779	0	0	3ssIntronicRegion	Inclusion	shuffle.gc	early
AAAGCA	2.94986	1.5965	2.19556	3ssIntronicRegion	Inclusion	kcl.gc	early	1.83837	0.254845	1.2693	3ssIntronicRegion	Inclusion	shuffle.gc	early
ATAATA	2.93781	1.65287	2.56256	3ssIntronicRegion	Inclusion	kcl.gc	early	0.164246	0.0909652	1.13439	3ssIntronicRegion	Inclusion	shuffle.gc	early
CGTGCA	2.91365	1.6752	4.20095	3ssIntronicRegion	Inclusion	kcl.gc	early	-1.11821	0.15111	0.462625	3ssIntronicRegion	Inclusion	shuffle.gc	early
TTTATG	2.89164	1.61964	2.11329	3ssIntronicRegion	Inclusion	kcl.gc	early	1.84267	1.18988	1.91636	3ssIntronicRegion	Inclusion	shuffle.gc	early
TACAAT	2.88967	1.3565	2.59649	3ssIntronicRegion	Inclusion	kcl.gc	early	-0.670803	0	0.78	3ssIntronicRegion	Inclusion	shuffle.gc	early
TAGATG	2.83928	1.45714	2.4672	3ssIntronicRegion	Inclusion	kcl.gc	early	0.282779	0.210995	1.29032	3ssIntronicRegion	Inclusion	shuffle.gc	early
TGTTAC	2.80352	1.91971	2.55556	3ssIntronicRegion	Inclusion	kcl.gc	early	0.370545	0.286525	1.27547	3ssIntronicRegion	Inclusion	shuffle.gc	early
ATGTTC	2.80352	1.45103	2.3105	3ssIntronicRegion	Inclusion	kcl.gc	early	-0.951745	0.195476	0.695539	3ssIntronicRegion	Inclusion	shuffle.gc	early
AGAGCA	2.78727	2.13985	2.42786	3ssIntronicRegion	Inclusion	kcl.gc	early	-0.230841	0.139255	0.799679	3ssIntronicRegion	Inclusion	shuffle.gc	early
GTGCAG	2.78727	1.45265	2.03595	3ssIntronicRegion	Inclusion	kcl.gc	early	-0.0804943	0.243932	1.19434	3ssIntronicRegion	Inclusion	shuffle.gc	early
TATGTG	2.77128	1.59375	2.07059	3ssIntronicRegion	Inclusion	kcl.gc	early	0.507347	0.23865	1.23268	3ssIntronicRegion	Inclusion	shuffle.gc	early
ACTTAT	2.73907	1.59302	2.82	3ssIntronicRegion	Inclusion	kcl.gc	early	-2.12877	1.14121	0.178073	3ssIntronicRegion	Inclusion	shuffle.gc	early
TTAAGC	2.73907	1.3565	2.59649	3ssIntronicRegion	Inclusion	kcl.gc	early	-0.437024	0	0.934596	3ssIntronicRegion	Inclusion	shuffle.gc	early
GTAATT	2.70673	1.45714	2.4672	3ssIntronicRegion	Inclusion	kcl.gc	early	-0.536107	0	0.933798	3ssIntronicRegion	Inclusion	shuffle.gc	early
AAGAAA	2.66017	1.64085	1.93333	3ssIntronicRegion	Inclusion	kcl.gc	early	1.11975	0.227321	1.22424	3ssIntronicRegion	Inclusion	shuffle.gc	early
CATCGC	2.65255	1.4675	4.44167	3ssIntronicRegion	Inclusion	kcl.gc	early	-0.908418	0	0.591966	3ssIntronicRegion	Inclusion	shuffle.gc	early
CGCCGA	2.65255	1.4675	4.44167	3ssIntronicRegion	Inclusion	kcl.gc	early	-1.55696	0.217707	0	3ssIntronicRegion	Inclusion	shuffle.gc	early
GCCGAC	2.65255	1.4675	4.44167	3ssIntronicRegion	Inclusion	kcl.gc	early	0.109926	0.189692	1.46928	3ssIntronicRegion	Inclusion	shuffle.gc	early
AATGTG	2.65162	2.20693	2.64051	3ssIntronicRegion	Inclusion	kcl.gc	early	-1.68605	0.667741	0.481001	3ssIntronicRegion	Inclusion	shuffle.gc	early
GAAAAT	2.65162	2.07387	2.44565	3ssIntronicRegion	Inclusion	kcl.gc	early	0.55947	0.351352	1.33106	3ssIntronicRegion	Inclusion	shuffle.gc	early
CTTTTT	2.64252	1.97685	1.93609	3ssIntronicRegion	Inclusion	kcl.gc	early	0.46224	0.106071	1.10121	3ssIntronicRegion	Inclusion	shuffle.gc	early
TTATCC	2.63791	1.70196	2.88089	3ssIntronicRegion	Inclusion	kcl.gc	early	0.434595	0.339548	1.3358	3ssIntronicRegion	Inclusion	shuffle.gc	early
AGAAAT	2.63154	1.39834	1.9525	3ssIntronicRegion	Inclusion	kcl.gc	early	1.11086	0.701309	1.52451	3ssIntronicRegion	Inclusion	shuffle.gc	early
TTCTTA	2.63037	1.96548	2.26176	3ssIntronicRegion	Inclusion	kcl.gc	early	0.455433	0.147167	1.10606	3ssIntronicRegion	Inclusion	shuffle.gc	early
GAAATA	2.62666	1.69766	2.28415	3ssIntronicRegion	Inclusion	kcl.gc	early	-1.53223	0.54119	0.537298	3ssIntronicRegion	Inclusion	shuffle.gc	early
ACGATG	2.61543	1.53123	3.72714	3ssIntronicRegion	Inclusion	kcl.gc	early	-1.4791	0	0	3ssIntronicRegion	Inclusion	shuffle.gc	early
TTCACG	2.61543	1.53123	3.72714	3ssIntronicRegion	Inclusion	kcl.gc	early	-1.05216	0	0.499106	3ssIntronicRegion	Inclusion	shuffle.gc	early
ATATTA	2.59655	2.01048	3.114	3ssIntronicRegion	Inclusion	kcl.gc	early	1.48696	0.396821	1.45281	3ssIntronicRegion	Inclusion	shuffle.gc	early
GGTGTA	2.58016	1.40117	2.36769	3ssIntronicRegion	Inclusion	kcl.gc	early	-0.562921	0	0.869076	3ssIntronicRegion	Inclusion	shuffle.gc	early
GCACTT	2.58016	1.34317	2.27556	3ssIntronicRegion	Inclusion	kcl.gc	early	1.01924	0.330978	1.42652	3ssIntronicRegion	Inclusion	shuffle.gc	early
AGTGCA	2.57934	1.59391	2.46622	3ssIntronicRegion	Inclusion	kcl.gc	early	-0.479124	0.0936466	0.785688	3ssIntronicRegion	Inclusion	shuffle.gc	early
TTTTAC	2.55606	1.88393	2.25144	3ssIntronicRegion	Inclusion	kcl.gc	early	0.770839	0.701309	1.52451	3ssIntronicRegion	Inclusion	shuffle.gc	early
GCAATA	2.53735	1.70665	3.17576	3ssIntronicRegion	Inclusion	kcl.gc	early	-0.750346	0	0.722876	3ssIntronicRegion	Inclusion	shuffle.gc	early
GCAAAC	2.53735	1.59859	2.97159	3ssIntronicRegion	Inclusion	kcl.gc	early	-0.670803	0	0.78	3ssIntronicRegion	Inclusion	shuffle.gc	early
GTTTCA	2.53713	1.44814	2.16667	3ssIntronicRegion	Inclusion	kcl.gc	early	1.04424	0.649108	1.57703	3ssIntronicRegion	Inclusion	shuffle.gc	early
TAGAAA	2.5219	1.79065	2.18843	3ssIntronicRegion	Inclusion	kcl.gc	early	-0.677595	0	0.895679	3ssIntronicRegion	Inclusion	shuffle.gc	early
TTTACA	2.5219	1.56353	2.02941	3ssIntronicRegion	Inclusion	kcl.gc	early	0.223022	0	0.98973	3ssIntronicRegion	Inclusion	shuffle.gc	early
GTTTTA	2.47215	1.84319	2.16947	3ssIntronicRegion	Inclusion	kcl.gc	early	-1.16204	0.228802	0.736746	3ssIntronicRegion	Inclusion	shuffle.gc	early
ACTATA	2.4613	1.50928	2.575	3ssIntronicRegion	Inclusion	kcl.gc	early	-0.734336	0	0.748626	3ssIntronicRegion	Inclusion	shuffle.gc	early
GTTTAT	2.45207	1.61964	2.11329	3ssIntronicRegion	Inclusion	kcl.gc	early	0.3428	0.0733838	1.1047	3ssIntronicRegion	Inclusion	shuffle.gc	early
AGAAAC	2.44993	1.93279	2.42927	3ssIntronicRegion	Inclusion	kcl.gc	early	0.126653	0.17243	1.18368	3ssIntronicRegion	Inclusion	shuffle.gc	early
AGCACT	2.44993	1.42276	2.11202	3ssIntronicRegion	Inclusion	kcl.gc	early	1.05173	0.240768	1.25602	3ssIntronicRegion	Inclusion	shuffle.gc	early
AATTAT	2.4425	1.74176	2.22373	3ssIntronicRegion	Inclusion	kcl.gc	early	1.77364	0.897573	1.77156	3ssIntronicRegion	Inclusion	shuffle.gc	early
TCTTAA	2.42807	1.31823	1.87843	3ssIntronicRegion	Inclusion	kcl.gc	early	0.511541	0.320378	1.24554	3ssIntronicRegion	Inclusion	shuffle.gc	early
TTAGTT	2.41761	1.69766	2.28415	3ssIntronicRegion	Inclusion	kcl.gc	early	-0.80165	0.178553	0.748724	3ssIntronicRegion	Inclusion	shuffle.gc	early
AAAAAT	2.39384	1.74576	2.02466	3ssIntronicRegion	Inclusion	kcl.gc	early	-0.719361	0.133926	0.845865	3ssIntronicRegion	Inclusion	shuffle.gc	early
CATTAT	2.38805	1.63559	2.4	3ssIntronicRegion	Inclusion	kcl.gc	early	-0.0201867	0	0.909561	3ssIntronicRegion	Inclusion	shuffle.gc	early
TATAAA	2.36495	1.42276	2.11202	3ssIntronicRegion	Inclusion	kcl.gc	early	0.0949564	0.166011	1.12901	3ssIntronicRegion	Inclusion	shuffle.gc	early
CGGAGT	2.35638	1.4029	3.3481	3ssIntronicRegion	Inclusion	kcl.gc	early	0.636502	0.383851	1.81818	3ssIntronicRegion	Inclusion	shuffle.gc	early
GACATT	2.34298	1.34317	2.27556	3ssIntronicRegion	Inclusion	kcl.gc	early	-0.750897	0	0.855263	3ssIntronicRegion	Inclusion	shuffle.gc	early
GATGAT	2.34298	1.59391	2.46622	3ssIntronicRegion	Inclusion	kcl.gc	early	-0.370985	0	0.934596	3ssIntronicRegion	Inclusion	shuffle.gc	early
TAAACC	2.34298	1.53257	2.37651	3ssIntronicRegion	Inclusion	kcl.gc	early	-0.479124	0	0.906165	3ssIntronicRegion	Inclusion	shuffle.gc	early
ACAATT	2.33686	1.70196	2.88089	3ssIntronicRegion	Inclusion	kcl.gc	early	-0.536563	0	0.891234	3ssIntronicRegion	Inclusion	shuffle.gc	early
GTAATG	2.33262	1.45714	2.4672	3ssIntronicRegion	Inclusion	kcl.gc	early	-0.912793	0.103548	0.667488	3ssIntronicRegion	Inclusion	shuffle.gc	early
TCAAAA	2.32774	1.51498	2.19737	3ssIntronicRegion	Inclusion	kcl.gc	early	0.0398124	0.181228	1.16156	3ssIntronicRegion	Inclusion	shuffle.gc	early
AGGTTT	2.32439	1.32584	2.04583	3ssIntronicRegion	Inclusion	kcl.gc	early	-0.830459	0.258706	0.723969	3ssIntronicRegion	Inclusion	shuffle.gc	early
CGTATT	2.30658	1.31744	3.8	3ssIntronicRegion	Inclusion	kcl.gc	early	-1.68088	0.425572	0	3ssIntronicRegion	Inclusion	shuffle.gc	early
CAATAC	2.30658	1.31744	3.8	3ssIntronicRegion	Inclusion	kcl.gc	early	1.16038	0.774972	2.51339	3ssIntronicRegion	Inclusion	shuffle.gc	early
ACCAAA	2.29238	1.66378	2.47549	3ssIntronicRegion	Inclusion	kcl.gc	early	-1.53223	0.420106	0.577218	3ssIntronicRegion	Inclusion	shuffle.gc	early
AGTGAT	2.29238	1.51498	2.19737	3ssIntronicRegion	Inclusion	kcl.gc	early	0.938594	0.458579	1.55081	3ssIntronicRegion	Inclusion	shuffle.gc	early
TTGTTA	2.24031	1.46777	2.22398	3ssIntronicRegion	Inclusion	kcl.gc	early	0.501429	0.159719	1.15163	3ssIntronicRegion	Inclusion	shuffle.gc	early
TGATGA	2.24031	1.44814	2.16667	3ssIntronicRegion	Inclusion	kcl.gc	early	1.22588	0.412936	1.4533	3ssIntronicRegion	Inclusion	shuffle.gc	early
ATCATT	2.23153	1.53257	2.37651	3ssIntronicRegion	Inclusion	kcl.gc	early	-1.0511	0.193756	0.657399	3ssIntronicRegion	Inclusion	shuffle.gc	early
ATAAAC	2.23153	1.53257	2.37651	3ssIntronicRegion	Inclusion	kcl.gc	early	-1.14625	0.304424	0.62298	3ssIntronicRegion	Inclusion	shuffle.gc	early
TCATGA	2.23153	1.53257	2.37651	3ssIntronicRegion	Inclusion	kcl.gc	early	-1.00198	0.195476	0.695539	3ssIntronicRegion	Inclusion	shuffle.gc	early
ATGACA	2.23153	1.59391	2.46622	3ssIntronicRegion	Inclusion	kcl.gc	early	1.89805	0.803106	1.8224	3ssIntronicRegion	Inclusion	shuffle.gc	early
TCTGAG	2.22048	1.45265	2.03595	3ssIntronicRegion	Inclusion	kcl.gc	early	0.998448	0.396239	1.28804	3ssIntronicRegion	Inclusion	shuffle.gc	early
ATCCAT	2.2099	1.45714	2.4672	3ssIntronicRegion	Inclusion	kcl.gc	early	-0.420668	0	0.933798	3ssIntronicRegion	Inclusion	shuffle.gc	early
CTTTAT	2.17355	1.90728	2.17727	3ssIntronicRegion	Inclusion	kcl.gc	early	-0.663218	0.146938	0.802215	3ssIntronicRegion	Inclusion	shuffle.gc	early
CACTGT	2.17355	1.61101	1.98881	3ssIntronicRegion	Inclusion	kcl.gc	early	-1.74126	0.512398	0.630668	3ssIntronicRegion	Inclusion	shuffle.gc	early
TTACAT	2.15519	1.69766	2.28415	3ssIntronicRegion	Inclusion	kcl.gc	early	1.40659	0.809513	1.65189	3ssIntronicRegion	Inclusion	shuffle.gc	early
AGTTGG	2.15519	1.46777	2.22398	3ssIntronicRegion	Inclusion	kcl.gc	early	-0.0428356	0.166011	1.12901	3ssIntronicRegion	Inclusion	shuffle.gc	early
AGCAAG	2.1095	1.60041	2.3287	3ssIntronicRegion	Inclusion	kcl.gc	early	-0.0788093	0	0.932981	3ssIntronicRegion	Inclusion	shuffle.gc	early
ACCATC	2.09262	1.34317	2.27556	3ssIntronicRegion	Inclusion	kcl.gc	early	-1.14625	0.303222	0.606999	3ssIntronicRegion	Inclusion	shuffle.gc	early
GATTGT	2.09262	1.34317	2.27556	3ssIntronicRegion	Inclusion	kcl.gc	early	0.140439	0.195796	1.16993	3ssIntronicRegion	Inclusion	shuffle.gc	early
CTGTTA	2.04506	1.32584	2.04583	3ssIntronicRegion	Inclusion	kcl.gc	early	-1.1609	0.336211	0.705556	3ssIntronicRegion	Inclusion	shuffle.gc	early
AACCTT	2.02196	1.51498	2.19737	3ssIntronicRegion	Inclusion	kcl.gc	early	0.185581	0.0799748	1.04801	3ssIntronicRegion	Inclusion	shuffle.gc	early
TGCAAT	1.9803	1.34317	2.27556	3ssIntronicRegion	Inclusion	kcl.gc	early	0.514514	0.102037	1.18249	3ssIntronicRegion	Inclusion	shuffle.gc	early
GGATCT	1.97156	1.37848	2.16986	3ssIntronicRegion	Inclusion	kcl.gc	early	0.579841	0.474196	1.47383	3ssIntronicRegion	Inclusion	shuffle.gc	early
TGTAAT	1.97156	1.37848	2.16986	3ssIntronicRegion	Inclusion	kcl.gc	early	0.0398124	0.0839939	1.1311	3ssIntronicRegion	Inclusion	shuffle.gc	early
CCCCCG	1.90404	1.49826	3.11243	3ssIntronicRegion	Inclusion	kcl.gc	early	-0.734336	0	0.850932	3ssIntronicRegion	Inclusion	shuffle.gc	early
AGACAT	1.79391	1.41722	2.23811	3ssIntronicRegion	Inclusion	kcl.gc	early	0.761277	0.563832	1.53173	3ssIntronicRegion	Inclusion	shuffle.gc	early
TGAAAT	1.75009	1.45265	2.03595	3ssIntronicRegion	Inclusion	kcl.gc	early	-0.221763	0.0733838	1.1047	3ssIntronicRegion	Inclusion	shuffle.gc	early
TTTATA	1.64222	1.83157	2.0307	3ssIntronicRegion	Inclusion	kcl.gc	early	-0.178004	0	0.928571	3ssIntronicRegion	Inclusion	shuffle.gc	early
AAAAAA	6.78985	2.07963	2.10048	3ssIntronicRegion	Inclusion	kcl.gc	late	1.30704	1.23761	1.72798	3ssIntronicRegion	Inclusion	shuffle.gc	late
GCTATT	5.21259	3.13434	3.23482	3ssIntronicRegion	Inclusion	kcl.gc	late	-1.981	0.817661	0.43578	3ssIntronicRegion	Inclusion	shuffle.gc	late
ATTAAG	5.17648	2.8124	3.48709	3ssIntronicRegion	Inclusion	kcl.gc	late	0.306253	0.216786	1.31909	3ssIntronicRegion	Inclusion	shuffle.gc	late
CTATAA	4.61867	2.664	3.04124	3ssIntronicRegion	Inclusion	kcl.gc	late	-0.768593	0	0.90566	3ssIntronicRegion	Inclusion	shuffle.gc	late
ATCACG	4.53618	1.91555	9.14815	3ssIntronicRegion	Inclusion	kcl.gc	late	-0.835896	0	0.647959	3ssIntronicRegion	Inclusion	shuffle.gc	late
TAGCCG	4.53618	1.91555	9.14815	3ssIntronicRegion	Inclusion	kcl.gc	late	-0.403137	0	1.14062	3ssIntronicRegion	Inclusion	shuffle.gc	late
TAACCA	4.52283	2.20439	2.8292	3ssIntronicRegion	Inclusion	kcl.gc	late	1.21135	0.851892	1.74346	3ssIntronicRegion	Inclusion	shuffle.gc	late
TTCTAT	4.45403	2.01899	2.2332	3ssIntronicRegion	Inclusion	kcl.gc	late	-1.31517	0.444234	0.642492	3ssIntronicRegion	Inclusion	shuffle.gc	late
ATTTAA	4.33113	3.42189	2.47536	3ssIntronicRegion	Inclusion	kcl.gc	late	-0.122943	0.0532206	0.924134	3ssIntronicRegion	Inclusion	shuffle.gc	late
AAATAT	4.31572	2.64469	2.37968	3ssIntronicRegion	Inclusion	kcl.gc	late	-0.273345	0.127997	1.11425	3ssIntronicRegion	Inclusion	shuffle.gc	late
ATAAAC	4.27709	2.53346	3.07792	3ssIntronicRegion	Inclusion	kcl.gc	late	0.647443	0.323199	1.35102	3ssIntronicRegion	Inclusion	shuffle.gc	late
TATTAA	4.26347	2.679	2.51111	3ssIntronicRegion	Inclusion	kcl.gc	late	-1.92642	0.778602	0.552316	3ssIntronicRegion	Inclusion	shuffle.gc	late
TGAAAT	4.26347	1.80306	2.09873	3ssIntronicRegion	Inclusion	kcl.gc	late	0.327848	0.283898	1.20602	3ssIntronicRegion	Inclusion	shuffle.gc	late
ATTCAA	4.22775	2.69154	3.4	3ssIntronicRegion	Inclusion	kcl.gc	late	-1.27479	0.699038	0.353153	3ssIntronicRegion	Inclusion	shuffle.gc	late
CTTGAT	4.19459	2.22177	2.59474	3ssIntronicRegion	Inclusion	kcl.gc	late	0.133928	0.0759571	1.0449	3ssIntronicRegion	Inclusion	shuffle.gc	late
TATCTC	4.18439	2.24242	3.18667	3ssIntronicRegion	Inclusion	kcl.gc	late	-0.174327	0.087726	1.05464	3ssIntronicRegion	Inclusion	shuffle.gc	late
GACATA	4.14966	2.31842	3.26733	3ssIntronicRegion	Inclusion	kcl.gc	late	-2.17933	1.16847	0.167926	3ssIntronicRegion	Inclusion	shuffle.gc	late
CCTATA	4.14966	2.31842	3.26733	3ssIntronicRegion	Inclusion	kcl.gc	late	-0.0857748	0.0906621	1.09907	3ssIntronicRegion	Inclusion	shuffle.gc	late
CATGGA	4.14809	2.664	3.04124	3ssIntronicRegion	Inclusion	kcl.gc	late	1.16837	0.729613	1.58667	3ssIntronicRegion	Inclusion	shuffle.gc	late
ACATAC	4.14809	1.45758	2.34653	3ssIntronicRegion	Inclusion	kcl.gc	late	-0.717748	0	0.9753	3ssIntronicRegion	Inclusion	shuffle.gc	late
AAATTG	4.12559	2.18323	2.51069	3ssIntronicRegion	Inclusion	kcl.gc	late	-1.10335	0.444234	0.642492	3ssIntronicRegion	Inclusion	shuffle.gc	late
ATATTT	4.11402	2.59118	2.14359	3ssIntronicRegion	Inclusion	kcl.gc	late	-0.201844	0.107389	1.08792	3ssIntronicRegion	Inclusion	shuffle.gc	late
GGATAT	4.084	1.70509	2.58545	3ssIntronicRegion	Inclusion	kcl.gc	late	-1.76062	0.544094	0.385429	3ssIntronicRegion	Inclusion	shuffle.gc	late
AAACTG	4.06929	2.72429	2.57519	3ssIntronicRegion	Inclusion	kcl.gc	late	-0.186747	0	0.949911	3ssIntronicRegion	Inclusion	shuffle.gc	late
CAAAGT	4.04791	2.21784	2.68614	3ssIntronicRegion	Inclusion	kcl.gc	late	0.839678	0.39516	1.35112	3ssIntronicRegion	Inclusion	shuffle.gc	late
ACTAAA	4.02392	1.49609	1.98588	3ssIntronicRegion	Inclusion	kcl.gc	late	-2.04595	0.887112	0.472021	3ssIntronicRegion	Inclusion	shuffle.gc	late
TTTCAT	3.94579	2.10657	2.0407	3ssIntronicRegion	Inclusion	kcl.gc	late	0.446842	0.35559	1.24788	3ssIntronicRegion	Inclusion	shuffle.gc	late
ACTAAT	3.88927	1.41545	2.11459	3ssIntronicRegion	Inclusion	kcl.gc	late	-0.498879	0	0.904762	3ssIntronicRegion	Inclusion	shuffle.gc	late
GTCATA	3.83161	2.38567	3.64253	3ssIntronicRegion	Inclusion	kcl.gc	late	1.81336	1.05101	2.03571	3ssIntronicRegion	Inclusion	shuffle.gc	late
AAGTAC	3.82839	2.20439	2.8292	3ssIntronicRegion	Inclusion	kcl.gc	late	1.63154	0.534018	1.72393	3ssIntronicRegion	Inclusion	shuffle.gc	late
CGAAGG	3.78461	1.8815	5.74766	3ssIntronicRegion	Inclusion	kcl.gc	late	-0.0289861	0.175365	1.30759	3ssIntronicRegion	Inclusion	shuffle.gc	late
AAGCAT	3.76984	2.38255	2.602	3ssIntronicRegion	Inclusion	kcl.gc	late	1.41808	0.418147	1.45027	3ssIntronicRegion	Inclusion	shuffle.gc	late
ATAATT	3.75897	2.52707	2.49451	3ssIntronicRegion	Inclusion	kcl.gc	late	-1.26353	0.342329	0.673298	3ssIntronicRegion	Inclusion	shuffle.gc	late
TCTACT	3.72717	2.76514	3.18019	3ssIntronicRegion	Inclusion	kcl.gc	late	0.747439	0.418147	1.45027	3ssIntronicRegion	Inclusion	shuffle.gc	late
CACTAA	3.72717	1.86059	2.58249	3ssIntronicRegion	Inclusion	kcl.gc	late	-0.717748	0.181465	0.698785	3ssIntronicRegion	Inclusion	shuffle.gc	late
TAAGAA	3.69522	1.99317	2.30795	3ssIntronicRegion	Inclusion	kcl.gc	late	2.52539	1.15181	1.85763	3ssIntronicRegion	Inclusion	shuffle.gc	late
AGAAAA	3.65016	1.55957	1.83994	3ssIntronicRegion	Inclusion	kcl.gc	late	0.820645	0.324896	1.22329	3ssIntronicRegion	Inclusion	shuffle.gc	late
ATTCTA	3.59104	1.41545	2.11459	3ssIntronicRegion	Inclusion	kcl.gc	late	-1.71042	0.505855	0.549769	3ssIntronicRegion	Inclusion	shuffle.gc	late
ATCTTA	3.54542	2.22177	2.59474	3ssIntronicRegion	Inclusion	kcl.gc	late	-0.235738	0	1.00047	3ssIntronicRegion	Inclusion	shuffle.gc	late
ATTAAA	3.52718	1.7003	1.95157	3ssIntronicRegion	Inclusion	kcl.gc	late	0.446842	0.057365	1.05965	3ssIntronicRegion	Inclusion	shuffle.gc	late
CCTGTT	3.5249	1.65463	2.01357	3ssIntronicRegion	Inclusion	kcl.gc	late	-0.257988	0.0582134	1.03324	3ssIntronicRegion	Inclusion	shuffle.gc	late
AATTGC	3.48096	2.16681	3.01263	3ssIntronicRegion	Inclusion	kcl.gc	late	-1.47016	0.474872	0.474351	3ssIntronicRegion	Inclusion	shuffle.gc	late
TATAAC	3.48096	1.94159	2.89219	3ssIntronicRegion	Inclusion	kcl.gc	late	-0.882717	0.0873999	0.805225	3ssIntronicRegion	Inclusion	shuffle.gc	late
AATCCA	3.47142	2.32641	2.80952	3ssIntronicRegion	Inclusion	kcl.gc	late	1.64014	0.700268	1.62705	3ssIntronicRegion	Inclusion	shuffle.gc	late
ACAATT	3.47142	2.4327	2.93789	3ssIntronicRegion	Inclusion	kcl.gc	late	0.332936	0.0906621	1.09907	3ssIntronicRegion	Inclusion	shuffle.gc	late
TCCTAT	3.45048	1.79221	2.31959	3ssIntronicRegion	Inclusion	kcl.gc	late	-1.33723	0.363557	0.631509	3ssIntronicRegion	Inclusion	shuffle.gc	late
TGAAAG	3.44864	2.01899	2.2332	3ssIntronicRegion	Inclusion	kcl.gc	late	-0.68675	0	0.903846	3ssIntronicRegion	Inclusion	shuffle.gc	late
AAGAAA	3.43253	2.69689	2.21766	3ssIntronicRegion	Inclusion	kcl.gc	late	0.284494	0.108001	1.10343	3ssIntronicRegion	Inclusion	shuffle.gc	late
TATAAA	3.42958	2.34848	2.23232	3ssIntronicRegion	Inclusion	kcl.gc	late	0.851761	0.384714	1.28015	3ssIntronicRegion	Inclusion	shuffle.gc	late
CATACG	3.42943	1.61378	6.08642	3ssIntronicRegion	Inclusion	kcl.gc	late	1.0375	0.654083	3.07508	3ssIntronicRegion	Inclusion	shuffle.gc	late
TCGCAT	3.42943	1.61378	6.08642	3ssIntronicRegion	Inclusion	kcl.gc	late	1.0375	0.654083	3.07508	3ssIntronicRegion	Inclusion	shuffle.gc	late
TCTTAA	3.42797	1.6111	1.92888	3ssIntronicRegion	Inclusion	kcl.gc	late	0.327848	0	1.02431	3ssIntronicRegion	Inclusion	shuffle.gc	late
AATTAA	3.42797	1.7163	2.02899	3ssIntronicRegion	Inclusion	kcl.gc	late	1.36762	0.568497	1.46405	3ssIntronicRegion	Inclusion	shuffle.gc	late
CAGAAT	3.38672	1.80848	2.21991	3ssIntronicRegion	Inclusion	kcl.gc	late	-0.0378718	0.0641737	1.08096	3ssIntronicRegion	Inclusion	shuffle.gc	late
TCAAAA	3.36652	1.89737	2.18298	3ssIntronicRegion	Inclusion	kcl.gc	late	-1.16578	0.26337	0.6844	3ssIntronicRegion	Inclusion	shuffle.gc	late
ATTTAC	3.3529	2.28232	2.58889	3ssIntronicRegion	Inclusion	kcl.gc	late	-0.497841	0.0802567	0.793293	3ssIntronicRegion	Inclusion	shuffle.gc	late
AACTGA	3.33667	1.74312	2.07678	3ssIntronicRegion	Inclusion	kcl.gc	late	0.461735	0.14059	1.15594	3ssIntronicRegion	Inclusion	shuffle.gc	late
AAATGA	3.33415	2.30866	2.28148	3ssIntronicRegion	Inclusion	kcl.gc	late	0.916661	0.305912	1.28659	3ssIntronicRegion	Inclusion	shuffle.gc	late
ATTTTT	3.29427	1.89128	1.77026	3ssIntronicRegion	Inclusion	kcl.gc	late	-0.527668	0	1.00057	3ssIntronicRegion	Inclusion	shuffle.gc	late
TAGTCA	3.25244	2.76514	3.18019	3ssIntronicRegion	Inclusion	kcl.gc	late	-0.703365	0	0.93424	3ssIntronicRegion	Inclusion	shuffle.gc	late
TTAGGC	3.24793	1.97834	3.24645	3ssIntronicRegion	Inclusion	kcl.gc	late	0.65195	0.370387	1.46385	3ssIntronicRegion	Inclusion	shuffle.gc	late
ATTGTT	3.24383	2.61468	2.54738	3ssIntronicRegion	Inclusion	kcl.gc	late	-0.885688	0.293459	0.736246	3ssIntronicRegion	Inclusion	shuffle.gc	late
TAATAA	3.23885	1.99317	2.30795	3ssIntronicRegion	Inclusion	kcl.gc	late	2.72938	0.895179	1.67946	3ssIntronicRegion	Inclusion	shuffle.gc	late
TATTAG	3.20633	1.65748	2.46783	3ssIntronicRegion	Inclusion	kcl.gc	late	1.17036	0.593732	1.62759	3ssIntronicRegion	Inclusion	shuffle.gc	late
GTAACT	3.20633	1.90596	2.70048	3ssIntronicRegion	Inclusion	kcl.gc	late	-0.0648208	0.0777948	1.07787	3ssIntronicRegion	Inclusion	shuffle.gc	late
ACTGAT	3.20633	1.39932	2.23978	3ssIntronicRegion	Inclusion	kcl.gc	late	0.180653	0	0.996757	3ssIntronicRegion	Inclusion	shuffle.gc	late
GGTTAA	3.1923	1.94159	2.89219	3ssIntronicRegion	Inclusion	kcl.gc	late	-0.115784	0	1.03104	3ssIntronicRegion	Inclusion	shuffle.gc	late
CCCCGG	3.18288	1.63634	3.24	3ssIntronicRegion	Inclusion	kcl.gc	late	1.59551	0.61604	1.86916	3ssIntronicRegion	Inclusion	shuffle.gc	late
CTCGAA	3.17255	1.6488	4.58879	3ssIntronicRegion	Inclusion	kcl.gc	late	-1.39292	0.317784	0.374256	3ssIntronicRegion	Inclusion	shuffle.gc	late
GTTTCG	3.17255	1.6488	4.58879	3ssIntronicRegion	Inclusion	kcl.gc	late	-0.800802	0	0.695773	3ssIntronicRegion	Inclusion	shuffle.gc	late
AAAAAG	3.16008	2.20439	2.20657	3ssIntronicRegion	Inclusion	kcl.gc	late	0.428296	0.0579878	0.916094	3ssIntronicRegion	Inclusion	shuffle.gc	late
AAATAA	3.14586	1.70516	1.90287	3ssIntronicRegion	Inclusion	kcl.gc	late	-0.587708	0.127997	1.11425	3ssIntronicRegion	Inclusion	shuffle.gc	late
TTCATA	3.14237	1.69764	2.12506	3ssIntronicRegion	Inclusion	kcl.gc	late	-0.0648208	0.0792437	1.11284	3ssIntronicRegion	Inclusion	shuffle.gc	late
CATTTA	3.13775	1.98246	2.17874	3ssIntronicRegion	Inclusion	kcl.gc	late	0.18929	0.0666591	1.07384	3ssIntronicRegion	Inclusion	shuffle.gc	late
TAACAG	3.10764	1.93846	2.48148	3ssIntronicRegion	Inclusion	kcl.gc	late	0.380737	0.170832	1.15	3ssIntronicRegion	Inclusion	shuffle.gc	late
TTAATC	3.05833	2.13093	2.43158	3ssIntronicRegion	Inclusion	kcl.gc	late	-1.83268	0.959869	0.424256	3ssIntronicRegion	Inclusion	shuffle.gc	late
CCCAGT	3.05833	1.48734	2.10127	3ssIntronicRegion	Inclusion	kcl.gc	late	1.09523	0.489118	1.43491	3ssIntronicRegion	Inclusion	shuffle.gc	late
CGGTTA	3.04812	1.3391	6.79817	3ssIntronicRegion	Inclusion	kcl.gc	late	-1.58319	0.223452	0	3ssIntronicRegion	Inclusion	shuffle.gc	late
AATCGA	3.04812	1.3391	6.79817	3ssIntronicRegion	Inclusion	kcl.gc	late	-0.711633	0	0.75744	3ssIntronicRegion	Inclusion	shuffle.gc	late
TATTTG	2.98978	2.17639	2.08812	3ssIntronicRegion	Inclusion	kcl.gc	late	-0.823523	0.340703	0.762667	3ssIntronicRegion	Inclusion	shuffle.gc	late
TTCAAA	2.95204	1.68142	1.98314	3ssIntronicRegion	Inclusion	kcl.gc	late	-1.56162	0.519797	0.62449	3ssIntronicRegion	Inclusion	shuffle.gc	late
TATCCT	2.94871	1.79221	2.31959	3ssIntronicRegion	Inclusion	kcl.gc	late	0.402516	0.37251	1.33148	3ssIntronicRegion	Inclusion	shuffle.gc	late
TAACTT	2.94252	1.59932	2.04755	3ssIntronicRegion	Inclusion	kcl.gc	late	-2.17891	1.02241	0.440287	3ssIntronicRegion	Inclusion	shuffle.gc	late
GAATTA	2.93636	1.51569	2.16963	3ssIntronicRegion	Inclusion	kcl.gc	late	0.0937193	0.0738505	1.08629	3ssIntronicRegion	Inclusion	shuffle.gc	late
AAGTCT	2.93636	1.6637	2.19524	3ssIntronicRegion	Inclusion	kcl.gc	late	1.63724	1.17322	1.96219	3ssIntronicRegion	Inclusion	shuffle.gc	late
TACTAA	2.93636	1.44991	2.03682	3ssIntronicRegion	Inclusion	kcl.gc	late	0.133928	0.161752	1.15144	3ssIntronicRegion	Inclusion	shuffle.gc	late
ATGTGC	2.9299	1.80848	2.21991	3ssIntronicRegion	Inclusion	kcl.gc	late	1.79076	1.15181	1.85763	3ssIntronicRegion	Inclusion	shuffle.gc	late
AGGAAT	2.9299	1.62718	2.12963	3ssIntronicRegion	Inclusion	kcl.gc	late	0.501469	0.352696	1.31624	3ssIntronicRegion	Inclusion	shuffle.gc	late
ATATAA	2.92812	2.13093	2.43158	3ssIntronicRegion	Inclusion	kcl.gc	late	2.72938	0.712366	1.54375	3ssIntronicRegion	Inclusion	shuffle.gc	late
TTCATT	2.92397	1.71547	1.84429	3ssIntronicRegion	Inclusion	kcl.gc	late	1.64701	0.845065	1.51184	3ssIntronicRegion	Inclusion	shuffle.gc	late
GAAAAA	2.90693	2.34848	2.23232	3ssIntronicRegion	Inclusion	kcl.gc	late	0.150087	0	0.949839	3ssIntronicRegion	Inclusion	shuffle.gc	late
AAAACT	2.83707	1.57905	1.9986	3ssIntronicRegion	Inclusion	kcl.gc	late	-0.00192206	0.219234	1.209	3ssIntronicRegion	Inclusion	shuffle.gc	late
TTAAGG	2.83503	2.14828	2.58468	3ssIntronicRegion	Inclusion	kcl.gc	late	-0.955634	0.158351	0.784198	3ssIntronicRegion	Inclusion	shuffle.gc	late
TTTACT	2.82554	2.25346	2.17004	3ssIntronicRegion	Inclusion	kcl.gc	late	-2.0558	0.775281	0.530619	3ssIntronicRegion	Inclusion	shuffle.gc	late
ATGAAG	2.81791	1.55196	2.0969	3ssIntronicRegion	Inclusion	kcl.gc	late	0.992694	0.431683	1.35778	3ssIntronicRegion	Inclusion	shuffle.gc	late
ATCCAT	2.81597	1.63197	2.60349	3ssIntronicRegion	Inclusion	kcl.gc	late	0.64702	0.498926	1.55346	3ssIntronicRegion	Inclusion	shuffle.gc	late
TTTAGC	2.76749	1.39932	2.23978	3ssIntronicRegion	Inclusion	kcl.gc	late	0.835941	0.37251	1.33148	3ssIntronicRegion	Inclusion	shuffle.gc	late
CAATTA	2.76749	1.65748	2.46783	3ssIntronicRegion	Inclusion	kcl.gc	late	2.12134	0.534018	1.72393	3ssIntronicRegion	Inclusion	shuffle.gc	late
AAAGTC	2.73611	1.31517	2.16923	3ssIntronicRegion	Inclusion	kcl.gc	late	-0.574204	0	0.87549	3ssIntronicRegion	Inclusion	shuffle.gc	late
ATTAGA	2.73611	1.80132	2.47394	3ssIntronicRegion	Inclusion	kcl.gc	late	-0.0648208	0.0777948	1.07787	3ssIntronicRegion	Inclusion	shuffle.gc	late
ACTGCA	2.73611	1.80132	2.47394	3ssIntronicRegion	Inclusion	kcl.gc	late	-1.2701	0.552683	0.503277	3ssIntronicRegion	Inclusion	shuffle.gc	late
ATTCGT	2.73238	1.3785	4.55556	3ssIntronicRegion	Inclusion	kcl.gc	late	0.159927	0.194099	1.52853	3ssIntronicRegion	Inclusion	shuffle.gc	late
ACGAAG	2.73238	1.3785	4.55556	3ssIntronicRegion	Inclusion	kcl.gc	late	1.73173	0.942406	3.48409	3ssIntronicRegion	Inclusion	shuffle.gc	late
TATCGT	2.73238	1.3785	4.55556	3ssIntronicRegion	Inclusion	kcl.gc	late	-0.195056	0.260674	1.52381	3ssIntronicRegion	Inclusion	shuffle.gc	late
TGTTTC	2.72858	1.40733	1.73333	3ssIntronicRegion	Inclusion	kcl.gc	late	-0.0769232	0.0469192	1.02222	3ssIntronicRegion	Inclusion	shuffle.gc	late
AAAATA	2.72858	1.79345	1.87059	3ssIntronicRegion	Inclusion	kcl.gc	late	-0.775985	0	1.02345	3ssIntronicRegion	Inclusion	shuffle.gc	late
AGCATG	2.72842	1.44079	1.96712	3ssIntronicRegion	Inclusion	kcl.gc	late	-0.0378718	0.138946	1.12993	3ssIntronicRegion	Inclusion	shuffle.gc	late
TCATAT	2.71682	1.46068	2.19481	3ssIntronicRegion	Inclusion	kcl.gc	late	-0.574204	0	0.87549	3ssIntronicRegion	Inclusion	shuffle.gc	late
AATTTG	2.70912	1.89737	2.18298	3ssIntronicRegion	Inclusion	kcl.gc	late	-0.68675	0.343079	0.689727	3ssIntronicRegion	Inclusion	shuffle.gc	late
CAAATT	2.70387	1.84318	2.28655	3ssIntronicRegion	Inclusion	kcl.gc	late	-0.832329	0.36583	0.648279	3ssIntronicRegion	Inclusion	shuffle.gc	late
CTAAAG	2.70387	1.6637	2.19524	3ssIntronicRegion	Inclusion	kcl.gc	late	-1.78137	0.684866	0.474089	3ssIntronicRegion	Inclusion	shuffle.gc	late
TAATTA	2.70387	1.51569	2.16963	3ssIntronicRegion	Inclusion	kcl.gc	late	-2.16717	0.952924	0.402816	3ssIntronicRegion	Inclusion	shuffle.gc	late
GCATGG	2.70258	1.48734	2.10127	3ssIntronicRegion	Inclusion	kcl.gc	late	0.272195	0.156145	1.18496	3ssIntronicRegion	Inclusion	shuffle.gc	late
TCGAAG	2.70214	1.45355	3.8162	3ssIntronicRegion	Inclusion	kcl.gc	late	1.73173	0.942406	3.48409	3ssIntronicRegion	Inclusion	shuffle.gc	late
CGCATT	2.70214	1.45355	3.8162	3ssIntronicRegion	Inclusion	kcl.gc	late	-0.835896	0	0.647959	3ssIntronicRegion	Inclusion	shuffle.gc	late
CATAAT	2.69625	1.41518	2.46202	3ssIntronicRegion	Inclusion	kcl.gc	late	-0.420783	0	1.03746	3ssIntronicRegion	Inclusion	shuffle.gc	late
ATACTA	2.69625	1.71867	2.7624	3ssIntronicRegion	Inclusion	kcl.gc	late	-1.27479	0.221413	0.583399	3ssIntronicRegion	Inclusion	shuffle.gc	late
TATTTT	2.69092	2.7806	2.05714	3ssIntronicRegion	Inclusion	kcl.gc	late	-0.767351	0.0915582	1.06585	3ssIntronicRegion	Inclusion	shuffle.gc	late
TATTTA	2.68688	2.66575	2.18252	3ssIntronicRegion	Inclusion	kcl.gc	late	-0.386711	0	0.952794	3ssIntronicRegion	Inclusion	shuffle.gc	late
GAAATG	2.63126	1.94972	2.24386	3ssIntronicRegion	Inclusion	kcl.gc	late	-0.515197	0	0.940067	3ssIntronicRegion	Inclusion	shuffle.gc	late
CTGAAA	2.63126	2.01899	2.2332	3ssIntronicRegion	Inclusion	kcl.gc	late	-1.0959	0.570208	0.660488	3ssIntronicRegion	Inclusion	shuffle.gc	late
AGTAGG	2.61223	1.59818	2.36	3ssIntronicRegion	Inclusion	kcl.gc	late	-1.45007	0.555548	0.519158	3ssIntronicRegion	Inclusion	shuffle.gc	late
ATTGCA	2.61223	1.65748	2.46783	3ssIntronicRegion	Inclusion	kcl.gc	late	-1.20954	0.282294	0.634921	3ssIntronicRegion	Inclusion	shuffle.gc	late
GTATTT	2.59484	1.35565	1.72009	3ssIntronicRegion	Inclusion	kcl.gc	late	-0.682918	0.11409	0.88413	3ssIntronicRegion	Inclusion	shuffle.gc	late
TTTTTG	2.59026	1.37457	1.65418	3ssIntronicRegion	Inclusion	kcl.gc	late	0.243988	0.284061	0.829783	3ssIntronicRegion	Inclusion	shuffle.gc	late
AACTAA	2.58558	1.31479	2.00433	3ssIntronicRegion	Inclusion	kcl.gc	late	-1.2968	0.245966	0.706904	3ssIntronicRegion	Inclusion	shuffle.gc	late
AACATG	2.58558	1.6637	2.19524	3ssIntronicRegion	Inclusion	kcl.gc	late	1.58301	0.520269	1.46541	3ssIntronicRegion	Inclusion	shuffle.gc	late
TAAGTA	2.58558	1.79221	2.31959	3ssIntronicRegion	Inclusion	kcl.gc	late	1.3236	0.468627	1.45011	3ssIntronicRegion	Inclusion	shuffle.gc	late
AAGGAT	2.58558	1.87058	2.26471	3ssIntronicRegion	Inclusion	kcl.gc	late	0.839678	0.520269	1.46541	3ssIntronicRegion	Inclusion	shuffle.gc	late
TTCAGA	2.5772	1.79704	2.04319	3ssIntronicRegion	Inclusion	kcl.gc	late	-1.16305	0.597093	0.632289	3ssIntronicRegion	Inclusion	shuffle.gc	late
ATGGAC	2.57126	1.49857	2.62136	3ssIntronicRegion	Inclusion	kcl.gc	late	0.537775	0.323199	1.35102	3ssIntronicRegion	Inclusion	shuffle.gc	late
ACTGAA	2.55631	1.51504	1.90681	3ssIntronicRegion	Inclusion	kcl.gc	late	0.846532	0.210727	1.20726	3ssIntronicRegion	Inclusion	shuffle.gc	late
ATGAAA	2.53639	1.41838	1.91915	3ssIntronicRegion	Inclusion	kcl.gc	late	-0.917749	0.221156	0.754354	3ssIntronicRegion	Inclusion	shuffle.gc	late
CAAAAT	2.51766	1.44079	1.96712	3ssIntronicRegion	Inclusion	kcl.gc	late	-0.75555	0.0713987	0.85805	3ssIntronicRegion	Inclusion	shuffle.gc	late
TTGAGA	2.51766	1.44079	1.96712	3ssIntronicRegion	Inclusion	kcl.gc	late	0.272195	0.239163	1.21452	3ssIntronicRegion	Inclusion	shuffle.gc	late
TTCTAA	2.51485	1.39533	1.81319	3ssIntronicRegion	Inclusion	kcl.gc	late	-1.5138	0.417068	0.650441	3ssIntronicRegion	Inclusion	shuffle.gc	late
TGCTGC	2.49058	2.12097	2.20458	3ssIntronicRegion	Inclusion	kcl.gc	late	-0.777871	0.0582134	1.03324	3ssIntronicRegion	Inclusion	shuffle.gc	late
TTACTC	2.46441	1.53128	2.2608	3ssIntronicRegion	Inclusion	kcl.gc	late	0.0533013	0.104875	1.20858	3ssIntronicRegion	Inclusion	shuffle.gc	late
TAATGG	2.46441	1.59818	2.36	3ssIntronicRegion	Inclusion	kcl.gc	late	-0.882717	0.087005	0.775862	3ssIntronicRegion	Inclusion	shuffle.gc	late
GGTATT	2.46441	1.39932	2.23978	3ssIntronicRegion	Inclusion	kcl.gc	late	1.71422	0.197009	1.29434	3ssIntronicRegion	Inclusion	shuffle.gc	late
TACCCA	2.46441	1.59818	2.36	3ssIntronicRegion	Inclusion	kcl.gc	late	-1.2701	0.284828	0.654956	3ssIntronicRegion	Inclusion	shuffle.gc	late
CATATA	2.46441	1.65748	2.46783	3ssIntronicRegion	Inclusion	kcl.gc	late	0.180653	0.179002	1.23175	3ssIntronicRegion	Inclusion	shuffle.gc	late
CCTCTA	2.46258	1.51569	2.16963	3ssIntronicRegion	Inclusion	kcl.gc	late	-1.46527	0.419479	0.664151	3ssIntronicRegion	Inclusion	shuffle.gc	late
CATTAA	2.46258	1.31479	2.00433	3ssIntronicRegion	Inclusion	kcl.gc	late	1.52705	0.874989	1.8073	3ssIntronicRegion	Inclusion	shuffle.gc	late
TAGAAA	2.44369	1.44079	1.96712	3ssIntronicRegion	Inclusion	kcl.gc	late	1.93268	0.61867	1.46868	3ssIntronicRegion	Inclusion	shuffle.gc	late
AATTGT	2.42141	1.41838	1.91915	3ssIntronicRegion	Inclusion	kcl.gc	late	-1.36599	0.419755	0.678388	3ssIntronicRegion	Inclusion	shuffle.gc	late
ATAAAA	2.38513	2.31021	2.05756	3ssIntronicRegion	Inclusion	kcl.gc	late	-0.200363	0	1.02345	3ssIntronicRegion	Inclusion	shuffle.gc	late
ATGATT	2.38042	1.44991	2.03682	3ssIntronicRegion	Inclusion	kcl.gc	late	-0.68675	0.14842	0.776812	3ssIntronicRegion	Inclusion	shuffle.gc	late
CCATCT	2.3565	1.50689	1.8097	3ssIntronicRegion	Inclusion	kcl.gc	late	0.119739	0.0536936	1.03889	3ssIntronicRegion	Inclusion	shuffle.gc	late
ATAACC	2.34538	1.3474	2.4613	3ssIntronicRegion	Inclusion	kcl.gc	late	-1.59138	0.615853	0.457053	3ssIntronicRegion	Inclusion	shuffle.gc	late
ATTAAC	2.326	1.41545	2.11459	3ssIntronicRegion	Inclusion	kcl.gc	late	-1.13513	0.312151	0.614995	3ssIntronicRegion	Inclusion	shuffle.gc	late
TGATAG	2.32336	1.53128	2.2608	3ssIntronicRegion	Inclusion	kcl.gc	late	-0.0502077	0.101994	1.14583	3ssIntronicRegion	Inclusion	shuffle.gc	late
ACCAGC	2.32336	1.53128	2.2608	3ssIntronicRegion	Inclusion	kcl.gc	late	0.267682	0.28962	1.27685	3ssIntronicRegion	Inclusion	shuffle.gc	late
AAAGCA	2.26443	1.34841	1.86373	3ssIntronicRegion	Inclusion	kcl.gc	late	0.388963	0.199461	1.16071	3ssIntronicRegion	Inclusion	shuffle.gc	late
TTTCTA	2.25464	1.37025	1.74877	3ssIntronicRegion	Inclusion	kcl.gc	late	-0.134921	0	0.952794	3ssIntronicRegion	Inclusion	shuffle.gc	late
TTTAAT	2.23996	1.55612	1.75949	3ssIntronicRegion	Inclusion	kcl.gc	late	-0.56548	0.108319	0.883358	3ssIntronicRegion	Inclusion	shuffle.gc	late
AAAGAA	2.23076	1.93702	1.975	3ssIntronicRegion	Inclusion	kcl.gc	late	-1.171	0	0.998729	3ssIntronicRegion	Inclusion	shuffle.gc	late
ATTTGA	2.17769	1.57905	1.9986	3ssIntronicRegion	Inclusion	kcl.gc	late	0.322833	0.423205	1.32543	3ssIntronicRegion	Inclusion	shuffle.gc	late
TGTCTA	2.12627	1.48734	2.10127	3ssIntronicRegion	Inclusion	kcl.gc	late	-1.67564	0.685231	0.488277	3ssIntronicRegion	Inclusion	shuffle.gc	late
AATAAA	2.11039	1.49422	1.78036	3ssIntronicRegion	Inclusion	kcl.gc	late	-0.266474	0.196609	1.13918	3ssIntronicRegion	Inclusion	shuffle.gc	late
AGACAT	2.10164	1.31479	2.00433	3ssIntronicRegion	Inclusion	kcl.gc	late	-0.693458	0.0710727	0.836323	3ssIntronicRegion	Inclusion	shuffle.gc	late
TCTATA	2.08292	1.36266	1.95299	3ssIntronicRegion	Inclusion	kcl.gc	late	-0.68675	0.14842	0.776812	3ssIntronicRegion	Inclusion	shuffle.gc	late
TCAAAT	2.07902	1.41545	2.11459	3ssIntronicRegion	Inclusion	kcl.gc	late	0.0145754	0.0792437	1.11284	3ssIntronicRegion	Inclusion	shuffle.gc	late
ATGATA	2.07902	1.41545	2.11459	3ssIntronicRegion	Inclusion	kcl.gc	late	-0.259717	0	1.0135	3ssIntronicRegion	Inclusion	shuffle.gc	late
GATTTA	1.9888	1.45688	1.93434	3ssIntronicRegion	Inclusion	kcl.gc	late	0.835894	0.335242	1.30417	3ssIntronicRegion	Inclusion	shuffle.gc	late
TTTACA	1.97255	1.55049	1.95173	3ssIntronicRegion	Inclusion	kcl.gc	late	-0.574163	0.381406	0.709364	3ssIntronicRegion	Inclusion	shuffle.gc	late
TTGATA	1.96227	1.41545	2.11459	3ssIntronicRegion	Inclusion	kcl.gc	late	1.64014	0.740166	1.75476	3ssIntronicRegion	Inclusion	shuffle.gc	late
ATTCAG	1.95382	1.32984	1.9	3ssIntronicRegion	Inclusion	kcl.gc	late	1.79076	0.67797	1.51377	3ssIntronicRegion	Inclusion	shuffle.gc	late
TGATTT	1.93634	1.61941	1.81145	3ssIntronicRegion	Inclusion	kcl.gc	late	-0.732805	0.311613	0.778923	3ssIntronicRegion	Inclusion	shuffle.gc	late
TTTTGT	1.82992	1.42731	1.6209	3ssIntronicRegion	Inclusion	kcl.gc	late	0.00840133	0.198106	1.13122	3ssIntronicRegion	Inclusion	shuffle.gc	late
ATATGT	1.72576	1.38885	1.87327	3ssIntronicRegion	Inclusion	kcl.gc	late	1.50723	0.540752	1.44181	3ssIntronicRegion	Inclusion	shuffle.gc	late
ATTTTG	1.57939	1.51734	1.73857	3ssIntronicRegion	Inclusion	kcl.gc	late	1.98725	1.0317	1.56789	3ssIntronicRegion	Inclusion	shuffle.gc	late
TAAAAT	1.40209	1.76651	1.87111	3ssIntronicRegion	Inclusion	kcl.gc	late	-1.03719	0.246587	0.796656	3ssIntronicRegion	Inclusion	shuffle.gc	late
TTTTAT	0.795784	1.43907	1.633	3ssIntronicRegion	Inclusion	kcl.gc	late	0.141171	0.273622	1.18529	3ssIntronicRegion	Inclusion	shuffle.gc	late
GAAGTA	5.83601	2.03362	19.3171	5ssExonicRegion	Inclusion	kcl.gc	early	-1.48513	0	0	5ssExonicRegion	Inclusion	shuffle.gc	early
GTACAT	5.83601	2.03362	19.3171	5ssExonicRegion	Inclusion	kcl.gc	early	-1.41499	0	0	5ssExonicRegion	Inclusion	shuffle.gc	early
AATCCC	5.83601	2.03362	19.3171	5ssExonicRegion	Inclusion	kcl.gc	early	-1.41499	0	0	5ssExonicRegion	Inclusion	shuffle.gc	early
ATTAAT	5.83601	2.03362	19.3171	5ssExonicRegion	Inclusion	kcl.gc	early	-1.42324	0	0	5ssExonicRegion	Inclusion	shuffle.gc	early
ATTCAA	5.60739	2.3831	13.0123	5ssExonicRegion	Inclusion	kcl.gc	early	-0.568901	0	0.91196	5ssExonicRegion	Inclusion	shuffle.gc	early
AAGAAA	5.50235	2.87451	4.7004	5ssExonicRegion	Inclusion	kcl.gc	early	1.35609	0.397791	1.95	5ssExonicRegion	Inclusion	shuffle.gc	early
TTCTCA	5.24032	2.81127	7.95949	5ssExonicRegion	Inclusion	kcl.gc	early	-0.85134	0	0.634884	5ssExonicRegion	Inclusion	shuffle.gc	early
TCTTCT	4.64998	2.8764	5.39221	5ssExonicRegion	Inclusion	kcl.gc	early	-1.89882	0.832298	0	5ssExonicRegion	Inclusion	shuffle.gc	early
CTCTAT	4.34706	2.06352	8.65844	5ssExonicRegion	Inclusion	kcl.gc	early	-1.44993	0	0	5ssExonicRegion	Inclusion	shuffle.gc	early
CCTACC	4.34706	2.06352	8.65844	5ssExonicRegion	Inclusion	kcl.gc	early	-1.48513	0	0	5ssExonicRegion	Inclusion	shuffle.gc	early
AAGTGC	4.12455	2.18783	6.55	5ssExonicRegion	Inclusion	kcl.gc	early	-1.41499	0	0	5ssExonicRegion	Inclusion	shuffle.gc	early
GAGTCA	4.12455	1.60338	5.17531	5ssExonicRegion	Inclusion	kcl.gc	early	-1.56596	0.217181	0	5ssExonicRegion	Inclusion	shuffle.gc	early
CTGTTA	3.84331	1.68145	9.64024	5ssExonicRegion	Inclusion	kcl.gc	early	0.221871	0.199001	1.61176	5ssExonicRegion	Inclusion	shuffle.gc	early
AACAAT	3.84331	1.68145	9.64024	5ssExonicRegion	Inclusion	kcl.gc	early	-1.48513	0	0	5ssExonicRegion	Inclusion	shuffle.gc	early
TTATGA	3.84331	1.68145	9.64024	5ssExonicRegion	Inclusion	kcl.gc	early	-0.568901	0	0.91196	5ssExonicRegion	Inclusion	shuffle.gc	early
TGCGGA	3.84331	1.68145	9.64024	5ssExonicRegion	Inclusion	kcl.gc	early	-1.45326	0	0	5ssExonicRegion	Inclusion	shuffle.gc	early
GAATCT	3.84331	1.68145	9.64024	5ssExonicRegion	Inclusion	kcl.gc	early	-0.672043	0	0.796512	5ssExonicRegion	Inclusion	shuffle.gc	early
CAGTAA	3.84331	1.68145	9.64024	5ssExonicRegion	Inclusion	kcl.gc	early	-0.159148	0.285866	1.60465	5ssExonicRegion	Inclusion	shuffle.gc	early
ATGGAC	3.84331	1.68145	9.64024	5ssExonicRegion	Inclusion	kcl.gc	early	-0.159148	0.285866	1.60465	5ssExonicRegion	Inclusion	shuffle.gc	early
GTCAGT	3.84331	1.68145	9.64024	5ssExonicRegion	Inclusion	kcl.gc	early	-1.44993	0	0	5ssExonicRegion	Inclusion	shuffle.gc	early
AGTAAA	3.84331	1.68145	9.64024	5ssExonicRegion	Inclusion	kcl.gc	early	-1.6083	0.209538	0	5ssExonicRegion	Inclusion	shuffle.gc	early
GTGCGG	3.84331	1.68145	9.64024	5ssExonicRegion	Inclusion	kcl.gc	early	-1.42324	0	0	5ssExonicRegion	Inclusion	shuffle.gc	early
CAAGTG	3.84331	1.68145	9.64024	5ssExonicRegion	Inclusion	kcl.gc	early	-0.159148	0.285866	1.60465	5ssExonicRegion	Inclusion	shuffle.gc	early
CCTTCA	3.71784	2.15082	4.9462	5ssExonicRegion	Inclusion	kcl.gc	early	-1.32481	0.308296	0.368673	5ssExonicRegion	Inclusion	shuffle.gc	early
TTTTTA	3.60159	1.97431	5.44792	5ssExonicRegion	Inclusion	kcl.gc	early	-1.56596	0.217181	0	5ssExonicRegion	Inclusion	shuffle.gc	early
GGAATT	3.60159	1.97431	5.44792	5ssExonicRegion	Inclusion	kcl.gc	early	-0.319269	0.23394	1.2814	5ssExonicRegion	Inclusion	shuffle.gc	early
GTGGTA	3.5643	1.81068	6.48148	5ssExonicRegion	Inclusion	kcl.gc	early	1.50425	0.860919	4.33725	5ssExonicRegion	Inclusion	shuffle.gc	early
TGACCA	3.5643	1.81068	6.48148	5ssExonicRegion	Inclusion	kcl.gc	early	-0.452964	0	1.06589	5ssExonicRegion	Inclusion	shuffle.gc	early
GTTTTT	3.5643	1.81068	6.48148	5ssExonicRegion	Inclusion	kcl.gc	early	-1.42324	0	0	5ssExonicRegion	Inclusion	shuffle.gc	early
CCTGAT	3.5643	1.81068	6.48148	5ssExonicRegion	Inclusion	kcl.gc	early	0.386715	0.456708	1.84538	5ssExonicRegion	Inclusion	shuffle.gc	early
GTAGAA	3.5643	1.81068	6.48148	5ssExonicRegion	Inclusion	kcl.gc	early	-0.568901	0	0.91196	5ssExonicRegion	Inclusion	shuffle.gc	early
AGGAAT	3.5643	1.81068	6.48148	5ssExonicRegion	Inclusion	kcl.gc	early	1.50425	0.860919	4.33725	5ssExonicRegion	Inclusion	shuffle.gc	early
GAATGT	3.5643	1.81068	6.48148	5ssExonicRegion	Inclusion	kcl.gc	early	-0.319269	0.23394	1.2814	5ssExonicRegion	Inclusion	shuffle.gc	early
AGAGTC	3.5643	1.81068	6.48148	5ssExonicRegion	Inclusion	kcl.gc	early	-1.45326	0	0	5ssExonicRegion	Inclusion	shuffle.gc	early
AAAGCC	3.37164	1.97961	4.38819	5ssExonicRegion	Inclusion	kcl.gc	early	-1.77723	0.631507	0	5ssExonicRegion	Inclusion	shuffle.gc	early
AACTCC	3.18296	1.78981	4.66071	5ssExonicRegion	Inclusion	kcl.gc	early	-0.931027	0	0.57611	5ssExonicRegion	Inclusion	shuffle.gc	early
TTCAGA	3.0719	1.82602	3.94177	5ssExonicRegion	Inclusion	kcl.gc	early	-1.26664	0.14536	0.392442	5ssExonicRegion	Inclusion	shuffle.gc	early
TGTGGT	3.00878	1.60338	5.17531	5ssExonicRegion	Inclusion	kcl.gc	early	0.221871	0.199001	1.61176	5ssExonicRegion	Inclusion	shuffle.gc	early
TTAATG	3.00878	1.60338	5.17531	5ssExonicRegion	Inclusion	kcl.gc	early	-1.56596	0.217181	0	5ssExonicRegion	Inclusion	shuffle.gc	early
CTGTTC	3.00878	1.60338	5.17531	5ssExonicRegion	Inclusion	kcl.gc	early	-0.452964	0	1.06589	5ssExonicRegion	Inclusion	shuffle.gc	early
TAGCAG	3.00878	1.60338	5.17531	5ssExonicRegion	Inclusion	kcl.gc	early	0.5792	0.528591	2.15686	5ssExonicRegion	Inclusion	shuffle.gc	early
TGCCTT	3.00878	1.60338	5.17531	5ssExonicRegion	Inclusion	kcl.gc	early	-1.6934	0.424915	0	5ssExonicRegion	Inclusion	shuffle.gc	early
AAACTT	3.00878	1.60338	5.17531	5ssExonicRegion	Inclusion	kcl.gc	early	-0.568901	0	0.91196	5ssExonicRegion	Inclusion	shuffle.gc	early
GAAGAA	2.95003	1.96154	3.33117	5ssExonicRegion	Inclusion	kcl.gc	early	0.885895	0.281903	1.44043	5ssExonicRegion	Inclusion	shuffle.gc	early
ATAGCA	2.90666	1.42588	6.41463	5ssExonicRegion	Inclusion	kcl.gc	early	-0.319269	0.23394	1.2814	5ssExonicRegion	Inclusion	shuffle.gc	early
AATCTG	2.90666	1.42588	6.41463	5ssExonicRegion	Inclusion	kcl.gc	early	0.386715	0.456708	1.84538	5ssExonicRegion	Inclusion	shuffle.gc	early
AGTCAT	2.90666	1.42588	6.41463	5ssExonicRegion	Inclusion	kcl.gc	early	2.12201	1.04351	6.51765	5ssExonicRegion	Inclusion	shuffle.gc	early
TCTAAA	2.90666	1.42588	6.41463	5ssExonicRegion	Inclusion	kcl.gc	early	-0.568901	0	0.91196	5ssExonicRegion	Inclusion	shuffle.gc	early
ACTCAA	2.90666	1.42588	6.41463	5ssExonicRegion	Inclusion	kcl.gc	early	-1.41499	0	0	5ssExonicRegion	Inclusion	shuffle.gc	early
TCAACA	2.90666	1.42588	6.41463	5ssExonicRegion	Inclusion	kcl.gc	early	-1.42324	0	0	5ssExonicRegion	Inclusion	shuffle.gc	early
AGTAGA	2.90666	1.42588	6.41463	5ssExonicRegion	Inclusion	kcl.gc	early	-0.159148	0.285866	1.60465	5ssExonicRegion	Inclusion	shuffle.gc	early
AGAGGA	2.88608	1.84567	3.12911	5ssExonicRegion	Inclusion	kcl.gc	early	-1.48693	0.469922	0.311628	5ssExonicRegion	Inclusion	shuffle.gc	early
TTCAAG	2.8357	1.62838	4.07031	5ssExonicRegion	Inclusion	kcl.gc	early	-1.20599	0.148954	0.41938	5ssExonicRegion	Inclusion	shuffle.gc	early
TTTTAA	2.8357	1.62838	4.07031	5ssExonicRegion	Inclusion	kcl.gc	early	0.5792	0.528591	2.15686	5ssExonicRegion	Inclusion	shuffle.gc	early
AATGGA	2.8357	1.78981	4.66071	5ssExonicRegion	Inclusion	kcl.gc	early	1.11578	0.75311	2.44643	5ssExonicRegion	Inclusion	shuffle.gc	early
TGAGGA	2.8347	1.76213	3.30128	5ssExonicRegion	Inclusion	kcl.gc	early	-0.466745	0	0.910924	5ssExonicRegion	Inclusion	shuffle.gc	early
TCAAAG	2.80811	1.68739	3.57652	5ssExonicRegion	Inclusion	kcl.gc	early	-1.38078	0.305624	0.347545	5ssExonicRegion	Inclusion	shuffle.gc	early
ATGAGG	2.80811	1.68739	3.57652	5ssExonicRegion	Inclusion	kcl.gc	early	-1.20599	0.148954	0.41938	5ssExonicRegion	Inclusion	shuffle.gc	early
TCACCT	2.58302	1.60338	5.17531	5ssExonicRegion	Inclusion	kcl.gc	early	0.386715	0.528591	2.15686	5ssExonicRegion	Inclusion	shuffle.gc	early
AACCTC	2.58302	1.42929	4.30453	5ssExonicRegion	Inclusion	kcl.gc	early	0.747798	0.397791	1.95	5ssExonicRegion	Inclusion	shuffle.gc	early
CTTCAA	2.53993	1.48577	3.61111	5ssExonicRegion	Inclusion	kcl.gc	early	-1.20599	0.148954	0.41938	5ssExonicRegion	Inclusion	shuffle.gc	early
TTCTTC	2.53993	1.62838	4.07031	5ssExonicRegion	Inclusion	kcl.gc	early	-0.0517706	0.173477	1.28471	5ssExonicRegion	Inclusion	shuffle.gc	early
TAGAAG	2.53993	1.48577	3.61111	5ssExonicRegion	Inclusion	kcl.gc	early	-0.672043	0	0.796512	5ssExonicRegion	Inclusion	shuffle.gc	early
GAAAAT	2.53993	1.48577	3.61111	5ssExonicRegion	Inclusion	kcl.gc	early	-1.56596	0.217181	0	5ssExonicRegion	Inclusion	shuffle.gc	early
CAAACT	2.53993	1.62838	4.07031	5ssExonicRegion	Inclusion	kcl.gc	early	1.61137	1.09302	3.93571	5ssExonicRegion	Inclusion	shuffle.gc	early
CTTCTT	2.36078	1.56161	3.27215	5ssExonicRegion	Inclusion	kcl.gc	early	-1.43475	0.300011	0.328641	5ssExonicRegion	Inclusion	shuffle.gc	early
TCAGAA	2.36078	1.447	3.01461	5ssExonicRegion	Inclusion	kcl.gc	early	-1.20599	0.148954	0.41938	5ssExonicRegion	Inclusion	shuffle.gc	early
AAAAAC	2.31685	1.42588	6.41463	5ssExonicRegion	Inclusion	kcl.gc	early	-1.48513	0	0	5ssExonicRegion	Inclusion	shuffle.gc	early
ATGTGG	2.28285	1.35878	3.24375	5ssExonicRegion	Inclusion	kcl.gc	early	-0.466745	0	0.910924	5ssExonicRegion	Inclusion	shuffle.gc	early
GAGGGA	2.23993	1.42929	4.30453	5ssExonicRegion	Inclusion	kcl.gc	early	0.221871	0.199001	1.61176	5ssExonicRegion	Inclusion	shuffle.gc	early
TGAAGA	2.16778	1.34217	2.79385	5ssExonicRegion	Inclusion	kcl.gc	early	0.515144	0.291941	1.52799	5ssExonicRegion	Inclusion	shuffle.gc	early
AGAAGA	1.83395	1.44132	2.70287	5ssExonicRegion	Inclusion	kcl.gc	early	-0.854591	0	0.703268	5ssExonicRegion	Inclusion	shuffle.gc	early
AGCTAC	8.90069	2.9641	22.6852	5ssExonicRegion	Inclusion	kcl.gc	late	0.0722055	0.339521	2.22566	5ssExonicRegion	Inclusion	shuffle.gc	late
GTGGAC	8.90069	2.9641	22.6852	5ssExonicRegion	Inclusion	kcl.gc	late	-0.734275	0	0.735988	5ssExonicRegion	Inclusion	shuffle.gc	late
TCCATG	7.42865	3.11281	13.7103	5ssExonicRegion	Inclusion	kcl.gc	late	1.56052	0.805622	4.49107	5ssExonicRegion	Inclusion	shuffle.gc	late
AAAAAA	6.85796	1.85225	5.63657	5ssExonicRegion	Inclusion	kcl.gc	late	1.52015	0.327841	1.48949	5ssExonicRegion	Inclusion	shuffle.gc	late
CTCAAG	5.95463	2.49045	11.3194	5ssExonicRegion	Inclusion	kcl.gc	late	-1.16992	0.155729	0.438053	5ssExonicRegion	Inclusion	shuffle.gc	late
AAATTC	5.95463	2.49045	11.3194	5ssExonicRegion	Inclusion	kcl.gc	late	-1.65504	0.444351	0	5ssExonicRegion	Inclusion	shuffle.gc	late
GAATCT	5.95463	1.8907	8.97248	5ssExonicRegion	Inclusion	kcl.gc	late	1.84377	0.657968	2.24775	5ssExonicRegion	Inclusion	shuffle.gc	late
AATCCC	4.7733	2.38139	6.8271	5ssExonicRegion	Inclusion	kcl.gc	late	0.328616	0.327841	1.48949	5ssExonicRegion	Inclusion	shuffle.gc	late
ACAGAA	4.7461	2.9028	4.6699	5ssExonicRegion	Inclusion	kcl.gc	late	-0.477807	0	0.881818	5ssExonicRegion	Inclusion	shuffle.gc	late
GTAAAA	4.73161	1.6554	13.3636	5ssExonicRegion	Inclusion	kcl.gc	late	-1.71619	0.440861	0	5ssExonicRegion	Inclusion	shuffle.gc	late
TTTACA	4.73161	1.6554	13.3636	5ssExonicRegion	Inclusion	kcl.gc	late	-1.4306	0	0	5ssExonicRegion	Inclusion	shuffle.gc	late
CTACTC	4.73161	1.6554	13.3636	5ssExonicRegion	Inclusion	kcl.gc	late	-1.4306	0	0	5ssExonicRegion	Inclusion	shuffle.gc	late
TGAACC	4.73161	1.6554	13.3636	5ssExonicRegion	Inclusion	kcl.gc	late	-1.4306	0	0	5ssExonicRegion	Inclusion	shuffle.gc	late
GTCATT	4.73161	1.6554	13.3636	5ssExonicRegion	Inclusion	kcl.gc	late	-1.53319	0.228915	0	5ssExonicRegion	Inclusion	shuffle.gc	late
TAGCAA	4.73161	1.6554	13.3636	5ssExonicRegion	Inclusion	kcl.gc	late	-1.65504	0.444351	0	5ssExonicRegion	Inclusion	shuffle.gc	late
CGGGAA	4.73161	1.6554	13.3636	5ssExonicRegion	Inclusion	kcl.gc	late	-0.971942	0	0.549779	5ssExonicRegion	Inclusion	shuffle.gc	late
GATGTA	4.73161	1.6554	13.3636	5ssExonicRegion	Inclusion	kcl.gc	late	0.628338	0.514812	2.23661	5ssExonicRegion	Inclusion	shuffle.gc	late
AAGCTA	4.73161	1.6554	13.3636	5ssExonicRegion	Inclusion	kcl.gc	late	0.0722055	0.339521	2.22566	5ssExonicRegion	Inclusion	shuffle.gc	late
TCCATT	4.73161	1.6554	13.3636	5ssExonicRegion	Inclusion	kcl.gc	late	-0.424102	0	1.10841	5ssExonicRegion	Inclusion	shuffle.gc	late
TTGATA	4.73161	1.6554	13.3636	5ssExonicRegion	Inclusion	kcl.gc	late	-0.424102	0	1.10841	5ssExonicRegion	Inclusion	shuffle.gc	late
GGTGGA	4.64041	1.68285	3.87717	5ssExonicRegion	Inclusion	kcl.gc	late	0.913995	0.273675	1.37622	5ssExonicRegion	Inclusion	shuffle.gc	late
TAAAGG	4.58505	2.13462	7.53086	5ssExonicRegion	Inclusion	kcl.gc	late	-1.53319	0.228915	0	5ssExonicRegion	Inclusion	shuffle.gc	late
ACCTTC	4.58505	2.13462	7.53086	5ssExonicRegion	Inclusion	kcl.gc	late	-1.71619	0.440861	0	5ssExonicRegion	Inclusion	shuffle.gc	late
TTAATT	4.48061	1.8907	8.97248	5ssExonicRegion	Inclusion	kcl.gc	late	-1.47654	0	0	5ssExonicRegion	Inclusion	shuffle.gc	late
CCATTA	4.48061	1.8907	8.97248	5ssExonicRegion	Inclusion	kcl.gc	late	-1.47654	0	0	5ssExonicRegion	Inclusion	shuffle.gc	late
CGTCCC	4.48061	1.8907	8.97248	5ssExonicRegion	Inclusion	kcl.gc	late	-0.215372	0.253387	1.48083	5ssExonicRegion	Inclusion	shuffle.gc	late
AACCCA	4.48061	1.8907	8.97248	5ssExonicRegion	Inclusion	kcl.gc	late	-0.215372	0.253387	1.48083	5ssExonicRegion	Inclusion	shuffle.gc	late
GTGGAG	4.35689	1.4266	3.74228	5ssExonicRegion	Inclusion	kcl.gc	late	0.605491	0.116928	1.18788	5ssExonicRegion	Inclusion	shuffle.gc	late
GGCCCA	4.05489	2.11046	5.45047	5ssExonicRegion	Inclusion	kcl.gc	late	1.73201	0.818922	2.52803	5ssExonicRegion	Inclusion	shuffle.gc	late
GGAAAA	3.79443	2.58056	3.67437	5ssExonicRegion	Inclusion	kcl.gc	late	0.0618947	0	0.882883	5ssExonicRegion	Inclusion	shuffle.gc	late
AAAGGA	3.752	2.25738	3.77622	5ssExonicRegion	Inclusion	kcl.gc	late	-1.2721	0.255436	0.483135	5ssExonicRegion	Inclusion	shuffle.gc	late
TAGACA	3.73096	1.85225	5.63657	5ssExonicRegion	Inclusion	kcl.gc	late	-0.734275	0	0.735988	5ssExonicRegion	Inclusion	shuffle.gc	late
TTCATG	3.73096	1.85225	5.63657	5ssExonicRegion	Inclusion	kcl.gc	late	-1.95013	0.865005	0	5ssExonicRegion	Inclusion	shuffle.gc	late
CTCCAT	3.50579	1.88069	4.53271	5ssExonicRegion	Inclusion	kcl.gc	late	2.21509	1.10001	4.52252	5ssExonicRegion	Inclusion	shuffle.gc	late
AGAAAA	3.49851	1.9331	3.18195	5ssExonicRegion	Inclusion	kcl.gc	late	0.338236	0.248174	1.40195	5ssExonicRegion	Inclusion	shuffle.gc	late
AGGAAA	3.48902	1.72695	2.65912	5ssExonicRegion	Inclusion	kcl.gc	late	-0.683045	0	0.826014	5ssExonicRegion	Inclusion	shuffle.gc	late
CATGAT	3.38149	1.59006	5.96942	5ssExonicRegion	Inclusion	kcl.gc	late	-1.47654	0	0	5ssExonicRegion	Inclusion	shuffle.gc	late
TCAAAC	3.38149	1.59006	5.96942	5ssExonicRegion	Inclusion	kcl.gc	late	-1.47654	0	0	5ssExonicRegion	Inclusion	shuffle.gc	late
AAATAC	3.38149	1.59006	5.96942	5ssExonicRegion	Inclusion	kcl.gc	late	-0.591839	0	0.884956	5ssExonicRegion	Inclusion	shuffle.gc	late
ATTTCC	3.38149	1.59006	5.96942	5ssExonicRegion	Inclusion	kcl.gc	late	-0.215372	0.253387	1.48083	5ssExonicRegion	Inclusion	shuffle.gc	late
CCATGG	3.38149	1.59006	5.96942	5ssExonicRegion	Inclusion	kcl.gc	late	0.628338	0.514812	2.23661	5ssExonicRegion	Inclusion	shuffle.gc	late
GAACCC	3.12258	1.62071	4.5	5ssExonicRegion	Inclusion	kcl.gc	late	0.628338	0.514812	2.23661	5ssExonicRegion	Inclusion	shuffle.gc	late
CTTTGT	3.12258	1.62071	4.5	5ssExonicRegion	Inclusion	kcl.gc	late	1.73201	0.818922	2.52803	5ssExonicRegion	Inclusion	shuffle.gc	late
GAAACC	3.12258	1.62071	4.5	5ssExonicRegion	Inclusion	kcl.gc	late	-1.89352	0.637482	0	5ssExonicRegion	Inclusion	shuffle.gc	late
GAAAAT	3.07778	1.93714	3.98703	5ssExonicRegion	Inclusion	kcl.gc	late	0.0106836	0	0.801948	5ssExonicRegion	Inclusion	shuffle.gc	late
AAGGAA	3.03274	1.47006	2.56911	5ssExonicRegion	Inclusion	kcl.gc	late	-1.18199	0.223348	0.593366	5ssExonicRegion	Inclusion	shuffle.gc	late
CATTAA	3.00659	1.32094	6.66818	5ssExonicRegion	Inclusion	kcl.gc	late	-0.734275	0	0.735988	5ssExonicRegion	Inclusion	shuffle.gc	late
AGTCAT	3.00659	1.32094	6.66818	5ssExonicRegion	Inclusion	kcl.gc	late	0.999857	0.637845	2.9881	5ssExonicRegion	Inclusion	shuffle.gc	late
AATAGT	3.00659	1.32094	6.66818	5ssExonicRegion	Inclusion	kcl.gc	late	2.682	1.05159	9	5ssExonicRegion	Inclusion	shuffle.gc	late
TTCGAG	3.00659	1.32094	6.66818	5ssExonicRegion	Inclusion	kcl.gc	late	0.999857	0.637845	2.9881	5ssExonicRegion	Inclusion	shuffle.gc	late
GTCAAC	3.00659	1.32094	6.66818	5ssExonicRegion	Inclusion	kcl.gc	late	0.577245	0.475395	4.46018	5ssExonicRegion	Inclusion	shuffle.gc	late
TCGGGA	3.00659	1.32094	6.66818	5ssExonicRegion	Inclusion	kcl.gc	late	-1.53319	0.228915	0	5ssExonicRegion	Inclusion	shuffle.gc	late
GATAAC	3.00659	1.32094	6.66818	5ssExonicRegion	Inclusion	kcl.gc	late	-1.65504	0.444351	0	5ssExonicRegion	Inclusion	shuffle.gc	late
ATTAGG	3.00659	1.32094	6.66818	5ssExonicRegion	Inclusion	kcl.gc	late	-1.47654	0	0	5ssExonicRegion	Inclusion	shuffle.gc	late
AAAGGT	3.00659	1.32094	6.66818	5ssExonicRegion	Inclusion	kcl.gc	late	-0.591839	0	0.884956	5ssExonicRegion	Inclusion	shuffle.gc	late
GTTCTT	3.00659	1.32094	6.66818	5ssExonicRegion	Inclusion	kcl.gc	late	-0.859425	0	0.629583	5ssExonicRegion	Inclusion	shuffle.gc	late
TTCCAT	3.00659	1.32094	6.66818	5ssExonicRegion	Inclusion	kcl.gc	late	-1.41611	0	0	5ssExonicRegion	Inclusion	shuffle.gc	late
ACCCCG	3.00659	1.32094	6.66818	5ssExonicRegion	Inclusion	kcl.gc	late	-0.591839	0	0.884956	5ssExonicRegion	Inclusion	shuffle.gc	late
TTTAAT	3.00659	1.32094	6.66818	5ssExonicRegion	Inclusion	kcl.gc	late	-1.4306	0	0	5ssExonicRegion	Inclusion	shuffle.gc	late
ATAATA	3.00659	1.32094	6.66818	5ssExonicRegion	Inclusion	kcl.gc	late	-0.424102	0	1.10841	5ssExonicRegion	Inclusion	shuffle.gc	late
GTCTCA	3.00659	1.32094	6.66818	5ssExonicRegion	Inclusion	kcl.gc	late	0.349511	0.208821	1.78571	5ssExonicRegion	Inclusion	shuffle.gc	late
TAATGA	3.00659	1.32094	6.66818	5ssExonicRegion	Inclusion	kcl.gc	late	-0.734275	0	0.735988	5ssExonicRegion	Inclusion	shuffle.gc	late
TCATTC	3.00659	1.32094	6.66818	5ssExonicRegion	Inclusion	kcl.gc	late	0.349511	0.208821	1.78571	5ssExonicRegion	Inclusion	shuffle.gc	late
TTAGGT	3.00659	1.32094	6.66818	5ssExonicRegion	Inclusion	kcl.gc	late	-1.53319	0.228915	0	5ssExonicRegion	Inclusion	shuffle.gc	late
GGAACC	3.00659	1.32094	6.66818	5ssExonicRegion	Inclusion	kcl.gc	late	0.628338	0.514812	2.23661	5ssExonicRegion	Inclusion	shuffle.gc	late
GTAAGA	3.00659	1.32094	6.66818	5ssExonicRegion	Inclusion	kcl.gc	late	0.0722055	0.339521	2.22566	5ssExonicRegion	Inclusion	shuffle.gc	late
ATCCCA	2.76816	1.60086	3.17642	5ssExonicRegion	Inclusion	kcl.gc	late	-1.34241	0.318901	0.363569	5ssExonicRegion	Inclusion	shuffle.gc	late
TGAAGA	2.71767	1.62145	2.94849	5ssExonicRegion	Inclusion	kcl.gc	late	-0.585234	0	0.882883	5ssExonicRegion	Inclusion	shuffle.gc	late
TCAGCA	2.69695	1.51056	3.38551	5ssExonicRegion	Inclusion	kcl.gc	late	-0.0588882	0.111438	1.11136	5ssExonicRegion	Inclusion	shuffle.gc	late
GAATTT	2.68863	1.59006	5.96942	5ssExonicRegion	Inclusion	kcl.gc	late	1.84377	1.18867	3.63636	5ssExonicRegion	Inclusion	shuffle.gc	late
TAAAGA	2.68863	1.3559	4.46789	5ssExonicRegion	Inclusion	kcl.gc	late	-0.971942	0	0.549779	5ssExonicRegion	Inclusion	shuffle.gc	late
ATTAAA	2.68863	1.3559	4.46789	5ssExonicRegion	Inclusion	kcl.gc	late	-0.971942	0	0.549779	5ssExonicRegion	Inclusion	shuffle.gc	late
ACTCTT	2.68863	1.3559	4.46789	5ssExonicRegion	Inclusion	kcl.gc	late	-0.859425	0	0.629583	5ssExonicRegion	Inclusion	shuffle.gc	late
TGATGT	2.68863	1.3559	4.46789	5ssExonicRegion	Inclusion	kcl.gc	late	-0.063807	0.171446	1.27041	5ssExonicRegion	Inclusion	shuffle.gc	late
TACCTT	2.68863	1.3559	4.46789	5ssExonicRegion	Inclusion	kcl.gc	late	-1.47654	0	0	5ssExonicRegion	Inclusion	shuffle.gc	late
AACAGT	2.65469	1.4266	3.74228	5ssExonicRegion	Inclusion	kcl.gc	late	-1.16992	0.155729	0.438053	5ssExonicRegion	Inclusion	shuffle.gc	late
AAAAAT	2.65469	1.4266	3.74228	5ssExonicRegion	Inclusion	kcl.gc	late	-0.591839	0	0.884956	5ssExonicRegion	Inclusion	shuffle.gc	late
ACACAA	2.65469	1.4266	3.74228	5ssExonicRegion	Inclusion	kcl.gc	late	-0.591839	0	0.884956	5ssExonicRegion	Inclusion	shuffle.gc	late
ACTCAG	2.65469	1.4266	3.74228	5ssExonicRegion	Inclusion	kcl.gc	late	0.161482	0.145267	1.33784	5ssExonicRegion	Inclusion	shuffle.gc	late
GTGGCT	2.65469	1.4266	3.74228	5ssExonicRegion	Inclusion	kcl.gc	late	0.328616	0.327841	1.48949	5ssExonicRegion	Inclusion	shuffle.gc	late
TGTTCT	2.65469	1.4266	3.74228	5ssExonicRegion	Inclusion	kcl.gc	late	-1.83562	0.654736	0	5ssExonicRegion	Inclusion	shuffle.gc	late
TTAAAG	2.65469	1.4266	3.74228	5ssExonicRegion	Inclusion	kcl.gc	late	-0.859425	0	0.629583	5ssExonicRegion	Inclusion	shuffle.gc	late
CACTCC	2.65469	1.4266	3.74228	5ssExonicRegion	Inclusion	kcl.gc	late	-0.62405	0	0.801948	5ssExonicRegion	Inclusion	shuffle.gc	late
TGAATG	2.65469	1.4266	3.74228	5ssExonicRegion	Inclusion	kcl.gc	late	1.2608	0.605492	2.25909	5ssExonicRegion	Inclusion	shuffle.gc	late
GCTGAG	2.38398	1.33451	2.59592	5ssExonicRegion	Inclusion	kcl.gc	late	0.467457	0.248174	1.40195	5ssExonicRegion	Inclusion	shuffle.gc	late
CAAGAG	2.38282	1.35919	3.00312	5ssExonicRegion	Inclusion	kcl.gc	late	1.2608	0.605492	2.25909	5ssExonicRegion	Inclusion	shuffle.gc	late
CAACAG	2.38282	1.35919	3.00312	5ssExonicRegion	Inclusion	kcl.gc	late	0.0106836	0.136903	1.21376	5ssExonicRegion	Inclusion	shuffle.gc	late
GAAGAA	2.12177	1.36876	2.19437	5ssExonicRegion	Inclusion	kcl.gc	late	-1.19138	0.200513	0.66993	5ssExonicRegion	Inclusion	shuffle.gc	late
AAGCGA	7.22751	2.74119	10.9583	5ssIntronicRegion	Inclusion	kcl.gc	early	0.386675	0.528591	2.15686	5ssIntronicRegion	Inclusion	shuffle.gc	early
GCGGAA	5.60722	2.3831	13.0123	5ssIntronicRegion	Inclusion	kcl.gc	early	0.0446267	0.354811	2.14341	5ssIntronicRegion	Inclusion	shuffle.gc	early
TGCGGA	5.60722	2.3831	13.0123	5ssIntronicRegion	Inclusion	kcl.gc	early	-0.452924	0	1.06589	5ssIntronicRegion	Inclusion	shuffle.gc	early
ATATAT	5.32541	2.37396	2.7831	5ssIntronicRegion	Inclusion	kcl.gc	early	0.892118	0.443827	1.46273	5ssIntronicRegion	Inclusion	shuffle.gc	early
TCCAGG	5.30736	4.41368	3.61683	5ssIntronicRegion	Inclusion	kcl.gc	early	1.28039	0.821982	1.58539	5ssIntronicRegion	Inclusion	shuffle.gc	early
AATAGG	5.0617	3.09873	4.21997	5ssIntronicRegion	Inclusion	kcl.gc	early	-0.854348	0.121931	0.665015	5ssIntronicRegion	Inclusion	shuffle.gc	early
TTTTTC	4.91393	3.83451	2.77116	5ssIntronicRegion	Inclusion	kcl.gc	early	-0.387675	0.0545182	0.905449	5ssIntronicRegion	Inclusion	shuffle.gc	early
AATCAA	4.87166	2.2994	2.70031	5ssIntronicRegion	Inclusion	kcl.gc	early	-0.593085	0	0.855307	5ssIntronicRegion	Inclusion	shuffle.gc	early
TTACTC	4.58019	2.88513	3.61644	5ssIntronicRegion	Inclusion	kcl.gc	early	-1.19845	0.301135	0.589788	5ssIntronicRegion	Inclusion	shuffle.gc	early
GACTTA	4.56132	2.96386	3.49306	5ssIntronicRegion	Inclusion	kcl.gc	early	0.294829	0.207673	1.25448	5ssIntronicRegion	Inclusion	shuffle.gc	early
ATAAAT	4.55425	3.14152	2.88386	5ssIntronicRegion	Inclusion	kcl.gc	early	-0.290023	0.161435	1.16769	5ssIntronicRegion	Inclusion	shuffle.gc	early
AAATAG	4.488	2.49623	2.7688	5ssIntronicRegion	Inclusion	kcl.gc	early	0.895866	0.575872	1.57287	5ssIntronicRegion	Inclusion	shuffle.gc	early
TATATG	4.24501	2.38916	2.68875	5ssIntronicRegion	Inclusion	kcl.gc	early	0.538073	0.412993	1.44934	5ssIntronicRegion	Inclusion	shuffle.gc	early
GTTGAA	4.23284	2.88513	3.61644	5ssIntronicRegion	Inclusion	kcl.gc	early	-1.37665	0.389167	0.479638	5ssIntronicRegion	Inclusion	shuffle.gc	early
GTAAAA	4.16506	3.46173	3.48529	5ssIntronicRegion	Inclusion	kcl.gc	early	0.549764	0	0.883721	5ssIntronicRegion	Inclusion	shuffle.gc	early
GTATAT	4.16506	2.24612	2.80425	5ssIntronicRegion	Inclusion	kcl.gc	early	0.0963452	0.319014	1.34338	5ssIntronicRegion	Inclusion	shuffle.gc	early
AGTAAA	4.08663	3.10157	2.96133	5ssIntronicRegion	Inclusion	kcl.gc	early	-0.368877	0.0790069	0.802206	5ssIntronicRegion	Inclusion	shuffle.gc	early
TAATAG	4.06484	2.36004	3.39333	5ssIntronicRegion	Inclusion	kcl.gc	early	-1.93764	0.829553	0	5ssIntronicRegion	Inclusion	shuffle.gc	early
AAAAGC	3.99465	2.56882	3.0625	5ssIntronicRegion	Inclusion	kcl.gc	early	-1.8664	1.02821	0.369534	5ssIntronicRegion	Inclusion	shuffle.gc	early
TGTAAT	3.99465	2.6149	3.16765	5ssIntronicRegion	Inclusion	kcl.gc	early	0.300781	0	0.947606	5ssIntronicRegion	Inclusion	shuffle.gc	early
AATACT	3.95365	2.41002	3.11303	5ssIntronicRegion	Inclusion	kcl.gc	early	-0.292089	0	1.03265	5ssIntronicRegion	Inclusion	shuffle.gc	early
AGAAAT	3.95238	3.57112	2.89973	5ssIntronicRegion	Inclusion	kcl.gc	early	0.515156	0.137647	1.12928	5ssIntronicRegion	Inclusion	shuffle.gc	early
ATTTTA	3.92192	2.90175	2.43164	5ssIntronicRegion	Inclusion	kcl.gc	early	-0.229475	0	0.947033	5ssIntronicRegion	Inclusion	shuffle.gc	early
ATAGGT	3.87941	2.48391	3.57895	5ssIntronicRegion	Inclusion	kcl.gc	early	-0.647864	0	0.82764	5ssIntronicRegion	Inclusion	shuffle.gc	early
AAATTT	3.8794	2.88873	2.60239	5ssIntronicRegion	Inclusion	kcl.gc	early	-0.93013	0.146268	0.778481	5ssIntronicRegion	Inclusion	shuffle.gc	early
TATCGT	3.84319	1.68145	9.64024	5ssIntronicRegion	Inclusion	kcl.gc	early	-1.52436	0.220524	0	5ssIntronicRegion	Inclusion	shuffle.gc	early
CGGAGT	3.84319	1.68145	9.64024	5ssIntronicRegion	Inclusion	kcl.gc	early	-1.52436	0.220524	0	5ssIntronicRegion	Inclusion	shuffle.gc	early
GAAATT	3.8196	2.22982	2.69231	5ssIntronicRegion	Inclusion	kcl.gc	early	0.365297	0.332118	1.43281	5ssIntronicRegion	Inclusion	shuffle.gc	early
TAGAAA	3.74816	1.85578	2.22145	5ssIntronicRegion	Inclusion	kcl.gc	early	-0.439194	0.147301	0.80686	5ssIntronicRegion	Inclusion	shuffle.gc	early
CAAATT	3.73386	1.76467	2.80556	5ssIntronicRegion	Inclusion	kcl.gc	early	-1.41337	0.466895	0.515873	5ssIntronicRegion	Inclusion	shuffle.gc	early
AGAATC	3.63237	2.73205	3.23065	5ssIntronicRegion	Inclusion	kcl.gc	early	1.62944	0.963047	1.93321	5ssIntronicRegion	Inclusion	shuffle.gc	early
ACCGAC	3.60125	1.42929	4.30453	5ssIntronicRegion	Inclusion	kcl.gc	early	-1.73524	0.414076	0	5ssIntronicRegion	Inclusion	shuffle.gc	early
TCTAAC	3.58274	2.00453	2.99676	5ssIntronicRegion	Inclusion	kcl.gc	early	-0.352664	0	1.02361	5ssIntronicRegion	Inclusion	shuffle.gc	early
CAGTAA	3.58274	2.00453	2.99676	5ssIntronicRegion	Inclusion	kcl.gc	early	-1.67999	0.635138	0.269464	5ssIntronicRegion	Inclusion	shuffle.gc	early
GTAATA	3.50084	1.76213	3.30128	5ssIntronicRegion	Inclusion	kcl.gc	early	-0.711312	0	0.746021	5ssIntronicRegion	Inclusion	shuffle.gc	early
CTTTGC	3.49801	1.77019	2.15455	5ssIntronicRegion	Inclusion	kcl.gc	early	-1.23063	0.464965	0.62398	5ssIntronicRegion	Inclusion	shuffle.gc	early
AAACTA	3.43884	1.66298	2.47073	5ssIntronicRegion	Inclusion	kcl.gc	early	0.0333782	0.185451	1.19276	5ssIntronicRegion	Inclusion	shuffle.gc	early
AATAGT	3.43863	2.2066	3.05632	5ssIntronicRegion	Inclusion	kcl.gc	early	0.709845	0.534869	1.57333	5ssIntronicRegion	Inclusion	shuffle.gc	early
ATATGT	3.41767	1.72167	2.19757	5ssIntronicRegion	Inclusion	kcl.gc	early	-0.275469	0.172148	1.17837	5ssIntronicRegion	Inclusion	shuffle.gc	early
GTTTTT	3.4172	1.41648	1.77459	5ssIntronicRegion	Inclusion	kcl.gc	early	0.176672	0	0.973639	5ssIntronicRegion	Inclusion	shuffle.gc	early
ACATAA	3.39746	2.6149	3.16765	5ssIntronicRegion	Inclusion	kcl.gc	early	-0.703176	0	0.880759	5ssIntronicRegion	Inclusion	shuffle.gc	early
AAATCA	3.39746	2.71448	3.02449	5ssIntronicRegion	Inclusion	kcl.gc	early	1.37548	0.433252	1.42046	5ssIntronicRegion	Inclusion	shuffle.gc	early
ACATTA	3.3834	1.80365	2.93333	5ssIntronicRegion	Inclusion	kcl.gc	early	-0.0896613	0.100723	1.14983	5ssIntronicRegion	Inclusion	shuffle.gc	early
AGCACA	3.36922	2.15317	2.55052	5ssIntronicRegion	Inclusion	kcl.gc	early	-0.855082	0.359416	0.661376	5ssIntronicRegion	Inclusion	shuffle.gc	early
TATATT	3.35088	2.03827	2.622	5ssIntronicRegion	Inclusion	kcl.gc	early	2.34935	1.12524	2.03023	5ssIntronicRegion	Inclusion	shuffle.gc	early
ATACTA	3.33498	1.6038	2.86466	5ssIntronicRegion	Inclusion	kcl.gc	early	0.57003	0.421632	1.55343	5ssIntronicRegion	Inclusion	shuffle.gc	early
AAATAC	3.3216	1.91283	2.55308	5ssIntronicRegion	Inclusion	kcl.gc	early	-1.05267	0.279531	0.676034	5ssIntronicRegion	Inclusion	shuffle.gc	early
TTTCAG	3.31455	1.65879	1.95299	5ssIntronicRegion	Inclusion	kcl.gc	early	-0.0727223	0.126824	1.10859	5ssIntronicRegion	Inclusion	shuffle.gc	early
GAAATC	3.30092	2.2066	3.05632	5ssIntronicRegion	Inclusion	kcl.gc	early	0.921227	0.342364	1.3461	5ssIntronicRegion	Inclusion	shuffle.gc	early
TATTCA	3.28944	1.68245	2.26852	5ssIntronicRegion	Inclusion	kcl.gc	early	0.0963452	0.1812	1.15994	5ssIntronicRegion	Inclusion	shuffle.gc	early
AACAAT	3.24534	2.24612	2.80425	5ssIntronicRegion	Inclusion	kcl.gc	early	1.49008	0.885239	1.90958	5ssIntronicRegion	Inclusion	shuffle.gc	early
TTTTAT	3.21037	1.97708	1.96028	5ssIntronicRegion	Inclusion	kcl.gc	early	1.78292	0.915263	1.58752	5ssIntronicRegion	Inclusion	shuffle.gc	early
AAAGCG	3.18261	1.78981	4.66071	5ssIntronicRegion	Inclusion	kcl.gc	early	-1.77688	0.414076	0	5ssIntronicRegion	Inclusion	shuffle.gc	early
TGATTC	3.11767	2.16065	3.36184	5ssIntronicRegion	Inclusion	kcl.gc	early	-0.0177321	0.0983627	1.10807	5ssIntronicRegion	Inclusion	shuffle.gc	early
AGCATC	3.09879	1.32906	2.09807	5ssIntronicRegion	Inclusion	kcl.gc	early	-0.473637	0	0.930443	5ssIntronicRegion	Inclusion	shuffle.gc	early
TTTTAG	3.09842	1.94291	2.22467	5ssIntronicRegion	Inclusion	kcl.gc	early	-0.568736	0	0.936318	5ssIntronicRegion	Inclusion	shuffle.gc	early
TATCTG	3.083	2.00522	2.54781	5ssIntronicRegion	Inclusion	kcl.gc	early	-1.00572	0.0854562	0.786585	5ssIntronicRegion	Inclusion	shuffle.gc	early
TATTAA	3.07489	2.2376	2.49404	5ssIntronicRegion	Inclusion	kcl.gc	early	2.59003	0.94432	1.8759	5ssIntronicRegion	Inclusion	shuffle.gc	early
TGGTTT	3.05769	1.50248	1.88766	5ssIntronicRegion	Inclusion	kcl.gc	early	-0.177646	0	1.02613	5ssIntronicRegion	Inclusion	shuffle.gc	early
TATGAT	3.01953	2.13257	3.07273	5ssIntronicRegion	Inclusion	kcl.gc	early	0.297381	0.233065	1.29512	5ssIntronicRegion	Inclusion	shuffle.gc	early
ATTACT	3.01953	1.56691	2.72907	5ssIntronicRegion	Inclusion	kcl.gc	early	0.620444	0.374633	1.50997	5ssIntronicRegion	Inclusion	shuffle.gc	early
TAACGC	3.00854	1.60338	5.17531	5ssIntronicRegion	Inclusion	kcl.gc	early	0.579148	0.528591	2.15686	5ssIntronicRegion	Inclusion	shuffle.gc	early
TTCCGA	3.00854	1.60338	5.17531	5ssIntronicRegion	Inclusion	kcl.gc	early	-0.765394	0	0.706718	5ssIntronicRegion	Inclusion	shuffle.gc	early
AAACGT	3.00854	1.60338	5.17531	5ssIntronicRegion	Inclusion	kcl.gc	early	-0.452924	0	1.06589	5ssIntronicRegion	Inclusion	shuffle.gc	early
TAAGAA	3.00782	1.53639	1.99842	5ssIntronicRegion	Inclusion	kcl.gc	early	1.67633	0.801492	1.60156	5ssIntronicRegion	Inclusion	shuffle.gc	early
CTGATT	2.9873	1.31943	2.02218	5ssIntronicRegion	Inclusion	kcl.gc	early	0.241808	0	0.926042	5ssIntronicRegion	Inclusion	shuffle.gc	early
ATCAAG	2.9491	1.93482	3.01382	5ssIntronicRegion	Inclusion	kcl.gc	early	-1.76926	0.803483	0.23703	5ssIntronicRegion	Inclusion	shuffle.gc	early
ACTGAG	2.93003	1.73836	2.11161	5ssIntronicRegion	Inclusion	kcl.gc	early	-0.228318	0	0.932009	5ssIntronicRegion	Inclusion	shuffle.gc	early
GCGCCG	2.90652	1.42588	6.41463	5ssIntronicRegion	Inclusion	kcl.gc	early	0.579148	0.615755	2.59294	5ssIntronicRegion	Inclusion	shuffle.gc	early
ACCGTA	2.90652	1.42588	6.41463	5ssIntronicRegion	Inclusion	kcl.gc	early	-0.452924	0	1.06589	5ssIntronicRegion	Inclusion	shuffle.gc	early
CCGACA	2.90652	1.42588	6.41463	5ssIntronicRegion	Inclusion	kcl.gc	early	-1.485	0	0	5ssIntronicRegion	Inclusion	shuffle.gc	early
GTCCGC	2.90652	1.42588	6.41463	5ssIntronicRegion	Inclusion	kcl.gc	early	-0.319245	0.23394	1.2814	5ssIntronicRegion	Inclusion	shuffle.gc	early
CATAAA	2.89988	1.63223	2.39323	5ssIntronicRegion	Inclusion	kcl.gc	early	-0.473637	0	0.906526	5ssIntronicRegion	Inclusion	shuffle.gc	early
TGCAAA	2.89988	1.44999	2.3087	5ssIntronicRegion	Inclusion	kcl.gc	early	0.422527	0.0798108	1.0439	5ssIntronicRegion	Inclusion	shuffle.gc	early
AGAATA	2.89988	1.59441	2.32016	5ssIntronicRegion	Inclusion	kcl.gc	early	-0.593085	0.0855136	0.831194	5ssIntronicRegion	Inclusion	shuffle.gc	early
ATTCAA	2.87413	1.52053	2.60526	5ssIntronicRegion	Inclusion	kcl.gc	early	0.220252	0.207673	1.25448	5ssIntronicRegion	Inclusion	shuffle.gc	early
TATTAC	2.87413	1.56691	2.72907	5ssIntronicRegion	Inclusion	kcl.gc	early	-0.89886	0.104071	0.673469	5ssIntronicRegion	Inclusion	shuffle.gc	early
TGTTTT	2.87241	1.39304	1.69247	5ssIntronicRegion	Inclusion	kcl.gc	early	-1.01475	0.0500267	0.934283	5ssIntronicRegion	Inclusion	shuffle.gc	early
GCGTTT	2.83534	1.62838	4.07031	5ssIntronicRegion	Inclusion	kcl.gc	early	-1.32447	0.308296	0.368673	5ssIntronicRegion	Inclusion	shuffle.gc	early
TTTAAA	2.82234	1.44237	1.73322	5ssIntronicRegion	Inclusion	kcl.gc	early	0.047585	0.053176	0.934794	5ssIntronicRegion	Inclusion	shuffle.gc	early
TTTCTT	2.79339	1.47982	1.74413	5ssIntronicRegion	Inclusion	kcl.gc	early	-0.388856	0.465718	1.28684	5ssIntronicRegion	Inclusion	shuffle.gc	early
AGTTTT	2.75589	2.01273	2.11386	5ssIntronicRegion	Inclusion	kcl.gc	early	0.46607	0.0629466	1.05863	5ssIntronicRegion	Inclusion	shuffle.gc	early
GAATCC	2.7359	1.71568	2.688	5ssIntronicRegion	Inclusion	kcl.gc	early	-0.89886	0.104071	0.673469	5ssIntronicRegion	Inclusion	shuffle.gc	early
CAAATG	2.70378	1.3423	1.99021	5ssIntronicRegion	Inclusion	kcl.gc	early	-0.146706	0.081474	1.07083	5ssIntronicRegion	Inclusion	shuffle.gc	early
TTTACT	2.70378	2.04934	2.42193	5ssIntronicRegion	Inclusion	kcl.gc	early	0.0882145	0.152596	1.15955	5ssIntronicRegion	Inclusion	shuffle.gc	early
ACTCTC	2.6917	1.98226	2.64074	5ssIntronicRegion	Inclusion	kcl.gc	early	-0.303415	0.0895979	1.10265	5ssIntronicRegion	Inclusion	shuffle.gc	early
GGTTGG	2.6917	1.47936	2.38797	5ssIntronicRegion	Inclusion	kcl.gc	early	0.160921	0.0876633	1.06996	5ssIntronicRegion	Inclusion	shuffle.gc	early
GATCCA	2.64094	1.6038	2.86466	5ssIntronicRegion	Inclusion	kcl.gc	early	0.384263	0.245347	1.41304	5ssIntronicRegion	Inclusion	shuffle.gc	early
TGGAAT	2.63444	1.99351	2.43478	5ssIntronicRegion	Inclusion	kcl.gc	early	-0.616446	0	0.904159	5ssIntronicRegion	Inclusion	shuffle.gc	early
AAGTAA	2.61512	1.37909	2.0407	5ssIntronicRegion	Inclusion	kcl.gc	early	1.38437	0.381943	1.40647	5ssIntronicRegion	Inclusion	shuffle.gc	early
ATCTAA	2.60416	1.35017	2.29099	5ssIntronicRegion	Inclusion	kcl.gc	early	1.41639	0.599324	1.79798	5ssIntronicRegion	Inclusion	shuffle.gc	early
TCTTTT	2.60323	2.15089	2.09322	5ssIntronicRegion	Inclusion	kcl.gc	early	-1.23586	0.188301	0.810947	5ssIntronicRegion	Inclusion	shuffle.gc	early
TCCGAG	2.58277	1.42929	4.30453	5ssIntronicRegion	Inclusion	kcl.gc	early	0.0772972	0.186695	1.43007	5ssIntronicRegion	Inclusion	shuffle.gc	early
CATTTA	2.57802	1.40753	1.96566	5ssIntronicRegion	Inclusion	kcl.gc	early	-1.05897	0.38633	0.617073	5ssIntronicRegion	Inclusion	shuffle.gc	early
AAAACA	2.56137	1.73836	2.11161	5ssIntronicRegion	Inclusion	kcl.gc	early	0.807131	0.888608	1.66726	5ssIntronicRegion	Inclusion	shuffle.gc	early
TGAAGC	2.55235	1.43671	2.0084	5ssIntronicRegion	Inclusion	kcl.gc	early	-1.54603	0.540223	0.51004	5ssIntronicRegion	Inclusion	shuffle.gc	early
TATTTT	2.5364	1.32087	1.69803	5ssIntronicRegion	Inclusion	kcl.gc	early	0.58968	0.747791	1.44855	5ssIntronicRegion	Inclusion	shuffle.gc	early
TTTTCT	2.52368	2.24329	1.98496	5ssIntronicRegion	Inclusion	kcl.gc	early	-2.00549	0.353881	0.801496	5ssIntronicRegion	Inclusion	shuffle.gc	early
ATCATA	2.49931	1.6038	2.86466	5ssIntronicRegion	Inclusion	kcl.gc	early	1.52934	0.580128	1.71659	5ssIntronicRegion	Inclusion	shuffle.gc	early
TAGTAA	2.47833	1.65952	2.57949	5ssIntronicRegion	Inclusion	kcl.gc	early	-2.01442	0.796733	0.219269	5ssIntronicRegion	Inclusion	shuffle.gc	early
GTAGCC	2.47833	1.35017	2.29099	5ssIntronicRegion	Inclusion	kcl.gc	early	-1.5027	0.599165	0.473443	5ssIntronicRegion	Inclusion	shuffle.gc	early
GAATCA	2.47305	1.78951	2.56291	5ssIntronicRegion	Inclusion	kcl.gc	early	1.71941	1.19363	2.05824	5ssIntronicRegion	Inclusion	shuffle.gc	early
TTATAA	2.45947	1.43671	2.0084	5ssIntronicRegion	Inclusion	kcl.gc	early	1.60413	0.91884	1.73953	5ssIntronicRegion	Inclusion	shuffle.gc	early
AAATAT	2.45947	1.34329	1.92016	5ssIntronicRegion	Inclusion	kcl.gc	early	0.103224	0.240041	1.24274	5ssIntronicRegion	Inclusion	shuffle.gc	early
TGTATA	2.4262	1.48155	2.09913	5ssIntronicRegion	Inclusion	kcl.gc	early	0.538073	0.684119	1.58936	5ssIntronicRegion	Inclusion	shuffle.gc	early
TCTTGT	2.39621	1.60918	1.98721	5ssIntronicRegion	Inclusion	kcl.gc	early	1.49012	0.678507	1.52806	5ssIntronicRegion	Inclusion	shuffle.gc	early
TTGCAT	2.39361	1.46165	2.05286	5ssIntronicRegion	Inclusion	kcl.gc	early	0.645686	0.476785	1.40283	5ssIntronicRegion	Inclusion	shuffle.gc	early
TTTTCC	2.37755	1.41753	1.86907	5ssIntronicRegion	Inclusion	kcl.gc	early	-0.328104	0.0576252	0.921804	5ssIntronicRegion	Inclusion	shuffle.gc	early
TCAAAT	2.37668	1.63223	2.39323	5ssIntronicRegion	Inclusion	kcl.gc	early	-1.05267	0.420239	0.560789	5ssIntronicRegion	Inclusion	shuffle.gc	early
CTATCT	2.36487	1.46738	2.49178	5ssIntronicRegion	Inclusion	kcl.gc	early	-1.61243	0.525356	0.385294	5ssIntronicRegion	Inclusion	shuffle.gc	early
CCAAAT	2.36324	1.44999	2.3087	5ssIntronicRegion	Inclusion	kcl.gc	early	1.39071	0.85401	1.84024	5ssIntronicRegion	Inclusion	shuffle.gc	early
TAAGTA	2.36201	1.75834	2.25	5ssIntronicRegion	Inclusion	kcl.gc	early	0.478011	0.159004	1.14253	5ssIntronicRegion	Inclusion	shuffle.gc	early
TTGTAT	2.36201	1.7894	2.30476	5ssIntronicRegion	Inclusion	kcl.gc	early	1.24616	0.656696	1.60469	5ssIntronicRegion	Inclusion	shuffle.gc	early
GATTTG	2.30369	1.50399	2.18586	5ssIntronicRegion	Inclusion	kcl.gc	early	-1.82863	0.733421	0.405556	5ssIntronicRegion	Inclusion	shuffle.gc	early
CCGAGG	2.28249	1.48577	3.61111	5ssIntronicRegion	Inclusion	kcl.gc	early	-1.20572	0.151086	0.450166	5ssIntronicRegion	Inclusion	shuffle.gc	early
CTTCGC	2.28249	1.35878	3.24375	5ssIntronicRegion	Inclusion	kcl.gc	early	1.35587	0.878974	2.38773	5ssIntronicRegion	Inclusion	shuffle.gc	early
GAGTTT	2.28035	1.53639	1.99842	5ssIntronicRegion	Inclusion	kcl.gc	early	0.538073	0.377656	1.37446	5ssIntronicRegion	Inclusion	shuffle.gc	early
AATCTC	2.28023	1.5402	2.8774	5ssIntronicRegion	Inclusion	kcl.gc	early	-0.551251	0	0.908778	5ssIntronicRegion	Inclusion	shuffle.gc	early
AATATG	2.27844	1.44999	2.3087	5ssIntronicRegion	Inclusion	kcl.gc	early	-0.593085	0	0.880759	5ssIntronicRegion	Inclusion	shuffle.gc	early
AAACTC	2.27844	1.55116	2.25114	5ssIntronicRegion	Inclusion	kcl.gc	early	2.40252	1.24564	2.00976	5ssIntronicRegion	Inclusion	shuffle.gc	early
ATAGAA	2.27844	1.59441	2.32016	5ssIntronicRegion	Inclusion	kcl.gc	early	-0.593085	0	0.855307	5ssIntronicRegion	Inclusion	shuffle.gc	early
ACTTAA	2.25738	1.53544	2.38571	5ssIntronicRegion	Inclusion	kcl.gc	early	0.823091	0.459717	1.55473	5ssIntronicRegion	Inclusion	shuffle.gc	early
AAGCAC	2.25738	1.44999	2.3087	5ssIntronicRegion	Inclusion	kcl.gc	early	-0.683871	0.0793365	0.821256	5ssIntronicRegion	Inclusion	shuffle.gc	early
GTTTTA	2.25081	1.49991	1.99153	5ssIntronicRegion	Inclusion	kcl.gc	early	1.67133	1.15661	1.78879	5ssIntronicRegion	Inclusion	shuffle.gc	early
TTCAAC	2.24248	1.65952	2.57949	5ssIntronicRegion	Inclusion	kcl.gc	early	-1.65639	0.680736	0.372906	5ssIntronicRegion	Inclusion	shuffle.gc	early
TTAGGC	2.23692	1.52053	2.60526	5ssIntronicRegion	Inclusion	kcl.gc	early	-1.06743	0.218566	0.649015	5ssIntronicRegion	Inclusion	shuffle.gc	early
TACTGC	2.23692	1.56691	2.72907	5ssIntronicRegion	Inclusion	kcl.gc	early	0.921227	0.354525	1.39683	5ssIntronicRegion	Inclusion	shuffle.gc	early
AACTGA	2.21425	1.44088	2.14905	5ssIntronicRegion	Inclusion	kcl.gc	early	-0.060416	0.0784136	1.12273	5ssIntronicRegion	Inclusion	shuffle.gc	early
CTATTT	2.16791	1.43671	2.0084	5ssIntronicRegion	Inclusion	kcl.gc	early	0.00500029	0.148438	1.11509	5ssIntronicRegion	Inclusion	shuffle.gc	early
TACTCC	2.1673	1.34217	2.79385	5ssIntronicRegion	Inclusion	kcl.gc	early	-0.839218	0.104938	0.699735	5ssIntronicRegion	Inclusion	shuffle.gc	early
GCTCGG	2.1673	1.56161	3.27215	5ssIntronicRegion	Inclusion	kcl.gc	early	-2.08868	1.03219	0	5ssIntronicRegion	Inclusion	shuffle.gc	early
ATCAGC	2.15519	1.72299	2.47252	5ssIntronicRegion	Inclusion	kcl.gc	early	-0.898842	0.0938029	0.789157	5ssIntronicRegion	Inclusion	shuffle.gc	early
CTTCAA	2.15519	1.37338	2.16415	5ssIntronicRegion	Inclusion	kcl.gc	early	-0.303415	0	0.955556	5ssIntronicRegion	Inclusion	shuffle.gc	early
GTTTAA	2.12722	1.4638	2.20729	5ssIntronicRegion	Inclusion	kcl.gc	early	0.766441	0.621441	1.49758	5ssIntronicRegion	Inclusion	shuffle.gc	early
TCAATG	2.11487	1.40992	2.38737	5ssIntronicRegion	Inclusion	kcl.gc	early	-1.43434	0.300011	0.328641	5ssIntronicRegion	Inclusion	shuffle.gc	early
AATATC	2.10903	1.37014	2.64416	5ssIntronicRegion	Inclusion	kcl.gc	early	1.46564	0.920685	2.21399	5ssIntronicRegion	Inclusion	shuffle.gc	early
GAATAG	2.10903	1.3266	2.5133	5ssIntronicRegion	Inclusion	kcl.gc	early	-0.839218	0.105192	0.728022	5ssIntronicRegion	Inclusion	shuffle.gc	early
TTTTAA	2.0975	1.40621	1.71097	5ssIntronicRegion	Inclusion	kcl.gc	early	0.862651	0.497292	1.30484	5ssIntronicRegion	Inclusion	shuffle.gc	early
TAAAAA	2.08613	1.41377	1.9178	5ssIntronicRegion	Inclusion	kcl.gc	early	0.650046	0.507769	1.40046	5ssIntronicRegion	Inclusion	shuffle.gc	early
GGACTT	2.08421	1.50939	2.07042	5ssIntronicRegion	Inclusion	kcl.gc	early	1.45763	0.94432	1.8759	5ssIntronicRegion	Inclusion	shuffle.gc	early
TTTGCA	2.07176	1.32122	1.88306	5ssIntronicRegion	Inclusion	kcl.gc	early	-0.568736	0.147301	0.80686	5ssIntronicRegion	Inclusion	shuffle.gc	early
AAGTTA	2.05642	1.47936	2.38797	5ssIntronicRegion	Inclusion	kcl.gc	early	-1.78295	0.832915	0.339869	5ssIntronicRegion	Inclusion	shuffle.gc	early
AATGTT	2.05088	1.75834	2.25	5ssIntronicRegion	Inclusion	kcl.gc	early	-0.37711	0	0.8855	5ssIntronicRegion	Inclusion	shuffle.gc	early
AAAATA	2.01829	1.31027	1.79826	5ssIntronicRegion	Inclusion	kcl.gc	early	0.33421	0	0.980513	5ssIntronicRegion	Inclusion	shuffle.gc	early
CTTTTT	2.01807	1.3595	1.7233	5ssIntronicRegion	Inclusion	kcl.gc	early	0.365271	0.432082	1.30582	5ssIntronicRegion	Inclusion	shuffle.gc	early
TTAAAA	2.00528	1.77556	1.95341	5ssIntronicRegion	Inclusion	kcl.gc	early	0.751597	0.655844	1.42776	5ssIntronicRegion	Inclusion	shuffle.gc	early
AGTGAT	1.88643	1.46738	2.49178	5ssIntronicRegion	Inclusion	kcl.gc	early	-0.613342	0	0.875779	5ssIntronicRegion	Inclusion	shuffle.gc	early
CTTTTC	1.85245	1.358	1.76318	5ssIntronicRegion	Inclusion	kcl.gc	early	-1.47906	0.525927	0.671402	5ssIntronicRegion	Inclusion	shuffle.gc	early
AATAAT	1.81062	1.75834	2.25	5ssIntronicRegion	Inclusion	kcl.gc	early	-0.315071	0.0798108	1.0439	5ssIntronicRegion	Inclusion	shuffle.gc	early
AAGAAA	1.79924	1.43635	1.83401	5ssIntronicRegion	Inclusion	kcl.gc	early	1.73284	1.24996	1.75051	5ssIntronicRegion	Inclusion	shuffle.gc	early
TTTAAG	1.50105	1.40753	1.96566	5ssIntronicRegion	Inclusion	kcl.gc	early	0.843037	0.216505	1.20004	5ssIntronicRegion	Inclusion	shuffle.gc	early
CATTTT	1.4308	1.44995	1.78554	5ssIntronicRegion	Inclusion	kcl.gc	early	1.09213	0.268911	1.22484	5ssIntronicRegion	Inclusion	shuffle.gc	early
ATTTTT	1.17336	1.51646	1.82261	5ssIntronicRegion	Inclusion	kcl.gc	early	0.80442	0.114732	1.08095	5ssIntronicRegion	Inclusion	shuffle.gc	early
GCCTAA	7.38208	4.93973	6.80202	5ssIntronicRegion	Inclusion	kcl.gc	late	-1.55555	0.548343	0.392045	5ssIntronicRegion	Inclusion	shuffle.gc	late
TCAATA	5.79985	2.9072	3.62471	5ssIntronicRegion	Inclusion	kcl.gc	late	-0.0181891	0	0.983539	5ssIntronicRegion	Inclusion	shuffle.gc	late
AACGTT	5.20745	2.36637	5.33805	5ssIntronicRegion	Inclusion	kcl.gc	late	0.984324	0.190919	1.48512	5ssIntronicRegion	Inclusion	shuffle.gc	late
TAACGT	4.98678	2.62951	6.41887	5ssIntronicRegion	Inclusion	kcl.gc	late	2.32278	1.28722	3.26343	5ssIntronicRegion	Inclusion	shuffle.gc	late
TAGGAA	4.79411	2.88092	3.01851	5ssIntronicRegion	Inclusion	kcl.gc	late	-0.641059	0	0.906267	5ssIntronicRegion	Inclusion	shuffle.gc	late
CAACGT	4.77297	2.38139	6.8271	5ssIntronicRegion	Inclusion	kcl.gc	late	0.999808	0.637845	2.9881	5ssIntronicRegion	Inclusion	shuffle.gc	late
TTAAAA	4.73887	1.69015	1.76532	5ssIntronicRegion	Inclusion	kcl.gc	late	-0.0767689	0.273826	1.18285	5ssIntronicRegion	Inclusion	shuffle.gc	late
ATGCGG	4.73153	1.6554	13.3636	5ssIntronicRegion	Inclusion	kcl.gc	late	0.999808	0.637845	2.9881	5ssIntronicRegion	Inclusion	shuffle.gc	late
CCGCTA	4.73153	1.6554	13.3636	5ssIntronicRegion	Inclusion	kcl.gc	late	2.68196	1.05159	9	5ssIntronicRegion	Inclusion	shuffle.gc	late
TAAGAA	4.71538	2.35366	2.33875	5ssIntronicRegion	Inclusion	kcl.gc	late	1.38995	0.623335	1.48571	5ssIntronicRegion	Inclusion	shuffle.gc	late
GTAACG	4.58481	2.13462	7.53086	5ssIntronicRegion	Inclusion	kcl.gc	late	0.628297	0.514812	2.23661	5ssIntronicRegion	Inclusion	shuffle.gc	late
TAAATA	4.58287	1.76398	1.93001	5ssIntronicRegion	Inclusion	kcl.gc	late	-0.66151	0.0547365	0.911195	5ssIntronicRegion	Inclusion	shuffle.gc	late
ATATCT	4.52799	2.95291	3.04321	5ssIntronicRegion	Inclusion	kcl.gc	late	-0.152451	0.0887405	1.06667	5ssIntronicRegion	Inclusion	shuffle.gc	late
TCGATG	4.48046	1.8907	8.97248	5ssIntronicRegion	Inclusion	kcl.gc	late	-0.215362	0.253387	1.48083	5ssIntronicRegion	Inclusion	shuffle.gc	late
TAAGCT	4.43668	2.7141	3.11446	5ssIntronicRegion	Inclusion	kcl.gc	late	0.763557	0.410107	1.4069	5ssIntronicRegion	Inclusion	shuffle.gc	late
GAGATC	4.3651	2.28105	3.31275	5ssIntronicRegion	Inclusion	kcl.gc	late	1.08596	0.45879	1.51258	5ssIntronicRegion	Inclusion	shuffle.gc	late
CATTAA	4.32049	2.96488	2.89927	5ssIntronicRegion	Inclusion	kcl.gc	late	0.0359538	0.144079	1.11893	5ssIntronicRegion	Inclusion	shuffle.gc	late
AAAACA	4.2978	2.6926	2.43247	5ssIntronicRegion	Inclusion	kcl.gc	late	-2.09042	0.495979	0.647942	5ssIntronicRegion	Inclusion	shuffle.gc	late
TGGTAA	4.25557	2.82125	2.91158	5ssIntronicRegion	Inclusion	kcl.gc	late	0.568932	0.373075	1.33201	5ssIntronicRegion	Inclusion	shuffle.gc	late
TAAAAT	4.2063	1.70775	1.82799	5ssIntronicRegion	Inclusion	kcl.gc	late	-0.557804	0.169582	0.853872	5ssIntronicRegion	Inclusion	shuffle.gc	late
GATCCA	4.10643	2.28105	3.31275	5ssIntronicRegion	Inclusion	kcl.gc	late	-1.51987	0.480843	0.497921	5ssIntronicRegion	Inclusion	shuffle.gc	late
AAACAA	4.08447	1.77164	1.99793	5ssIntronicRegion	Inclusion	kcl.gc	late	-1.94387	0.129852	0.823067	5ssIntronicRegion	Inclusion	shuffle.gc	late
TAACTA	4.03288	2.60471	2.82112	5ssIntronicRegion	Inclusion	kcl.gc	late	1.99214	0.940398	1.78305	5ssIntronicRegion	Inclusion	shuffle.gc	late
AAATAA	3.90695	1.37793	1.76721	5ssIntronicRegion	Inclusion	kcl.gc	late	-0.900836	0.246836	0.793116	5ssIntronicRegion	Inclusion	shuffle.gc	late
AATCTC	3.81981	2.09076	2.75168	5ssIntronicRegion	Inclusion	kcl.gc	late	-1.3926	0.510848	0.580213	5ssIntronicRegion	Inclusion	shuffle.gc	late
AACAAC	3.81981	1.88713	2.64522	5ssIntronicRegion	Inclusion	kcl.gc	late	-1.91767	0.857538	0.316138	5ssIntronicRegion	Inclusion	shuffle.gc	late
CAATAT	3.81981	1.68566	2.53285	5ssIntronicRegion	Inclusion	kcl.gc	late	-1.19081	0.200513	0.66993	5ssIntronicRegion	Inclusion	shuffle.gc	late
GAAATT	3.80689	2.56849	2.57364	5ssIntronicRegion	Inclusion	kcl.gc	late	0.489357	0.352436	1.31247	5ssIntronicRegion	Inclusion	shuffle.gc	late
AAAACG	3.77217	1.93714	3.98703	5ssIntronicRegion	Inclusion	kcl.gc	late	-1.19335	0.124413	0.583333	5ssIntronicRegion	Inclusion	shuffle.gc	late
CCGGGA	3.77217	1.75939	3.53669	5ssIntronicRegion	Inclusion	kcl.gc	late	-0.126935	0.12739	1.11036	5ssIntronicRegion	Inclusion	shuffle.gc	late
TTACAA	3.74976	2.25805	2.90952	5ssIntronicRegion	Inclusion	kcl.gc	late	0.372684	0.179835	1.23878	5ssIntronicRegion	Inclusion	shuffle.gc	late
ATAAGA	3.72559	1.9705	2.52914	5ssIntronicRegion	Inclusion	kcl.gc	late	1.01972	0.389606	1.42127	5ssIntronicRegion	Inclusion	shuffle.gc	late
CATTGT	3.68921	2.48508	2.44022	5ssIntronicRegion	Inclusion	kcl.gc	late	-1.11152	0.222381	0.763025	5ssIntronicRegion	Inclusion	shuffle.gc	late
AATAAT	3.68921	2.55127	2.63343	5ssIntronicRegion	Inclusion	kcl.gc	late	-0.132618	0.136009	0.837648	5ssIntronicRegion	Inclusion	shuffle.gc	late
TATCAT	3.6467	2.60579	2.97832	5ssIntronicRegion	Inclusion	kcl.gc	late	-0.987114	0.169643	0.769608	5ssIntronicRegion	Inclusion	shuffle.gc	late
TTTGAT	3.64044	2.82871	2.53284	5ssIntronicRegion	Inclusion	kcl.gc	late	0.804091	0.296219	1.21962	5ssIntronicRegion	Inclusion	shuffle.gc	late
ATTGTA	3.63713	2.03343	2.39474	5ssIntronicRegion	Inclusion	kcl.gc	late	-0.0664271	0	0.996429	5ssIntronicRegion	Inclusion	shuffle.gc	late
CAATAA	3.61508	1.59645	2.55124	5ssIntronicRegion	Inclusion	kcl.gc	late	0.164041	0	1.0235	5ssIntronicRegion	Inclusion	shuffle.gc	late
GTGAAC	3.61508	2.28105	3.31275	5ssIntronicRegion	Inclusion	kcl.gc	late	-1.8614	0.859828	0.328984	5ssIntronicRegion	Inclusion	shuffle.gc	late
GGAAAT	3.61027	1.39328	1.80949	5ssIntronicRegion	Inclusion	kcl.gc	late	-1.51756	0.497103	0.660591	5ssIntronicRegion	Inclusion	shuffle.gc	late
TTATAA	3.59347	1.39328	1.80949	5ssIntronicRegion	Inclusion	kcl.gc	late	0.540098	0.127183	1.10035	5ssIntronicRegion	Inclusion	shuffle.gc	late
CTTTAC	3.5678	2.10158	2.53098	5ssIntronicRegion	Inclusion	kcl.gc	late	-0.219875	0	0.983229	5ssIntronicRegion	Inclusion	shuffle.gc	late
ACAATA	3.55307	2.06054	3.20159	5ssIntronicRegion	Inclusion	kcl.gc	late	-0.110509	0	1.05723	5ssIntronicRegion	Inclusion	shuffle.gc	late
CTGTCA	3.53601	2.4997	2.35856	5ssIntronicRegion	Inclusion	kcl.gc	late	-0.611925	0	0.962567	5ssIntronicRegion	Inclusion	shuffle.gc	late
ACGTCT	3.50543	1.88069	4.53271	5ssIntronicRegion	Inclusion	kcl.gc	late	-0.734538	0	0.733631	5ssIntronicRegion	Inclusion	shuffle.gc	late
CAATAG	3.49768	2.17358	3.30791	5ssIntronicRegion	Inclusion	kcl.gc	late	1.87864	1.06949	2.29439	5ssIntronicRegion	Inclusion	shuffle.gc	late
TAAAAA	3.45998	2.55667	2.21058	5ssIntronicRegion	Inclusion	kcl.gc	late	0.822712	0.171985	1.13032	5ssIntronicRegion	Inclusion	shuffle.gc	late
TTCGTT	3.43359	1.93714	3.98703	5ssIntronicRegion	Inclusion	kcl.gc	late	0.161455	0.145267	1.33784	5ssIntronicRegion	Inclusion	shuffle.gc	late
TTTCCA	3.41605	1.99436	2.04072	5ssIntronicRegion	Inclusion	kcl.gc	late	0.212648	0	1.01458	5ssIntronicRegion	Inclusion	shuffle.gc	late
ACCTAG	3.40861	1.8135	2.67905	5ssIntronicRegion	Inclusion	kcl.gc	late	1.08596	0.307194	1.39042	5ssIntronicRegion	Inclusion	shuffle.gc	late
GAGATA	3.40861	1.90743	2.83388	5ssIntronicRegion	Inclusion	kcl.gc	late	-1.25366	0.223348	0.593366	5ssIntronicRegion	Inclusion	shuffle.gc	late
ACACTA	3.40861	2.21539	3.12211	5ssIntronicRegion	Inclusion	kcl.gc	late	0.469078	0.300485	1.33613	5ssIntronicRegion	Inclusion	shuffle.gc	late
GATATA	3.39428	2.58303	3.16498	5ssIntronicRegion	Inclusion	kcl.gc	late	1.04828	0.581628	1.57912	5ssIntronicRegion	Inclusion	shuffle.gc	late
ATATAA	3.39334	1.77524	2.17286	5ssIntronicRegion	Inclusion	kcl.gc	late	-1.92501	0.890112	0.468909	5ssIntronicRegion	Inclusion	shuffle.gc	late
TAATTG	3.32439	2.17893	2.63039	5ssIntronicRegion	Inclusion	kcl.gc	late	-0.0267092	0.161981	1.15102	5ssIntronicRegion	Inclusion	shuffle.gc	late
TAGTCA	3.30531	2.15378	2.77136	5ssIntronicRegion	Inclusion	kcl.gc	late	0.102789	0.0794971	1.11557	5ssIntronicRegion	Inclusion	shuffle.gc	late
ACTCTC	3.30531	1.68566	2.53285	5ssIntronicRegion	Inclusion	kcl.gc	late	1.26466	0.581628	1.57912	5ssIntronicRegion	Inclusion	shuffle.gc	late
TAACTT	3.27678	2.1893	2.40957	5ssIntronicRegion	Inclusion	kcl.gc	late	-0.712582	0.0650007	0.894819	5ssIntronicRegion	Inclusion	shuffle.gc	late
TTAAGA	3.26043	2.28899	2.36035	5ssIntronicRegion	Inclusion	kcl.gc	late	0.290975	0.0664969	1.06564	5ssIntronicRegion	Inclusion	shuffle.gc	late
GTCAAG	3.25522	1.84058	3.08091	5ssIntronicRegion	Inclusion	kcl.gc	late	-1.8614	0.857538	0.316138	5ssIntronicRegion	Inclusion	shuffle.gc	late
TGTTAT	3.20179	1.49862	2.1243	5ssIntronicRegion	Inclusion	kcl.gc	late	-0.0696565	0.0650007	0.894819	5ssIntronicRegion	Inclusion	shuffle.gc	late
TGTCAA	3.17383	1.9705	2.52914	5ssIntronicRegion	Inclusion	kcl.gc	late	0.213129	0.278907	1.3106	5ssIntronicRegion	Inclusion	shuffle.gc	late
ATAAAT	3.1469	1.90469	2.02586	5ssIntronicRegion	Inclusion	kcl.gc	late	0.868076	0.197834	1.14535	5ssIntronicRegion	Inclusion	shuffle.gc	late
AATAGC	3.12373	1.68716	2.70702	5ssIntronicRegion	Inclusion	kcl.gc	late	-0.303751	0	1.05723	5ssIntronicRegion	Inclusion	shuffle.gc	late
CCATTA	3.12373	1.90743	2.83388	5ssIntronicRegion	Inclusion	kcl.gc	late	-0.104637	0.0828785	1.0738	5ssIntronicRegion	Inclusion	shuffle.gc	late
ATAATC	3.12373	1.90743	2.83388	5ssIntronicRegion	Inclusion	kcl.gc	late	-0.565255	0	0.880734	5ssIntronicRegion	Inclusion	shuffle.gc	late
CGGGAA	3.07731	1.35919	3.00312	5ssIntronicRegion	Inclusion	kcl.gc	late	-0.504136	0	0.883929	5ssIntronicRegion	Inclusion	shuffle.gc	late
AGTAAA	3.06371	2.42043	2.48016	5ssIntronicRegion	Inclusion	kcl.gc	late	0.908747	0.623847	1.57983	5ssIntronicRegion	Inclusion	shuffle.gc	late
TATCAA	3.03287	2.03417	2.79802	5ssIntronicRegion	Inclusion	kcl.gc	late	-0.658032	0.223348	0.593366	5ssIntronicRegion	Inclusion	shuffle.gc	late
GGTAAT	3.03192	1.77083	2.88228	5ssIntronicRegion	Inclusion	kcl.gc	late	0.584721	0.361827	1.42105	5ssIntronicRegion	Inclusion	shuffle.gc	late
TCAAGT	3.02955	1.38485	2.07103	5ssIntronicRegion	Inclusion	kcl.gc	late	-1.29313	0.366768	0.645833	5ssIntronicRegion	Inclusion	shuffle.gc	late
TCAACG	3.00648	1.32094	6.66818	5ssIntronicRegion	Inclusion	kcl.gc	late	-0.215362	0.253387	1.48083	5ssIntronicRegion	Inclusion	shuffle.gc	late
GATACG	3.00648	1.32094	6.66818	5ssIntronicRegion	Inclusion	kcl.gc	late	-1.41606	0	0	5ssIntronicRegion	Inclusion	shuffle.gc	late
CGATTA	3.00648	1.32094	6.66818	5ssIntronicRegion	Inclusion	kcl.gc	late	-0.215362	0.253387	1.48083	5ssIntronicRegion	Inclusion	shuffle.gc	late
ATACGT	3.00648	1.32094	6.66818	5ssIntronicRegion	Inclusion	kcl.gc	late	-0.734202	0	0.735988	5ssIntronicRegion	Inclusion	shuffle.gc	late
TGACGA	3.00648	1.32094	6.66818	5ssIntronicRegion	Inclusion	kcl.gc	late	1.56047	0.805622	4.49107	5ssIntronicRegion	Inclusion	shuffle.gc	late
GCATTG	2.99816	2.31254	2.6278	5ssIntronicRegion	Inclusion	kcl.gc	late	-0.318699	0.0715413	0.854119	5ssIntronicRegion	Inclusion	shuffle.gc	late
AAACAC	2.99816	1.52481	2.19547	5ssIntronicRegion	Inclusion	kcl.gc	late	-1.50761	0.632542	0.533257	5ssIntronicRegion	Inclusion	shuffle.gc	late
CTCATA	2.96875	1.36876	2.19437	5ssIntronicRegion	Inclusion	kcl.gc	late	0.781518	0.194596	1.25607	5ssIntronicRegion	Inclusion	shuffle.gc	late
GATCTG	2.96875	1.36876	2.19437	5ssIntronicRegion	Inclusion	kcl.gc	late	1.49876	0.744725	1.77145	5ssIntronicRegion	Inclusion	shuffle.gc	late
TCCAGT	2.95119	1.53499	2.05235	5ssIntronicRegion	Inclusion	kcl.gc	late	1.85964	0.699114	1.58439	5ssIntronicRegion	Inclusion	shuffle.gc	late
GTAAAA	2.95119	1.96001	2.25873	5ssIntronicRegion	Inclusion	kcl.gc	late	1.19446	0.553721	1.41891	5ssIntronicRegion	Inclusion	shuffle.gc	late
TTAACT	2.94613	2.22851	2.29903	5ssIntronicRegion	Inclusion	kcl.gc	late	-0.0696565	0.0649496	0.875	5ssIntronicRegion	Inclusion	shuffle.gc	late
ATCAAT	2.93036	1.59645	2.55124	5ssIntronicRegion	Inclusion	kcl.gc	late	1.55049	0.929462	2.04193	5ssIntronicRegion	Inclusion	shuffle.gc	late
AACTGC	2.89104	1.66367	2.33838	5ssIntronicRegion	Inclusion	kcl.gc	late	1.04828	0.547901	1.57825	5ssIntronicRegion	Inclusion	shuffle.gc	late
CTATCA	2.86086	1.68566	2.53285	5ssIntronicRegion	Inclusion	kcl.gc	late	-1.39086	0.344901	0.518919	5ssIntronicRegion	Inclusion	shuffle.gc	late
CTATGT	2.86086	1.72695	2.65912	5ssIntronicRegion	Inclusion	kcl.gc	late	0.866868	0.581628	1.57912	5ssIntronicRegion	Inclusion	shuffle.gc	late
CATTTA	2.85768	2.16228	2.15748	5ssIntronicRegion	Inclusion	kcl.gc	late	-0.82973	0.142269	0.835258	5ssIntronicRegion	Inclusion	shuffle.gc	late
TTTACA	2.84572	1.63892	2.14904	5ssIntronicRegion	Inclusion	kcl.gc	late	0.346324	0.146601	1.14744	5ssIntronicRegion	Inclusion	shuffle.gc	late
ATGATT	2.84572	1.41863	1.99417	5ssIntronicRegion	Inclusion	kcl.gc	late	-0.647849	0	0.898052	5ssIntronicRegion	Inclusion	shuffle.gc	late
TAAAAC	2.8417	1.87526	2.21847	5ssIntronicRegion	Inclusion	kcl.gc	late	0.361073	0	0.915465	5ssIntronicRegion	Inclusion	shuffle.gc	late
TTAATT	2.83844	1.48348	1.83574	5ssIntronicRegion	Inclusion	kcl.gc	late	0.212648	0.341764	1.22575	5ssIntronicRegion	Inclusion	shuffle.gc	late
CAAATA	2.81283	1.76564	2.4232	5ssIntronicRegion	Inclusion	kcl.gc	late	-1.92169	0.896418	0.362934	5ssIntronicRegion	Inclusion	shuffle.gc	late
ACCATT	2.81283	2.15378	2.77136	5ssIntronicRegion	Inclusion	kcl.gc	late	1.2191	0.879429	1.81935	5ssIntronicRegion	Inclusion	shuffle.gc	late
TCATAC	2.81283	1.3307	2.21465	5ssIntronicRegion	Inclusion	kcl.gc	late	0.894623	0.45879	1.51258	5ssIntronicRegion	Inclusion	shuffle.gc	late
ACTACA	2.77986	2.09076	2.75168	5ssIntronicRegion	Inclusion	kcl.gc	late	0.464966	0.337531	1.43628	5ssIntronicRegion	Inclusion	shuffle.gc	late
AGCCTA	2.77986	1.66367	2.33838	5ssIntronicRegion	Inclusion	kcl.gc	late	0.213129	0	1.01348	5ssIntronicRegion	Inclusion	shuffle.gc	late
AAACGT	2.76769	1.75939	3.53669	5ssIntronicRegion	Inclusion	kcl.gc	late	-2.1637	1.27712	0	5ssIntronicRegion	Inclusion	shuffle.gc	late
AACGTA	2.76769	1.75939	3.53669	5ssIntronicRegion	Inclusion	kcl.gc	late	-2.11197	1.06446	0	5ssIntronicRegion	Inclusion	shuffle.gc	late
CAAGAG	2.75787	1.85161	2.43842	5ssIntronicRegion	Inclusion	kcl.gc	late	-0.895157	0.149543	0.790738	5ssIntronicRegion	Inclusion	shuffle.gc	late
TCCAAG	2.7441	1.67404	2.2171	5ssIntronicRegion	Inclusion	kcl.gc	late	1.43258	0.827392	1.69094	5ssIntronicRegion	Inclusion	shuffle.gc	late
ATTTAG	2.73662	1.63892	2.14904	5ssIntronicRegion	Inclusion	kcl.gc	late	0.57168	0.476373	1.39132	5ssIntronicRegion	Inclusion	shuffle.gc	late
TTAGAG	2.73662	1.63892	2.14904	5ssIntronicRegion	Inclusion	kcl.gc	late	1.63016	0.23867	1.20862	5ssIntronicRegion	Inclusion	shuffle.gc	late
TTGATG	2.73407	1.77524	2.17286	5ssIntronicRegion	Inclusion	kcl.gc	late	0.737888	0.352436	1.31247	5ssIntronicRegion	Inclusion	shuffle.gc	late
GAGGAC	2.73407	1.36996	1.96636	5ssIntronicRegion	Inclusion	kcl.gc	late	0.234612	0.0739128	1.08417	5ssIntronicRegion	Inclusion	shuffle.gc	late
TATATC	2.71697	1.55142	2.74615	5ssIntronicRegion	Inclusion	kcl.gc	late	-0.824006	0.0961637	0.762055	5ssIntronicRegion	Inclusion	shuffle.gc	late
AACTAC	2.69795	1.36876	2.19437	5ssIntronicRegion	Inclusion	kcl.gc	late	1.49876	0.581628	1.57912	5ssIntronicRegion	Inclusion	shuffle.gc	late
AACGTG	2.69658	1.51056	3.38551	5ssIntronicRegion	Inclusion	kcl.gc	late	-0.623937	0	0.801948	5ssIntronicRegion	Inclusion	shuffle.gc	late
ACGTTA	2.68844	1.3559	4.46789	5ssIntronicRegion	Inclusion	kcl.gc	late	-0.0637996	0.171446	1.27041	5ssIntronicRegion	Inclusion	shuffle.gc	late
TATGCG	2.68844	1.3559	4.46789	5ssIntronicRegion	Inclusion	kcl.gc	late	-0.0637996	0.171446	1.27041	5ssIntronicRegion	Inclusion	shuffle.gc	late
GTCATA	2.66412	1.51069	2.325	5ssIntronicRegion	Inclusion	kcl.gc	late	-0.0632637	0.0780195	1.07947	5ssIntronicRegion	Inclusion	shuffle.gc	late
TACGGT	2.65442	1.4266	3.74228	5ssIntronicRegion	Inclusion	kcl.gc	late	0.328568	0.327841	1.48949	5ssIntronicRegion	Inclusion	shuffle.gc	late
AAATTA	2.64613	1.71613	1.98512	5ssIntronicRegion	Inclusion	kcl.gc	late	0.414863	0.200587	1.16771	5ssIntronicRegion	Inclusion	shuffle.gc	late
GTTAAG	2.64243	1.9705	2.52914	5ssIntronicRegion	Inclusion	kcl.gc	late	-0.498476	0	0.966998	5ssIntronicRegion	Inclusion	shuffle.gc	late
CAGGAT	2.62963	1.75828	2.27123	5ssIntronicRegion	Inclusion	kcl.gc	late	1.48784	0.709996	1.53795	5ssIntronicRegion	Inclusion	shuffle.gc	late
TAACTG	2.62963	1.56919	2.17306	5ssIntronicRegion	Inclusion	kcl.gc	late	-0.347921	0.0809807	0.849462	5ssIntronicRegion	Inclusion	shuffle.gc	late
TTGAGA	2.60857	1.90469	2.02586	5ssIntronicRegion	Inclusion	kcl.gc	late	0.597785	0.478763	1.33581	5ssIntronicRegion	Inclusion	shuffle.gc	late
CATACC	2.60644	1.4035	2.80147	5ssIntronicRegion	Inclusion	kcl.gc	late	-0.253737	0	1.02287	5ssIntronicRegion	Inclusion	shuffle.gc	late
CACTTA	2.57796	1.33533	2.41185	5ssIntronicRegion	Inclusion	kcl.gc	late	-0.824006	0	0.798347	5ssIntronicRegion	Inclusion	shuffle.gc	late
GTATCA	2.57796	1.48692	2.41363	5ssIntronicRegion	Inclusion	kcl.gc	late	2.18359	1.16482	2.14037	5ssIntronicRegion	Inclusion	shuffle.gc	late
TCTGTC	2.56769	1.83152	1.97448	5ssIntronicRegion	Inclusion	kcl.gc	late	0.473599	0.324777	1.21986	5ssIntronicRegion	Inclusion	shuffle.gc	late
GAGTGC	2.54322	1.56486	2.31188	5ssIntronicRegion	Inclusion	kcl.gc	late	-0.269315	0	0.966998	5ssIntronicRegion	Inclusion	shuffle.gc	late
TTCAAA	2.53091	1.392	1.87789	5ssIntronicRegion	Inclusion	kcl.gc	late	-0.19769	0	1.02489	5ssIntronicRegion	Inclusion	shuffle.gc	late
TACAAA	2.522	1.76564	2.4232	5ssIntronicRegion	Inclusion	kcl.gc	late	-0.137306	0.0703859	1.08818	5ssIntronicRegion	Inclusion	shuffle.gc	late
GTAAAT	2.51189	1.39457	2.02396	5ssIntronicRegion	Inclusion	kcl.gc	late	1.48784	0.468954	1.44582	5ssIntronicRegion	Inclusion	shuffle.gc	late
TATAGG	2.51077	1.47006	2.56911	5ssIntronicRegion	Inclusion	kcl.gc	late	-1.62044	0.548343	0.392045	5ssIntronicRegion	Inclusion	shuffle.gc	late
TATGAT	2.50597	1.85161	2.43842	5ssIntronicRegion	Inclusion	kcl.gc	late	-0.409062	0	0.946429	5ssIntronicRegion	Inclusion	shuffle.gc	late
GATTAC	2.49425	1.75939	3.53669	5ssIntronicRegion	Inclusion	kcl.gc	late	-0.481583	0	0.947876	5ssIntronicRegion	Inclusion	shuffle.gc	late
AAGAAA	2.46237	3.1317	2.45554	5ssIntronicRegion	Inclusion	kcl.gc	late	-0.896325	0.254528	0.815405	5ssIntronicRegion	Inclusion	shuffle.gc	late
AGTTTA	2.43252	1.67297	2.07959	5ssIntronicRegion	Inclusion	kcl.gc	late	-0.00379405	0	0.993858	5ssIntronicRegion	Inclusion	shuffle.gc	late
GTATTC	2.41641	1.48692	2.41363	5ssIntronicRegion	Inclusion	kcl.gc	late	0.135145	0	0.961308	5ssIntronicRegion	Inclusion	shuffle.gc	late
GAAACT	2.40444	1.63892	2.14904	5ssIntronicRegion	Inclusion	kcl.gc	late	0.44404	0.313886	1.25427	5ssIntronicRegion	Inclusion	shuffle.gc	late
AAATAT	2.38948	1.39328	1.80949	5ssIntronicRegion	Inclusion	kcl.gc	late	-0.631532	0.125509	0.872549	5ssIntronicRegion	Inclusion	shuffle.gc	late
CCTCGC	2.38246	1.35919	3.00312	5ssIntronicRegion	Inclusion	kcl.gc	late	0.984324	0.657968	2.24775	5ssIntronicRegion	Inclusion	shuffle.gc	late
ATATAG	2.31945	1.47006	2.56911	5ssIntronicRegion	Inclusion	kcl.gc	late	-0.488942	0	0.911877	5ssIntronicRegion	Inclusion	shuffle.gc	late
ACAGAT	2.30001	1.36996	1.96636	5ssIntronicRegion	Inclusion	kcl.gc	late	0.580358	0.430104	1.34856	5ssIntronicRegion	Inclusion	shuffle.gc	late
CACTAC	2.2762	1.4266	3.74228	5ssIntronicRegion	Inclusion	kcl.gc	late	0.480668	0.304947	1.63306	5ssIntronicRegion	Inclusion	shuffle.gc	late
GAGTAT	2.2611	1.43581	2.14964	5ssIntronicRegion	Inclusion	kcl.gc	late	-0.509129	0.264012	0.682749	5ssIntronicRegion	Inclusion	shuffle.gc	late
GCTTAT	2.25528	1.56486	2.31188	5ssIntronicRegion	Inclusion	kcl.gc	late	-2.12983	1.02134	0.293103	5ssIntronicRegion	Inclusion	shuffle.gc	late
TTACCT	2.17806	1.39457	2.02396	5ssIntronicRegion	Inclusion	kcl.gc	late	1.91995	0.709996	1.53795	5ssIntronicRegion	Inclusion	shuffle.gc	late
CAACAG	2.15941	1.4625	2.05732	5ssIntronicRegion	Inclusion	kcl.gc	late	1.43527	0.940398	1.78305	5ssIntronicRegion	Inclusion	shuffle.gc	late
AACTCT	2.15127	1.55299	1.95537	5ssIntronicRegion	Inclusion	kcl.gc	late	0.0238885	0.131333	1.0977	5ssIntronicRegion	Inclusion	shuffle.gc	late
AGAAAA	2.15115	1.90825	1.91492	5ssIntronicRegion	Inclusion	kcl.gc	late	-0.888531	0.114227	0.868687	5ssIntronicRegion	Inclusion	shuffle.gc	late
AAACTA	2.14306	1.51069	2.325	5ssIntronicRegion	Inclusion	kcl.gc	late	-0.968318	0.265186	0.702703	5ssIntronicRegion	Inclusion	shuffle.gc	late
ACTAAT	2.12981	1.47871	2.23407	5ssIntronicRegion	Inclusion	kcl.gc	late	2.20119	1.23344	2.0042	5ssIntronicRegion	Inclusion	shuffle.gc	late
ATAATG	2.12981	1.38485	2.07103	5ssIntronicRegion	Inclusion	kcl.gc	late	-0.577095	0	0.90179	5ssIntronicRegion	Inclusion	shuffle.gc	late
TATTAT	2.12513	1.50305	1.99661	5ssIntronicRegion	Inclusion	kcl.gc	late	1.63016	1.24538	1.97391	5ssIntronicRegion	Inclusion	shuffle.gc	late
ATGACA	2.11769	1.36876	2.19437	5ssIntronicRegion	Inclusion	kcl.gc	late	0.658729	0.389606	1.42127	5ssIntronicRegion	Inclusion	shuffle.gc	late
CCATTG	2.07481	1.36996	1.96636	5ssIntronicRegion	Inclusion	kcl.gc	late	0.273307	0.227988	1.20261	5ssIntronicRegion	Inclusion	shuffle.gc	late
TAATAA	2.05116	1.62128	2.25287	5ssIntronicRegion	Inclusion	kcl.gc	late	2.51892	0.845139	1.6275	5ssIntronicRegion	Inclusion	shuffle.gc	late
GAACAA	1.97896	1.36876	2.19437	5ssIntronicRegion	Inclusion	kcl.gc	late	-1.75773	0.610471	0.427928	5ssIntronicRegion	Inclusion	shuffle.gc	late
ATGATA	1.97896	1.48692	2.41363	5ssIntronicRegion	Inclusion	kcl.gc	late	0.102789	0	0.946429	5ssIntronicRegion	Inclusion	shuffle.gc	late
ACTGTG	1.91268	1.42838	1.79916	5ssIntronicRegion	Inclusion	kcl.gc	late	-0.257224	0	0.981481	5ssIntronicRegion	Inclusion	shuffle.gc	late
TACCTT	1.89257	1.38485	2.07103	5ssIntronicRegion	Inclusion	kcl.gc	late	0.130952	0	1.01348	5ssIntronicRegion	Inclusion	shuffle.gc	late
TTTAGA	1.84215	1.48037	1.89677	5ssIntronicRegion	Inclusion	kcl.gc	late	1.93623	1.21541	1.82713	5ssIntronicRegion	Inclusion	shuffle.gc	late

## Sheet: non_gc_matched
Supplemental Table 6. Enrichment of k-mers near KCl-dependent and control exons.
kmer	zscore	fe_p	oddsratio	region	direction	set	time	zscore_shuffle	fe_p_shuffle	oddsratio_shuffle	region_shuffle	direction_shuffle	set_shuffle	time_shuffle
CCGGGG	13.9535	3.53187	15.1586	3ssExonicRegion	Exclusion	kcl	early	1.2898	0.319712	1.56135	3ssExonicRegion	Exclusion	shuffle	early
GTCCGG	11.0527	2.71838	12.2836	3ssExonicRegion	Exclusion	kcl	early	2.21876	0.575954	2.23765	3ssExonicRegion	Exclusion	shuffle	early
CCAACC	10.2605	4.16491	6.19604	3ssExonicRegion	Exclusion	kcl	early	-0.424273	0.0685839	0.923039	3ssExonicRegion	Exclusion	shuffle	early
AAGCGC	10.0857	2.45034	11.3286	3ssExonicRegion	Exclusion	kcl	early	-1.25971	0.37639	0.617024	3ssExonicRegion	Exclusion	shuffle	early
CTCTCG	10.0857	2.18428	10.3753	3ssExonicRegion	Exclusion	kcl	early	2.21876	0.412915	1.9872	3ssExonicRegion	Exclusion	shuffle	early
CGGACC	9.11877	2.18428	10.3753	3ssExonicRegion	Exclusion	kcl	early	0.200065	0	1.18905	3ssExonicRegion	Exclusion	shuffle	early
CGGGGC	8.53684	3.03412	6.00506	3ssExonicRegion	Exclusion	kcl	early	-0.783358	0.18001	0.80845	3ssExonicRegion	Exclusion	shuffle	early
GCCGGG	8.45168	2.60656	7.09261	3ssExonicRegion	Exclusion	kcl	early	-0.859331	0.203316	0.768544	3ssExonicRegion	Exclusion	shuffle	early
ACCGCT	8.45168	2.3596	6.61388	3ssExonicRegion	Exclusion	kcl	early	-0.859331	0.0958093	0.865411	3ssExonicRegion	Exclusion	shuffle	early
GTGCCG	8.15182	1.92055	9.42376	3ssExonicRegion	Exclusion	kcl	early	-1.04014	0.262837	0.658774	3ssExonicRegion	Exclusion	shuffle	early
CTGCGA	8.15182	1.92055	9.42376	3ssExonicRegion	Exclusion	kcl	early	1.72124	0.412915	1.9872	3ssExonicRegion	Exclusion	shuffle	early
ATCGCA	8.15182	1.92055	9.42376	3ssExonicRegion	Exclusion	kcl	early	-0.59069	0.102964	0.847758	3ssExonicRegion	Exclusion	shuffle	early
GCGTGG	7.97856	2.79712	5.68393	3ssExonicRegion	Exclusion	kcl	early	3.02214	0.944026	2.3269	3ssExonicRegion	Exclusion	shuffle	early
GCGGGG	7.76794	2.11553	6.136	3ssExonicRegion	Exclusion	kcl	early	-0.556092	0.218708	0.741104	3ssExonicRegion	Exclusion	shuffle	early
CCTATA	7.18487	1.65959	8.47387	3ssExonicRegion	Exclusion	kcl	early	-1.71898	0.651121	0.422722	3ssExonicRegion	Exclusion	shuffle	early
GCGCGG	7.18487	1.65959	8.47387	3ssExonicRegion	Exclusion	kcl	early	-1.13492	0.296753	0.592903	3ssExonicRegion	Exclusion	shuffle	early
ACCGGG	7.18487	1.65959	8.47387	3ssExonicRegion	Exclusion	kcl	early	1.99329	0.465102	2.31842	3ssExonicRegion	Exclusion	shuffle	early
ACACGC	7.18487	1.65959	8.47387	3ssExonicRegion	Exclusion	kcl	early	-0.689928	0.123644	0.791257	3ssExonicRegion	Exclusion	shuffle	early
GCGGTC	7.18487	1.65959	8.47387	3ssExonicRegion	Exclusion	kcl	early	-0.633917	0.11194	0.824218	3ssExonicRegion	Exclusion	shuffle	early
GGGTGG	6.87608	2.5551	4.49955	3ssExonicRegion	Exclusion	kcl	early	1.79421	0.515806	1.659	3ssExonicRegion	Exclusion	shuffle	early
CGGGGA	6.862	2.10341	4.72395	3ssExonicRegion	Exclusion	kcl	early	0.851149	0.089479	1.2397	3ssExonicRegion	Exclusion	shuffle	early
CGGGCC	6.862	2.33147	5.04337	3ssExonicRegion	Exclusion	kcl	early	3.02214	0.944026	2.3269	3ssExonicRegion	Exclusion	shuffle	early
CGGTGC	6.862	2.33147	5.04337	3ssExonicRegion	Exclusion	kcl	early	-1.38342	0.449719	0.627646	3ssExonicRegion	Exclusion	shuffle	early
GGGGAC	6.62892	2.88079	2.94812	3ssExonicRegion	Exclusion	kcl	early	-0.365329	0.120619	0.898168	3ssExonicRegion	Exclusion	shuffle	early
CGCCCC	6.55258	2.56898	3.98192	3ssExonicRegion	Exclusion	kcl	early	1.69898	0.489192	1.59263	3ssExonicRegion	Exclusion	shuffle	early
GACTCT	6.47664	2.69371	3.32973	3ssExonicRegion	Exclusion	kcl	early	1.11738	0.304282	1.32594	3ssExonicRegion	Exclusion	shuffle	early
CACGCT	6.40045	1.63781	5.18279	3ssExonicRegion	Exclusion	kcl	early	3.71673	0.838771	2.98628	3ssExonicRegion	Exclusion	shuffle	early
ATAAGC	6.40045	1.87478	5.65897	3ssExonicRegion	Exclusion	kcl	early	1.53505	0.374149	1.78847	3ssExonicRegion	Exclusion	shuffle	early
GACACA	6.34903	2.59687	3.63737	3ssExonicRegion	Exclusion	kcl	early	0.0954378	0	1.06157	3ssExonicRegion	Exclusion	shuffle	early
AAGGTG	6.32874	3.01353	2.79287	3ssExonicRegion	Exclusion	kcl	early	2.81011	1.05379	1.68736	3ssExonicRegion	Exclusion	shuffle	early
TCGCAG	6.30373	1.87901	4.4051	3ssExonicRegion	Exclusion	kcl	early	0.499338	0	1.11471	3ssExonicRegion	Exclusion	shuffle	early
CCGGGA	6.30373	2.10341	4.72395	3ssExonicRegion	Exclusion	kcl	early	-0.503739	0.0850113	0.890119	3ssExonicRegion	Exclusion	shuffle	early
GCCGCA	6.21792	1.40196	7.52566	3ssExonicRegion	Exclusion	kcl	early	1.74477	0.344461	2.48177	3ssExonicRegion	Exclusion	shuffle	early
AAGGCG	6.21792	1.40196	7.52566	3ssExonicRegion	Exclusion	kcl	early	-1.96333	0.844348	0.36954	3ssExonicRegion	Exclusion	shuffle	early
ACCGCC	6.21792	1.40196	7.52566	3ssExonicRegion	Exclusion	kcl	early	-0.689928	0.123644	0.791257	3ssExonicRegion	Exclusion	shuffle	early
GCTGTG	6.13284	3.30332	2.21307	3ssExonicRegion	Exclusion	kcl	early	-1.18022	0.439651	0.803599	3ssExonicRegion	Exclusion	shuffle	early
AGGTGG	6.06052	2.66614	2.64107	3ssExonicRegion	Exclusion	kcl	early	-1.27565	0.502139	0.737512	3ssExonicRegion	Exclusion	shuffle	early
GGACGA	5.9091	1.90791	3.77897	3ssExonicRegion	Exclusion	kcl	early	0.467441	0.189612	1.36492	3ssExonicRegion	Exclusion	shuffle	early
AGCTCC	5.79231	2.49676	2.56538	3ssExonicRegion	Exclusion	kcl	early	-0.945874	0.18443	0.863668	3ssExonicRegion	Exclusion	shuffle	early
TCCGTG	5.74545	1.87901	4.4051	3ssExonicRegion	Exclusion	kcl	early	-0.527638	0.089938	0.879139	3ssExonicRegion	Exclusion	shuffle	early
GCGGCA	5.74545	1.65872	4.08681	3ssExonicRegion	Exclusion	kcl	early	-0.527638	0	0.989945	3ssExonicRegion	Exclusion	shuffle	early
GGCCGC	5.74545	1.87901	4.4051	3ssExonicRegion	Exclusion	kcl	early	-1.68346	0.631022	0.537492	3ssExonicRegion	Exclusion	shuffle	early
TGGCCA	5.60741	2.64728	2.48171	3ssExonicRegion	Exclusion	kcl	early	-2.43201	1.18053	0.580592	3ssExonicRegion	Exclusion	shuffle	early
GGGGCC	5.48721	2.24751	3.1148	3ssExonicRegion	Exclusion	kcl	early	0.929808	0.234933	1.29926	3ssExonicRegion	Exclusion	shuffle	early
GTGATG	5.46927	2.40491	2.32439	3ssExonicRegion	Exclusion	kcl	early	2.54581	0.997082	1.62208	3ssExonicRegion	Exclusion	shuffle	early
CCCGAC	5.42561	1.90791	3.77897	3ssExonicRegion	Exclusion	kcl	early	0.467441	0.0845796	1.21214	3ssExonicRegion	Exclusion	shuffle	early
CCGCTT	5.42561	1.49658	3.30071	3ssExonicRegion	Exclusion	kcl	early	-0.527638	0	0.989945	3ssExonicRegion	Exclusion	shuffle	early
GCTCAG	5.41259	2.56231	2.38616	3ssExonicRegion	Exclusion	kcl	early	1.02233	0.227653	1.18563	3ssExonicRegion	Exclusion	shuffle	early
GCAGCT	5.36996	2.56536	2.07033	3ssExonicRegion	Exclusion	kcl	early	-1.37056	0.53533	0.771014	3ssExonicRegion	Exclusion	shuffle	early
TGCTCT	5.25588	2.42159	2.6181	3ssExonicRegion	Exclusion	kcl	early	-0.566909	0.120619	0.898168	3ssExonicRegion	Exclusion	shuffle	early
CAACCC	5.25523	1.95076	3.40393	3ssExonicRegion	Exclusion	kcl	early	-1.04017	0.284405	0.740393	3ssExonicRegion	Exclusion	shuffle	early
ACGCTG	5.25523	1.55837	3.02032	3ssExonicRegion	Exclusion	kcl	early	3.17028	0.727613	1.99265	3ssExonicRegion	Exclusion	shuffle	early
TGGGCT	5.2107	2.08729	2.45498	3ssExonicRegion	Exclusion	kcl	early	0.543835	0.0603065	1.10187	3ssExonicRegion	Exclusion	shuffle	early
GTGGCC	5.2107	2.25276	2.53647	3ssExonicRegion	Exclusion	kcl	early	-2.44632	1.20568	0.5438	3ssExonicRegion	Exclusion	shuffle	early
GCCCCC	5.2107	2.52154	2.76969	3ssExonicRegion	Exclusion	kcl	early	2.49291	0.769386	1.58676	3ssExonicRegion	Exclusion	shuffle	early
GCTGGC	5.14265	2.56236	2.33719	3ssExonicRegion	Exclusion	kcl	early	1.21751	0.453413	1.3163	3ssExonicRegion	Exclusion	shuffle	early
CTGCGG	5.12171	1.69423	2.70125	3ssExonicRegion	Exclusion	kcl	early	-0.910884	0.468871	0.677418	3ssExonicRegion	Exclusion	shuffle	early
GGTCTA	5.03296	1.40523	4.70745	3ssExonicRegion	Exclusion	kcl	early	-1.71898	0.651121	0.422722	3ssExonicRegion	Exclusion	shuffle	early
AAGCGG	5.03296	1.40523	4.70745	3ssExonicRegion	Exclusion	kcl	early	-0.966788	0.237935	0.705821	3ssExonicRegion	Exclusion	shuffle	early
CAACGA	5.03296	1.40523	4.70745	3ssExonicRegion	Exclusion	kcl	early	-1.96333	0.844348	0.36954	3ssExonicRegion	Exclusion	shuffle	early
GCCATA	5.03296	1.40523	4.70745	3ssExonicRegion	Exclusion	kcl	early	-0.227689	0	0.989964	3ssExonicRegion	Exclusion	shuffle	early
AGGTTC	4.94212	1.69996	3.53963	3ssExonicRegion	Exclusion	kcl	early	-1.68346	0.631022	0.537492	3ssExonicRegion	Exclusion	shuffle	early
CATGTA	4.94212	1.69996	3.53963	3ssExonicRegion	Exclusion	kcl	early	0.135748	0	1.10094	3ssExonicRegion	Exclusion	shuffle	early
CCGTGT	4.94212	1.69996	3.53963	3ssExonicRegion	Exclusion	kcl	early	-0.189064	0	0.989927	3ssExonicRegion	Exclusion	shuffle	early
TAGCTG	4.94212	1.69996	3.53963	3ssExonicRegion	Exclusion	kcl	early	0.9137	0.202197	1.41811	3ssExonicRegion	Exclusion	shuffle	early
GCTCCT	4.92905	1.80544	2.07842	3ssExonicRegion	Exclusion	kcl	early	0.255564	0.114321	1.12792	3ssExonicRegion	Exclusion	shuffle	early
CAGCCT	4.84348	2.26088	2.17188	3ssExonicRegion	Exclusion	kcl	early	-0.485249	0.0950225	0.929742	3ssExonicRegion	Exclusion	shuffle	early
TCAGCC	4.78831	2.08897	2.30978	3ssExonicRegion	Exclusion	kcl	early	-2.25606	1.03156	0.611714	3ssExonicRegion	Exclusion	shuffle	early
AGAGTG	4.78831	2.08897	2.30978	3ssExonicRegion	Exclusion	kcl	early	0.0590244	0	1.03577	3ssExonicRegion	Exclusion	shuffle	early
CACGGA	4.76994	1.81143	2.99404	3ssExonicRegion	Exclusion	kcl	early	1.69898	0.489192	1.59263	3ssExonicRegion	Exclusion	shuffle	early
CCGCTG	4.76994	1.81143	2.99404	3ssExonicRegion	Exclusion	kcl	early	-1.45204	0.492227	0.656899	3ssExonicRegion	Exclusion	shuffle	early
GCTGCG	4.76994	1.81143	2.99404	3ssExonicRegion	Exclusion	kcl	early	-0.968395	0.2572	0.775632	3ssExonicRegion	Exclusion	shuffle	early
GGTGAT	4.76719	1.76457	2.72287	3ssExonicRegion	Exclusion	kcl	early	1.42523	0.411159	1.42197	3ssExonicRegion	Exclusion	shuffle	early
CCCCCA	4.71945	2.08729	2.45498	3ssExonicRegion	Exclusion	kcl	early	2.18577	0.662077	1.52657	3ssExonicRegion	Exclusion	shuffle	early
CTCAGC	4.68728	2.09889	2.20118	3ssExonicRegion	Exclusion	kcl	early	0.241606	0.0502959	1.0679	3ssExonicRegion	Exclusion	shuffle	early
GCTCCC	4.65237	1.92533	2.37365	3ssExonicRegion	Exclusion	kcl	early	0.778396	0.198692	1.2143	3ssExonicRegion	Exclusion	shuffle	early
CCGCCT	4.62889	1.44305	3.76909	3ssExonicRegion	Exclusion	kcl	early	-1.19102	0.346021	0.658151	3ssExonicRegion	Exclusion	shuffle	early
CACGCC	4.62889	1.44305	3.76909	3ssExonicRegion	Exclusion	kcl	early	-1.76244	0.685246	0.492707	3ssExonicRegion	Exclusion	shuffle	early
CGTGGC	4.62889	1.44305	3.76909	3ssExonicRegion	Exclusion	kcl	early	-0.214593	0	0.989954	3ssExonicRegion	Exclusion	shuffle	early
TCCGGC	4.62889	1.44305	3.76909	3ssExonicRegion	Exclusion	kcl	early	-1.44776	0.483791	0.591788	3ssExonicRegion	Exclusion	shuffle	early
CATCGC	4.62889	1.44305	3.76909	3ssExonicRegion	Exclusion	kcl	early	-0.59069	0.102964	0.847758	3ssExonicRegion	Exclusion	shuffle	early
CGTGGG	4.62889	1.44305	3.76909	3ssExonicRegion	Exclusion	kcl	early	1.53505	0.374149	1.78847	3ssExonicRegion	Exclusion	shuffle	early
CCTCCG	4.62889	1.44305	3.76909	3ssExonicRegion	Exclusion	kcl	early	-1.52272	0.5259	0.547959	3ssExonicRegion	Exclusion	shuffle	early
TCTGCT	4.53106	1.95053	2.13975	3ssExonicRegion	Exclusion	kcl	early	-0.335226	0	0.989777	3ssExonicRegion	Exclusion	shuffle	early
GGCCAT	4.52725	1.59651	2.36748	3ssExonicRegion	Exclusion	kcl	early	-0.164527	0.0662999	0.92715	3ssExonicRegion	Exclusion	shuffle	early
TGTGAT	4.47217	1.67549	2.52543	3ssExonicRegion	Exclusion	kcl	early	-2.22703	1.0239	0.554318	3ssExonicRegion	Exclusion	shuffle	early
CGCCTG	4.45864	1.49658	3.30071	3ssExonicRegion	Exclusion	kcl	early	-0.818413	0.190653	0.790494	3ssExonicRegion	Exclusion	shuffle	early
GTTCCG	4.45864	1.49658	3.30071	3ssExonicRegion	Exclusion	kcl	early	-1.13309	0.321583	0.69105	3ssExonicRegion	Exclusion	shuffle	early
GCCGCT	4.45864	1.87901	4.4051	3ssExonicRegion	Exclusion	kcl	early	-0.527638	0.203316	0.768544	3ssExonicRegion	Exclusion	shuffle	early
GCTCCG	4.45864	1.49658	3.30071	3ssExonicRegion	Exclusion	kcl	early	0.147528	0	1.11471	3ssExonicRegion	Exclusion	shuffle	early
GCCTGA	4.4253	1.76536	2.60215	3ssExonicRegion	Exclusion	kcl	early	-2.21266	1.02216	0.516676	3ssExonicRegion	Exclusion	shuffle	early
CCTGTG	4.40279	1.81511	1.86679	3ssExonicRegion	Exclusion	kcl	early	0.880301	0.264197	1.18192	3ssExonicRegion	Exclusion	shuffle	early
CTACCT	4.39073	1.69423	2.70125	3ssExonicRegion	Exclusion	kcl	early	0.653813	0.149162	1.2217	3ssExonicRegion	Exclusion	shuffle	early
CCCCGC	4.39033	1.90791	3.77897	3ssExonicRegion	Exclusion	kcl	early	-1.55415	0.421474	0.657526	3ssExonicRegion	Exclusion	shuffle	early
ACCTCG	4.39033	1.55837	3.02032	3ssExonicRegion	Exclusion	kcl	early	-1.08339	0.301406	0.717966	3ssExonicRegion	Exclusion	shuffle	early
GCTGAC	4.37321	1.46241	2.13051	3ssExonicRegion	Exclusion	kcl	early	0.0704175	0	1.04581	3ssExonicRegion	Exclusion	shuffle	early
CAGCTG	4.37119	1.7007	1.6356	3ssExonicRegion	Exclusion	kcl	early	0.28526	0.168503	1.10237	3ssExonicRegion	Exclusion	shuffle	early
ATGTGG	4.35892	1.86731	2.15374	3ssExonicRegion	Exclusion	kcl	early	-0.148756	0.0515346	0.950825	3ssExonicRegion	Exclusion	shuffle	early
GTGGCT	4.34868	1.86338	2.00036	3ssExonicRegion	Exclusion	kcl	early	0.631969	0.164157	1.14631	3ssExonicRegion	Exclusion	shuffle	early
ACAGCA	4.32389	1.90269	1.95001	3ssExonicRegion	Exclusion	kcl	early	-2.08019	0.890383	0.669585	3ssExonicRegion	Exclusion	shuffle	early
CTGTGG	4.31114	1.71252	1.71697	3ssExonicRegion	Exclusion	kcl	early	0.165346	0.0844654	1.06688	3ssExonicRegion	Exclusion	shuffle	early
CTGCTG	4.23931	1.83526	1.68144	3ssExonicRegion	Exclusion	kcl	early	-0.673748	0.120257	0.928675	3ssExonicRegion	Exclusion	shuffle	early
CACAGC	4.20373	1.80544	2.07842	3ssExonicRegion	Exclusion	kcl	early	-0.929482	0.250132	0.834402	3ssExonicRegion	Exclusion	shuffle	early
GGGGCT	4.18303	1.69845	2.18898	3ssExonicRegion	Exclusion	kcl	early	-0.789683	0.194267	0.852472	3ssExonicRegion	Exclusion	shuffle	early
CTCATC	4.14983	1.50989	2.41804	3ssExonicRegion	Exclusion	kcl	early	-0.403409	0.0642288	0.930777	3ssExonicRegion	Exclusion	shuffle	early
CCCCAA	4.14983	1.34902	2.31083	3ssExonicRegion	Exclusion	kcl	early	-0.842813	0.306052	0.778579	3ssExonicRegion	Exclusion	shuffle	early
AGCTGT	4.1177	1.95023	1.99756	3ssExonicRegion	Exclusion	kcl	early	-1.03904	0.228938	0.854585	3ssExonicRegion	Exclusion	shuffle	early
CTCCCG	4.08341	1.42703	2.36136	3ssExonicRegion	Exclusion	kcl	early	-2.38143	1.02216	0.516676	3ssExonicRegion	Exclusion	shuffle	early
TGTGGC	4.06195	1.74816	2.01196	3ssExonicRegion	Exclusion	kcl	early	-0.547784	0.112354	0.908916	3ssExonicRegion	Exclusion	shuffle	early
TGCCTC	4.06195	1.95053	2.13975	3ssExonicRegion	Exclusion	kcl	early	0.248396	0	1.03033	3ssExonicRegion	Exclusion	shuffle	early
ACACAG	4.06195	1.74816	2.01196	3ssExonicRegion	Exclusion	kcl	early	-0.929482	0.250132	0.834402	3ssExonicRegion	Exclusion	shuffle	early
CAACAC	4.02523	1.51808	2.5639	3ssExonicRegion	Exclusion	kcl	early	0.116741	0	1.0809	3ssExonicRegion	Exclusion	shuffle	early
TGCCCA	4.01293	1.49219	2.03069	3ssExonicRegion	Exclusion	kcl	early	2.91598	0.942956	1.73333	3ssExonicRegion	Exclusion	shuffle	early
CAGGAC	4.01293	1.49219	2.03069	3ssExonicRegion	Exclusion	kcl	early	1.14844	0.254914	1.23119	3ssExonicRegion	Exclusion	shuffle	early
CAACCA	3.98039	1.44292	2.6741	3ssExonicRegion	Exclusion	kcl	early	-0.726164	0.163019	0.836071	3ssExonicRegion	Exclusion	shuffle	early
CCTACC	3.98039	1.44292	2.6741	3ssExonicRegion	Exclusion	kcl	early	-0.726164	0.163019	0.836071	3ssExonicRegion	Exclusion	shuffle	early
GAGCGG	3.98039	1.44292	2.6741	3ssExonicRegion	Exclusion	kcl	early	-0.752912	0.17091	0.823413	3ssExonicRegion	Exclusion	shuffle	early
CTGGAG	3.96383	1.72722	1.65403	3ssExonicRegion	Exclusion	kcl	early	0.592378	0.122245	1.07972	3ssExonicRegion	Exclusion	shuffle	early
GAAGGT	3.93168	1.43149	1.84396	3ssExonicRegion	Exclusion	kcl	early	0.646486	0.171129	1.15906	3ssExonicRegion	Exclusion	shuffle	early
GCCTGT	3.93168	1.56151	1.89837	3ssExonicRegion	Exclusion	kcl	early	-1.2178	0.46661	0.761266	3ssExonicRegion	Exclusion	shuffle	early
CTGGTC	3.91565	1.43808	2.27074	3ssExonicRegion	Exclusion	kcl	early	-0.162049	0	0.989862	3ssExonicRegion	Exclusion	shuffle	early
GGACTG	3.91565	1.43808	2.27074	3ssExonicRegion	Exclusion	kcl	early	1.37432	0.396494	1.39352	3ssExonicRegion	Exclusion	shuffle	early
GGGCCC	3.91565	1.43808	2.27074	3ssExonicRegion	Exclusion	kcl	early	0.333044	0.0639084	1.11566	3ssExonicRegion	Exclusion	shuffle	early
CTGTGA	3.9115	1.68562	1.90328	3ssExonicRegion	Exclusion	kcl	early	0.399314	0.0993638	1.0952	3ssExonicRegion	Exclusion	shuffle	early
CCTCTC	3.85953	1.57844	2.02339	3ssExonicRegion	Exclusion	kcl	early	-0.929482	0.250132	0.834402	3ssExonicRegion	Exclusion	shuffle	early
AGTGCC	3.82749	1.34902	2.31083	3ssExonicRegion	Exclusion	kcl	early	1.83245	0.556277	1.57749	3ssExonicRegion	Exclusion	shuffle	early
TGGGGG	3.82749	1.34902	2.31083	3ssExonicRegion	Exclusion	kcl	early	-0.413313	0.0662999	0.92715	3ssExonicRegion	Exclusion	shuffle	early
CCATGT	3.81488	1.46241	2.13051	3ssExonicRegion	Exclusion	kcl	early	0.333044	0.0639084	1.11566	3ssExonicRegion	Exclusion	shuffle	early
CAGCTC	3.81143	1.5157	1.84832	3ssExonicRegion	Exclusion	kcl	early	0.84553	0.308467	1.24417	3ssExonicRegion	Exclusion	shuffle	early
GCCTCC	3.80715	1.55814	1.85627	3ssExonicRegion	Exclusion	kcl	early	0.762735	0.211034	1.16011	3ssExonicRegion	Exclusion	shuffle	early
CCCCAG	3.78138	1.78216	1.77164	3ssExonicRegion	Exclusion	kcl	early	0.495171	0.136723	1.1008	3ssExonicRegion	Exclusion	shuffle	early
CGGGAG	3.74152	1.42703	2.36136	3ssExonicRegion	Exclusion	kcl	early	0.653813	0.149162	1.2217	3ssExonicRegion	Exclusion	shuffle	early
CCCAAC	3.74152	1.42703	2.36136	3ssExonicRegion	Exclusion	kcl	early	0.101822	0	1.06702	3ssExonicRegion	Exclusion	shuffle	early
GACTGC	3.74152	1.42703	2.36136	3ssExonicRegion	Exclusion	kcl	early	0.396138	0.0735836	1.15702	3ssExonicRegion	Exclusion	shuffle	early
GACCTG	3.70531	1.3988	1.7702	3ssExonicRegion	Exclusion	kcl	early	1.0013	0.3675	1.26448	3ssExonicRegion	Exclusion	shuffle	early
CTGCTC	3.69991	1.47294	1.80327	3ssExonicRegion	Exclusion	kcl	early	2.13078	0.651445	1.43344	3ssExonicRegion	Exclusion	shuffle	early
TTGCTC	3.65974	1.3466	2.42679	3ssExonicRegion	Exclusion	kcl	early	-1.00216	0.269843	0.759369	3ssExonicRegion	Exclusion	shuffle	early
TTGGTA	3.65974	1.3466	2.42679	3ssExonicRegion	Exclusion	kcl	early	0.108875	0	1.07339	3ssExonicRegion	Exclusion	shuffle	early
CAGCCG	3.65974	1.3466	2.42679	3ssExonicRegion	Exclusion	kcl	early	-1.23435	0.377111	0.704474	3ssExonicRegion	Exclusion	shuffle	early
TGCTGG	3.60479	1.48944	1.65034	3ssExonicRegion	Exclusion	kcl	early	-1.38559	0.544709	0.765899	3ssExonicRegion	Exclusion	shuffle	early
CCTGGC	3.5961	1.31332	1.71576	3ssExonicRegion	Exclusion	kcl	early	-0.327529	0.0487313	0.954729	3ssExonicRegion	Exclusion	shuffle	early
GGTGGA	3.59284	1.34647	1.83929	3ssExonicRegion	Exclusion	kcl	early	2.81011	1.20732	1.78276	3ssExonicRegion	Exclusion	shuffle	early
CAGGCC	3.58956	1.5157	1.84832	3ssExonicRegion	Exclusion	kcl	early	-1.72823	0.655704	0.705427	3ssExonicRegion	Exclusion	shuffle	early
CTGCAT	3.53572	1.31643	2.04976	3ssExonicRegion	Exclusion	kcl	early	1.95714	0.621064	1.56706	3ssExonicRegion	Exclusion	shuffle	early
GGGCTC	3.53572	1.31643	2.04976	3ssExonicRegion	Exclusion	kcl	early	1.11738	0.304282	1.32594	3ssExonicRegion	Exclusion	shuffle	early
GTGGGC	3.53572	1.52593	2.23823	3ssExonicRegion	Exclusion	kcl	early	1.37432	0.304282	1.32594	3ssExonicRegion	Exclusion	shuffle	early
GCCCCG	3.52544	1.49658	3.30071	3ssExonicRegion	Exclusion	kcl	early	-1.83014	0.586902	0.57481	3ssExonicRegion	Exclusion	shuffle	early
GGGCCT	3.50515	1.34831	2.20382	3ssExonicRegion	Exclusion	kcl	early	2.21697	0.7043	1.72249	3ssExonicRegion	Exclusion	shuffle	early
GGTCCC	3.50515	1.34831	2.20382	3ssExonicRegion	Exclusion	kcl	early	2.517	0.833018	1.81482	3ssExonicRegion	Exclusion	shuffle	early
CCTCCC	3.48366	1.64543	1.9	3ssExonicRegion	Exclusion	kcl	early	-2.13381	0.931637	0.652443	3ssExonicRegion	Exclusion	shuffle	early
TGGGGA	3.47842	1.39116	1.89512	3ssExonicRegion	Exclusion	kcl	early	0.0556353	0	1.0338	3ssExonicRegion	Exclusion	shuffle	early
GAGCAG	3.4666	1.86433	1.7779	3ssExonicRegion	Exclusion	kcl	early	-1.46235	0.517837	0.780544	3ssExonicRegion	Exclusion	shuffle	early
CTCTGG	3.43563	1.30426	1.67152	3ssExonicRegion	Exclusion	kcl	early	2.44097	0.830999	1.45101	3ssExonicRegion	Exclusion	shuffle	early
CTGGGC	3.36768	1.56151	1.89837	3ssExonicRegion	Exclusion	kcl	early	0.0464249	0.0512792	1.07096	3ssExonicRegion	Exclusion	shuffle	early
TCAAGG	3.25655	1.37401	2.15021	3ssExonicRegion	Exclusion	kcl	early	2.86178	0.887761	1.76759	3ssExonicRegion	Exclusion	shuffle	early
ATGGTG	3.23665	1.30461	1.8935	3ssExonicRegion	Exclusion	kcl	early	1.21196	0.35992	1.32715	3ssExonicRegion	Exclusion	shuffle	early
AGCAGC	3.12464	1.40947	1.64015	3ssExonicRegion	Exclusion	kcl	early	-2.31937	0.718271	0.722934	3ssExonicRegion	Exclusion	shuffle	early
GTGCCC	2.54688	1.34831	2.20382	3ssExonicRegion	Exclusion	kcl	early	-0.162049	0.0659687	1.12393	3ssExonicRegion	Exclusion	shuffle	early
CATCGC	10.3989	2.47698	11.9388	3ssExonicRegion	Exclusion	kcl	late	1.25258	0.384282	1.68439	3ssExonicRegion	Exclusion	shuffle	late
ACGATG	10.3989	2.47698	11.9388	3ssExonicRegion	Exclusion	kcl	late	-1.49399	0.411294	0.522584	3ssExonicRegion	Exclusion	shuffle	late
CGCCCC	10.3989	2.47698	11.9388	3ssExonicRegion	Exclusion	kcl	late	-1.49399	0.411294	0.522584	3ssExonicRegion	Exclusion	shuffle	late
AGCTGT	8.60843	4.62112	3.51996	3ssExonicRegion	Exclusion	kcl	late	-0.543474	0.100348	0.915544	3ssExonicRegion	Exclusion	shuffle	late
GTGCGC	8.41508	1.93818	9.92879	3ssExonicRegion	Exclusion	kcl	late	2.74439	0.865014	2.81294	3ssExonicRegion	Exclusion	shuffle	late
GCGTGG	8.41508	1.93818	9.92879	3ssExonicRegion	Exclusion	kcl	late	1.37641	0.424562	1.8422	3ssExonicRegion	Exclusion	shuffle	late
CCCATC	7.49458	3.3724	3.77336	3ssExonicRegion	Exclusion	kcl	late	3.44049	1.17747	1.96104	3ssExonicRegion	Exclusion	shuffle	late
TACGGT	7.42316	1.67339	8.92683	3ssExonicRegion	Exclusion	kcl	late	1.37641	0.424562	1.8422	3ssExonicRegion	Exclusion	shuffle	late
ACCGGG	7.34174	2.14252	6.46684	3ssExonicRegion	Exclusion	kcl	late	2.40074	0.771478	2.37355	3ssExonicRegion	Exclusion	shuffle	late
CATACA	7.34174	2.14252	6.46684	3ssExonicRegion	Exclusion	kcl	late	1.25258	0.384282	1.68439	3ssExonicRegion	Exclusion	shuffle	late
CCTACA	7.28338	2.8471	4.40453	3ssExonicRegion	Exclusion	kcl	late	-2.02355	0.865119	0.547457	3ssExonicRegion	Exclusion	shuffle	late
CTATAG	6.64034	1.89703	5.9633	3ssExonicRegion	Exclusion	kcl	late	-2.07548	0.835188	0.347674	3ssExonicRegion	Exclusion	shuffle	late
ACTAGA	6.64034	1.89703	5.9633	3ssExonicRegion	Exclusion	kcl	late	-1.0511	0.216509	0.697544	3ssExonicRegion	Exclusion	shuffle	late
CGCTCT	6.64034	1.89703	5.9633	3ssExonicRegion	Exclusion	kcl	late	1.58124	0.49381	1.75652	3ssExonicRegion	Exclusion	shuffle	late
GGCGGC	6.55789	1.90634	4.64283	3ssExonicRegion	Exclusion	kcl	late	0.316853	0	1.04958	3ssExonicRegion	Exclusion	shuffle	late
GTAGAG	6.55789	2.13592	4.97955	3ssExonicRegion	Exclusion	kcl	late	-0.0453162	0	1.04958	3ssExonicRegion	Exclusion	shuffle	late
TGCGCA	6.43124	1.4124	7.9269	3ssExonicRegion	Exclusion	kcl	late	2.60291	0.771391	3.16105	3ssExonicRegion	Exclusion	shuffle	late
CGTTAT	6.43124	1.4124	7.9269	3ssExonicRegion	Exclusion	kcl	late	-1.49601	0.343678	0.418449	3ssExonicRegion	Exclusion	shuffle	late
CCTATA	6.43124	1.4124	7.9269	3ssExonicRegion	Exclusion	kcl	late	0.864244	0.268353	1.57737	3ssExonicRegion	Exclusion	shuffle	late
AGGCGC	6.43124	1.4124	7.9269	3ssExonicRegion	Exclusion	kcl	late	-1.2281	0.260445	0.597839	3ssExonicRegion	Exclusion	shuffle	late
CTCTCT	6.16994	2.13314	2.50519	3ssExonicRegion	Exclusion	kcl	late	-0.835005	0.471803	0.725254	3ssExonicRegion	Exclusion	shuffle	late
GCTCTC	6.09169	1.99322	2.87204	3ssExonicRegion	Exclusion	kcl	late	0.582685	0	1.04995	3ssExonicRegion	Exclusion	shuffle	late
GTGGCT	6.07779	2.76081	2.92423	3ssExonicRegion	Exclusion	kcl	late	3.27136	1.22807	2.03582	3ssExonicRegion	Exclusion	shuffle	late
CTCGGG	5.93894	1.65577	5.46079	3ssExonicRegion	Exclusion	kcl	late	0.33638	0.114045	1.26063	3ssExonicRegion	Exclusion	shuffle	late
GGCCGC	5.93894	1.65577	5.46079	3ssExonicRegion	Exclusion	kcl	late	0.794478	0.2427	1.47229	3ssExonicRegion	Exclusion	shuffle	late
AGCCGA	5.93894	1.65577	5.46079	3ssExonicRegion	Exclusion	kcl	late	-1.73402	0.573402	0.464052	3ssExonicRegion	Exclusion	shuffle	late
CAGCTG	5.6573	2.77132	2.14706	3ssExonicRegion	Exclusion	kcl	late	-1.30357	0.806251	0.706116	3ssExonicRegion	Exclusion	shuffle	late
GGGCCT	5.43841	2.32395	2.8058	3ssExonicRegion	Exclusion	kcl	late	1.68546	0.523936	1.50946	3ssExonicRegion	Exclusion	shuffle	late
GACTCA	5.42731	2.04744	3.32648	3ssExonicRegion	Exclusion	kcl	late	1.20131	0.349026	1.40567	3ssExonicRegion	Exclusion	shuffle	late
CGCTGG	5.41249	1.68129	4.3068	3ssExonicRegion	Exclusion	kcl	late	-0.0915178	0	1.04947	3ssExonicRegion	Exclusion	shuffle	late
GCTGTG	5.35753	2.85739	2.1447	3ssExonicRegion	Exclusion	kcl	late	0.711549	0.31374	1.20361	3ssExonicRegion	Exclusion	shuffle	late
AGCACG	5.23754	1.41934	4.95931	3ssExonicRegion	Exclusion	kcl	late	-1.39256	0.37246	0.580675	3ssExonicRegion	Exclusion	shuffle	late
AGTGCT	5.07661	2.06842	2.77778	3ssExonicRegion	Exclusion	kcl	late	-2.0683	0.914115	0.566834	3ssExonicRegion	Exclusion	shuffle	late
AGGTGG	5.03952	1.81129	2.74434	3ssExonicRegion	Exclusion	kcl	late	0.582685	0.0671255	1.12113	3ssExonicRegion	Exclusion	shuffle	late
TAGCTG	5.02234	1.8506	3.15691	3ssExonicRegion	Exclusion	kcl	late	-1.60002	0.542668	0.596142	3ssExonicRegion	Exclusion	shuffle	late
GCAACT	4.83979	1.46132	3.97146	3ssExonicRegion	Exclusion	kcl	late	0.744859	0.222898	1.40225	3ssExonicRegion	Exclusion	shuffle	late
AGGGTA	4.83979	1.46132	3.97146	3ssExonicRegion	Exclusion	kcl	late	2.16877	0.700492	2.10994	3ssExonicRegion	Exclusion	shuffle	late
GCCTTG	4.81101	1.97053	2.6	3ssExonicRegion	Exclusion	kcl	late	0.565878	0.128652	1.16928	3ssExonicRegion	Exclusion	shuffle	late
TGGCTC	4.74594	1.89036	2.66391	3ssExonicRegion	Exclusion	kcl	late	0.582685	0.141339	1.19247	3ssExonicRegion	Exclusion	shuffle	late
AGCGGC	4.67928	1.51947	3.47855	3ssExonicRegion	Exclusion	kcl	late	1.16305	0.352951	1.5792	3ssExonicRegion	Exclusion	shuffle	late
GGGCAT	4.62167	1.58635	3.18362	3ssExonicRegion	Exclusion	kcl	late	-1.46018	0.444189	0.60915	3ssExonicRegion	Exclusion	shuffle	late
AGTTCC	4.62167	1.58635	3.18362	3ssExonicRegion	Exclusion	kcl	late	2.41761	0.803861	2.11229	3ssExonicRegion	Exclusion	shuffle	late
AGGGGG	4.61737	1.65841	2.98769	3ssExonicRegion	Exclusion	kcl	late	0.961647	0.27437	1.36893	3ssExonicRegion	Exclusion	shuffle	late
GGTGGC	4.4973	1.63334	2.39505	3ssExonicRegion	Exclusion	kcl	late	1.73576	0.436595	1.46137	3ssExonicRegion	Exclusion	shuffle	late
GGAGCA	4.49092	1.87621	2.06201	3ssExonicRegion	Exclusion	kcl	late	0.54394	0.101146	1.08811	3ssExonicRegion	Exclusion	shuffle	late
TGCTCT	4.31398	1.52355	2.06928	3ssExonicRegion	Exclusion	kcl	late	-1.33329	0.471803	0.725254	3ssExonicRegion	Exclusion	shuffle	late
CACAGC	4.27533	1.84626	2.12943	3ssExonicRegion	Exclusion	kcl	late	-0.659387	0.113267	0.88511	3ssExonicRegion	Exclusion	shuffle	late
TGTGCG	4.2124	1.47122	2.81882	3ssExonicRegion	Exclusion	kcl	late	2.1277	0.700415	1.84846	3ssExonicRegion	Exclusion	shuffle	late
GAGCCC	4.20614	1.73476	2.23077	3ssExonicRegion	Exclusion	kcl	late	0.100153	0	1.05021	3ssExonicRegion	Exclusion	shuffle	late
TACCTC	4.1833	1.31687	3.22679	3ssExonicRegion	Exclusion	kcl	late	-1.53957	0.478099	0.569569	3ssExonicRegion	Exclusion	shuffle	late
GAGGTC	4.1833	1.31687	3.22679	3ssExonicRegion	Exclusion	kcl	late	-1.95784	0.776413	0.480972	3ssExonicRegion	Exclusion	shuffle	late
GCTTGC	4.1833	1.31687	3.22679	3ssExonicRegion	Exclusion	kcl	late	1.40336	0.429445	1.58104	3ssExonicRegion	Exclusion	shuffle	late
AGACAA	4.09616	1.64733	2.24767	3ssExonicRegion	Exclusion	kcl	late	-0.886949	0.186171	0.835897	3ssExonicRegion	Exclusion	shuffle	late
GGGACT	4.08461	1.54728	2.43689	3ssExonicRegion	Exclusion	kcl	late	-0.210843	0	0.97891	3ssExonicRegion	Exclusion	shuffle	late
GGCTGG	4.02732	1.90881	2.20458	3ssExonicRegion	Exclusion	kcl	late	1.93282	0.618206	1.42847	3ssExonicRegion	Exclusion	shuffle	late
TACAGC	3.98736	1.4612	2.48972	3ssExonicRegion	Exclusion	kcl	late	-0.537227	0.0762625	0.886447	3ssExonicRegion	Exclusion	shuffle	late
CAACCA	3.98736	1.55193	2.70314	3ssExonicRegion	Exclusion	kcl	late	-1.72882	0.51166	0.625977	3ssExonicRegion	Exclusion	shuffle	late
GCCTCC	3.9074	1.61231	2.06667	3ssExonicRegion	Exclusion	kcl	late	1.67317	0.60211	1.41092	3ssExonicRegion	Exclusion	shuffle	late
GGCCTG	3.90317	1.50944	1.94118	3ssExonicRegion	Exclusion	kcl	late	0.764309	0.247401	1.19121	3ssExonicRegion	Exclusion	shuffle	late
CTGTGC	3.90317	1.70062	2.06465	3ssExonicRegion	Exclusion	kcl	late	2.67709	0.847185	1.56261	3ssExonicRegion	Exclusion	shuffle	late
TCCATT	3.89383	1.37521	2.55824	3ssExonicRegion	Exclusion	kcl	late	-2.64885	1.28034	0.437042	3ssExonicRegion	Exclusion	shuffle	late
CTGTGG	3.87383	1.55342	1.69681	3ssExonicRegion	Exclusion	kcl	late	2.22715	1.06711	1.5603	3ssExonicRegion	Exclusion	shuffle	late
GGCTTC	3.8699	1.4714	2.29289	3ssExonicRegion	Exclusion	kcl	late	0.590301	0.146432	1.20243	3ssExonicRegion	Exclusion	shuffle	late
CCAGCT	3.83698	1.55585	1.822	3ssExonicRegion	Exclusion	kcl	late	-0.495328	0.151153	0.89602	3ssExonicRegion	Exclusion	shuffle	late
CTGGGC	3.80979	1.49362	2.16219	3ssExonicRegion	Exclusion	kcl	late	-0.757742	0.19633	0.855689	3ssExonicRegion	Exclusion	shuffle	late
TGTGCA	3.80979	1.49362	2.16219	3ssExonicRegion	Exclusion	kcl	late	1.95925	0.634337	1.58663	3ssExonicRegion	Exclusion	shuffle	late
GCCTGT	3.75394	1.3828	2.32373	3ssExonicRegion	Exclusion	kcl	late	-0.400002	0.0633209	0.931442	3ssExonicRegion	Exclusion	shuffle	late
GCAGCA	3.66707	1.39688	1.74096	3ssExonicRegion	Exclusion	kcl	late	0.724421	0.0977914	1.08588	3ssExonicRegion	Exclusion	shuffle	late
TGTGGG	3.65586	1.43427	2.07262	3ssExonicRegion	Exclusion	kcl	late	1.95925	0.634337	1.58663	3ssExonicRegion	Exclusion	shuffle	late
GACTGT	3.63663	1.37521	2.55824	3ssExonicRegion	Exclusion	kcl	late	3.57637	1.16245	2.25173	3ssExonicRegion	Exclusion	shuffle	late
TCAGTC	3.5562	1.31424	2.19094	3ssExonicRegion	Exclusion	kcl	late	1.79276	0.568918	1.58475	3ssExonicRegion	Exclusion	shuffle	late
GCAGAG	3.53128	1.42077	1.93549	3ssExonicRegion	Exclusion	kcl	late	1.77323	0.654055	1.46945	3ssExonicRegion	Exclusion	shuffle	late
CCTTGG	3.52341	1.34436	2.07688	3ssExonicRegion	Exclusion	kcl	late	-2.22648	1.04626	0.541636	3ssExonicRegion	Exclusion	shuffle	late
GGTTCT	3.52341	1.34436	2.07688	3ssExonicRegion	Exclusion	kcl	late	-0.641472	0.137489	0.872299	3ssExonicRegion	Exclusion	shuffle	late
ACACAG	3.51857	1.38053	1.99585	3ssExonicRegion	Exclusion	kcl	late	-1.50167	0.456767	0.708243	3ssExonicRegion	Exclusion	shuffle	late
GAGCAG	3.44807	1.38684	1.67018	3ssExonicRegion	Exclusion	kcl	late	0.717047	0.20129	1.14744	3ssExonicRegion	Exclusion	shuffle	late
ACAGCA	3.42194	1.37559	1.88039	3ssExonicRegion	Exclusion	kcl	late	3.05532	1.27264	1.81446	3ssExonicRegion	Exclusion	shuffle	late
TCTGGA	3.41393	1.43188	1.77459	3ssExonicRegion	Exclusion	kcl	late	0.948063	0.301348	1.21739	3ssExonicRegion	Exclusion	shuffle	late
AGGAGC	3.41393	1.4692	1.81142	3ssExonicRegion	Exclusion	kcl	late	-1.03796	0.159637	0.881896	3ssExonicRegion	Exclusion	shuffle	late
CAGCCT	3.32173	1.33387	1.83142	3ssExonicRegion	Exclusion	kcl	late	-1.32707	0.398521	0.763954	3ssExonicRegion	Exclusion	shuffle	late
CTCAGC	3.18132	1.42077	1.93549	3ssExonicRegion	Exclusion	kcl	late	0.339761	0.0531571	1.05043	3ssExonicRegion	Exclusion	shuffle	late
ACAAAG	3.03524	1.33162	1.92932	3ssExonicRegion	Exclusion	kcl	late	2.55838	1.18048	1.79286	3ssExonicRegion	Exclusion	shuffle	late
CAGGAG	2.87523	1.30369	1.65559	3ssExonicRegion	Exclusion	kcl	late	-2.53945	1.18006	0.624156	3ssExonicRegion	Exclusion	shuffle	late
GGGGTA	9.23447	5.05796	2.67119	3ssIntronicRegion	Exclusion	kcl	early	-0.280656	0.0376094	1.03364	3ssIntronicRegion	Exclusion	shuffle	early
ACGCGT	8.15176	1.65959	8.47387	3ssIntronicRegion	Exclusion	kcl	early	0.645037	0	1.18905	3ssIntronicRegion	Exclusion	shuffle	early
CCTCCT	7.6293	3.20213	1.46667	3ssIntronicRegion	Exclusion	kcl	early	0.382026	0.539337	1.12655	3ssIntronicRegion	Exclusion	shuffle	early
GGGGTG	7.55557	3.64432	1.63233	3ssIntronicRegion	Exclusion	kcl	early	-1.54677	0	1.00584	3ssIntronicRegion	Exclusion	shuffle	early
GTGGGG	7.53328	3.35114	1.55677	3ssIntronicRegion	Exclusion	kcl	early	0.500206	0.241475	1.07746	3ssIntronicRegion	Exclusion	shuffle	early
TGGGGT	7.46692	2.73813	1.49849	3ssIntronicRegion	Exclusion	kcl	early	-1.853	0.218919	0.932018	3ssIntronicRegion	Exclusion	shuffle	early
TGGGGG	7.41892	3.89095	1.60656	3ssIntronicRegion	Exclusion	kcl	early	-0.464745	0.0444964	0.980999	3ssIntronicRegion	Exclusion	shuffle	early
GGGCTG	7.33423	3.30308	1.54301	3ssIntronicRegion	Exclusion	kcl	early	1.69188	0.762141	1.1889	3ssIntronicRegion	Exclusion	shuffle	early
CCAGTC	7.25963	4.58894	2.06152	3ssIntronicRegion	Exclusion	kcl	early	-1.20797	0.293303	0.886897	3ssIntronicRegion	Exclusion	shuffle	early
GGGAGG	7.17641	3.50105	1.52857	3ssIntronicRegion	Exclusion	kcl	early	-0.648976	0.283672	0.922883	3ssIntronicRegion	Exclusion	shuffle	early
TTGGGG	7.03254	3.24684	1.57645	3ssIntronicRegion	Exclusion	kcl	early	-1.8385	0.409559	0.889706	3ssIntronicRegion	Exclusion	shuffle	early
ACGTCC	6.9488	1.69423	2.70125	3ssIntronicRegion	Exclusion	kcl	early	0.86034	0.155262	1.2408	3ssIntronicRegion	Exclusion	shuffle	early
GGGGCT	6.94803	3.7734	1.65972	3ssIntronicRegion	Exclusion	kcl	early	0.343882	0.101819	1.04222	3ssIntronicRegion	Exclusion	shuffle	early
AGGGCC	6.8339	3.32958	1.74445	3ssIntronicRegion	Exclusion	kcl	early	1.52122	0.316278	1.11794	3ssIntronicRegion	Exclusion	shuffle	early
CAGGAG	6.66201	3.91359	1.67447	3ssIntronicRegion	Exclusion	kcl	early	1.56031	0.445668	1.1349	3ssIntronicRegion	Exclusion	shuffle	early
AGTTCG	6.58332	2.63681	3.53058	3ssIntronicRegion	Exclusion	kcl	early	-0.164507	0	0.989871	3ssIntronicRegion	Exclusion	shuffle	early
GGGAAG	6.55033	3.71578	1.66163	3ssIntronicRegion	Exclusion	kcl	early	0.101269	0.0492919	0.979777	3ssIntronicRegion	Exclusion	shuffle	early
GTGGCT	6.41423	1.79026	1.38049	3ssIntronicRegion	Exclusion	kcl	early	-0.884348	0.190792	1.06921	3ssIntronicRegion	Exclusion	shuffle	early
GGGGGT	6.37222	3.32771	1.70531	3ssIntronicRegion	Exclusion	kcl	early	-1.44259	0.116509	0.945686	3ssIntronicRegion	Exclusion	shuffle	early
GTGGCC	6.26409	3.24728	1.67659	3ssIntronicRegion	Exclusion	kcl	early	0.0359733	0.0537015	0.978408	3ssIntronicRegion	Exclusion	shuffle	early
GGATGG	6.25042	2.01335	1.47697	3ssIntronicRegion	Exclusion	kcl	early	-0.966774	0.25307	0.917201	3ssIntronicRegion	Exclusion	shuffle	early
GGGGCA	6.20237	2.2944	1.54769	3ssIntronicRegion	Exclusion	kcl	early	-2.24482	1.03098	0.764877	3ssIntronicRegion	Exclusion	shuffle	early
GCCTGA	6.18848	3.64691	1.79908	3ssIntronicRegion	Exclusion	kcl	early	-0.0482981	0.0864365	1.03622	3ssIntronicRegion	Exclusion	shuffle	early
GGTGGG	6.1884	1.9424	1.35398	3ssIntronicRegion	Exclusion	kcl	early	0.433224	0.256762	1.07523	3ssIntronicRegion	Exclusion	shuffle	early
GGGTGG	6.1563	2.68568	1.43733	3ssIntronicRegion	Exclusion	kcl	early	-0.248654	0.577717	1.14272	3ssIntronicRegion	Exclusion	shuffle	early
GTCCCC	6.10245	2.86384	1.59674	3ssIntronicRegion	Exclusion	kcl	early	-1.58088	0.363085	0.893084	3ssIntronicRegion	Exclusion	shuffle	early
GCCAGG	6.09454	3.7968	1.66662	3ssIntronicRegion	Exclusion	kcl	early	-1.64022	0.451984	0.881572	3ssIntronicRegion	Exclusion	shuffle	early
CTCCCG	6.01237	2.73107	2.06262	3ssIntronicRegion	Exclusion	kcl	early	-1.27853	0.509665	0.784991	3ssIntronicRegion	Exclusion	shuffle	early
TGACTC	6.00294	3.12863	1.64717	3ssIntronicRegion	Exclusion	kcl	early	-2.20397	0.865937	0.807552	3ssIntronicRegion	Exclusion	shuffle	early
CTGACC	5.91982	3.14097	1.62887	3ssIntronicRegion	Exclusion	kcl	early	1.52398	0.988819	1.27305	3ssIntronicRegion	Exclusion	shuffle	early
GGCTGG	5.88714	1.87388	1.34574	3ssIntronicRegion	Exclusion	kcl	early	-0.958054	0.199712	1.06215	3ssIntronicRegion	Exclusion	shuffle	early
GGGCGG	5.81579	2.28064	1.83515	3ssIntronicRegion	Exclusion	kcl	early	1.61286	0.165716	0.90994	3ssIntronicRegion	Exclusion	shuffle	early
TGTGAC	5.78961	2.40873	1.53756	3ssIntronicRegion	Exclusion	kcl	early	-1.73497	0.174029	0.939995	3ssIntronicRegion	Exclusion	shuffle	early
CCCAGC	5.73596	3.04864	1.50278	3ssIntronicRegion	Exclusion	kcl	early	1.65735	0.99485	1.22467	3ssIntronicRegion	Exclusion	shuffle	early
GGGGGC	5.70212	2.16319	1.54186	3ssIntronicRegion	Exclusion	kcl	early	-1.65135	0.79247	0.794943	3ssIntronicRegion	Exclusion	shuffle	early
GAGGAG	5.66498	2.47603	1.47387	3ssIntronicRegion	Exclusion	kcl	early	0.458734	0.128342	1.04948	3ssIntronicRegion	Exclusion	shuffle	early
AGGAGA	5.648	2.88589	1.55428	3ssIntronicRegion	Exclusion	kcl	early	0.718443	0.134954	1.05549	3ssIntronicRegion	Exclusion	shuffle	early
TGTGGC	5.63503	3.96863	1.65222	3ssIntronicRegion	Exclusion	kcl	early	-0.645811	0.071417	0.972592	3ssIntronicRegion	Exclusion	shuffle	early
CTCCTC	5.54924	1.33359	1.25998	3ssIntronicRegion	Exclusion	kcl	early	1.93359	0.608762	1.14616	3ssIntronicRegion	Exclusion	shuffle	early
GGAGGG	5.54453	2.84478	1.49062	3ssIntronicRegion	Exclusion	kcl	early	-0.245778	0.272464	0.921881	3ssIntronicRegion	Exclusion	shuffle	early
ACTCTG	5.51628	2.918	1.53824	3ssIntronicRegion	Exclusion	kcl	early	0.335729	0.0472776	0.980329	3ssIntronicRegion	Exclusion	shuffle	early
ATGGGA	5.48074	2.62368	1.60898	3ssIntronicRegion	Exclusion	kcl	early	-0.647668	0.153459	0.932915	3ssIntronicRegion	Exclusion	shuffle	early
GGCTGA	5.46481	3.39364	1.67153	3ssIntronicRegion	Exclusion	kcl	early	0.886085	0.174026	1.07221	3ssIntronicRegion	Exclusion	shuffle	early
GGGTAT	5.46116	2.99111	1.9322	3ssIntronicRegion	Exclusion	kcl	early	1.51456	0.542657	1.24119	3ssIntronicRegion	Exclusion	shuffle	early
GGGTAG	5.41002	2.33494	1.67874	3ssIntronicRegion	Exclusion	kcl	early	-1.21385	0.28708	0.876923	3ssIntronicRegion	Exclusion	shuffle	early
GGAGGA	5.40534	2.29615	1.44816	3ssIntronicRegion	Exclusion	kcl	early	-2.15365	0.534865	0.867633	3ssIntronicRegion	Exclusion	shuffle	early
TGAGGA	5.39824	3.58997	1.64281	3ssIntronicRegion	Exclusion	kcl	early	-0.245066	0.0237914	0.98873	3ssIntronicRegion	Exclusion	shuffle	early
GCTGGG	5.38184	2.10476	1.35638	3ssIntronicRegion	Exclusion	kcl	early	-2.06537	0.248119	0.930804	3ssIntronicRegion	Exclusion	shuffle	early
AGGAGT	5.37641	2.41041	1.65179	3ssIntronicRegion	Exclusion	kcl	early	-0.366722	0.400392	0.857195	3ssIntronicRegion	Exclusion	shuffle	early
CCCACG	5.36372	2.19778	2.15982	3ssIntronicRegion	Exclusion	kcl	early	-1.63569	0.612248	0.729049	3ssIntronicRegion	Exclusion	shuffle	early
GCCCCC	5.33195	2.66773	1.62723	3ssIntronicRegion	Exclusion	kcl	early	-1.66425	0.27262	0.897784	3ssIntronicRegion	Exclusion	shuffle	early
AGGCGG	5.25147	1.69024	1.8254	3ssIntronicRegion	Exclusion	kcl	early	0.176351	0.0447194	1.05166	3ssIntronicRegion	Exclusion	shuffle	early
CCCCAG	5.24027	2.65821	1.45101	3ssIntronicRegion	Exclusion	kcl	early	1.11654	0.202788	1.06422	3ssIntronicRegion	Exclusion	shuffle	early
GAGATG	5.23969	2.59488	1.57388	3ssIntronicRegion	Exclusion	kcl	early	0.235001	0.115336	1.05654	3ssIntronicRegion	Exclusion	shuffle	early
CCGGGG	5.21778	2.24206	1.95016	3ssIntronicRegion	Exclusion	kcl	early	0.324265	0.312432	1.19547	3ssIntronicRegion	Exclusion	shuffle	early
TCCTCC	5.19524	1.74005	1.32932	3ssIntronicRegion	Exclusion	kcl	early	-0.108051	0.171192	1.0547	3ssIntronicRegion	Exclusion	shuffle	early
ACCGAT	5.18705	1.65872	4.08681	3ssIntronicRegion	Exclusion	kcl	early	-1.68332	0.631022	0.537492	3ssIntronicRegion	Exclusion	shuffle	early
TGACCC	5.18289	2.93567	1.63304	3ssIntronicRegion	Exclusion	kcl	early	-0.249137	0.0855411	1.03528	3ssIntronicRegion	Exclusion	shuffle	early
CTGGGG	5.18187	1.49402	1.285	3ssIntronicRegion	Exclusion	kcl	early	0.0285656	0.420836	1.11085	3ssIntronicRegion	Exclusion	shuffle	early
TGGCTG	5.16991	1.45322	1.27663	3ssIntronicRegion	Exclusion	kcl	early	-2.28092	0.217862	0.937311	3ssIntronicRegion	Exclusion	shuffle	early
GACCCC	5.11796	2.82755	1.75228	3ssIntronicRegion	Exclusion	kcl	early	0.896963	0.513623	1.19637	3ssIntronicRegion	Exclusion	shuffle	early
TCGTGC	5.1165	1.84554	2.63302	3ssIntronicRegion	Exclusion	kcl	early	0.86034	0.1388	1.19114	3ssIntronicRegion	Exclusion	shuffle	early
CCGTAT	5.1165	1.67549	2.52543	3ssIntronicRegion	Exclusion	kcl	early	2.22287	0.763984	1.68917	3ssIntronicRegion	Exclusion	shuffle	early
GCAGAG	5.03804	2.54438	1.44711	3ssIntronicRegion	Exclusion	kcl	early	0.6904	0.204718	1.06553	3ssIntronicRegion	Exclusion	shuffle	early
GATGGA	5.03527	2.47185	1.63632	3ssIntronicRegion	Exclusion	kcl	early	1.18124	0.431498	1.16114	3ssIntronicRegion	Exclusion	shuffle	early
ACCCCC	5.028	1.51517	1.42657	3ssIntronicRegion	Exclusion	kcl	early	0.364605	0.202008	1.08432	3ssIntronicRegion	Exclusion	shuffle	early
AGTGGC	5.00967	2.36998	1.61887	3ssIntronicRegion	Exclusion	kcl	early	-0.0376685	0	0.989237	3ssIntronicRegion	Exclusion	shuffle	early
CACGTG	4.99758	2.16008	1.80524	3ssIntronicRegion	Exclusion	kcl	early	-1.08932	0.21628	0.890139	3ssIntronicRegion	Exclusion	shuffle	early
GGTAGG	4.8607	2.41723	1.64103	3ssIntronicRegion	Exclusion	kcl	early	0.186123	0.0610989	1.03083	3ssIntronicRegion	Exclusion	shuffle	early
GAGGTG	4.85723	2.17908	1.47004	3ssIntronicRegion	Exclusion	kcl	early	-1.36275	0.170154	0.941794	3ssIntronicRegion	Exclusion	shuffle	early
GAGGGG	4.7966	2.47169	1.51815	3ssIntronicRegion	Exclusion	kcl	early	0.729624	0.108564	1.0492	3ssIntronicRegion	Exclusion	shuffle	early
ACCGCT	4.79418	1.67549	2.52543	3ssIntronicRegion	Exclusion	kcl	early	0.361357	0.149162	1.2217	3ssIntronicRegion	Exclusion	shuffle	early
CATGAT	4.78957	1.4811	1.51475	3ssIntronicRegion	Exclusion	kcl	early	0.479476	0.0699514	0.955158	3ssIntronicRegion	Exclusion	shuffle	early
GCGGAA	4.76689	1.76536	2.60215	3ssIntronicRegion	Exclusion	kcl	early	0.970573	0.244716	1.32474	3ssIntronicRegion	Exclusion	shuffle	early
GATCTC	4.75754	2.29045	1.7916	3ssIntronicRegion	Exclusion	kcl	early	0.694712	0.257455	1.13564	3ssIntronicRegion	Exclusion	shuffle	early
GAGGAC	4.72021	2.6268	1.67708	3ssIntronicRegion	Exclusion	kcl	early	2.05375	0.664957	1.23139	3ssIntronicRegion	Exclusion	shuffle	early
TGGGGC	4.67126	1.36365	1.32314	3ssIntronicRegion	Exclusion	kcl	early	1.31396	1.11773	1.28386	3ssIntronicRegion	Exclusion	shuffle	early
CCCCCG	4.66955	1.89968	1.87001	3ssIntronicRegion	Exclusion	kcl	early	-1.68927	0.135581	0.914634	3ssIntronicRegion	Exclusion	shuffle	early
GTTGCA	4.66628	2.14904	1.68925	3ssIntronicRegion	Exclusion	kcl	early	-0.883161	0.193529	0.906526	3ssIntronicRegion	Exclusion	shuffle	early
CCACCC	4.65602	2.19199	1.42147	3ssIntronicRegion	Exclusion	kcl	early	0.931057	0.470995	1.13589	3ssIntronicRegion	Exclusion	shuffle	early
CCTGCA	4.6544	2.66717	1.47659	3ssIntronicRegion	Exclusion	kcl	early	-1.11584	0.349018	0.905038	3ssIntronicRegion	Exclusion	shuffle	early
GATGGG	4.64164	1.40677	1.38541	3ssIntronicRegion	Exclusion	kcl	early	-0.152415	0	0.989076	3ssIntronicRegion	Exclusion	shuffle	early
GCGGGG	4.62858	1.36195	1.57889	3ssIntronicRegion	Exclusion	kcl	early	1.68752	0.226776	0.882299	3ssIntronicRegion	Exclusion	shuffle	early
CGTGCT	4.61488	2.11484	2.11698	3ssIntronicRegion	Exclusion	kcl	early	0.809598	0.223145	1.17854	3ssIntronicRegion	Exclusion	shuffle	early
GGGACT	4.60999	2.03782	1.51132	3ssIntronicRegion	Exclusion	kcl	early	-0.749937	0.120944	0.942819	3ssIntronicRegion	Exclusion	shuffle	early
GGTGAC	4.58078	2.10557	1.52751	3ssIntronicRegion	Exclusion	kcl	early	-0.565146	0	1.00195	3ssIntronicRegion	Exclusion	shuffle	early
CAGGGA	4.57929	2.82747	1.52746	3ssIntronicRegion	Exclusion	kcl	early	-0.0778134	0	1.00609	3ssIntronicRegion	Exclusion	shuffle	early
CCCGTG	4.57532	1.94611	1.78386	3ssIntronicRegion	Exclusion	kcl	early	-0.293407	0.0411977	1.04236	3ssIntronicRegion	Exclusion	shuffle	early
GAACAG	4.57185	2.02142	1.50392	3ssIntronicRegion	Exclusion	kcl	early	-1.44379	0.194455	0.919142	3ssIntronicRegion	Exclusion	shuffle	early
GGAGAT	4.56718	1.7557	1.52555	3ssIntronicRegion	Exclusion	kcl	early	-2.0256	0.834223	0.77128	3ssIntronicRegion	Exclusion	shuffle	early
TGGGGA	4.5647	2.55663	1.45861	3ssIntronicRegion	Exclusion	kcl	early	1.77329	0.422846	1.12267	3ssIntronicRegion	Exclusion	shuffle	early
CTACCT	4.54043	2.10557	1.52751	3ssIntronicRegion	Exclusion	kcl	early	0.3676	0	1.00111	3ssIntronicRegion	Exclusion	shuffle	early
GTGACG	4.53045	1.61072	1.9543	3ssIntronicRegion	Exclusion	kcl	early	0.426607	0.232433	1.19328	3ssIntronicRegion	Exclusion	shuffle	early
CCAGGG	4.51986	2.37493	1.44925	3ssIntronicRegion	Exclusion	kcl	early	0.0770302	0.0228372	1.0134	3ssIntronicRegion	Exclusion	shuffle	early
CCCCCT	4.49623	1.66431	1.35732	3ssIntronicRegion	Exclusion	kcl	early	1.47899	0.583834	1.16796	3ssIntronicRegion	Exclusion	shuffle	early
TGCCGG	4.47186	1.67549	2.52543	3ssIntronicRegion	Exclusion	kcl	early	-0.628887	0.219526	0.8226	3ssIntronicRegion	Exclusion	shuffle	early
GGACAC	4.46279	1.71071	1.58372	3ssIntronicRegion	Exclusion	kcl	early	0.376358	0.0341385	0.971751	3ssIntronicRegion	Exclusion	shuffle	early
GGGATG	4.43971	2.22838	1.51109	3ssIntronicRegion	Exclusion	kcl	early	2.79633	1.1775	1.32452	3ssIntronicRegion	Exclusion	shuffle	early
GTCCAC	4.43758	2.12559	1.69236	3ssIntronicRegion	Exclusion	kcl	early	-0.0134824	0.0714063	1.04549	3ssIntronicRegion	Exclusion	shuffle	early
GGCAGG	4.43004	1.42228	1.30378	3ssIntronicRegion	Exclusion	kcl	early	-0.472493	0.125646	1.04708	3ssIntronicRegion	Exclusion	shuffle	early
CGGTTC	4.42502	1.42703	2.36136	3ssIntronicRegion	Exclusion	kcl	early	0.627287	0	1.06157	3ssIntronicRegion	Exclusion	shuffle	early
CCGACA	4.42502	1.42703	2.36136	3ssIntronicRegion	Exclusion	kcl	early	-0.413262	0	1.06157	3ssIntronicRegion	Exclusion	shuffle	early
GCCACT	4.40049	2.01865	1.56934	3ssIntronicRegion	Exclusion	kcl	early	-0.254822	0.0614865	1.03134	3ssIntronicRegion	Exclusion	shuffle	early
AGGGGC	4.38815	2.14547	1.53385	3ssIntronicRegion	Exclusion	kcl	early	1.18573	0.353088	1.12644	3ssIntronicRegion	Exclusion	shuffle	early
CCACCG	4.38696	1.69498	1.95287	3ssIntronicRegion	Exclusion	kcl	early	-0.523199	0.107695	0.914749	3ssIntronicRegion	Exclusion	shuffle	early
ACGGAG	4.37279	1.76707	2.29246	3ssIntronicRegion	Exclusion	kcl	early	2.91564	1.06774	1.80167	3ssIntronicRegion	Exclusion	shuffle	early
GTGGGC	4.35689	1.64027	1.42702	3ssIntronicRegion	Exclusion	kcl	early	2.23814	1.03832	1.29939	3ssIntronicRegion	Exclusion	shuffle	early
GGTCCC	4.35272	2.40797	1.57048	3ssIntronicRegion	Exclusion	kcl	early	0.155608	0.0878397	1.03769	3ssIntronicRegion	Exclusion	shuffle	early
GCTCCC	4.33638	1.31679	1.33084	3ssIntronicRegion	Exclusion	kcl	early	-1.12863	0.450346	0.875032	3ssIntronicRegion	Exclusion	shuffle	early
TATGGG	4.32674	2.42152	1.72449	3ssIntronicRegion	Exclusion	kcl	early	0.742448	0.190715	1.09638	3ssIntronicRegion	Exclusion	shuffle	early
TTTGGG	4.32412	2.03544	1.41885	3ssIntronicRegion	Exclusion	kcl	early	-2.53382	0.935236	0.811155	3ssIntronicRegion	Exclusion	shuffle	early
GCTTCC	4.32412	2.12463	1.43337	3ssIntronicRegion	Exclusion	kcl	early	-1.06844	0.130373	0.954551	3ssIntronicRegion	Exclusion	shuffle	early
ATGGGG	4.2975	1.7102	1.41379	3ssIntronicRegion	Exclusion	kcl	early	2.06196	1.04605	1.29905	3ssIntronicRegion	Exclusion	shuffle	early
GGGTCG	4.29596	1.52593	2.23823	3ssIntronicRegion	Exclusion	kcl	early	0.561957	0.211167	1.24191	3ssIntronicRegion	Exclusion	shuffle	early
CAGTCT	4.27986	2.05417	1.44253	3ssIntronicRegion	Exclusion	kcl	early	0.387217	0.137828	1.05818	3ssIntronicRegion	Exclusion	shuffle	early
GTTTCC	4.27969	2.53487	1.4932	3ssIntronicRegion	Exclusion	kcl	early	0.100018	0	1.00635	3ssIntronicRegion	Exclusion	shuffle	early
ACCCAT	4.27562	1.74516	1.5663	3ssIntronicRegion	Exclusion	kcl	early	-0.7381	0.236975	0.892898	3ssIntronicRegion	Exclusion	shuffle	early
TCTGAG	4.24491	2.37493	1.44925	3ssIntronicRegion	Exclusion	kcl	early	2.31512	0.852253	1.21449	3ssIntronicRegion	Exclusion	shuffle	early
AGGGGG	4.23907	2.2945	1.57414	3ssIntronicRegion	Exclusion	kcl	early	-2.00519	0.366972	0.872954	3ssIntronicRegion	Exclusion	shuffle	early
GCCTGC	4.23471	1.93804	1.428	3ssIntronicRegion	Exclusion	kcl	early	0.673834	0.229356	1.08292	3ssIntronicRegion	Exclusion	shuffle	early
CTGTCT	4.23331	2.1647	1.31544	3ssIntronicRegion	Exclusion	kcl	early	-1.03073	0.262478	0.938295	3ssIntronicRegion	Exclusion	shuffle	early
GCCGGG	4.20989	1.48381	1.77737	3ssIntronicRegion	Exclusion	kcl	early	1.84699	0.56129	1.33208	3ssIntronicRegion	Exclusion	shuffle	early
TACCAC	4.20419	1.67928	1.57998	3ssIntronicRegion	Exclusion	kcl	early	0.257354	0.156527	1.08805	3ssIntronicRegion	Exclusion	shuffle	early
TCCACT	4.20379	1.86214	1.48191	3ssIntronicRegion	Exclusion	kcl	early	-0.24849	0.0267725	0.977977	3ssIntronicRegion	Exclusion	shuffle	early
TCACGT	4.20321	2.01698	2.2191	3ssIntronicRegion	Exclusion	kcl	early	0.0464157	0	1.0288	3ssIntronicRegion	Exclusion	shuffle	early
CCTTGT	4.19372	2.14777	1.43139	3ssIntronicRegion	Exclusion	kcl	early	0.16844	0.25228	1.08462	3ssIntronicRegion	Exclusion	shuffle	early
TCACAG	4.18363	1.71712	1.38709	3ssIntronicRegion	Exclusion	kcl	early	1.21335	0.167892	1.0669	3ssIntronicRegion	Exclusion	shuffle	early
TCGCCA	4.1826	1.54965	2.1141	3ssIntronicRegion	Exclusion	kcl	early	-0.156113	0	0.989834	3ssIntronicRegion	Exclusion	shuffle	early
CTGCTG	4.16825	2.3702	1.36849	3ssIntronicRegion	Exclusion	kcl	early	-0.316243	0.127598	1.04112	3ssIntronicRegion	Exclusion	shuffle	early
GGCGGA	4.15905	1.34647	1.83929	3ssIntronicRegion	Exclusion	kcl	early	-0.523199	0.175913	0.873138	3ssIntronicRegion	Exclusion	shuffle	early
CGAGTC	4.14954	1.34831	2.20382	3ssIntronicRegion	Exclusion	kcl	early	-1.12734	0.585541	0.636976	3ssIntronicRegion	Exclusion	shuffle	early
CGCACC	4.14954	1.34902	2.31083	3ssIntronicRegion	Exclusion	kcl	early	-1.29924	0.317266	0.767055	3ssIntronicRegion	Exclusion	shuffle	early
CCACGG	4.13178	1.47294	1.80327	3ssIntronicRegion	Exclusion	kcl	early	0.962233	0.047658	1.05998	3ssIntronicRegion	Exclusion	shuffle	early
TGTTCC	4.12779	1.72602	1.3639	3ssIntronicRegion	Exclusion	kcl	early	0.523018	0.100708	1.0411	3ssIntronicRegion	Exclusion	shuffle	early
AGGGGA	4.11475	2.2856	1.51126	3ssIntronicRegion	Exclusion	kcl	early	1.38	0.286995	1.10891	3ssIntronicRegion	Exclusion	shuffle	early
GACTCA	4.10579	1.82136	1.57477	3ssIntronicRegion	Exclusion	kcl	early	-2.70429	1.2088	0.708392	3ssIntronicRegion	Exclusion	shuffle	early
GGAAGG	4.09378	2.14752	1.42318	3ssIntronicRegion	Exclusion	kcl	early	-0.244801	0.128017	0.955579	3ssIntronicRegion	Exclusion	shuffle	early
TCGATG	4.08315	1.594	2.48165	3ssIntronicRegion	Exclusion	kcl	early	0.970573	0.244716	1.32474	3ssIntronicRegion	Exclusion	shuffle	early
CACTGG	4.07693	1.61421	1.37438	3ssIntronicRegion	Exclusion	kcl	early	1.3824	0.385275	1.12735	3ssIntronicRegion	Exclusion	shuffle	early
CTCAGC	4.06832	2.37812	1.47605	3ssIntronicRegion	Exclusion	kcl	early	1.27351	0.376565	1.1221	3ssIntronicRegion	Exclusion	shuffle	early
AGCCCC	4.05742	1.78552	1.415	3ssIntronicRegion	Exclusion	kcl	early	0.0337658	0.0255909	0.988945	3ssIntronicRegion	Exclusion	shuffle	early
TGTCCC	4.04649	1.55913	1.32502	3ssIntronicRegion	Exclusion	kcl	early	-0.778148	0.150774	0.950302	3ssIntronicRegion	Exclusion	shuffle	early
ACAGGG	4.04324	1.88948	1.43744	3ssIntronicRegion	Exclusion	kcl	early	-1.16658	0.550609	0.855307	3ssIntronicRegion	Exclusion	shuffle	early
CAGGCG	4.0327	1.77845	1.95177	3ssIntronicRegion	Exclusion	kcl	early	-2.29906	1.06167	0.624678	3ssIntronicRegion	Exclusion	shuffle	early
AGGAGG	4.02983	1.36602	1.29735	3ssIntronicRegion	Exclusion	kcl	early	0.369041	0.316598	1.09931	3ssIntronicRegion	Exclusion	shuffle	early
CGCTGT	4.01514	1.81511	1.86679	3ssIntronicRegion	Exclusion	kcl	early	2.67356	0.847811	1.46705	3ssIntronicRegion	Exclusion	shuffle	early
TGCGGT	4.01249	1.63584	2.10027	3ssIntronicRegion	Exclusion	kcl	early	1.28594	0.371048	1.34667	3ssIntronicRegion	Exclusion	shuffle	early
TTCGAG	4.01249	1.63584	2.10027	3ssIntronicRegion	Exclusion	kcl	early	2.25126	0.769386	1.58676	3ssIntronicRegion	Exclusion	shuffle	early
ACAAGG	3.99979	1.92963	1.56755	3ssIntronicRegion	Exclusion	kcl	early	-0.959237	0.269956	0.887108	3ssIntronicRegion	Exclusion	shuffle	early
GGCCCC	3.96136	1.62253	1.4299	3ssIntronicRegion	Exclusion	kcl	early	0.0476953	0.194492	1.07807	3ssIntronicRegion	Exclusion	shuffle	early
AGGACA	3.9582	2.0263	1.45125	3ssIntronicRegion	Exclusion	kcl	early	2.59469	0.918353	1.25648	3ssIntronicRegion	Exclusion	shuffle	early
TGTGCG	3.95703	1.48944	1.65034	3ssIntronicRegion	Exclusion	kcl	early	0.664541	0.0866742	1.07081	3ssIntronicRegion	Exclusion	shuffle	early
GGGGGA	3.95658	1.76253	1.43641	3ssIntronicRegion	Exclusion	kcl	early	0.829696	0.387811	1.133	3ssIntronicRegion	Exclusion	shuffle	early
CTGGAT	3.95015	1.47163	1.3936	3ssIntronicRegion	Exclusion	kcl	early	-0.548153	0.0864548	0.955308	3ssIntronicRegion	Exclusion	shuffle	early
GGCCTG	3.94149	1.64593	1.35031	3ssIntronicRegion	Exclusion	kcl	early	1.75255	0.184492	1.06444	3ssIntronicRegion	Exclusion	shuffle	early
GGGCCC	3.94	2.68209	1.64457	3ssIntronicRegion	Exclusion	kcl	early	1.68845	0.639328	1.21652	3ssIntronicRegion	Exclusion	shuffle	early
ATAGTC	3.93359	1.78311	1.69405	3ssIntronicRegion	Exclusion	kcl	early	-0.428574	0.0791574	0.946536	3ssIntronicRegion	Exclusion	shuffle	early
CTCCAC	3.93067	2.13796	1.47451	3ssIntronicRegion	Exclusion	kcl	early	-0.155878	0.31352	0.905733	3ssIntronicRegion	Exclusion	shuffle	early
GGGGGG	3.92317	3.54182	1.94646	3ssIntronicRegion	Exclusion	kcl	early	-3.48095	0.101817	1.05341	3ssIntronicRegion	Exclusion	shuffle	early
CCCGTC	3.91555	1.35008	1.75422	3ssIntronicRegion	Exclusion	kcl	early	1.67729	0.474714	1.34405	3ssIntronicRegion	Exclusion	shuffle	early
GATATC	3.91555	1.7286	1.90164	3ssIntronicRegion	Exclusion	kcl	early	0.0383606	0	1.02483	3ssIntronicRegion	Exclusion	shuffle	early
GTCCAA	3.91427	1.69024	1.8254	3ssIntronicRegion	Exclusion	kcl	early	0.192938	0.0434442	1.04821	3ssIntronicRegion	Exclusion	shuffle	early
CGGGGT	3.91427	1.77197	1.90494	3ssIntronicRegion	Exclusion	kcl	early	1.1259	0.352924	1.24531	3ssIntronicRegion	Exclusion	shuffle	early
CCAGCG	3.91427	1.85772	1.90659	3ssIntronicRegion	Exclusion	kcl	early	-0.143451	0	1.01976	3ssIntronicRegion	Exclusion	shuffle	early
CGTGCC	3.91083	1.51992	1.81503	3ssIntronicRegion	Exclusion	kcl	early	0.223135	0	1.02483	3ssIntronicRegion	Exclusion	shuffle	early
GTGCGG	3.91083	1.97176	2.06218	3ssIntronicRegion	Exclusion	kcl	early	0.223135	0.0502959	1.0679	3ssIntronicRegion	Exclusion	shuffle	early
GCCTCC	3.90124	1.47912	1.31014	3ssIntronicRegion	Exclusion	kcl	early	0.15749	0.0227205	0.988565	3ssIntronicRegion	Exclusion	shuffle	early
CCACTG	3.89785	1.37265	1.3001	3ssIntronicRegion	Exclusion	kcl	early	0.900511	0.0972913	1.03772	3ssIntronicRegion	Exclusion	shuffle	early
CTGCCT	3.87167	2.92003	1.40854	3ssIntronicRegion	Exclusion	kcl	early	0.719314	0.278332	1.07342	3ssIntronicRegion	Exclusion	shuffle	early
GGAAGC	3.86798	1.407	1.36245	3ssIntronicRegion	Exclusion	kcl	early	1.6791	0.624624	1.20409	3ssIntronicRegion	Exclusion	shuffle	early
AGCTGG	3.85605	1.70221	1.37213	3ssIntronicRegion	Exclusion	kcl	early	-0.073167	0.338284	0.902774	3ssIntronicRegion	Exclusion	shuffle	early
GGGCAA	3.85445	1.55874	1.54256	3ssIntronicRegion	Exclusion	kcl	early	1.23858	0.416294	1.19493	3ssIntronicRegion	Exclusion	shuffle	early
GTGCCA	3.85391	2.07735	1.50392	3ssIntronicRegion	Exclusion	kcl	early	-0.0505784	0.0270316	0.977791	3ssIntronicRegion	Exclusion	shuffle	early
ACACAG	3.83821	1.65841	1.34665	3ssIntronicRegion	Exclusion	kcl	early	2.1102	0.573459	1.16285	3ssIntronicRegion	Exclusion	shuffle	early
CATGGG	3.83197	1.87685	1.43219	3ssIntronicRegion	Exclusion	kcl	early	1.08083	0.322855	1.11764	3ssIntronicRegion	Exclusion	shuffle	early
TTGCGG	3.82722	1.34902	2.31083	3ssIntronicRegion	Exclusion	kcl	early	-1.61	0.585541	0.636976	3ssIntronicRegion	Exclusion	shuffle	early
CTGCAC	3.80871	1.87729	1.48913	3ssIntronicRegion	Exclusion	kcl	early	1.34672	0.686254	1.22521	3ssIntronicRegion	Exclusion	shuffle	early
CTGGCG	3.80652	1.31334	1.76251	3ssIntronicRegion	Exclusion	kcl	early	0.390929	0.0468682	1.05769	3ssIntronicRegion	Exclusion	shuffle	early
GGAGTG	3.7791	1.7102	1.41379	3ssIntronicRegion	Exclusion	kcl	early	1.25776	0.383476	1.14207	3ssIntronicRegion	Exclusion	shuffle	early
GACATG	3.77169	1.76647	1.47321	3ssIntronicRegion	Exclusion	kcl	early	1.06302	0.324724	1.12389	3ssIntronicRegion	Exclusion	shuffle	early
GAGCTG	3.76832	2.08243	1.40069	3ssIntronicRegion	Exclusion	kcl	early	-2.18211	0.996569	0.809561	3ssIntronicRegion	Exclusion	shuffle	early
TGCGTC	3.75406	1.49219	2.03069	3ssIntronicRegion	Exclusion	kcl	early	0.561957	0.130292	1.16777	3ssIntronicRegion	Exclusion	shuffle	early
CACTGC	3.7484	1.37676	1.33837	3ssIntronicRegion	Exclusion	kcl	early	0.574752	0.110008	1.05074	3ssIntronicRegion	Exclusion	shuffle	early
GAGAGC	3.74646	1.3121	1.36107	3ssIntronicRegion	Exclusion	kcl	early	-1.56372	0.694528	0.816415	3ssIntronicRegion	Exclusion	shuffle	early
ATCTCG	3.74128	1.42703	2.36136	3ssIntronicRegion	Exclusion	kcl	early	-0.662017	0.144476	0.864545	3ssIntronicRegion	Exclusion	shuffle	early
ATACGT	3.74128	1.42703	2.36136	3ssIntronicRegion	Exclusion	kcl	early	0.416739	0.0767663	1.17205	3ssIntronicRegion	Exclusion	shuffle	early
CTGATG	3.73327	2.26422	1.48209	3ssIntronicRegion	Exclusion	kcl	early	0.980542	0.275889	1.10092	3ssIntronicRegion	Exclusion	shuffle	early
CCATAC	3.70621	1.44011	1.58936	3ssIntronicRegion	Exclusion	kcl	early	-0.141305	0	0.989554	3ssIntronicRegion	Exclusion	shuffle	early
CCCCTC	3.70111	2.74656	1.47712	3ssIntronicRegion	Exclusion	kcl	early	-3.20876	1.18342	0.793957	3ssIntronicRegion	Exclusion	shuffle	early
GCCGTA	3.65954	1.3466	2.42679	3ssIntronicRegion	Exclusion	kcl	early	0.416739	0.0767663	1.17205	3ssIntronicRegion	Exclusion	shuffle	early
ACTGAC	3.65276	1.76253	1.46041	3ssIntronicRegion	Exclusion	kcl	early	-0.45379	0.0878401	0.954354	3ssIntronicRegion	Exclusion	shuffle	early
CGTCCC	3.59551	1.35008	1.75422	3ssIntronicRegion	Exclusion	kcl	early	1.44239	0.167537	1.15243	3ssIntronicRegion	Exclusion	shuffle	early
CAGGGG	3.57173	1.60289	1.4095	3ssIntronicRegion	Exclusion	kcl	early	0.85032	0.187793	1.07263	3ssIntronicRegion	Exclusion	shuffle	early
TAGGAG	3.56171	1.4811	1.51475	3ssIntronicRegion	Exclusion	kcl	early	3.31574	0.568992	1.23453	3ssIntronicRegion	Exclusion	shuffle	early
CTCCCA	3.5588	1.6035	1.3346	3ssIntronicRegion	Exclusion	kcl	early	-0.0896472	0.179457	1.0607	3ssIntronicRegion	Exclusion	shuffle	early
GCCCTC	3.55144	1.93354	1.48939	3ssIntronicRegion	Exclusion	kcl	early	2.20023	0.994926	1.29613	3ssIntronicRegion	Exclusion	shuffle	early
GGTTTC	3.54255	1.43998	1.40278	3ssIntronicRegion	Exclusion	kcl	early	-0.549905	0.120277	0.943255	3ssIntronicRegion	Exclusion	shuffle	early
TGGGAC	3.54053	1.88783	1.50482	3ssIntronicRegion	Exclusion	kcl	early	-1.28936	0.592245	0.822183	3ssIntronicRegion	Exclusion	shuffle	early
ATGGAA	3.53156	1.46045	1.38808	3ssIntronicRegion	Exclusion	kcl	early	-0.0520671	0	0.989033	3ssIntronicRegion	Exclusion	shuffle	early
GGGCCA	3.51713	1.35472	1.35927	3ssIntronicRegion	Exclusion	kcl	early	0.342072	0.152584	1.06063	3ssIntronicRegion	Exclusion	shuffle	early
CCCAGT	3.51306	1.43118	1.36397	3ssIntronicRegion	Exclusion	kcl	early	-0.801064	0.368777	0.890821	3ssIntronicRegion	Exclusion	shuffle	early
CTGAAA	3.51002	1.50795	1.35718	3ssIntronicRegion	Exclusion	kcl	early	-1.64188	0.43679	0.879961	3ssIntronicRegion	Exclusion	shuffle	early
GGTGAG	3.50369	1.64593	1.35031	3ssIntronicRegion	Exclusion	kcl	early	-2.14571	0.807548	0.822993	3ssIntronicRegion	Exclusion	shuffle	early
TCCCAG	3.50339	1.57791	1.29352	3ssIntronicRegion	Exclusion	kcl	early	-0.524866	0.161254	0.950197	3ssIntronicRegion	Exclusion	shuffle	early
AAGGGG	3.50254	1.64027	1.42702	3ssIntronicRegion	Exclusion	kcl	early	1.62554	0.889899	1.26254	3ssIntronicRegion	Exclusion	shuffle	early
CGTCTC	3.49851	1.55814	1.85627	3ssIntronicRegion	Exclusion	kcl	early	0.0334988	0.0468682	1.05769	3ssIntronicRegion	Exclusion	shuffle	early
CCGCTC	3.49847	1.32934	1.62936	3ssIntronicRegion	Exclusion	kcl	early	1.18362	0.531926	1.3018	3ssIntronicRegion	Exclusion	shuffle	early
GTTTGG	3.4954	1.51392	1.39068	3ssIntronicRegion	Exclusion	kcl	early	-1.18326	0.217341	0.926352	3ssIntronicRegion	Exclusion	shuffle	early
CAGAAG	3.49374	1.69259	1.36832	3ssIntronicRegion	Exclusion	kcl	early	-0.831551	0.0484156	0.980023	3ssIntronicRegion	Exclusion	shuffle	early
CTGAGG	3.48705	1.541	1.31007	3ssIntronicRegion	Exclusion	kcl	early	0.6904	0.443552	1.122	3ssIntronicRegion	Exclusion	shuffle	early
AGTCCA	3.47822	1.31184	1.44238	3ssIntronicRegion	Exclusion	kcl	early	0.942991	0.366897	1.15513	3ssIntronicRegion	Exclusion	shuffle	early
CGGAAG	3.47798	1.43956	1.95839	3ssIntronicRegion	Exclusion	kcl	early	1.75614	0.589845	1.42591	3ssIntronicRegion	Exclusion	shuffle	early
CTCCTG	3.47354	1.38382	1.25721	3ssIntronicRegion	Exclusion	kcl	early	-1.97625	0.182227	0.946189	3ssIntronicRegion	Exclusion	shuffle	early
GAGCCG	3.46551	1.56839	1.78408	3ssIntronicRegion	Exclusion	kcl	early	3.42574	0.847811	1.46705	3ssIntronicRegion	Exclusion	shuffle	early
TCTCAC	3.43754	1.57998	1.3686	3ssIntronicRegion	Exclusion	kcl	early	-0.523865	0.174029	0.939995	3ssIntronicRegion	Exclusion	shuffle	early
CTGATC	3.41789	1.42454	1.49474	3ssIntronicRegion	Exclusion	kcl	early	1.88976	0.880073	1.34107	3ssIntronicRegion	Exclusion	shuffle	early
CCATCC	3.41257	1.34478	1.35441	3ssIntronicRegion	Exclusion	kcl	early	0.30773	1.053	1.30227	3ssIntronicRegion	Exclusion	shuffle	early
TCAGCT	3.39036	1.52738	1.36562	3ssIntronicRegion	Exclusion	kcl	early	0.382248	0.0781217	1.03749	3ssIntronicRegion	Exclusion	shuffle	early
GCGGCT	3.39036	1.53335	1.7507	3ssIntronicRegion	Exclusion	kcl	early	-0.918952	0.39802	0.80671	3ssIntronicRegion	Exclusion	shuffle	early
CCCTCT	3.38729	2.91648	1.45944	3ssIntronicRegion	Exclusion	kcl	early	-0.935283	0.412028	0.900238	3ssIntronicRegion	Exclusion	shuffle	early
CTGCAG	3.3593	1.42808	1.26733	3ssIntronicRegion	Exclusion	kcl	early	-1.86003	0.309295	0.918816	3ssIntronicRegion	Exclusion	shuffle	early
CAGAGA	3.35546	1.51049	1.31444	3ssIntronicRegion	Exclusion	kcl	early	2.44711	0.372672	1.10743	3ssIntronicRegion	Exclusion	shuffle	early
GGACAA	3.33691	1.74516	1.5663	3ssIntronicRegion	Exclusion	kcl	early	-0.750763	0.190119	0.908903	3ssIntronicRegion	Exclusion	shuffle	early
GGCCAT	3.33023	1.56903	1.42824	3ssIntronicRegion	Exclusion	kcl	early	0.173137	0.160849	1.06788	3ssIntronicRegion	Exclusion	shuffle	early
CTCACT	3.32726	1.6049	1.37031	3ssIntronicRegion	Exclusion	kcl	early	-2.03712	0.612901	0.850203	3ssIntronicRegion	Exclusion	shuffle	early
AGTGGG	3.3219	1.63244	1.37151	3ssIntronicRegion	Exclusion	kcl	early	-0.245701	0.0244931	0.988821	3ssIntronicRegion	Exclusion	shuffle	early
CCCAGG	3.31635	1.62984	1.32028	3ssIntronicRegion	Exclusion	kcl	early	0.273376	0.0436582	0.981177	3ssIntronicRegion	Exclusion	shuffle	early
TGGGAG	3.27996	1.32903	1.29055	3ssIntronicRegion	Exclusion	kcl	early	-0.245242	0.148852	0.951097	3ssIntronicRegion	Exclusion	shuffle	early
AGGAGC	3.26365	1.5139	1.38088	3ssIntronicRegion	Exclusion	kcl	early	2.46406	1.03252	1.29282	3ssIntronicRegion	Exclusion	shuffle	early
TCTGAT	3.25604	2.19405	1.46722	3ssIntronicRegion	Exclusion	kcl	early	1.08426	0.299504	1.10197	3ssIntronicRegion	Exclusion	shuffle	early
AGCACC	3.2511	1.39088	1.4276	3ssIntronicRegion	Exclusion	kcl	early	0.896963	0.300273	1.12456	3ssIntronicRegion	Exclusion	shuffle	early
CCTGCC	3.2293	1.98122	1.33839	3ssIntronicRegion	Exclusion	kcl	early	-0.703239	0.237725	0.934424	3ssIntronicRegion	Exclusion	shuffle	early
AGGCAC	3.22492	1.3684	1.40221	3ssIntronicRegion	Exclusion	kcl	early	0.293769	0.28743	1.11468	3ssIntronicRegion	Exclusion	shuffle	early
GTCCCT	3.21144	1.36895	1.30725	3ssIntronicRegion	Exclusion	kcl	early	1.42584	0.371633	1.11916	3ssIntronicRegion	Exclusion	shuffle	early
CCAGGT	3.20573	1.40175	1.33032	3ssIntronicRegion	Exclusion	kcl	early	-0.606376	0.278579	0.913238	3ssIntronicRegion	Exclusion	shuffle	early
AGATCT	3.18367	1.36349	1.38844	3ssIntronicRegion	Exclusion	kcl	early	-1.36789	0.418984	0.860197	3ssIntronicRegion	Exclusion	shuffle	early
AGAGCT	3.17257	1.50041	1.32703	3ssIntronicRegion	Exclusion	kcl	early	-1.14466	0.365777	0.898977	3ssIntronicRegion	Exclusion	shuffle	early
CGGGGC	3.17193	1.3195	1.5449	3ssIntronicRegion	Exclusion	kcl	early	-0.141433	0	0.989573	3ssIntronicRegion	Exclusion	shuffle	early
GGTGCG	3.14534	1.43149	1.84396	3ssIntronicRegion	Exclusion	kcl	early	-1.75365	0.578581	0.720432	3ssIntronicRegion	Exclusion	shuffle	early
GGGTCC	3.12978	1.56903	1.42824	3ssIntronicRegion	Exclusion	kcl	early	1.0555	0.202008	1.08432	3ssIntronicRegion	Exclusion	shuffle	early
GGGTGA	3.12859	1.42874	1.39684	3ssIntronicRegion	Exclusion	kcl	early	-2.32881	0.885876	0.776608	3ssIntronicRegion	Exclusion	shuffle	early
TGCCTG	3.12603	1.68072	1.31607	3ssIntronicRegion	Exclusion	kcl	early	0.884418	0.136831	1.04204	3ssIntronicRegion	Exclusion	shuffle	early
GCTTGG	3.1251	1.36808	1.33441	3ssIntronicRegion	Exclusion	kcl	early	-0.78201	0.169412	0.942135	3ssIntronicRegion	Exclusion	shuffle	early
CGGATG	3.12331	1.39116	1.89512	3ssIntronicRegion	Exclusion	kcl	early	3.4579	1.24525	1.82864	3ssIntronicRegion	Exclusion	shuffle	early
TGATAC	3.11495	1.41766	1.57211	3ssIntronicRegion	Exclusion	kcl	early	0.00230381	0	1.01159	3ssIntronicRegion	Exclusion	shuffle	early
CAAGGG	3.10386	1.52888	1.43358	3ssIntronicRegion	Exclusion	kcl	early	-0.677568	0.167053	0.924366	3ssIntronicRegion	Exclusion	shuffle	early
AATGGC	3.08704	1.38168	1.45237	3ssIntronicRegion	Exclusion	kcl	early	-0.143239	0	0.989362	3ssIntronicRegion	Exclusion	shuffle	early
GCAGCA	3.05866	1.77611	1.44242	3ssIntronicRegion	Exclusion	kcl	early	0.718292	0.299498	1.10642	3ssIntronicRegion	Exclusion	shuffle	early
GCTGTC	3.04735	1.4277	1.32383	3ssIntronicRegion	Exclusion	kcl	early	0.0903801	0	1.00571	3ssIntronicRegion	Exclusion	shuffle	early
GAAGGG	3.03876	1.42826	1.3418	3ssIntronicRegion	Exclusion	kcl	early	-0.421393	0	0.998381	3ssIntronicRegion	Exclusion	shuffle	early
GGCCCT	3.03499	1.56716	1.39324	3ssIntronicRegion	Exclusion	kcl	early	2.01866	0.482037	1.15903	3ssIntronicRegion	Exclusion	shuffle	early
CTGGGC	3.02116	1.4028	1.30468	3ssIntronicRegion	Exclusion	kcl	early	0.314737	0.185157	1.06494	3ssIntronicRegion	Exclusion	shuffle	early
TCCAGG	3.00773	1.47919	1.32729	3ssIntronicRegion	Exclusion	kcl	early	1.92031	0.224687	1.07953	3ssIntronicRegion	Exclusion	shuffle	early
CCAGGA	2.97834	1.90362	1.39577	3ssIntronicRegion	Exclusion	kcl	early	-0.91062	0.29721	0.912292	3ssIntronicRegion	Exclusion	shuffle	early
ATGGGC	2.9626	2.07448	1.56672	3ssIntronicRegion	Exclusion	kcl	early	1.70672	0.617114	1.22217	3ssIntronicRegion	Exclusion	shuffle	early
TTTACC	2.9626	1.3684	1.40221	3ssIntronicRegion	Exclusion	kcl	early	-0.147162	0	0.989184	3ssIntronicRegion	Exclusion	shuffle	early
GTCTGC	2.94965	1.33497	1.34967	3ssIntronicRegion	Exclusion	kcl	early	-0.445024	0.149396	0.935378	3ssIntronicRegion	Exclusion	shuffle	early
TCCCAC	2.93685	1.65339	1.38004	3ssIntronicRegion	Exclusion	kcl	early	2.36283	0.67859	1.20144	3ssIntronicRegion	Exclusion	shuffle	early
AAAGGG	2.90207	1.77611	1.44242	3ssIntronicRegion	Exclusion	kcl	early	-1.39703	0.443623	0.860039	3ssIntronicRegion	Exclusion	shuffle	early
GTGCGT	2.88003	1.5157	1.84832	3ssIntronicRegion	Exclusion	kcl	early	2.54537	0.574896	1.40646	3ssIntronicRegion	Exclusion	shuffle	early
CGGAGG	2.88003	1.35008	1.75422	3ssIntronicRegion	Exclusion	kcl	early	0.0409355	0.105571	0.917353	3ssIntronicRegion	Exclusion	shuffle	early
TCCTGC	2.85997	1.35484	1.28445	3ssIntronicRegion	Exclusion	kcl	early	-1.59227	0.333475	0.910536	3ssIntronicRegion	Exclusion	shuffle	early
CTCTGG	2.84369	1.51227	1.28406	3ssIntronicRegion	Exclusion	kcl	early	0.594861	0.216728	1.0618	3ssIntronicRegion	Exclusion	shuffle	early
ATGACT	2.81663	1.37647	1.4197	3ssIntronicRegion	Exclusion	kcl	early	1.37013	0.555549	1.20354	3ssIntronicRegion	Exclusion	shuffle	early
CCCTGC	2.78478	1.81005	1.3317	3ssIntronicRegion	Exclusion	kcl	early	2.23491	0.988069	1.21224	3ssIntronicRegion	Exclusion	shuffle	early
GACCCA	2.75629	1.39088	1.4276	3ssIntronicRegion	Exclusion	kcl	early	-0.0274891	0.0316331	0.97407	3ssIntronicRegion	Exclusion	shuffle	early
TCCTTG	2.75326	1.56164	1.34354	3ssIntronicRegion	Exclusion	kcl	early	1.07305	0.434649	1.12895	3ssIntronicRegion	Exclusion	shuffle	early
GCGGTG	2.72997	1.43401	1.80935	3ssIntronicRegion	Exclusion	kcl	early	-0.490671	0.0471015	0.956909	3ssIntronicRegion	Exclusion	shuffle	early
GAGGAA	2.71566	1.3338	1.3098	3ssIntronicRegion	Exclusion	kcl	early	-1.31923	0.460112	0.878794	3ssIntronicRegion	Exclusion	shuffle	early
GCGTGC	2.70167	1.39116	1.89512	3ssIntronicRegion	Exclusion	kcl	early	0.248348	0.11492	0.905633	3ssIntronicRegion	Exclusion	shuffle	early
GGGGAT	2.67035	1.35146	1.42145	3ssIntronicRegion	Exclusion	kcl	early	-0.797707	0.132655	0.934875	3ssIntronicRegion	Exclusion	shuffle	early
CTAATG	2.66526	1.55981	1.46283	3ssIntronicRegion	Exclusion	kcl	early	0.0771461	0	0.989258	3ssIntronicRegion	Exclusion	shuffle	early
GGACCT	2.66254	1.52252	1.47148	3ssIntronicRegion	Exclusion	kcl	early	0.81513	0.218511	1.09865	3ssIntronicRegion	Exclusion	shuffle	early
TGGGCC	2.66125	1.43731	1.34578	3ssIntronicRegion	Exclusion	kcl	early	0.581497	0.0794367	1.0391	3ssIntronicRegion	Exclusion	shuffle	early
ACCTGC	2.25904	1.3511	1.34743	3ssIntronicRegion	Exclusion	kcl	early	-0.154001	0	0.999191	3ssIntronicRegion	Exclusion	shuffle	early
CCCTCC	2.06421	2.03271	1.3548	3ssIntronicRegion	Exclusion	kcl	early	-2.57024	0.113117	0.96162	3ssIntronicRegion	Exclusion	shuffle	early
TACAGT	1.9879	1.583	1.43506	3ssIntronicRegion	Exclusion	kcl	early	-0.863539	0.0288036	1.01533	3ssIntronicRegion	Exclusion	shuffle	early
CCCGGG	1.64417	1.83526	1.68144	3ssIntronicRegion	Exclusion	kcl	early	1.25206	0.591578	1.28029	3ssIntronicRegion	Exclusion	shuffle	early
TGGCTG	7.95359	3.92039	1.61047	3ssIntronicRegion	Exclusion	kcl	late	-1.48633	0.451219	0.887761	3ssIntronicRegion	Exclusion	shuffle	late
TAGGGG	7.24584	4.34388	2.44111	3ssIntronicRegion	Exclusion	kcl	late	1.16187	0.403954	1.20612	3ssIntronicRegion	Exclusion	shuffle	late
TGCGGT	6.72943	2.81884	3.23559	3ssIntronicRegion	Exclusion	kcl	late	0.832191	0.310205	1.33561	3ssIntronicRegion	Exclusion	shuffle	late
TCTGCC	6.60211	3.57092	1.60832	3ssIntronicRegion	Exclusion	kcl	late	-1.25771	0.251488	0.924642	3ssIntronicRegion	Exclusion	shuffle	late
GGCTGG	6.48894	2.6442	1.48568	3ssIntronicRegion	Exclusion	kcl	late	-0.380323	0.0228445	1.0149	3ssIntronicRegion	Exclusion	shuffle	late
ATCCGA	6.167	1.94077	3.98362	3ssIntronicRegion	Exclusion	kcl	late	-0.304067	0.0841134	0.857061	3ssIntronicRegion	Exclusion	shuffle	late
CTCTGC	6.06743	3.91927	1.56876	3ssIntronicRegion	Exclusion	kcl	late	-2.57266	0.531016	0.882645	3ssIntronicRegion	Exclusion	shuffle	late
GGGGCT	5.64134	3.34159	1.72776	3ssIntronicRegion	Exclusion	kcl	late	0.941168	0.26489	1.10452	3ssIntronicRegion	Exclusion	shuffle	late
GGCCTG	5.60152	2.96659	1.60316	3ssIntronicRegion	Exclusion	kcl	late	-1.38921	0.447278	0.871975	3ssIntronicRegion	Exclusion	shuffle	late
CCCTGA	5.5338	2.65093	1.59218	3ssIntronicRegion	Exclusion	kcl	late	0.846866	0.568477	1.18841	3ssIntronicRegion	Exclusion	shuffle	late
ACTGGG	5.52902	3.02259	1.66055	3ssIntronicRegion	Exclusion	kcl	late	-0.791768	0.230677	0.912855	3ssIntronicRegion	Exclusion	shuffle	late
TTACCG	5.41235	1.68129	4.3068	3ssIntronicRegion	Exclusion	kcl	late	-0.0267224	0	1.04963	3ssIntronicRegion	Exclusion	shuffle	late
TCCGAC	5.38988	1.81129	2.74434	3ssIntronicRegion	Exclusion	kcl	late	0.0536599	0	0.97891	3ssIntronicRegion	Exclusion	shuffle	late
CACTGG	5.33593	2.6145	1.56067	3ssIntronicRegion	Exclusion	kcl	late	-1.18568	0.565221	0.842046	3ssIntronicRegion	Exclusion	shuffle	late
GTGCGG	5.30613	2.21525	2.46922	3ssIntronicRegion	Exclusion	kcl	late	-0.0901834	0.0554393	1.05032	3ssIntronicRegion	Exclusion	shuffle	late
TGTGGG	5.23117	2.59664	1.4861	3ssIntronicRegion	Exclusion	kcl	late	2.69504	0.670036	1.18191	3ssIntronicRegion	Exclusion	shuffle	late
AGGGCC	5.1022	2.28149	1.58063	3ssIntronicRegion	Exclusion	kcl	late	2.56982	0.655879	1.2366	3ssIntronicRegion	Exclusion	shuffle	late
GCGTTT	5.03101	2.21525	2.46922	3ssIntronicRegion	Exclusion	kcl	late	-1.06102	0.258811	0.802926	3ssIntronicRegion	Exclusion	shuffle	late
GACACA	5.0172	2.14998	1.59803	3ssIntronicRegion	Exclusion	kcl	late	0.369039	0.0306173	1.02294	3ssIntronicRegion	Exclusion	shuffle	late
CGTTTC	4.98957	2.03465	1.9689	3ssIntronicRegion	Exclusion	kcl	late	0.367724	0.045488	1.05092	3ssIntronicRegion	Exclusion	shuffle	late
GGGCCT	4.94712	2.69178	1.60664	3ssIntronicRegion	Exclusion	kcl	late	0.940913	0.269372	1.10579	3ssIntronicRegion	Exclusion	shuffle	late
TACCGG	4.83967	1.46132	3.97146	3ssIntronicRegion	Exclusion	kcl	late	-0.368156	0	0.932021	3ssIntronicRegion	Exclusion	shuffle	late
GCCCTC	4.76515	2.23447	1.52051	3ssIntronicRegion	Exclusion	kcl	late	-0.583821	0.185303	0.931534	3ssIntronicRegion	Exclusion	shuffle	late
GCTCCT	4.73659	2.42004	1.5494	3ssIntronicRegion	Exclusion	kcl	late	1.0409	0.426394	1.15162	3ssIntronicRegion	Exclusion	shuffle	late
CCCCAA	4.66222	2.18693	1.54269	3ssIntronicRegion	Exclusion	kcl	late	1.14998	0.229921	1.09288	3ssIntronicRegion	Exclusion	shuffle	late
AGGTGC	4.62886	2.61881	1.75793	3ssIntronicRegion	Exclusion	kcl	late	0.831308	0.14259	1.06996	3ssIntronicRegion	Exclusion	shuffle	late
GGGGTA	4.61439	2.33489	1.84703	3ssIntronicRegion	Exclusion	kcl	late	-1.48879	0.540612	0.78273	3ssIntronicRegion	Exclusion	shuffle	late
TCCGTC	4.57857	2.05135	2.38957	3ssIntronicRegion	Exclusion	kcl	late	-1.2965	0.196344	0.817651	3ssIntronicRegion	Exclusion	shuffle	late
CTCTAC	4.49703	2.09054	1.66771	3ssIntronicRegion	Exclusion	kcl	late	-0.670859	0.149684	0.930252	3ssIntronicRegion	Exclusion	shuffle	late
GGGTGG	4.49339	2.32056	1.4614	3ssIntronicRegion	Exclusion	kcl	late	-0.251213	0.189418	0.937334	3ssIntronicRegion	Exclusion	shuffle	late
CTGCAG	4.44432	2.23547	1.42194	3ssIntronicRegion	Exclusion	kcl	late	-1.24806	0.244424	0.923744	3ssIntronicRegion	Exclusion	shuffle	late
CCACAC	4.40575	1.62769	1.43723	3ssIntronicRegion	Exclusion	kcl	late	0.108736	0	0.989986	3ssIntronicRegion	Exclusion	shuffle	late
GTGAGG	4.39935	2.102	1.50962	3ssIntronicRegion	Exclusion	kcl	late	-0.657829	0.027375	0.982611	3ssIntronicRegion	Exclusion	shuffle	late
GCTGTT	4.38469	1.85466	1.39914	3ssIntronicRegion	Exclusion	kcl	late	2.90304	0.985905	1.25877	3ssIntronicRegion	Exclusion	shuffle	late
GGGTAC	4.37969	2.07892	1.8238	3ssIntronicRegion	Exclusion	kcl	late	-2.33749	0.994677	0.681171	3ssIntronicRegion	Exclusion	shuffle	late
GGCTGA	4.371	2.36155	1.54769	3ssIntronicRegion	Exclusion	kcl	late	0.145984	0.0550943	1.0314	3ssIntronicRegion	Exclusion	shuffle	late
ATACTG	4.36054	2.15943	1.63006	3ssIntronicRegion	Exclusion	kcl	late	-0.37741	0.0317735	0.973445	3ssIntronicRegion	Exclusion	shuffle	late
GGTTAA	4.34724	1.82458	1.70015	3ssIntronicRegion	Exclusion	kcl	late	-0.00899353	0.0776879	1.05182	3ssIntronicRegion	Exclusion	shuffle	late
GCCTGC	4.32247	1.98269	1.46476	3ssIntronicRegion	Exclusion	kcl	late	-0.274581	0.2191	1.09038	3ssIntronicRegion	Exclusion	shuffle	late
AGACAT	4.30793	2.17149	1.6078	3ssIntronicRegion	Exclusion	kcl	late	1.98986	0.940719	1.31419	3ssIntronicRegion	Exclusion	shuffle	late
GCATTC	4.30389	2.11848	1.68253	3ssIntronicRegion	Exclusion	kcl	late	1.5708	0.497182	1.23443	3ssIntronicRegion	Exclusion	shuffle	late
TCGCTT	4.28275	1.71935	2.36119	3ssIntronicRegion	Exclusion	kcl	late	-0.816044	0.208893	0.836596	3ssIntronicRegion	Exclusion	shuffle	late
GTGGGG	4.27698	2.87355	1.55263	3ssIntronicRegion	Exclusion	kcl	late	2.5018	0.4237	1.13752	3ssIntronicRegion	Exclusion	shuffle	late
GTCCCA	4.2695	1.33326	1.38674	3ssIntronicRegion	Exclusion	kcl	late	0.293434	0.163197	1.06776	3ssIntronicRegion	Exclusion	shuffle	late
ACAGTG	4.26065	1.32724	1.33044	3ssIntronicRegion	Exclusion	kcl	late	0.226205	0.141365	0.944354	3ssIntronicRegion	Exclusion	shuffle	late
ATCGCT	4.20568	1.73476	2.23077	3ssIntronicRegion	Exclusion	kcl	late	1.29009	0.456455	1.34899	3ssIntronicRegion	Exclusion	shuffle	late
GATGAC	4.20433	1.92148	1.76494	3ssIntronicRegion	Exclusion	kcl	late	-2.69046	1.27779	0.642644	3ssIntronicRegion	Exclusion	shuffle	late
TCCTCA	4.18718	2.53907	1.51444	3ssIntronicRegion	Exclusion	kcl	late	0.859203	0.106951	1.04603	3ssIntronicRegion	Exclusion	shuffle	late
CGAATT	4.18316	1.31687	3.22679	3ssIntronicRegion	Exclusion	kcl	late	-0.70959	0.0948923	0.814659	3ssIntronicRegion	Exclusion	shuffle	late
GTGACT	4.18025	1.57802	1.41606	3ssIntronicRegion	Exclusion	kcl	late	-0.157941	0.027375	0.982611	3ssIntronicRegion	Exclusion	shuffle	late
CCGGCT	4.16301	1.61231	2.06667	3ssIntronicRegion	Exclusion	kcl	late	3.1369	1.18048	1.79286	3ssIntronicRegion	Exclusion	shuffle	late
GGGGTG	4.15308	1.58775	1.40161	3ssIntronicRegion	Exclusion	kcl	late	1.13578	0.34532	1.12906	3ssIntronicRegion	Exclusion	shuffle	late
ATGAGA	4.13671	2.24402	1.58869	3ssIntronicRegion	Exclusion	kcl	late	0.0633472	0	1.01227	3ssIntronicRegion	Exclusion	shuffle	late
CAAGGA	4.10963	1.45575	1.47214	3ssIntronicRegion	Exclusion	kcl	late	-2.92408	1.21688	0.704287	3ssIntronicRegion	Exclusion	shuffle	late
GGGGGT	4.10468	1.4689	1.45295	3ssIntronicRegion	Exclusion	kcl	late	-1.48935	0.305825	0.883502	3ssIntronicRegion	Exclusion	shuffle	late
GCCCCA	4.06877	2.35954	1.58923	3ssIntronicRegion	Exclusion	kcl	late	1.04658	0.197629	1.08102	3ssIntronicRegion	Exclusion	shuffle	late
GAGATC	4.05356	1.84785	1.63655	3ssIntronicRegion	Exclusion	kcl	late	1.56205	0.561767	1.25749	3ssIntronicRegion	Exclusion	shuffle	late
TGGGGG	4.05179	1.3639	1.3297	3ssIntronicRegion	Exclusion	kcl	late	-1.31081	0.491869	0.863905	3ssIntronicRegion	Exclusion	shuffle	late
GCCTGT	4.0451	1.56698	1.36134	3ssIntronicRegion	Exclusion	kcl	late	1.60371	0.351446	1.11896	3ssIntronicRegion	Exclusion	shuffle	late
GCAGCC	4.01841	1.63405	1.42043	3ssIntronicRegion	Exclusion	kcl	late	1.3613	0.402593	1.14638	3ssIntronicRegion	Exclusion	shuffle	late
GTTGGG	3.9839	1.47818	1.41222	3ssIntronicRegion	Exclusion	kcl	late	-0.845932	0.285939	0.899618	3ssIntronicRegion	Exclusion	shuffle	late
CGGTTC	3.98368	1.40426	2.17506	3ssIntronicRegion	Exclusion	kcl	late	2.47549	0.853244	1.82866	3ssIntronicRegion	Exclusion	shuffle	late
CTAGAG	3.97938	1.3557	1.44519	3ssIntronicRegion	Exclusion	kcl	late	0.70914	0.223204	1.10311	3ssIntronicRegion	Exclusion	shuffle	late
GGGCTG	3.962	2.14457	1.45063	3ssIntronicRegion	Exclusion	kcl	late	0.524752	0.0242742	1.01785	3ssIntronicRegion	Exclusion	shuffle	late
TGACTC	3.95417	2.1656	1.55601	3ssIntronicRegion	Exclusion	kcl	late	-0.23379	0.16327	0.925089	3ssIntronicRegion	Exclusion	shuffle	late
CTCACA	3.94156	1.94244	1.45002	3ssIntronicRegion	Exclusion	kcl	late	0.94367	0.248908	1.089	3ssIntronicRegion	Exclusion	shuffle	late
GGGCAA	3.91819	1.49504	1.65215	3ssIntronicRegion	Exclusion	kcl	late	-0.656164	0.184539	0.881239	3ssIntronicRegion	Exclusion	shuffle	late
TGCCAC	3.90011	1.88062	1.52676	3ssIntronicRegion	Exclusion	kcl	late	0.481954	0.0619281	1.03884	3ssIntronicRegion	Exclusion	shuffle	late
GGAATC	3.89663	1.34886	1.54712	3ssIntronicRegion	Exclusion	kcl	late	-0.577215	0.284255	0.854055	3ssIntronicRegion	Exclusion	shuffle	late
GTGGGA	3.86213	2.67055	1.57959	3ssIntronicRegion	Exclusion	kcl	late	0.747693	0.426394	1.15162	3ssIntronicRegion	Exclusion	shuffle	late
TGCTCC	3.86213	2.35126	1.5251	3ssIntronicRegion	Exclusion	kcl	late	-0.862206	0.148219	0.944625	3ssIntronicRegion	Exclusion	shuffle	late
CTCTGG	3.83931	1.55107	1.32452	3ssIntronicRegion	Exclusion	kcl	late	1.9415	0.785178	1.19356	3ssIntronicRegion	Exclusion	shuffle	late
CACTCT	3.83695	1.58775	1.40161	3ssIntronicRegion	Exclusion	kcl	late	0.739563	0.0545862	1.03193	3ssIntronicRegion	Exclusion	shuffle	late
CCAAAC	3.80975	2.24038	1.74927	3ssIntronicRegion	Exclusion	kcl	late	0.286928	0.0364442	1.03062	3ssIntronicRegion	Exclusion	shuffle	late
ACAATC	3.80895	1.68558	1.95144	3ssIntronicRegion	Exclusion	kcl	late	1.49488	0.513821	1.32329	3ssIntronicRegion	Exclusion	shuffle	late
CTCAAT	3.80481	1.58485	1.72154	3ssIntronicRegion	Exclusion	kcl	late	-1.38924	0.378731	0.823286	3ssIntronicRegion	Exclusion	shuffle	late
AGAGAT	3.80193	1.55467	1.40626	3ssIntronicRegion	Exclusion	kcl	late	-2.60585	0.919536	0.778671	3ssIntronicRegion	Exclusion	shuffle	late
CGCTTC	3.78325	1.96728	2.41917	3ssIntronicRegion	Exclusion	kcl	late	-0.539217	0	0.996638	3ssIntronicRegion	Exclusion	shuffle	late
ATGGAA	3.75779	1.91297	1.49553	3ssIntronicRegion	Exclusion	kcl	late	-1.81773	0.610108	0.828757	3ssIntronicRegion	Exclusion	shuffle	late
GCTGGA	3.71765	1.37749	1.38689	3ssIntronicRegion	Exclusion	kcl	late	1.26149	0.361828	1.13461	3ssIntronicRegion	Exclusion	shuffle	late
CTTAGA	3.71466	1.52808	1.48327	3ssIntronicRegion	Exclusion	kcl	late	3.43527	1.28937	1.42141	3ssIntronicRegion	Exclusion	shuffle	late
AGGGGA	3.70627	1.58427	1.43893	3ssIntronicRegion	Exclusion	kcl	late	1.50182	0.438789	1.17498	3ssIntronicRegion	Exclusion	shuffle	late
GGGGAG	3.6465	1.7907	1.39626	3ssIntronicRegion	Exclusion	kcl	late	-0.747246	0.142008	0.943464	3ssIntronicRegion	Exclusion	shuffle	late
CTAGCC	3.64484	1.79341	1.64076	3ssIntronicRegion	Exclusion	kcl	late	-0.159244	0.124154	0.919561	3ssIntronicRegion	Exclusion	shuffle	late
GTCTGC	3.63473	1.42245	1.40755	3ssIntronicRegion	Exclusion	kcl	late	0.610875	0.028853	1.01327	3ssIntronicRegion	Exclusion	shuffle	late
GACTTA	3.63137	1.52841	1.5891	3ssIntronicRegion	Exclusion	kcl	late	0.850055	0.219326	1.12254	3ssIntronicRegion	Exclusion	shuffle	late
CCTGAG	3.63066	1.82786	1.40503	3ssIntronicRegion	Exclusion	kcl	late	-1.92231	0.806281	0.818009	3ssIntronicRegion	Exclusion	shuffle	late
CTCCTA	3.62189	1.82318	1.525	3ssIntronicRegion	Exclusion	kcl	late	-1.81941	0.519655	0.830389	3ssIntronicRegion	Exclusion	shuffle	late
GGGCCC	3.58861	1.96642	1.62453	3ssIntronicRegion	Exclusion	kcl	late	-2.12903	0.926745	0.736838	3ssIntronicRegion	Exclusion	shuffle	late
TCCACT	3.5822	1.85553	1.4928	3ssIntronicRegion	Exclusion	kcl	late	0.833361	0.1595	1.06743	3ssIntronicRegion	Exclusion	shuffle	late
GGATGG	3.5822	1.69128	1.51295	3ssIntronicRegion	Exclusion	kcl	late	4.28322	0.835412	1.29324	3ssIntronicRegion	Exclusion	shuffle	late
AGGGGG	3.57168	1.78908	1.50917	3ssIntronicRegion	Exclusion	kcl	late	-1.51546	0.301084	0.887381	3ssIntronicRegion	Exclusion	shuffle	late
AGGACT	3.57168	1.59753	1.44486	3ssIntronicRegion	Exclusion	kcl	late	-2.25084	0.969847	0.760741	3ssIntronicRegion	Exclusion	shuffle	late
GACTCA	3.56503	1.59129	1.54729	3ssIntronicRegion	Exclusion	kcl	late	-0.0641524	0.150981	1.0905	3ssIntronicRegion	Exclusion	shuffle	late
GACTAG	3.56187	1.6063	1.68633	3ssIntronicRegion	Exclusion	kcl	late	0.545153	0.137257	1.10894	3ssIntronicRegion	Exclusion	shuffle	late
GGATTG	3.52055	1.47279	1.59179	3ssIntronicRegion	Exclusion	kcl	late	1.00521	0.403954	1.20612	3ssIntronicRegion	Exclusion	shuffle	late
GTCAAA	3.50887	1.63098	1.65761	3ssIntronicRegion	Exclusion	kcl	late	-0.577215	0.169223	0.903382	3ssIntronicRegion	Exclusion	shuffle	late
GGCCCC	3.50755	1.5546	1.4709	3ssIntronicRegion	Exclusion	kcl	late	-0.587128	0.0303024	0.980414	3ssIntronicRegion	Exclusion	shuffle	late
CTGGGC	3.50098	1.85466	1.39914	3ssIntronicRegion	Exclusion	kcl	late	-1.47501	0.739867	0.830503	3ssIntronicRegion	Exclusion	shuffle	late
TAGGCT	3.4907	1.47105	1.48036	3ssIntronicRegion	Exclusion	kcl	late	-1.52041	0.608823	0.80228	3ssIntronicRegion	Exclusion	shuffle	late
AGATAG	3.4907	1.39883	1.46888	3ssIntronicRegion	Exclusion	kcl	late	-2.45009	0.826874	0.758947	3ssIntronicRegion	Exclusion	shuffle	late
GGCTGT	3.46355	1.69507	1.37772	3ssIntronicRegion	Exclusion	kcl	late	1.41287	0.686827	1.20088	3ssIntronicRegion	Exclusion	shuffle	late
GCTGTC	3.45363	1.48992	1.37957	3ssIntronicRegion	Exclusion	kcl	late	-1.29314	0.436876	0.868675	3ssIntronicRegion	Exclusion	shuffle	late
GTACCT	3.4337	1.77391	1.59489	3ssIntronicRegion	Exclusion	kcl	late	-1.1032	0.417736	0.837606	3ssIntronicRegion	Exclusion	shuffle	late
TTATGG	3.4337	1.53374	1.52375	3ssIntronicRegion	Exclusion	kcl	late	0.44049	0.0697053	1.05251	3ssIntronicRegion	Exclusion	shuffle	late
TTGTGG	3.39035	1.67821	1.41989	3ssIntronicRegion	Exclusion	kcl	late	-0.790745	0.217957	0.925065	3ssIntronicRegion	Exclusion	shuffle	late
GAGGGT	3.38812	1.5546	1.4709	3ssIntronicRegion	Exclusion	kcl	late	-1.04614	0.355887	0.86953	3ssIntronicRegion	Exclusion	shuffle	late
GGTCCT	3.38812	1.49794	1.44325	3ssIntronicRegion	Exclusion	kcl	late	-2.06574	0.752061	0.790724	3ssIntronicRegion	Exclusion	shuffle	late
GCCCCT	3.37797	1.55528	1.38863	3ssIntronicRegion	Exclusion	kcl	late	0.944715	0.469511	1.16295	3ssIntronicRegion	Exclusion	shuffle	late
CCTGTT	3.37143	1.50855	1.35067	3ssIntronicRegion	Exclusion	kcl	late	0.185197	0.102578	0.958262	3ssIntronicRegion	Exclusion	shuffle	late
GGTGAC	3.32108	1.4415	1.43921	3ssIntronicRegion	Exclusion	kcl	late	-1.16859	0.26063	0.895655	3ssIntronicRegion	Exclusion	shuffle	late
GGGTAT	3.26944	1.65821	1.63379	3ssIntronicRegion	Exclusion	kcl	late	-1.4317	0.586688	0.781653	3ssIntronicRegion	Exclusion	shuffle	late
ATGACT	3.26797	1.32883	1.43071	3ssIntronicRegion	Exclusion	kcl	late	-0.866288	0.355887	0.86953	3ssIntronicRegion	Exclusion	shuffle	late
GATATC	3.22892	1.46387	1.88889	3ssIntronicRegion	Exclusion	kcl	late	-0.243419	0	1.00905	3ssIntronicRegion	Exclusion	shuffle	late
TAGTGG	3.21655	1.53374	1.52375	3ssIntronicRegion	Exclusion	kcl	late	-1.86352	0.588831	0.803593	3ssIntronicRegion	Exclusion	shuffle	late
GGACAC	3.21655	1.67279	1.57072	3ssIntronicRegion	Exclusion	kcl	late	0.0412039	0.0351668	1.03229	3ssIntronicRegion	Exclusion	shuffle	late
TGTCTG	3.19082	1.65997	1.31248	3ssIntronicRegion	Exclusion	kcl	late	0.516943	0.114135	1.03853	3ssIntronicRegion	Exclusion	shuffle	late
TGGGAT	3.17884	1.71506	1.43463	3ssIntronicRegion	Exclusion	kcl	late	2.0212	0.405037	1.14725	3ssIntronicRegion	Exclusion	shuffle	late
TGGGCA	3.1408	1.66607	1.398	3ssIntronicRegion	Exclusion	kcl	late	1.0406	0.174805	1.06641	3ssIntronicRegion	Exclusion	shuffle	late
ACTCAA	3.11259	1.42687	1.56094	3ssIntronicRegion	Exclusion	kcl	late	-0.818092	0.0373679	0.965163	3ssIntronicRegion	Exclusion	shuffle	late
GGCCTT	3.11211	1.32639	1.36395	3ssIntronicRegion	Exclusion	kcl	late	2.23717	0.662202	1.21627	3ssIntronicRegion	Exclusion	shuffle	late
CTTGTG	3.11002	1.58742	1.36474	3ssIntronicRegion	Exclusion	kcl	late	-1.25951	0.42182	0.8792	3ssIntronicRegion	Exclusion	shuffle	late
CTGCCC	3.10498	1.66426	1.33656	3ssIntronicRegion	Exclusion	kcl	late	0.196894	0.04609	0.976675	3ssIntronicRegion	Exclusion	shuffle	late
CTGCTG	3.08524	1.31954	1.26088	3ssIntronicRegion	Exclusion	kcl	late	-0.216709	0.042803	1.01683	3ssIntronicRegion	Exclusion	shuffle	late
AGTGGG	3.07884	2.14092	1.4867	3ssIntronicRegion	Exclusion	kcl	late	-1.55669	0.421691	0.869024	3ssIntronicRegion	Exclusion	shuffle	late
GTGGTC	3.07483	1.33108	1.46781	3ssIntronicRegion	Exclusion	kcl	late	-0.974138	0.35723	0.855302	3ssIntronicRegion	Exclusion	shuffle	late
CCTCAC	3.0643	1.36684	1.38206	3ssIntronicRegion	Exclusion	kcl	late	0.533418	0.120299	1.05446	3ssIntronicRegion	Exclusion	shuffle	late
CTTCCG	3.06423	1.46387	1.88889	3ssIntronicRegion	Exclusion	kcl	late	2.61963	0.847185	1.56261	3ssIntronicRegion	Exclusion	shuffle	late
CACACA	3.03109	1.85466	1.39914	3ssIntronicRegion	Exclusion	kcl	late	-1.93664	0.859884	0.811267	3ssIntronicRegion	Exclusion	shuffle	late
TCCCAG	3.01428	1.36348	1.28609	3ssIntronicRegion	Exclusion	kcl	late	-0.621242	0.207909	0.935726	3ssIntronicRegion	Exclusion	shuffle	late
TAGCTG	3.00667	1.37208	1.42833	3ssIntronicRegion	Exclusion	kcl	late	-0.200577	0.172382	0.925607	3ssIntronicRegion	Exclusion	shuffle	late
CTGTCT	2.99024	2.79487	1.41566	3ssIntronicRegion	Exclusion	kcl	late	-2.36224	0.560199	0.884125	3ssIntronicRegion	Exclusion	shuffle	late
AGCTAG	2.98181	1.31592	1.42383	3ssIntronicRegion	Exclusion	kcl	late	-1.01404	0.42699	0.843322	3ssIntronicRegion	Exclusion	shuffle	late
CTGTTT	2.97617	1.72868	1.29852	3ssIntronicRegion	Exclusion	kcl	late	0.135244	0.0825059	1.02586	3ssIntronicRegion	Exclusion	shuffle	late
GTTAGG	2.95574	1.40525	1.54671	3ssIntronicRegion	Exclusion	kcl	late	0.266988	0.120593	1.07447	3ssIntronicRegion	Exclusion	shuffle	late
AGCATG	2.9489	1.44533	1.37876	3ssIntronicRegion	Exclusion	kcl	late	-1.42236	0.7381	0.818533	3ssIntronicRegion	Exclusion	shuffle	late
CCAGGT	2.88504	1.3018	1.37201	3ssIntronicRegion	Exclusion	kcl	late	0.39284	0.202343	1.08195	3ssIntronicRegion	Exclusion	shuffle	late
CTTCTG	2.87012	1.47179	1.28764	3ssIntronicRegion	Exclusion	kcl	late	1.75022	0.544484	1.13743	3ssIntronicRegion	Exclusion	shuffle	late
CATATA	2.86108	1.31483	1.45841	3ssIntronicRegion	Exclusion	kcl	late	0.213757	0.147064	1.07075	3ssIntronicRegion	Exclusion	shuffle	late
ACCCAG	2.80892	1.78453	1.44367	3ssIntronicRegion	Exclusion	kcl	late	0.838615	0.351272	1.13102	3ssIntronicRegion	Exclusion	shuffle	late
TCTGGT	2.72162	1.36132	1.36101	3ssIntronicRegion	Exclusion	kcl	late	-0.252036	0.116815	0.952853	3ssIntronicRegion	Exclusion	shuffle	late
TGGGCC	2.71951	1.45491	1.4018	3ssIntronicRegion	Exclusion	kcl	late	-1.97163	0.373244	0.869278	3ssIntronicRegion	Exclusion	shuffle	late
AAGACA	2.68849	1.41551	1.36632	3ssIntronicRegion	Exclusion	kcl	late	-0.605194	0.0840786	0.965752	3ssIntronicRegion	Exclusion	shuffle	late
TCCCTG	2.62911	1.40835	1.28945	3ssIntronicRegion	Exclusion	kcl	late	1.37251	0.569515	1.15039	3ssIntronicRegion	Exclusion	shuffle	late
CAGTGT	2.61984	1.35589	1.30851	3ssIntronicRegion	Exclusion	kcl	late	1.47722	0.486245	1.14204	3ssIntronicRegion	Exclusion	shuffle	late
CTAGGG	2.57094	1.53672	1.51639	3ssIntronicRegion	Exclusion	kcl	late	-1.25132	0.192783	0.914965	3ssIntronicRegion	Exclusion	shuffle	late
GAGTGG	2.53694	1.825	1.47988	3ssIntronicRegion	Exclusion	kcl	late	-1.63276	0.232064	0.911501	3ssIntronicRegion	Exclusion	shuffle	late
TTGCCT	2.51255	1.35601	1.32666	3ssIntronicRegion	Exclusion	kcl	late	-0.672474	0.204745	0.929307	3ssIntronicRegion	Exclusion	shuffle	late
CCTCCT	2.40072	1.31074	1.25811	3ssIntronicRegion	Exclusion	kcl	late	-1.5765	0.197136	0.940398	3ssIntronicRegion	Exclusion	shuffle	late
CCTAGG	2.23032	1.34209	1.43783	3ssIntronicRegion	Exclusion	kcl	late	-0.489096	0.0327138	0.968847	3ssIntronicRegion	Exclusion	shuffle	late
CTCCCT	1.87705	1.54709	1.28966	3ssIntronicRegion	Exclusion	kcl	late	1.93577	0.671308	1.16158	3ssIntronicRegion	Exclusion	shuffle	late
GCTCTA	15.0786	3.83276	16.4318	5ssExonicRegion	Exclusion	kcl	early	-0.897194	0.19324	0.768119	5ssExonicRegion	Exclusion	shuffle	early
TCCCGA	11.1748	2.73384	12.519	5ssExonicRegion	Exclusion	kcl	early	0.106059	0	1.12346	5ssExonicRegion	Exclusion	shuffle	early
AGCGCC	9.22286	2.19498	10.5734	5ssExonicRegion	Exclusion	kcl	early	0.506557	0.102163	1.28514	5ssExonicRegion	Exclusion	shuffle	early
ACCGCA	9.22286	2.19498	10.5734	5ssExonicRegion	Exclusion	kcl	early	0.133377	0	1.1556	5ssExonicRegion	Exclusion	shuffle	early
GGTACC	8.24691	1.92917	9.60332	5ssExonicRegion	Exclusion	kcl	early	-0.305342	0	0.962107	5ssExonicRegion	Exclusion	shuffle	early
GTCGGG	8.24691	1.92917	9.60332	5ssExonicRegion	Exclusion	kcl	early	-1.7703	0.662892	0.41078	5ssExonicRegion	Exclusion	shuffle	early
GCCGTG	7.86739	2.37522	6.74074	5ssExonicRegion	Exclusion	kcl	early	-0.605884	0.0910925	0.854289	5ssExonicRegion	Exclusion	shuffle	early
CGGGAG	7.86739	2.37522	6.74074	5ssExonicRegion	Exclusion	kcl	early	0.454451	0.0950333	1.2392	5ssExonicRegion	Exclusion	shuffle	early
GCTGCG	7.5226	2.58415	5.46673	5ssExonicRegion	Exclusion	kcl	early	0.758357	0.188899	1.32644	5ssExonicRegion	Exclusion	shuffle	early
GCCCCG	7.5226	2.58415	5.46673	5ssExonicRegion	Exclusion	kcl	early	0.758357	0.188899	1.32644	5ssExonicRegion	Exclusion	shuffle	early
GCATCT	7.49944	3.5537	3.5699	5ssExonicRegion	Exclusion	kcl	early	-1.49025	0.45594	0.717025	5ssExonicRegion	Exclusion	shuffle	early
GCGCCC	7.27095	1.66635	8.63502	5ssExonicRegion	Exclusion	kcl	early	1.63984	0.411831	1.93142	5ssExonicRegion	Exclusion	shuffle	early
CGTGTT	7.27095	1.66635	8.63502	5ssExonicRegion	Exclusion	kcl	early	0.658844	0.122753	1.44588	5ssExonicRegion	Exclusion	shuffle	early
CTCGTG	7.27095	1.66635	8.63502	5ssExonicRegion	Exclusion	kcl	early	-0.305342	0	0.962107	5ssExonicRegion	Exclusion	shuffle	early
GCGGCC	7.17728	2.12867	6.25347	5ssExonicRegion	Exclusion	kcl	early	0.0836588	0	1.10049	5ssExonicRegion	Exclusion	shuffle	early
CCTACC	6.95912	1.89231	4.48951	5ssExonicRegion	Exclusion	kcl	early	-0.84124	0.288279	0.719388	5ssExonicRegion	Exclusion	shuffle	early
CTGCGC	6.95912	2.34994	5.14038	5ssExonicRegion	Exclusion	kcl	early	1.93762	0.580538	1.79662	5ssExonicRegion	Exclusion	shuffle	early
ATCTAC	6.48717	1.88563	5.7671	5ssExonicRegion	Exclusion	kcl	early	1.44954	0.373019	1.73822	5ssExonicRegion	Exclusion	shuffle	early
CATCCG	6.48717	1.88563	5.7671	5ssExonicRegion	Exclusion	kcl	early	-0.294439	0	0.962072	5ssExonicRegion	Exclusion	shuffle	early
GCCGCA	6.39564	1.89231	4.48951	5ssExonicRegion	Exclusion	kcl	early	-1.16284	0.19324	0.768119	5ssExonicRegion	Exclusion	shuffle	early
CGTGTG	6.39564	2.1192	4.81464	5ssExonicRegion	Exclusion	kcl	early	1.70805	0.478999	1.772	5ssExonicRegion	Exclusion	shuffle	early
TACCGC	6.295	1.40708	7.66851	5ssExonicRegion	Exclusion	kcl	early	-0.744061	0.125484	0.768975	5ssExonicRegion	Exclusion	shuffle	early
ACTACG	6.295	1.40708	7.66851	5ssExonicRegion	Exclusion	kcl	early	0.216586	0	1.28409	5ssExonicRegion	Exclusion	shuffle	early
TGTCGG	6.295	1.40708	7.66851	5ssExonicRegion	Exclusion	kcl	early	-1.6215	0.553713	0.383779	5ssExonicRegion	Exclusion	shuffle	early
TGCGCA	6.295	1.40708	7.66851	5ssExonicRegion	Exclusion	kcl	early	2.37342	0.539302	2.89732	5ssExonicRegion	Exclusion	shuffle	early
CCGCTA	6.295	1.40708	7.66851	5ssExonicRegion	Exclusion	kcl	early	-0.812652	0.141939	0.720941	5ssExonicRegion	Exclusion	shuffle	early
TAGTTC	6.295	1.40708	7.66851	5ssExonicRegion	Exclusion	kcl	early	-2.1411	0.989371	0.273601	5ssExonicRegion	Exclusion	shuffle	early
TGCCCC	6.19807	2.58259	3.0148	5ssExonicRegion	Exclusion	kcl	early	0.674285	0.291912	1.26818	5ssExonicRegion	Exclusion	shuffle	early
TGCGGG	5.83216	1.89231	4.48951	5ssExonicRegion	Exclusion	kcl	early	0.825244	0.201511	1.37817	5ssExonicRegion	Exclusion	shuffle	early
TCGGGA	5.83216	1.89231	4.48951	5ssExonicRegion	Exclusion	kcl	early	0.454451	0.0950333	1.2392	5ssExonicRegion	Exclusion	shuffle	early
CGGATG	5.83216	1.89231	4.48951	5ssExonicRegion	Exclusion	kcl	early	0.064661	0	1.08326	5ssExonicRegion	Exclusion	shuffle	early
AGTCGG	5.79706	1.64659	5.28163	5ssExonicRegion	Exclusion	kcl	early	1.01082	0.235969	1.54365	5ssExonicRegion	Exclusion	shuffle	early
GTGATG	5.73391	2.75923	2.64232	5ssExonicRegion	Exclusion	kcl	early	2.9283	1.12621	1.70675	5ssExonicRegion	Exclusion	shuffle	early
GCAGCT	5.66017	2.59122	2.32752	5ssExonicRegion	Exclusion	kcl	early	-0.477772	0.046685	0.961174	5ssExonicRegion	Exclusion	shuffle	early
CAAGGG	5.55597	2.33478	3.02268	5ssExonicRegion	Exclusion	kcl	early	-0.515496	0.0648458	0.904268	5ssExonicRegion	Exclusion	shuffle	early
AGCTCT	5.42639	2.42364	2.49851	5ssExonicRegion	Exclusion	kcl	early	1.00134	0.328049	1.24326	5ssExonicRegion	Exclusion	shuffle	early
CCCAAC	5.34705	1.96956	3.46952	5ssExonicRegion	Exclusion	kcl	early	0.653988	0.169224	1.254	5ssExonicRegion	Exclusion	shuffle	early
GGGACG	5.26868	1.66972	4.16497	5ssExonicRegion	Exclusion	kcl	early	-0.629035	0.097083	0.840972	5ssExonicRegion	Exclusion	shuffle	early
CCGACT	5.26868	1.66972	4.16497	5ssExonicRegion	Exclusion	kcl	early	0.825244	0.201511	1.37817	5ssExonicRegion	Exclusion	shuffle	early
ATGTCC	5.25978	2.02403	3.21539	5ssExonicRegion	Exclusion	kcl	early	0.00839345	0	1.04299	5ssExonicRegion	Exclusion	shuffle	early
GTGACA	5.2109	1.96601	2.77568	5ssExonicRegion	Exclusion	kcl	early	2.27408	0.668366	1.61512	5ssExonicRegion	Exclusion	shuffle	early
TCTAAT	5.10695	1.41214	4.79705	5ssExonicRegion	Exclusion	kcl	early	1.44954	0.373019	1.73822	5ssExonicRegion	Exclusion	shuffle	early
CGGCAC	5.10695	1.41214	4.79705	5ssExonicRegion	Exclusion	kcl	early	-1.39951	0.42236	0.548213	5ssExonicRegion	Exclusion	shuffle	early
CCGTGA	5.10695	1.41214	4.79705	5ssExonicRegion	Exclusion	kcl	early	0.106059	0	1.12346	5ssExonicRegion	Exclusion	shuffle	early
CTCCGG	4.86133	1.83038	3.05178	5ssExonicRegion	Exclusion	kcl	early	0.316163	0.0764295	1.1389	5ssExonicRegion	Exclusion	shuffle	early
GCGCTC	4.7052	1.45197	3.84104	5ssExonicRegion	Exclusion	kcl	early	-0.282187	0	0.962002	5ssExonicRegion	Exclusion	shuffle	early
CGATGC	4.7052	1.45197	3.84104	5ssExonicRegion	Exclusion	kcl	early	0.0836588	0	1.10049	5ssExonicRegion	Exclusion	shuffle	early
GGCCGC	4.7052	1.45197	3.84104	5ssExonicRegion	Exclusion	kcl	early	0.506557	0.102163	1.28514	5ssExonicRegion	Exclusion	shuffle	early
GATCGA	4.7052	1.45197	3.84104	5ssExonicRegion	Exclusion	kcl	early	-0.975883	0.221912	0.720167	5ssExonicRegion	Exclusion	shuffle	early
CTCCCC	4.64379	2.17748	2.4619	5ssExonicRegion	Exclusion	kcl	early	-0.0691853	0	1.00827	5ssExonicRegion	Exclusion	shuffle	early
GCCCCT	4.57135	1.86295	2.57445	5ssExonicRegion	Exclusion	kcl	early	1.63002	0.52956	1.48944	5ssExonicRegion	Exclusion	shuffle	early
ACCTCA	4.56362	1.96526	2.18195	5ssExonicRegion	Exclusion	kcl	early	0.102059	0	1.04026	5ssExonicRegion	Exclusion	shuffle	early
GGCGCT	4.5385	1.50774	3.36389	5ssExonicRegion	Exclusion	kcl	early	0.454451	0.0950333	1.2392	5ssExonicRegion	Exclusion	shuffle	early
GCTGCT	4.50981	1.57469	1.93573	5ssExonicRegion	Exclusion	kcl	early	1.11343	0.108384	1.1259	5ssExonicRegion	Exclusion	shuffle	early
AGTGAT	4.4741	1.57197	3.07829	5ssExonicRegion	Exclusion	kcl	early	2.30841	0.72403	1.93663	5ssExonicRegion	Exclusion	shuffle	early
TTGTGC	4.4741	1.57197	3.07829	5ssExonicRegion	Exclusion	kcl	early	-1.16284	0.305674	0.697616	5ssExonicRegion	Exclusion	shuffle	early
CTCGGG	4.4741	1.57197	3.07829	5ssExonicRegion	Exclusion	kcl	early	-0.276721	0	0.961931	5ssExonicRegion	Exclusion	shuffle	early
TGCTCT	4.31959	1.53507	1.99446	5ssExonicRegion	Exclusion	kcl	early	-1.01683	0.470188	0.764628	5ssExonicRegion	Exclusion	shuffle	early
CTCCCA	4.25668	1.61622	1.889	5ssExonicRegion	Exclusion	kcl	early	1.55456	0.388937	1.30571	5ssExonicRegion	Exclusion	shuffle	early
CTGTGG	4.25058	1.87108	1.83232	5ssExonicRegion	Exclusion	kcl	early	0.34164	0.139712	1.10356	5ssExonicRegion	Exclusion	shuffle	early
CCGCAG	4.24601	1.69258	2.46488	5ssExonicRegion	Exclusion	kcl	early	-0.528918	0.0692953	0.8968	5ssExonicRegion	Exclusion	shuffle	early
TGATGC	4.22177	1.73097	2.1295	5ssExonicRegion	Exclusion	kcl	early	2.35101	0.796864	1.55602	5ssExonicRegion	Exclusion	shuffle	early
CACAAG	4.22177	1.73097	2.1295	5ssExonicRegion	Exclusion	kcl	early	-2.336	1.01587	0.577637	5ssExonicRegion	Exclusion	shuffle	early
TGTGGC	4.12205	1.64304	2.14138	5ssExonicRegion	Exclusion	kcl	early	0.845265	0.266373	1.22038	5ssExonicRegion	Exclusion	shuffle	early
GACTCC	4.10565	1.69155	2.28175	5ssExonicRegion	Exclusion	kcl	early	-1.35382	0.389625	0.729181	5ssExonicRegion	Exclusion	shuffle	early
GTGGAC	4.10565	1.93927	2.51236	5ssExonicRegion	Exclusion	kcl	early	-0.730354	0.214524	0.807509	5ssExonicRegion	Exclusion	shuffle	early
CTCCTA	4.06443	1.45667	2.72547	5ssExonicRegion	Exclusion	kcl	early	-1.09101	0.273379	0.737804	5ssExonicRegion	Exclusion	shuffle	early
CTACTT	4.05051	1.30737	3.12072	5ssExonicRegion	Exclusion	kcl	early	0.0836588	0	1.10049	5ssExonicRegion	Exclusion	shuffle	early
CGCAGA	4.03762	1.38054	2.88323	5ssExonicRegion	Exclusion	kcl	early	1.93762	0.580538	1.79662	5ssExonicRegion	Exclusion	shuffle	early
CAAGCA	4.02041	1.55423	2.07909	5ssExonicRegion	Exclusion	kcl	early	-1.28997	0.272772	0.79128	5ssExonicRegion	Exclusion	shuffle	early
GTCTCC	4.01275	1.86295	2.57445	5ssExonicRegion	Exclusion	kcl	early	1.70766	0.552369	1.53293	5ssExonicRegion	Exclusion	shuffle	early
CCCCAG	3.98533	1.60692	1.65978	5ssExonicRegion	Exclusion	kcl	early	1.85142	0.783429	1.35967	5ssExonicRegion	Exclusion	shuffle	early
CCCAGG	3.98533	1.60692	1.65978	5ssExonicRegion	Exclusion	kcl	early	1.51619	0.402837	1.20668	5ssExonicRegion	Exclusion	shuffle	early
GAGCCC	3.96974	1.79191	2.21254	5ssExonicRegion	Exclusion	kcl	early	-0.689121	0.0552975	0.9188	5ssExonicRegion	Exclusion	shuffle	early
ACTGGG	3.91684	1.61934	2.17198	5ssExonicRegion	Exclusion	kcl	early	-1.59803	0.52249	0.669338	5ssExonicRegion	Exclusion	shuffle	early
GGCTCC	3.91684	1.61934	2.17198	5ssExonicRegion	Exclusion	kcl	early	-1.74928	0.609474	0.651289	5ssExonicRegion	Exclusion	shuffle	early
TGGAGG	3.88376	1.52598	1.64956	5ssExonicRegion	Exclusion	kcl	early	1.1373	0.300751	1.1777	5ssExonicRegion	Exclusion	shuffle	early
AGCAGC	3.85688	1.31721	1.58759	5ssExonicRegion	Exclusion	kcl	early	0.0876198	0	1.00845	5ssExonicRegion	Exclusion	shuffle	early
GGGCTC	3.81136	1.53521	2.19194	5ssExonicRegion	Exclusion	kcl	early	-1.18053	0.309419	0.756333	5ssExonicRegion	Exclusion	shuffle	early
CAGAGT	3.7497	1.55423	2.07909	5ssExonicRegion	Exclusion	kcl	early	1.93103	0.67757	1.51542	5ssExonicRegion	Exclusion	shuffle	early
AGCCCC	3.71748	1.74788	1.93928	5ssExonicRegion	Exclusion	kcl	early	1.27949	0.45921	1.33325	5ssExonicRegion	Exclusion	shuffle	early
AGAACT	3.70658	1.52983	1.88473	5ssExonicRegion	Exclusion	kcl	early	0.272239	0.0489841	1.07117	5ssExonicRegion	Exclusion	shuffle	early
GTCTGT	3.63507	1.32307	2.00733	5ssExonicRegion	Exclusion	kcl	early	0.912242	0.380048	1.32981	5ssExonicRegion	Exclusion	shuffle	early
GTCCAG	3.58952	1.4429	1.88018	5ssExonicRegion	Exclusion	kcl	early	-0.860768	0.173249	0.852096	5ssExonicRegion	Exclusion	shuffle	early
GGACAC	3.51707	1.38314	2.10229	5ssExonicRegion	Exclusion	kcl	early	-2.53722	1.22422	0.496502	5ssExonicRegion	Exclusion	shuffle	early
TCCAGG	3.4848	1.39613	1.67632	5ssExonicRegion	Exclusion	kcl	early	2.43493	0.823513	1.44441	5ssExonicRegion	Exclusion	shuffle	early
TACCAG	3.46569	1.3104	1.93045	5ssExonicRegion	Exclusion	kcl	early	0.144921	0.0554476	1.05509	5ssExonicRegion	Exclusion	shuffle	early
GATGTG	3.46569	1.3104	1.93045	5ssExonicRegion	Exclusion	kcl	early	1.29544	0.431511	1.32457	5ssExonicRegion	Exclusion	shuffle	early
GCCCAG	3.45387	1.44734	1.66184	5ssExonicRegion	Exclusion	kcl	early	-0.157516	0.0428236	0.960952	5ssExonicRegion	Exclusion	shuffle	early
CCTGGG	3.44765	1.53393	1.80523	5ssExonicRegion	Exclusion	kcl	early	-0.30636	0.154443	0.899361	5ssExonicRegion	Exclusion	shuffle	early
CTGAAG	3.36874	1.47557	1.61076	5ssExonicRegion	Exclusion	kcl	early	1.03783	0.473054	1.23808	5ssExonicRegion	Exclusion	shuffle	early
GTGGCT	3.35331	1.32307	2.00733	5ssExonicRegion	Exclusion	kcl	early	0.704645	0.209646	1.20665	5ssExonicRegion	Exclusion	shuffle	early
CCATCC	3.35331	1.32307	2.00733	5ssExonicRegion	Exclusion	kcl	early	-0.939858	0.207816	0.815047	5ssExonicRegion	Exclusion	shuffle	early
GCCTAC	3.35331	1.32307	2.00733	5ssExonicRegion	Exclusion	kcl	early	0.990995	0.302055	1.28835	5ssExonicRegion	Exclusion	shuffle	early
TGCACC	3.35331	1.32307	2.00733	5ssExonicRegion	Exclusion	kcl	early	-2.12804	0.870081	0.580331	5ssExonicRegion	Exclusion	shuffle	early
GTGGCC	3.33945	1.55423	2.07909	5ssExonicRegion	Exclusion	kcl	early	0.620177	0.122195	1.11658	5ssExonicRegion	Exclusion	shuffle	early
CTTCAC	3.20828	1.32307	2.00733	5ssExonicRegion	Exclusion	kcl	early	0.59588	0.191594	1.16843	5ssExonicRegion	Exclusion	shuffle	early
CGGCGG	10.5391	1.94694	9.13235	5ssExonicRegion	Exclusion	kcl	late	-1.7621	0.122842	0.688676	5ssExonicRegion	Exclusion	shuffle	late
AAGCGA	9.53593	2.21633	10.1577	5ssExonicRegion	Exclusion	kcl	late	2.70281	0.661532	2.42557	5ssExonicRegion	Exclusion	shuffle	late
TGTGCG	9.53593	2.48854	11.1853	5ssExonicRegion	Exclusion	kcl	late	-0.538771	0	0.861763	5ssExonicRegion	Exclusion	shuffle	late
GCGATG	8.53281	2.21633	10.1577	5ssExonicRegion	Exclusion	kcl	late	-1.36948	0.294676	0.515957	5ssExonicRegion	Exclusion	shuffle	late
AGCGAT	8.53281	2.21633	10.1577	5ssExonicRegion	Exclusion	kcl	late	1.52804	0.475197	2.07684	5ssExonicRegion	Exclusion	shuffle	late
AGCATA	8.16604	2.65754	7.13305	5ssExonicRegion	Exclusion	kcl	late	-0.652842	0.0843861	0.845338	5ssExonicRegion	Exclusion	shuffle	late
TGGCGT	7.52968	1.94694	9.13235	5ssExonicRegion	Exclusion	kcl	late	-1.63945	0.464459	0.441793	5ssExonicRegion	Exclusion	shuffle	late
CATCGG	7.25038	2.6206	5.44056	5ssExonicRegion	Exclusion	kcl	late	-1.49628	0.445822	0.600783	5ssExonicRegion	Exclusion	shuffle	late
AAGCAT	6.78377	2.62024	4.59544	5ssExonicRegion	Exclusion	kcl	late	0.591407	0.172929	1.24511	5ssExonicRegion	Exclusion	shuffle	late
TCCGGC	6.74739	2.1529	6.10116	5ssExonicRegion	Exclusion	kcl	late	-1.52142	0.412243	0.515442	5ssExonicRegion	Exclusion	shuffle	late
CGGGAG	6.67121	2.38179	5.09514	5ssExonicRegion	Exclusion	kcl	late	1.43694	0.456008	1.63381	5ssExonicRegion	Exclusion	shuffle	late
CTAAGC	6.52655	1.68082	8.10913	5ssExonicRegion	Exclusion	kcl	late	-0.954126	0.122842	0.688676	5ssExonicRegion	Exclusion	shuffle	late
TCTCGC	6.52655	1.68082	8.10913	5ssExonicRegion	Exclusion	kcl	late	-0.150577	0	1.03518	5ssExonicRegion	Exclusion	shuffle	late
TCGGAT	6.52655	1.68082	8.10913	5ssExonicRegion	Exclusion	kcl	late	1.52804	0.475197	2.07684	5ssExonicRegion	Exclusion	shuffle	late
CGAGCA	6.52655	1.68082	8.10913	5ssExonicRegion	Exclusion	kcl	late	-1.78484	0.539676	0.343606	5ssExonicRegion	Exclusion	shuffle	late
ACATGT	6.09204	2.14673	4.75044	5ssExonicRegion	Exclusion	kcl	late	2.78407	0.965187	2.25986	5ssExonicRegion	Exclusion	shuffle	late
TGTATG	6.09204	2.14673	4.75044	5ssExonicRegion	Exclusion	kcl	late	0.667838	0.205923	1.33389	5ssExonicRegion	Exclusion	shuffle	late
CAGGAC	6.05629	2.82457	2.64927	5ssExonicRegion	Exclusion	kcl	late	-1.06798	0.410075	0.77115	5ssExonicRegion	Exclusion	shuffle	late
CTACGA	6.03807	1.66348	5.07361	5ssExonicRegion	Exclusion	kcl	late	-0.954126	0	0.827263	5ssExonicRegion	Exclusion	shuffle	late
GGGCCG	6.03807	1.90605	5.58684	5ssExonicRegion	Exclusion	kcl	late	2.35792	0.765859	2.34154	5ssExonicRegion	Exclusion	shuffle	late
CGGGAA	6.03807	1.90605	5.58684	5ssExonicRegion	Exclusion	kcl	late	-1.87995	0.679258	0.467629	5ssExonicRegion	Exclusion	shuffle	late
GGTGGG	5.78061	2.16986	4.07619	5ssExonicRegion	Exclusion	kcl	late	-1.49628	0.445822	0.600783	5ssExonicRegion	Exclusion	shuffle	late
GGTGGA	5.53633	2.45174	2.95995	5ssExonicRegion	Exclusion	kcl	late	0.268691	0.0580396	1.08872	5ssExonicRegion	Exclusion	shuffle	late
CGTGTT	5.52342	1.41854	7.08805	5ssExonicRegion	Exclusion	kcl	late	0.353273	0.141669	1.38161	5ssExonicRegion	Exclusion	shuffle	late
GACGCT	5.52342	1.41854	7.08805	5ssExonicRegion	Exclusion	kcl	late	4.00528	1.21727	4.16684	5ssExonicRegion	Exclusion	shuffle	late
CGATAG	5.52342	1.41854	7.08805	5ssExonicRegion	Exclusion	kcl	late	-1.20294	0.162861	0.516472	5ssExonicRegion	Exclusion	shuffle	late
CGTTCA	5.52342	1.41854	7.08805	5ssExonicRegion	Exclusion	kcl	late	-2.24085	0.962659	0.257173	5ssExonicRegion	Exclusion	shuffle	late
TCCGAC	5.52342	1.41854	7.08805	5ssExonicRegion	Exclusion	kcl	late	-0.234111	0	1.03511	5ssExonicRegion	Exclusion	shuffle	late
CCGACA	5.52342	1.41854	7.08805	5ssExonicRegion	Exclusion	kcl	late	0.323146	0.125268	1.29531	5ssExonicRegion	Exclusion	shuffle	late
TCGCTC	5.52342	1.41854	7.08805	5ssExonicRegion	Exclusion	kcl	late	0.940656	0.301104	1.72886	5ssExonicRegion	Exclusion	shuffle	late
CATCGC	5.52342	1.41854	7.08805	5ssExonicRegion	Exclusion	kcl	late	-2.20019	0.90412	0.171621	5ssExonicRegion	Exclusion	shuffle	late
TTATTG	5.52342	1.41854	7.08805	5ssExonicRegion	Exclusion	kcl	late	1.52804	0.475197	2.07684	5ssExonicRegion	Exclusion	shuffle	late
CATAGG	5.52342	1.41854	7.08805	5ssExonicRegion	Exclusion	kcl	late	0.353273	0.141669	1.38161	5ssExonicRegion	Exclusion	shuffle	late
GCGACC	5.52342	1.41854	7.08805	5ssExonicRegion	Exclusion	kcl	late	0.940656	0.301104	1.72886	5ssExonicRegion	Exclusion	shuffle	late
ATCGGA	5.52342	1.41854	7.08805	5ssExonicRegion	Exclusion	kcl	late	-0.694243	0	0.775532	5ssExonicRegion	Exclusion	shuffle	late
GTCAGT	5.51287	1.68948	4.06322	5ssExonicRegion	Exclusion	kcl	late	-0.0663699	0.0909937	1.16595	5ssExonicRegion	Exclusion	shuffle	late
AGCTGT	5.37936	2.31813	2.56445	5ssExonicRegion	Exclusion	kcl	late	-1.48588	0.433136	0.751332	5ssExonicRegion	Exclusion	shuffle	late
CGATGC	5.32874	1.66348	5.07361	5ssExonicRegion	Exclusion	kcl	late	-0.150577	0	1.03518	5ssExonicRegion	Exclusion	shuffle	late
GACCGG	5.32874	1.66348	5.07361	5ssExonicRegion	Exclusion	kcl	late	3.28589	0.987111	3.64209	5ssExonicRegion	Exclusion	shuffle	late
TTGGCG	5.32874	1.66348	5.07361	5ssExonicRegion	Exclusion	kcl	late	-0.870356	0.111198	0.737892	5ssExonicRegion	Exclusion	shuffle	late
GGACGA	5.27903	1.95081	3.81739	5ssExonicRegion	Exclusion	kcl	late	-0.695579	0.0892939	0.826524	5ssExonicRegion	Exclusion	shuffle	late
GGAATC	5.27903	1.95081	3.81739	5ssExonicRegion	Exclusion	kcl	late	-0.652842	0.0843861	0.845338	5ssExonicRegion	Exclusion	shuffle	late
CAGACC	5.20193	2.08102	2.72643	5ssExonicRegion	Exclusion	kcl	late	3.16538	1.03669	1.98636	5ssExonicRegion	Exclusion	shuffle	late
AGGCCC	5.16053	2.19242	2.93937	5ssExonicRegion	Exclusion	kcl	late	0.00188425	0	1.03556	5ssExonicRegion	Exclusion	shuffle	late
AGCAGC	5.1496	2.56241	2.11107	5ssExonicRegion	Exclusion	kcl	late	0.463404	0.0972967	1.07078	5ssExonicRegion	Exclusion	shuffle	late
CTGGTG	5.08975	2.31813	2.56445	5ssExonicRegion	Exclusion	kcl	late	-0.577629	0.119381	0.897828	5ssExonicRegion	Exclusion	shuffle	late
ATCAGC	4.937	2.15882	2.66118	5ssExonicRegion	Exclusion	kcl	late	-1.68268	0.617861	0.653489	5ssExonicRegion	Exclusion	shuffle	late
GTAGCT	4.93371	1.68948	4.06322	5ssExonicRegion	Exclusion	kcl	late	-0.0825578	0	1.03529	5ssExonicRegion	Exclusion	shuffle	late
ACTCGG	4.93371	1.68948	4.06322	5ssExonicRegion	Exclusion	kcl	late	-1.33907	0.343258	0.61857	5ssExonicRegion	Exclusion	shuffle	late
GCCCCG	4.93371	1.68948	4.06322	5ssExonicRegion	Exclusion	kcl	late	0.759412	0.241177	1.45235	5ssExonicRegion	Exclusion	shuffle	late
GAAGAT	4.80014	2.14722	2.47631	5ssExonicRegion	Exclusion	kcl	late	-1.38931	0.460106	0.728222	5ssExonicRegion	Exclusion	shuffle	late
AGATCC	4.70917	2.06464	2.51236	5ssExonicRegion	Exclusion	kcl	late	0.51203	0.13227	1.15998	5ssExonicRegion	Exclusion	shuffle	late
GCAGGA	4.63779	1.88992	2.05189	5ssExonicRegion	Exclusion	kcl	late	-0.614912	0	0.964954	5ssExonicRegion	Exclusion	shuffle	late
CAGCAG	4.63669	2.23333	1.82738	5ssExonicRegion	Exclusion	kcl	late	0.929735	0.181832	1.11615	5ssExonicRegion	Exclusion	shuffle	late
GACTGG	4.61975	1.98272	2.55609	5ssExonicRegion	Exclusion	kcl	late	-1.17313	0.326453	0.743967	5ssExonicRegion	Exclusion	shuffle	late
AACTCG	4.61942	1.42581	4.56145	5ssExonicRegion	Exclusion	kcl	late	-1.52142	0.412243	0.515442	5ssExonicRegion	Exclusion	shuffle	late
CGGATC	4.61942	1.42581	4.56145	5ssExonicRegion	Exclusion	kcl	late	-0.954126	0.122842	0.688676	5ssExonicRegion	Exclusion	shuffle	late
ATAAGT	4.61942	1.42581	4.56145	5ssExonicRegion	Exclusion	kcl	late	2.5665	0.764954	3.11846	5ssExonicRegion	Exclusion	shuffle	late
CTCTCG	4.61942	1.42581	4.56145	5ssExonicRegion	Exclusion	kcl	late	0.304418	0.113365	1.24354	5ssExonicRegion	Exclusion	shuffle	late
CGTTGG	4.61942	1.42581	4.56145	5ssExonicRegion	Exclusion	kcl	late	0.759412	0.241177	1.45235	5ssExonicRegion	Exclusion	shuffle	late
ACACAG	4.55738	2.07707	2.2569	5ssExonicRegion	Exclusion	kcl	late	-1.12177	0.338133	0.791733	5ssExonicRegion	Exclusion	shuffle	late
GCATCT	4.45116	1.82175	2.67806	5ssExonicRegion	Exclusion	kcl	late	-0.75271	0.148644	0.83871	5ssExonicRegion	Exclusion	shuffle	late
ACCTCA	4.40669	1.89524	2.41672	5ssExonicRegion	Exclusion	kcl	late	1.84091	0.609712	1.53037	5ssExonicRegion	Exclusion	shuffle	late
AGCCCA	4.40131	1.60896	1.93372	5ssExonicRegion	Exclusion	kcl	late	-0.29872	0.108726	0.917906	5ssExonicRegion	Exclusion	shuffle	late
CCATAG	4.35454	1.46827	3.7207	5ssExonicRegion	Exclusion	kcl	late	-1.08381	0.217084	0.688011	5ssExonicRegion	Exclusion	shuffle	late
GGGTGT	4.35454	1.46827	3.7207	5ssExonicRegion	Exclusion	kcl	late	-0.80199	0.102265	0.774813	5ssExonicRegion	Exclusion	shuffle	late
GACTGC	4.31548	1.47894	2.71182	5ssExonicRegion	Exclusion	kcl	late	0.574262	0.0779967	1.13075	5ssExonicRegion	Exclusion	shuffle	late
ACGTGG	4.27587	1.52701	3.30142	5ssExonicRegion	Exclusion	kcl	late	-1.87995	0.679258	0.467629	5ssExonicRegion	Exclusion	shuffle	late
AGGTTC	4.27587	1.52701	3.30142	5ssExonicRegion	Exclusion	kcl	late	2.57939	0.866795	2.29206	5ssExonicRegion	Exclusion	shuffle	late
GCAGCG	4.27587	1.52701	3.30142	5ssExonicRegion	Exclusion	kcl	late	-1.26639	0.318959	0.65608	5ssExonicRegion	Exclusion	shuffle	late
GACGGC	4.27587	1.91581	4.40647	5ssExonicRegion	Exclusion	kcl	late	0.667838	0.350822	1.55782	5ssExonicRegion	Exclusion	shuffle	late
GGCCTC	4.19872	1.72663	2.49391	5ssExonicRegion	Exclusion	kcl	late	-2.06772	0.870415	0.539854	5ssExonicRegion	Exclusion	shuffle	late
TACAGC	4.09648	1.6431	2.54782	5ssExonicRegion	Exclusion	kcl	late	0.547339	0.151598	1.19736	5ssExonicRegion	Exclusion	shuffle	late
TGGTGG	4.05522	1.88992	2.05189	5ssExonicRegion	Exclusion	kcl	late	0.276708	0.169807	1.16407	5ssExonicRegion	Exclusion	shuffle	late
TCCAGC	4.04068	1.65862	1.9872	5ssExonicRegion	Exclusion	kcl	late	0.674371	0.235678	1.20696	5ssExonicRegion	Exclusion	shuffle	late
GAGATC	3.90594	1.47894	2.71182	5ssExonicRegion	Exclusion	kcl	late	-0.863656	0.169514	0.793965	5ssExonicRegion	Exclusion	shuffle	late
AGTCCA	3.90594	1.47894	2.71182	5ssExonicRegion	Exclusion	kcl	late	-1.04899	0.254902	0.756152	5ssExonicRegion	Exclusion	shuffle	late
GCAGCT	3.86008	1.60817	1.85461	5ssExonicRegion	Exclusion	kcl	late	0.873942	0.166337	1.15932	5ssExonicRegion	Exclusion	shuffle	late
GAATCT	3.82728	1.39946	2.84435	5ssExonicRegion	Exclusion	kcl	late	1.49459	0.363763	1.41801	5ssExonicRegion	Exclusion	shuffle	late
CAGCTA	3.82728	1.39946	2.84435	5ssExonicRegion	Exclusion	kcl	late	0.611924	0.182193	1.26812	5ssExonicRegion	Exclusion	shuffle	late
CTTTCC	3.80171	1.56898	2.22606	5ssExonicRegion	Exclusion	kcl	late	2.16825	0.748774	1.64138	5ssExonicRegion	Exclusion	shuffle	late
AGCTTC	3.77885	1.59245	2.1214	5ssExonicRegion	Exclusion	kcl	late	-1.24878	0.381234	0.748455	5ssExonicRegion	Exclusion	shuffle	late
AACTAT	3.77429	1.32324	3.04426	5ssExonicRegion	Exclusion	kcl	late	-2.37744	1.11755	0.342208	5ssExonicRegion	Exclusion	shuffle	late
CCATCG	3.77429	1.32324	3.04426	5ssExonicRegion	Exclusion	kcl	late	-0.405517	0	0.919311	5ssExonicRegion	Exclusion	shuffle	late
CTGTTC	3.7418	1.46929	2.41786	5ssExonicRegion	Exclusion	kcl	late	-0.78627	0.154758	0.825779	5ssExonicRegion	Exclusion	shuffle	late
AGATGA	3.69187	1.51976	1.9249	5ssExonicRegion	Exclusion	kcl	late	0.687847	0.113289	1.1284	5ssExonicRegion	Exclusion	shuffle	late
CCACCT	3.6417	1.50277	2.12562	5ssExonicRegion	Exclusion	kcl	late	0.519182	0.136426	1.16757	5ssExonicRegion	Exclusion	shuffle	late
GGACCC	3.6417	1.50277	2.12562	5ssExonicRegion	Exclusion	kcl	late	0.266687	0.0595414	1.09141	5ssExonicRegion	Exclusion	shuffle	late
AGCAGT	3.6417	1.50277	2.12562	5ssExonicRegion	Exclusion	kcl	late	0.0184584	0	1.03564	5ssExonicRegion	Exclusion	shuffle	late
ATGACC	3.61858	1.38253	2.46973	5ssExonicRegion	Exclusion	kcl	late	2.20603	0.743201	1.93502	5ssExonicRegion	Exclusion	shuffle	late
GAGCCG	3.61858	1.38253	2.46973	5ssExonicRegion	Exclusion	kcl	late	0.267486	0.0779967	1.13075	5ssExonicRegion	Exclusion	shuffle	late
TGGGCA	3.61858	1.38253	2.46973	5ssExonicRegion	Exclusion	kcl	late	-0.863656	0.169514	0.793965	5ssExonicRegion	Exclusion	shuffle	late
GCTTCC	3.55402	1.51976	1.9249	5ssExonicRegion	Exclusion	kcl	late	-0.683351	0.241357	0.846429	5ssExonicRegion	Exclusion	shuffle	late
TGGGGA	3.52991	1.39057	2.26237	5ssExonicRegion	Exclusion	kcl	late	-0.551117	0.0733669	0.885684	5ssExonicRegion	Exclusion	shuffle	late
TGCCAC	3.52991	1.39057	2.26237	5ssExonicRegion	Exclusion	kcl	late	2.10814	0.718402	1.70713	5ssExonicRegion	Exclusion	shuffle	late
ATCTTC	3.52991	1.39057	2.26237	5ssExonicRegion	Exclusion	kcl	late	1.44091	0.453887	1.4748	5ssExonicRegion	Exclusion	shuffle	late
GACAGA	3.5212	1.53336	2.04287	5ssExonicRegion	Exclusion	kcl	late	2.23953	0.80986	1.63399	5ssExonicRegion	Exclusion	shuffle	late
CCCATC	3.50059	1.65763	2.21301	5ssExonicRegion	Exclusion	kcl	late	2.89178	0.961172	1.74473	5ssExonicRegion	Exclusion	shuffle	late
AGTGCT	3.50059	1.65763	2.21301	5ssExonicRegion	Exclusion	kcl	late	-1.03184	0.381234	0.748455	5ssExonicRegion	Exclusion	shuffle	late
CCTCAA	3.49923	1.64307	2.34659	5ssExonicRegion	Exclusion	kcl	late	1.0805	0.43523	1.4415	5ssExonicRegion	Exclusion	shuffle	late
GTGGAC	3.49923	1.41257	2.13103	5ssExonicRegion	Exclusion	kcl	late	-1.24878	0.381234	0.748455	5ssExonicRegion	Exclusion	shuffle	late
TTCCAG	3.48189	1.40739	1.73611	5ssExonicRegion	Exclusion	kcl	late	2.91957	1.13046	1.59726	5ssExonicRegion	Exclusion	shuffle	late
CCTGGT	3.37496	1.38924	1.9678	5ssExonicRegion	Exclusion	kcl	late	-2.36584	1.14867	0.563628	5ssExonicRegion	Exclusion	shuffle	late
CACCTG	3.36469	1.43161	1.83001	5ssExonicRegion	Exclusion	kcl	late	-0.702505	0.173886	0.878704	5ssExonicRegion	Exclusion	shuffle	late
TCCACC	3.35077	1.32174	2.13798	5ssExonicRegion	Exclusion	kcl	late	1.39394	0.43523	1.4415	5ssExonicRegion	Exclusion	shuffle	late
TGTTCC	3.35077	1.32174	2.13798	5ssExonicRegion	Exclusion	kcl	late	-0.75271	0.148644	0.83871	5ssExonicRegion	Exclusion	shuffle	late
CTCAGC	3.26216	1.34013	1.90468	5ssExonicRegion	Exclusion	kcl	late	0.266687	0.0595414	1.09141	5ssExonicRegion	Exclusion	shuffle	late
TGAAGC	3.2189	1.51976	1.9249	5ssExonicRegion	Exclusion	kcl	late	0.269851	0.118705	1.1369	5ssExonicRegion	Exclusion	shuffle	late
AGCAGG	3.21856	1.31387	1.65406	5ssExonicRegion	Exclusion	kcl	late	-1.13073	0.400646	0.795395	5ssExonicRegion	Exclusion	shuffle	late
TGCATC	3.19674	1.72663	2.49391	5ssExonicRegion	Exclusion	kcl	late	-0.933293	0.234046	0.788552	5ssExonicRegion	Exclusion	shuffle	late
GGCAGC	3.13451	1.47402	1.87482	5ssExonicRegion	Exclusion	kcl	late	-1.06798	0.247164	0.839587	5ssExonicRegion	Exclusion	shuffle	late
CCTGAC	3.10682	1.44319	2.04064	5ssExonicRegion	Exclusion	kcl	late	0.733569	0.124955	1.14722	5ssExonicRegion	Exclusion	shuffle	late
CAGTGG	2.98242	1.38481	1.86275	5ssExonicRegion	Exclusion	kcl	late	-0.647629	0.0499925	0.959963	5ssExonicRegion	Exclusion	shuffle	late
TCTTCA	2.68828	1.52956	1.78256	5ssExonicRegion	Exclusion	kcl	late	0.657726	0.293363	1.19473	5ssExonicRegion	Exclusion	shuffle	late
CTGGGC	10.8227	5.54598	1.77034	5ssIntronicRegion	Exclusion	kcl	early	-0.494572	0	0.99945	5ssIntronicRegion	Exclusion	shuffle	early
TCGATA	9.22279	2.19498	10.5734	5ssIntronicRegion	Exclusion	kcl	early	-0.65789	0.104383	0.82384	5ssIntronicRegion	Exclusion	shuffle	early
GGGTGG	8.33297	4.87765	1.67227	5ssIntronicRegion	Exclusion	kcl	early	-0.666531	0.348961	0.910486	5ssIntronicRegion	Exclusion	shuffle	early
GCTCGA	8.24684	1.92917	9.60332	5ssIntronicRegion	Exclusion	kcl	early	-0.65789	0.104383	0.82384	5ssIntronicRegion	Exclusion	shuffle	early
CTCCCT	7.60505	2.59492	1.42652	5ssIntronicRegion	Exclusion	kcl	early	-4.00875	0.0653422	0.975048	5ssIntronicRegion	Exclusion	shuffle	early
TGGGAC	7.58235	4.33546	1.84575	5ssIntronicRegion	Exclusion	kcl	early	-1.81774	0.180847	0.927816	5ssIntronicRegion	Exclusion	shuffle	early
TCCCTC	7.57035	1.93415	1.38741	5ssIntronicRegion	Exclusion	kcl	early	-3.97023	0.389786	0.896401	5ssIntronicRegion	Exclusion	shuffle	early
CCGCGA	7.27089	1.40708	7.66851	5ssIntronicRegion	Exclusion	kcl	early	0.658823	0	1.20379	5ssIntronicRegion	Exclusion	shuffle	early
GGCCCC	7.19929	3.35841	1.71233	5ssIntronicRegion	Exclusion	kcl	early	-1.83494	0.448419	0.86181	5ssIntronicRegion	Exclusion	shuffle	early
GGCTGG	7.18892	3.19579	1.48764	5ssIntronicRegion	Exclusion	kcl	early	0.721647	0.525606	1.12915	5ssIntronicRegion	Exclusion	shuffle	early
CCTGGG	6.88737	4.11872	1.56396	5ssIntronicRegion	Exclusion	kcl	early	-2.38651	0.794229	0.85172	5ssIntronicRegion	Exclusion	shuffle	early
CCCTCC	6.81579	2.21624	1.38457	5ssIntronicRegion	Exclusion	kcl	early	-3.23398	0.140646	0.95524	5ssIntronicRegion	Exclusion	shuffle	early
GGGCTG	6.77642	2.37364	1.41792	5ssIntronicRegion	Exclusion	kcl	early	1.79567	0.878172	1.20562	5ssIntronicRegion	Exclusion	shuffle	early
GTGGGG	6.55114	3.66722	1.54303	5ssIntronicRegion	Exclusion	kcl	early	-0.438244	0.0892223	0.968415	5ssIntronicRegion	Exclusion	shuffle	early
CCAGGC	6.51894	3.54168	1.59716	5ssIntronicRegion	Exclusion	kcl	early	0.0302671	0.0712619	1.02895	5ssIntronicRegion	Exclusion	shuffle	early
CCCGCG	6.49026	1.71341	3.60751	5ssIntronicRegion	Exclusion	kcl	early	0.702124	0.624402	1.93488	5ssIntronicRegion	Exclusion	shuffle	early
ACCCTG	6.40823	3.14212	1.60222	5ssIntronicRegion	Exclusion	kcl	early	0.77441	0.0765054	1.03113	5ssIntronicRegion	Exclusion	shuffle	early
GTGGAG	6.30912	3.57536	1.66782	5ssIntronicRegion	Exclusion	kcl	early	1.43383	0.236297	1.08464	5ssIntronicRegion	Exclusion	shuffle	early
CCTCCT	6.09215	3.00547	1.46514	5ssIntronicRegion	Exclusion	kcl	early	0.287029	0.0864746	1.0321	5ssIntronicRegion	Exclusion	shuffle	early
CTCCGC	6.02699	3.18007	2.73346	5ssIntronicRegion	Exclusion	kcl	early	0.0925164	0.0508452	1.07981	5ssIntronicRegion	Exclusion	shuffle	early
AGGCCT	5.98458	3.10688	1.61703	5ssIntronicRegion	Exclusion	kcl	early	-0.825362	0.138591	0.948514	5ssIntronicRegion	Exclusion	shuffle	early
CAGCCT	5.91552	2.14124	1.36285	5ssIntronicRegion	Exclusion	kcl	early	-0.166929	0.217172	0.942137	5ssIntronicRegion	Exclusion	shuffle	early
CCTCGA	5.91478	2.34238	2.5389	5ssIntronicRegion	Exclusion	kcl	early	2.64557	1.07225	1.67656	5ssIntronicRegion	Exclusion	shuffle	early
GGGACT	5.75679	2.99718	1.64386	5ssIntronicRegion	Exclusion	kcl	early	-0.443588	0.0544394	0.969026	5ssIntronicRegion	Exclusion	shuffle	early
TGGGGG	5.75328	2.78857	1.48715	5ssIntronicRegion	Exclusion	kcl	early	-0.179802	0.180472	1.06009	5ssIntronicRegion	Exclusion	shuffle	early
CCTCCC	5.74406	2.90251	1.45135	5ssIntronicRegion	Exclusion	kcl	early	-2.4515	0.136775	1.04753	5ssIntronicRegion	Exclusion	shuffle	early
TGGGGC	5.74232	2.98139	1.55113	5ssIntronicRegion	Exclusion	kcl	early	0.765345	0.293899	1.09222	5ssIntronicRegion	Exclusion	shuffle	early
CCCTCT	5.73988	2.69938	1.46161	5ssIntronicRegion	Exclusion	kcl	early	-0.992219	0.266978	0.927673	5ssIntronicRegion	Exclusion	shuffle	early
CCTAAG	5.73401	2.92158	1.80004	5ssIntronicRegion	Exclusion	kcl	early	2.76334	1.22896	1.42011	5ssIntronicRegion	Exclusion	shuffle	early
CAGGGT	5.72523	3.01949	1.5232	5ssIntronicRegion	Exclusion	kcl	early	0.949927	0.503339	1.1392	5ssIntronicRegion	Exclusion	shuffle	early
AAGGCG	5.54698	2.39739	2.9044	5ssIntronicRegion	Exclusion	kcl	early	-1.35359	0.389625	0.729181	5ssIntronicRegion	Exclusion	shuffle	early
GGGGCT	5.51518	2.33921	1.44323	5ssIntronicRegion	Exclusion	kcl	early	0.180077	0	0.996422	5ssIntronicRegion	Exclusion	shuffle	early
GGCCTC	5.41715	3.59948	1.67523	5ssIntronicRegion	Exclusion	kcl	early	-1.69583	0.536419	0.858665	5ssIntronicRegion	Exclusion	shuffle	early
GCCCCT	5.39208	2.98139	1.55113	5ssIntronicRegion	Exclusion	kcl	early	1.10799	0.297753	1.09533	5ssIntronicRegion	Exclusion	shuffle	early
CTCGAG	5.37341	2.34238	2.5389	5ssIntronicRegion	Exclusion	kcl	early	-1.06182	0.252091	0.810401	5ssIntronicRegion	Exclusion	shuffle	early
CACCTC	5.28458	1.71427	1.42619	5ssIntronicRegion	Exclusion	kcl	early	-0.733458	0.288276	0.90912	5ssIntronicRegion	Exclusion	shuffle	early
CCTCAG	5.27659	2.74973	1.49768	5ssIntronicRegion	Exclusion	kcl	early	0.887616	0.281664	1.09044	5ssIntronicRegion	Exclusion	shuffle	early
CAGGGA	5.22475	2.01267	1.40471	5ssIntronicRegion	Exclusion	kcl	early	1.03756	0.156793	1.05879	5ssIntronicRegion	Exclusion	shuffle	early
ACCGGG	5.21056	2.14852	2.89907	5ssIntronicRegion	Exclusion	kcl	early	-1.18035	0.221881	0.799129	5ssIntronicRegion	Exclusion	shuffle	early
TCTCCG	5.16494	2.34238	2.5389	5ssIntronicRegion	Exclusion	kcl	early	0.531522	0.328049	1.24326	5ssIntronicRegion	Exclusion	shuffle	early
CCTGAC	5.14426	2.17556	1.51023	5ssIntronicRegion	Exclusion	kcl	early	0.977508	0.0260301	1.02157	5ssIntronicRegion	Exclusion	shuffle	early
CTCTCT	5.13999	1.40614	1.28184	5ssIntronicRegion	Exclusion	kcl	early	1.747	0.221833	0.935714	5ssIntronicRegion	Exclusion	shuffle	early
CCTTCC	5.05033	2.37518	1.39163	5ssIntronicRegion	Exclusion	kcl	early	-1.39075	0.784497	0.846075	5ssIntronicRegion	Exclusion	shuffle	early
CACGAC	5.02633	1.71341	3.60751	5ssIntronicRegion	Exclusion	kcl	early	2.50893	0.778146	2.09808	5ssIntronicRegion	Exclusion	shuffle	early
TCCCAG	5.0172	3.03821	1.47386	5ssIntronicRegion	Exclusion	kcl	early	-0.20982	0.137798	0.954846	5ssIntronicRegion	Exclusion	shuffle	early
TGGCCC	5.00686	2.57733	1.51762	5ssIntronicRegion	Exclusion	kcl	early	0.944724	0.818517	1.22121	5ssIntronicRegion	Exclusion	shuffle	early
GGCCTA	4.99443	2.34626	1.82306	5ssIntronicRegion	Exclusion	kcl	early	-2.43438	1.12318	0.675399	5ssIntronicRegion	Exclusion	shuffle	early
CTGCGG	4.97724	2.18526	2.32968	5ssIntronicRegion	Exclusion	kcl	early	-0.860582	0.173249	0.852096	5ssIntronicRegion	Exclusion	shuffle	early
CGAGGC	4.90411	1.94456	2.28383	5ssIntronicRegion	Exclusion	kcl	early	0.122418	0.18176	1.149	5ssIntronicRegion	Exclusion	shuffle	early
AGCCTC	4.90094	2.65095	1.52416	5ssIntronicRegion	Exclusion	kcl	early	0.41392	0.134829	1.05117	5ssIntronicRegion	Exclusion	shuffle	early
CCCAGA	4.8802	2.3739	1.47762	5ssIntronicRegion	Exclusion	kcl	early	-1.24167	0.379222	0.889995	5ssIntronicRegion	Exclusion	shuffle	early
CCGGGC	4.8695	1.65917	1.85102	5ssIntronicRegion	Exclusion	kcl	early	0.19639	0.045285	0.961101	5ssIntronicRegion	Exclusion	shuffle	early
GGTGGG	4.83359	1.92205	1.34266	5ssIntronicRegion	Exclusion	kcl	early	-0.870104	0.486535	0.887215	5ssIntronicRegion	Exclusion	shuffle	early
AGCCCT	4.81751	2.17951	1.42901	5ssIntronicRegion	Exclusion	kcl	early	-1.79577	0.577686	0.862688	5ssIntronicRegion	Exclusion	shuffle	early
CTGGGG	4.79191	1.45497	1.26688	5ssIntronicRegion	Exclusion	kcl	early	2.42201	1.08883	1.22134	5ssIntronicRegion	Exclusion	shuffle	early
GCCTCC	4.77285	2.98839	1.53046	5ssIntronicRegion	Exclusion	kcl	early	0.685201	0.390612	1.11705	5ssIntronicRegion	Exclusion	shuffle	early
CCACCC	4.70522	2.42015	1.45315	5ssIntronicRegion	Exclusion	kcl	early	3.18593	0.517838	1.14811	5ssIntronicRegion	Exclusion	shuffle	early
CCCTGA	4.67874	2.79544	1.55319	5ssIntronicRegion	Exclusion	kcl	early	2.04978	0.725505	1.20677	5ssIntronicRegion	Exclusion	shuffle	early
GACTCC	4.65697	1.73523	1.53106	5ssIntronicRegion	Exclusion	kcl	early	-0.25762	0.104839	0.944191	5ssIntronicRegion	Exclusion	shuffle	early
CCCCAG	4.65191	2.67949	1.45018	5ssIntronicRegion	Exclusion	kcl	early	0.932037	0.117838	1.04346	5ssIntronicRegion	Exclusion	shuffle	early
AGGGTG	4.64638	1.58071	1.32981	5ssIntronicRegion	Exclusion	kcl	early	1.58878	0.783291	1.19674	5ssIntronicRegion	Exclusion	shuffle	early
TCCAGG	4.63897	2.31596	1.47568	5ssIntronicRegion	Exclusion	kcl	early	1.90667	0.838017	1.22427	5ssIntronicRegion	Exclusion	shuffle	early
GAACCC	4.6344	2.03048	1.63935	5ssIntronicRegion	Exclusion	kcl	early	0.778689	0.147143	1.08139	5ssIntronicRegion	Exclusion	shuffle	early
CTCAGT	4.63189	2.11233	1.40719	5ssIntronicRegion	Exclusion	kcl	early	-1.53547	0.640676	0.854758	5ssIntronicRegion	Exclusion	shuffle	early
TTCCGA	4.62968	1.93927	2.51236	5ssIntronicRegion	Exclusion	kcl	early	1.49745	0.490626	1.41984	5ssIntronicRegion	Exclusion	shuffle	early
CTGACT	4.62881	2.88899	1.53991	5ssIntronicRegion	Exclusion	kcl	early	1.66982	0.818662	1.21434	5ssIntronicRegion	Exclusion	shuffle	early
GCAGGG	4.62421	2.02333	1.40835	5ssIntronicRegion	Exclusion	kcl	early	1.27364	0.157946	1.06026	5ssIntronicRegion	Exclusion	shuffle	early
TGGGCA	4.5901	2.50351	1.48598	5ssIntronicRegion	Exclusion	kcl	early	0.430036	0.0747456	1.02773	5ssIntronicRegion	Exclusion	shuffle	early
CCCAGG	4.58564	2.4403	1.40969	5ssIntronicRegion	Exclusion	kcl	early	0.124318	0.221256	1.06433	5ssIntronicRegion	Exclusion	shuffle	early
GCCCTC	4.57976	2.00029	1.46944	5ssIntronicRegion	Exclusion	kcl	early	1.35368	0.685381	1.21065	5ssIntronicRegion	Exclusion	shuffle	early
TCCGGC	4.57102	1.36501	2.24635	5ssIntronicRegion	Exclusion	kcl	early	-1.37842	0.140988	0.84696	5ssIntronicRegion	Exclusion	shuffle	early
CCCTCG	4.56876	1.88282	1.98965	5ssIntronicRegion	Exclusion	kcl	early	0.612684	0.100367	1.10278	5ssIntronicRegion	Exclusion	shuffle	early
GGCCGG	4.54881	1.7876	1.89689	5ssIntronicRegion	Exclusion	kcl	early	1.74315	0.281547	1.2096	5ssIntronicRegion	Exclusion	shuffle	early
ATCGGG	4.52046	1.7875	2.65252	5ssIntronicRegion	Exclusion	kcl	early	-0.741189	0.136409	0.853201	5ssIntronicRegion	Exclusion	shuffle	early
AGCACA	4.5112	2.03207	1.45362	5ssIntronicRegion	Exclusion	kcl	early	0.738035	0.138963	1.05678	5ssIntronicRegion	Exclusion	shuffle	early
ACAGGG	4.49341	2.16194	1.4576	5ssIntronicRegion	Exclusion	kcl	early	-0.911303	0.306848	0.905129	5ssIntronicRegion	Exclusion	shuffle	early
ACCCCA	4.47591	1.78837	1.39784	5ssIntronicRegion	Exclusion	kcl	early	1.72657	0.674465	1.19617	5ssIntronicRegion	Exclusion	shuffle	early
GACCAG	4.47009	2.22319	1.58826	5ssIntronicRegion	Exclusion	kcl	early	1.47948	0.327237	1.13387	5ssIntronicRegion	Exclusion	shuffle	early
CTTCCT	4.46904	1.4527	1.2602	5ssIntronicRegion	Exclusion	kcl	early	0.193112	0.59153	0.883171	5ssIntronicRegion	Exclusion	shuffle	early
CCCCTC	4.46461	2.18635	1.40945	5ssIntronicRegion	Exclusion	kcl	early	-1.21402	0.315624	0.911094	5ssIntronicRegion	Exclusion	shuffle	early
CACCCT	4.45403	2.7933	1.57138	5ssIntronicRegion	Exclusion	kcl	early	0.278575	0.173945	1.07063	5ssIntronicRegion	Exclusion	shuffle	early
CCTGCT	4.44532	1.81794	1.34184	5ssIntronicRegion	Exclusion	kcl	early	1.3165	0.320079	1.09089	5ssIntronicRegion	Exclusion	shuffle	early
GCCTGG	4.43874	2.91545	1.47353	5ssIntronicRegion	Exclusion	kcl	early	0.685981	0.115538	1.03996	5ssIntronicRegion	Exclusion	shuffle	early
CTCCTG	4.41788	2.38407	1.37628	5ssIntronicRegion	Exclusion	kcl	early	-1.00153	0.430997	0.901708	5ssIntronicRegion	Exclusion	shuffle	early
TAGGAC	4.39872	2.12518	1.73126	5ssIntronicRegion	Exclusion	kcl	early	1.18486	0.258174	1.14686	5ssIntronicRegion	Exclusion	shuffle	early
CCTCTC	4.39683	1.85262	1.34552	5ssIntronicRegion	Exclusion	kcl	early	-2.78222	0.512468	0.88258	5ssIntronicRegion	Exclusion	shuffle	early
GGCAGG	4.39683	2.52447	1.43973	5ssIntronicRegion	Exclusion	kcl	early	2.27439	0.655823	1.17066	5ssIntronicRegion	Exclusion	shuffle	early
TCCCTA	4.38931	2.14558	1.56335	5ssIntronicRegion	Exclusion	kcl	early	-0.185716	0.0295013	0.985919	5ssIntronicRegion	Exclusion	shuffle	early
GGACCC	4.38931	2.24277	1.58057	5ssIntronicRegion	Exclusion	kcl	early	-2.77261	1.17415	0.72647	5ssIntronicRegion	Exclusion	shuffle	early
CTGTGG	4.38766	1.63957	1.30378	5ssIntronicRegion	Exclusion	kcl	early	-0.0366921	0.0640763	1.02046	5ssIntronicRegion	Exclusion	shuffle	early
GGGCCG	4.3453	1.83373	1.94106	5ssIntronicRegion	Exclusion	kcl	early	1.70569	0.430744	1.29274	5ssIntronicRegion	Exclusion	shuffle	early
CTGCCC	4.33678	2.54752	1.44639	5ssIntronicRegion	Exclusion	kcl	early	-0.778583	0.266169	0.927774	5ssIntronicRegion	Exclusion	shuffle	early
TACGTT	4.32106	1.77219	2.41347	5ssIntronicRegion	Exclusion	kcl	early	-1.74897	0.748551	0.607303	5ssIntronicRegion	Exclusion	shuffle	early
TCCTGG	4.30176	2.51709	1.4181	5ssIntronicRegion	Exclusion	kcl	early	0.220678	0.167202	1.05259	5ssIntronicRegion	Exclusion	shuffle	early
TGGCAG	4.2374	2.79627	1.50549	5ssIntronicRegion	Exclusion	kcl	early	-1.30415	0.467677	0.882323	5ssIntronicRegion	Exclusion	shuffle	early
CTCCCA	4.22525	2.36344	1.43513	5ssIntronicRegion	Exclusion	kcl	early	-1.37134	0.72789	0.842854	5ssIntronicRegion	Exclusion	shuffle	early
GGTGGC	4.21615	2.06171	1.4461	5ssIntronicRegion	Exclusion	kcl	early	-1.59746	0.439431	0.877063	5ssIntronicRegion	Exclusion	shuffle	early
CTCCTC	4.20482	1.83957	1.35494	5ssIntronicRegion	Exclusion	kcl	early	1.60613	0.605602	1.15877	5ssIntronicRegion	Exclusion	shuffle	early
AGCTAG	4.18095	1.57521	1.47545	5ssIntronicRegion	Exclusion	kcl	early	-0.50737	0.0631193	0.959526	5ssIntronicRegion	Exclusion	shuffle	early
CGGGCT	4.17828	1.62288	1.99272	5ssIntronicRegion	Exclusion	kcl	early	1.5203	0.431511	1.32457	5ssIntronicRegion	Exclusion	shuffle	early
TGAGCT	4.16856	2.04504	1.41582	5ssIntronicRegion	Exclusion	kcl	early	-0.0242885	0	0.998233	5ssIntronicRegion	Exclusion	shuffle	early
CCAGGT	4.16306	1.59211	1.39379	5ssIntronicRegion	Exclusion	kcl	early	1.58006	0.326034	1.11924	5ssIntronicRegion	Exclusion	shuffle	early
CCCGCT	4.15383	1.66155	1.9375	5ssIntronicRegion	Exclusion	kcl	early	-0.0998736	0	0.999274	5ssIntronicRegion	Exclusion	shuffle	early
CGAAAG	4.11322	1.53448	2.61329	5ssIntronicRegion	Exclusion	kcl	early	2.09079	0.699359	1.6739	5ssIntronicRegion	Exclusion	shuffle	early
CCCTGG	4.09683	1.50011	1.30235	5ssIntronicRegion	Exclusion	kcl	early	1.38953	0.231217	1.0738	5ssIntronicRegion	Exclusion	shuffle	early
TCCTCA	4.09602	1.59138	1.36713	5ssIntronicRegion	Exclusion	kcl	early	1.19353	0.377734	1.11771	5ssIntronicRegion	Exclusion	shuffle	early
AGGCTG	4.08043	2.40225	1.41221	5ssIntronicRegion	Exclusion	kcl	early	1.17899	0.259708	1.07915	5ssIntronicRegion	Exclusion	shuffle	early
GCCACC	4.07706	1.46891	1.36002	5ssIntronicRegion	Exclusion	kcl	early	-2.62616	0.940173	0.795624	5ssIntronicRegion	Exclusion	shuffle	early
ACCTTC	4.07293	1.45865	1.43185	5ssIntronicRegion	Exclusion	kcl	early	1.08303	0.209115	1.10188	5ssIntronicRegion	Exclusion	shuffle	early
CCTCGG	4.05829	1.95732	1.90409	5ssIntronicRegion	Exclusion	kcl	early	-0.475971	0.0929033	0.932682	5ssIntronicRegion	Exclusion	shuffle	early
CTGAGT	4.03907	1.67342	1.3482	5ssIntronicRegion	Exclusion	kcl	early	0.540285	0.0462761	1.02043	5ssIntronicRegion	Exclusion	shuffle	early
GCCCGC	4.03776	1.31485	1.82474	5ssIntronicRegion	Exclusion	kcl	early	1.08304	0.110738	1.08995	5ssIntronicRegion	Exclusion	shuffle	early
AGCCGC	4.01999	2.18404	2.5522	5ssIntronicRegion	Exclusion	kcl	early	-0.488744	0	0.961502	5ssIntronicRegion	Exclusion	shuffle	early
GACACT	4.01532	1.5407	1.44791	5ssIntronicRegion	Exclusion	kcl	early	0.745744	0.329497	1.13601	5ssIntronicRegion	Exclusion	shuffle	early
CTGGCC	4.00852	2.60525	1.44895	5ssIntronicRegion	Exclusion	kcl	early	-0.186899	0.0933206	1.03805	5ssIntronicRegion	Exclusion	shuffle	early
GTTCCC	3.98951	2.24277	1.58057	5ssIntronicRegion	Exclusion	kcl	early	-1.97474	0.546933	0.8366	5ssIntronicRegion	Exclusion	shuffle	early
CGTCCA	3.96927	1.58683	2.06303	5ssIntronicRegion	Exclusion	kcl	early	1.69257	0.599065	1.40614	5ssIntronicRegion	Exclusion	shuffle	early
ACTGCC	3.94938	1.79292	1.4689	5ssIntronicRegion	Exclusion	kcl	early	-0.313118	0.0895847	0.958959	5ssIntronicRegion	Exclusion	shuffle	early
CGGGCC	3.94157	1.35541	1.87531	5ssIntronicRegion	Exclusion	kcl	early	0.083387	0.04992	0.961321	5ssIntronicRegion	Exclusion	shuffle	early
GCCGCC	3.93829	1.36317	1.78874	5ssIntronicRegion	Exclusion	kcl	early	0.595366	0.0498889	1.07532	5ssIntronicRegion	Exclusion	shuffle	early
GCACAA	3.93576	1.66354	1.60827	5ssIntronicRegion	Exclusion	kcl	early	1.06223	0.260994	1.15061	5ssIntronicRegion	Exclusion	shuffle	early
CCGGCC	3.92992	1.40165	1.83206	5ssIntronicRegion	Exclusion	kcl	early	1.27924	0.230339	1.1989	5ssIntronicRegion	Exclusion	shuffle	early
CGCCTC	3.92983	1.74788	1.93928	5ssIntronicRegion	Exclusion	kcl	early	0.0501968	0	1.02949	5ssIntronicRegion	Exclusion	shuffle	early
TGCTCC	3.92968	2.17192	1.46788	5ssIntronicRegion	Exclusion	kcl	early	-0.101633	0	0.996598	5ssIntronicRegion	Exclusion	shuffle	early
TGAACC	3.92256	1.8996	1.63674	5ssIntronicRegion	Exclusion	kcl	early	2.2406	0.838529	1.35185	5ssIntronicRegion	Exclusion	shuffle	early
TCTCCC	3.91259	1.57672	1.32171	5ssIntronicRegion	Exclusion	kcl	early	-2.75149	0.991956	0.809768	5ssIntronicRegion	Exclusion	shuffle	early
AGCCTG	3.91172	2.61552	1.43219	5ssIntronicRegion	Exclusion	kcl	early	1.02936	0.0909826	1.03375	5ssIntronicRegion	Exclusion	shuffle	early
CAGGTG	3.90706	1.87693	1.4136	5ssIntronicRegion	Exclusion	kcl	early	0.236985	0	0.994901	5ssIntronicRegion	Exclusion	shuffle	early
GCCTGT	3.89228	1.55252	1.33456	5ssIntronicRegion	Exclusion	kcl	early	0.310976	0.128214	1.05089	5ssIntronicRegion	Exclusion	shuffle	early
CCCAGC	3.87919	2.48777	1.41001	5ssIntronicRegion	Exclusion	kcl	early	-0.291156	0.113904	0.961715	5ssIntronicRegion	Exclusion	shuffle	early
ATGGAG	3.87488	1.70933	1.43191	5ssIntronicRegion	Exclusion	kcl	early	-1.40536	0.306228	0.894431	5ssIntronicRegion	Exclusion	shuffle	early
TTCACC	3.87441	1.73523	1.53106	5ssIntronicRegion	Exclusion	kcl	early	0.464299	0.0315146	1.02111	5ssIntronicRegion	Exclusion	shuffle	early
CACTAG	3.87039	1.40098	1.51566	5ssIntronicRegion	Exclusion	kcl	early	-0.487846	0.0346753	0.978329	5ssIntronicRegion	Exclusion	shuffle	early
GCAGTG	3.85828	1.61872	1.36725	5ssIntronicRegion	Exclusion	kcl	early	0.0563534	0	1.00345	5ssIntronicRegion	Exclusion	shuffle	early
GGGATG	3.8563	1.30133	1.34399	5ssIntronicRegion	Exclusion	kcl	early	-1.80557	0.334834	0.888588	5ssIntronicRegion	Exclusion	shuffle	early
GGGGTG	3.84473	1.62922	1.34752	5ssIntronicRegion	Exclusion	kcl	early	-0.358676	0.128681	0.957023	5ssIntronicRegion	Exclusion	shuffle	early
TGCTGG	3.83564	2.21436	1.37877	5ssIntronicRegion	Exclusion	kcl	early	1.43989	0.27378	1.07877	5ssIntronicRegion	Exclusion	shuffle	early
CCCACC	3.83549	1.46747	1.31122	5ssIntronicRegion	Exclusion	kcl	early	3.89524	1.25345	1.28336	5ssIntronicRegion	Exclusion	shuffle	early
CGTCAC	3.83035	1.44358	2.40689	5ssIntronicRegion	Exclusion	kcl	early	-2.53068	1.25064	0.451274	5ssIntronicRegion	Exclusion	shuffle	early
TGCCCC	3.78558	1.47827	1.3641	5ssIntronicRegion	Exclusion	kcl	early	1.87639	0.497687	1.16295	5ssIntronicRegion	Exclusion	shuffle	early
GGAGCC	3.78168	2.52205	1.56555	5ssIntronicRegion	Exclusion	kcl	early	0.0290169	0.0547225	1.02475	5ssIntronicRegion	Exclusion	shuffle	early
CCCGAG	3.779	1.58074	1.69336	5ssIntronicRegion	Exclusion	kcl	early	1.6208	0.502193	1.2679	5ssIntronicRegion	Exclusion	shuffle	early
CGCCTG	3.75371	1.37332	1.58146	5ssIntronicRegion	Exclusion	kcl	early	1.85083	0.473054	1.23808	5ssIntronicRegion	Exclusion	shuffle	early
CGAGGT	3.74931	1.55423	2.07909	5ssIntronicRegion	Exclusion	kcl	early	0.376429	0.119012	1.10893	5ssIntronicRegion	Exclusion	shuffle	early
GGACGC	3.74434	1.36049	2.47345	5ssIntronicRegion	Exclusion	kcl	early	2.30829	0.72403	1.93663	5ssIntronicRegion	Exclusion	shuffle	early
ACGGTT	3.74434	1.36049	2.47345	5ssIntronicRegion	Exclusion	kcl	early	0.00839264	0	1.04299	5ssIntronicRegion	Exclusion	shuffle	early
TCCAGC	3.73985	1.69202	1.37846	5ssIntronicRegion	Exclusion	kcl	early	-1.16884	0.16679	0.939784	5ssIntronicRegion	Exclusion	shuffle	early
ACAGCC	3.73543	1.59495	1.37548	5ssIntronicRegion	Exclusion	kcl	early	-1.94443	0.632768	0.842534	5ssIntronicRegion	Exclusion	shuffle	early
GAGCGC	3.71727	1.44658	1.99668	5ssIntronicRegion	Exclusion	kcl	early	0.787107	0.252459	1.19609	5ssIntronicRegion	Exclusion	shuffle	early
GCTCCA	3.7088	1.55001	1.40413	5ssIntronicRegion	Exclusion	kcl	early	0.500581	0.0570334	1.03053	5ssIntronicRegion	Exclusion	shuffle	early
CCTTCA	3.68465	1.55119	1.3761	5ssIntronicRegion	Exclusion	kcl	early	0.751861	0.209801	1.08319	5ssIntronicRegion	Exclusion	shuffle	early
TGGGCG	3.67548	1.42772	1.70469	5ssIntronicRegion	Exclusion	kcl	early	-1.92732	0.617873	0.72939	5ssIntronicRegion	Exclusion	shuffle	early
GTGGGA	3.65976	1.5242	1.33985	5ssIntronicRegion	Exclusion	kcl	early	-2.78623	1.18933	0.782621	5ssIntronicRegion	Exclusion	shuffle	early
CCACCT	3.64933	1.38234	1.32358	5ssIntronicRegion	Exclusion	kcl	early	0.360028	0.135217	0.948661	5ssIntronicRegion	Exclusion	shuffle	early
CTGGGT	3.64599	1.32828	1.29437	5ssIntronicRegion	Exclusion	kcl	early	1.11876	0.476273	1.13924	5ssIntronicRegion	Exclusion	shuffle	early
GGTCTC	3.63931	1.56999	1.43668	5ssIntronicRegion	Exclusion	kcl	early	-0.933621	0.091609	0.959123	5ssIntronicRegion	Exclusion	shuffle	early
GGGCTC	3.6383	1.47827	1.3641	5ssIntronicRegion	Exclusion	kcl	early	2.14325	0.59912	1.1892	5ssIntronicRegion	Exclusion	shuffle	early
GGCCTG	3.62804	2.14533	1.41782	5ssIntronicRegion	Exclusion	kcl	early	0.930963	0.317483	1.09991	5ssIntronicRegion	Exclusion	shuffle	early
TCCTAC	3.62488	1.30815	1.49158	5ssIntronicRegion	Exclusion	kcl	early	-1.47264	0.53337	0.813502	5ssIntronicRegion	Exclusion	shuffle	early
CCCAAG	3.60198	1.61352	1.40325	5ssIntronicRegion	Exclusion	kcl	early	0.707033	0.249143	1.09752	5ssIntronicRegion	Exclusion	shuffle	early
CAGCTA	3.57527	2.06905	1.61217	5ssIntronicRegion	Exclusion	kcl	early	1.28901	0.408079	1.16372	5ssIntronicRegion	Exclusion	shuffle	early
CCCTAT	3.56433	1.39028	1.61558	5ssIntronicRegion	Exclusion	kcl	early	-0.0105287	0	1.01209	5ssIntronicRegion	Exclusion	shuffle	early
CCTACT	3.56028	1.67933	1.53196	5ssIntronicRegion	Exclusion	kcl	early	-0.0105059	0.0321131	0.975342	5ssIntronicRegion	Exclusion	shuffle	early
CTCCAG	3.55581	1.62839	1.3256	5ssIntronicRegion	Exclusion	kcl	early	-0.689612	0.147443	1.04726	5ssIntronicRegion	Exclusion	shuffle	early
GCCTCT	3.52412	1.74866	1.35333	5ssIntronicRegion	Exclusion	kcl	early	-1.89372	0.824996	0.830249	5ssIntronicRegion	Exclusion	shuffle	early
GGTGCC	3.52113	1.44469	1.43408	5ssIntronicRegion	Exclusion	kcl	early	0.516606	0.0614814	1.02853	5ssIntronicRegion	Exclusion	shuffle	early
GCGGAG	3.46528	1.35732	1.99946	5ssIntronicRegion	Exclusion	kcl	early	-1.48997	0.470409	0.706664	5ssIntronicRegion	Exclusion	shuffle	early
GAGCCC	3.3797	1.63851	1.37498	5ssIntronicRegion	Exclusion	kcl	early	-1.86996	0.85687	0.808791	5ssIntronicRegion	Exclusion	shuffle	early
TCCCGA	3.35897	1.31485	1.82474	5ssIntronicRegion	Exclusion	kcl	early	0.0925164	0	1.03726	5ssIntronicRegion	Exclusion	shuffle	early
GCTCAG	3.35721	1.60454	1.33844	5ssIntronicRegion	Exclusion	kcl	early	-0.093569	0.157366	1.05952	5ssIntronicRegion	Exclusion	shuffle	early
CTTAGC	3.3315	2.07901	1.58665	5ssIntronicRegion	Exclusion	kcl	early	-0.391514	0	0.988209	5ssIntronicRegion	Exclusion	shuffle	early
CAGCCC	3.32417	1.41241	1.31205	5ssIntronicRegion	Exclusion	kcl	early	0.137018	0.406854	1.12886	5ssIntronicRegion	Exclusion	shuffle	early
GTGATG	3.29332	1.49307	1.37885	5ssIntronicRegion	Exclusion	kcl	early	-0.540078	0	1.00216	5ssIntronicRegion	Exclusion	shuffle	early
AGTCCT	3.29224	1.32841	1.33633	5ssIntronicRegion	Exclusion	kcl	early	1.76026	0.595771	1.18705	5ssIntronicRegion	Exclusion	shuffle	early
GACAGG	3.29224	1.55119	1.3761	5ssIntronicRegion	Exclusion	kcl	early	-0.189218	0.0252843	0.987476	5ssIntronicRegion	Exclusion	shuffle	early
GAGTGG	3.28989	1.42743	1.33515	5ssIntronicRegion	Exclusion	kcl	early	-1.24779	0.346469	0.896469	5ssIntronicRegion	Exclusion	shuffle	early
CTTGGG	3.27297	1.50672	1.31756	5ssIntronicRegion	Exclusion	kcl	early	2.00163	1.01577	1.24385	5ssIntronicRegion	Exclusion	shuffle	early
GCCTCG	3.27183	1.33778	1.62567	5ssIntronicRegion	Exclusion	kcl	early	2.6439	0.865608	1.43203	5ssIntronicRegion	Exclusion	shuffle	early
CACCTG	3.26356	1.37205	1.33678	5ssIntronicRegion	Exclusion	kcl	early	1.2987	0.241894	1.09017	5ssIntronicRegion	Exclusion	shuffle	early
GCCTAC	3.26215	1.30956	1.53314	5ssIntronicRegion	Exclusion	kcl	early	0.824035	0.215691	1.11429	5ssIntronicRegion	Exclusion	shuffle	early
GGTTCC	3.25799	1.33666	1.46161	5ssIntronicRegion	Exclusion	kcl	early	0.734739	0.104418	1.0591	5ssIntronicRegion	Exclusion	shuffle	early
CTTGTC	3.2434	1.71276	1.3864	5ssIntronicRegion	Exclusion	kcl	early	-0.560418	0.352893	0.894842	5ssIntronicRegion	Exclusion	shuffle	early
CCATTG	3.22777	1.64153	1.42361	5ssIntronicRegion	Exclusion	kcl	early	-1.30869	0.445633	0.862664	5ssIntronicRegion	Exclusion	shuffle	early
TGGAGG	3.22446	1.89708	1.38086	5ssIntronicRegion	Exclusion	kcl	early	0.900297	0.0231944	0.990218	5ssIntronicRegion	Exclusion	shuffle	early
GAGGTG	3.21998	1.48514	1.34853	5ssIntronicRegion	Exclusion	kcl	early	-2.34154	0.972864	0.793919	5ssIntronicRegion	Exclusion	shuffle	early
CCAAGC	3.21012	1.62454	1.46401	5ssIntronicRegion	Exclusion	kcl	early	0.0222074	0.0926111	1.05163	5ssIntronicRegion	Exclusion	shuffle	early
AGAACC	3.20842	1.74022	1.47893	5ssIntronicRegion	Exclusion	kcl	early	-1.76096	0.593684	0.828632	5ssIntronicRegion	Exclusion	shuffle	early
CCCCTT	3.20482	1.5369	1.3287	5ssIntronicRegion	Exclusion	kcl	early	-1.38246	0.565899	0.865297	5ssIntronicRegion	Exclusion	shuffle	early
CCTTGG	3.18309	1.61016	1.35671	5ssIntronicRegion	Exclusion	kcl	early	-0.829457	0.0488344	0.97456	5ssIntronicRegion	Exclusion	shuffle	early
CTCACT	3.16533	1.63851	1.37498	5ssIntronicRegion	Exclusion	kcl	early	-0.302809	0.201677	0.930618	5ssIntronicRegion	Exclusion	shuffle	early
CTCAGC	3.15676	1.86997	1.38093	5ssIntronicRegion	Exclusion	kcl	early	1.09119	0.311553	1.09517	5ssIntronicRegion	Exclusion	shuffle	early
TTGTCA	3.15267	1.38918	1.34429	5ssIntronicRegion	Exclusion	kcl	early	-0.380369	0	1.00587	5ssIntronicRegion	Exclusion	shuffle	early
AGGGTC	3.13609	1.98327	1.50604	5ssIntronicRegion	Exclusion	kcl	early	-0.0028672	0	0.995479	5ssIntronicRegion	Exclusion	shuffle	early
CAAGTG	3.1328	1.52663	1.39365	5ssIntronicRegion	Exclusion	kcl	early	1.23814	0.269512	1.10612	5ssIntronicRegion	Exclusion	shuffle	early
GCTTGG	3.11671	1.64624	1.4051	5ssIntronicRegion	Exclusion	kcl	early	1.46232	0.334763	1.11569	5ssIntronicRegion	Exclusion	shuffle	early
GGTTTC	3.11	1.56889	1.39197	5ssIntronicRegion	Exclusion	kcl	early	-0.637212	0.251564	0.918303	5ssIntronicRegion	Exclusion	shuffle	early
CGTGCT	3.10126	1.31406	1.66436	5ssIntronicRegion	Exclusion	kcl	early	1.63594	0.556505	1.32747	5ssIntronicRegion	Exclusion	shuffle	early
CTCGGC	3.07793	1.36317	1.78874	5ssIntronicRegion	Exclusion	kcl	early	0.445402	0.0481264	1.0673	5ssIntronicRegion	Exclusion	shuffle	early
AGACCA	3.06812	1.43379	1.41866	5ssIntronicRegion	Exclusion	kcl	early	-0.726904	0.165198	0.93395	5ssIntronicRegion	Exclusion	shuffle	early
GTGAGA	3.03571	1.46891	1.36002	5ssIntronicRegion	Exclusion	kcl	early	0.74491	0.0801595	0.967735	5ssIntronicRegion	Exclusion	shuffle	early
TTCCCT	3.02139	1.35215	1.27573	5ssIntronicRegion	Exclusion	kcl	early	0.390306	0.169105	1.05478	5ssIntronicRegion	Exclusion	shuffle	early
GGGGCC	3.01477	1.40785	1.38159	5ssIntronicRegion	Exclusion	kcl	early	0.500581	0.0573436	1.03133	5ssIntronicRegion	Exclusion	shuffle	early
TCTGGG	2.99698	1.36235	1.27965	5ssIntronicRegion	Exclusion	kcl	early	0.879719	0.0437839	1.0202	5ssIntronicRegion	Exclusion	shuffle	early
AGTTGG	2.98006	1.44609	1.42516	5ssIntronicRegion	Exclusion	kcl	early	-2.63967	1.22858	0.731126	5ssIntronicRegion	Exclusion	shuffle	early
TCACCC	2.96518	1.32155	1.38525	5ssIntronicRegion	Exclusion	kcl	early	0.0136541	0.0288498	0.984559	5ssIntronicRegion	Exclusion	shuffle	early
GTGAGC	2.95898	1.57528	1.36747	5ssIntronicRegion	Exclusion	kcl	early	-1.08638	0.480837	0.86942	5ssIntronicRegion	Exclusion	shuffle	early
TGAGTG	2.94671	1.50484	1.28999	5ssIntronicRegion	Exclusion	kcl	early	-1.87966	0.649501	0.863493	5ssIntronicRegion	Exclusion	shuffle	early
GGAGGG	2.9398	1.34212	1.27192	5ssIntronicRegion	Exclusion	kcl	early	1.00377	0.255546	0.928992	5ssIntronicRegion	Exclusion	shuffle	early
GCCAGG	2.92058	1.5685	1.34061	5ssIntronicRegion	Exclusion	kcl	early	0.221583	0.448942	1.13942	5ssIntronicRegion	Exclusion	shuffle	early
CCAGGG	2.7561	1.4221	1.28781	5ssIntronicRegion	Exclusion	kcl	early	0.3982	0.258137	1.07776	5ssIntronicRegion	Exclusion	shuffle	early
GATGCC	2.70985	1.46405	1.47327	5ssIntronicRegion	Exclusion	kcl	early	-0.615353	0.0318872	0.975085	5ssIntronicRegion	Exclusion	shuffle	early
TCCCCA	2.62279	1.34497	1.27938	5ssIntronicRegion	Exclusion	kcl	early	1.28004	0.815548	1.19744	5ssIntronicRegion	Exclusion	shuffle	early
CCCTGT	2.56026	1.37226	1.30552	5ssIntronicRegion	Exclusion	kcl	early	-1.06771	0.35397	0.903319	5ssIntronicRegion	Exclusion	shuffle	early
TCACCT	2.4515	1.34605	1.35271	5ssIntronicRegion	Exclusion	kcl	early	-0.921324	0.118194	0.947686	5ssIntronicRegion	Exclusion	shuffle	early
GCTCTG	2.30973	1.32084	1.25778	5ssIntronicRegion	Exclusion	kcl	early	1.91799	0.44226	1.11617	5ssIntronicRegion	Exclusion	shuffle	early
GGGAGG	1.9746	1.53218	1.28047	5ssIntronicRegion	Exclusion	kcl	early	1.27139	0.0201615	0.992317	5ssIntronicRegion	Exclusion	shuffle	early
AGGGAG	1.36973	1.7175	1.3423	5ssIntronicRegion	Exclusion	kcl	early	3.09523	0.455953	1.12624	5ssIntronicRegion	Exclusion	shuffle	early
CTGGGC	7.85283	3.2572	1.59823	5ssIntronicRegion	Exclusion	kcl	late	1.2145	0.846669	1.22163	5ssIntronicRegion	Exclusion	shuffle	late
TGTGGG	7.71745	5.30117	1.75417	5ssIntronicRegion	Exclusion	kcl	late	-1.53003	0.36864	0.904621	5ssIntronicRegion	Exclusion	shuffle	late
ACGGTC	7.25019	2.6206	5.44056	5ssIntronicRegion	Exclusion	kcl	late	-0.959528	0.189169	0.750608	5ssIntronicRegion	Exclusion	shuffle	late
TGGGCT	6.73607	3.60049	1.67718	5ssIntronicRegion	Exclusion	kcl	late	0.438244	0.486828	1.15888	5ssIntronicRegion	Exclusion	shuffle	late
GGGCAC	6.32853	3.58596	1.98808	5ssIntronicRegion	Exclusion	kcl	late	0.464092	0.292964	1.13464	5ssIntronicRegion	Exclusion	shuffle	late
TGGGAC	6.25727	3.84559	1.8805	5ssIntronicRegion	Exclusion	kcl	late	0.151636	0	1.01065	5ssIntronicRegion	Exclusion	shuffle	late
CCCTTA	6.25169	3.70464	1.88142	5ssIntronicRegion	Exclusion	kcl	late	1.62225	0.659048	1.23646	5ssIntronicRegion	Exclusion	shuffle	late
CTGCCC	6.22423	2.99759	1.54301	5ssIntronicRegion	Exclusion	kcl	late	1.84925	0.437373	1.13195	5ssIntronicRegion	Exclusion	shuffle	late
CCTGGG	6.20759	2.41531	1.42001	5ssIntronicRegion	Exclusion	kcl	late	-2.44528	0.741637	0.847109	5ssIntronicRegion	Exclusion	shuffle	late
CTGTGG	6.17969	3.41697	1.53911	5ssIntronicRegion	Exclusion	kcl	late	0.654302	0.200879	1.06548	5ssIntronicRegion	Exclusion	shuffle	late
TACGAA	6.09188	2.14673	4.75044	5ssIntronicRegion	Exclusion	kcl	late	-0.485779	0	0.886416	5ssIntronicRegion	Exclusion	shuffle	late
AGTGCC	6.07067	3.79344	1.88777	5ssIntronicRegion	Exclusion	kcl	late	-0.747574	0.131933	0.940914	5ssIntronicRegion	Exclusion	shuffle	late
GCTGGG	5.96847	1.70776	1.32467	5ssIntronicRegion	Exclusion	kcl	late	0.954551	0.772138	1.18602	5ssIntronicRegion	Exclusion	shuffle	late
CTCCAC	5.71199	3.1218	1.76362	5ssIntronicRegion	Exclusion	kcl	late	0.054922	0.0603198	1.03833	5ssIntronicRegion	Exclusion	shuffle	late
GGGCTG	5.68039	1.78882	1.36631	5ssIntronicRegion	Exclusion	kcl	late	-2.19575	0.4704	0.884112	5ssIntronicRegion	Exclusion	shuffle	late
CTTCCT	5.47658	2.37207	1.38193	5ssIntronicRegion	Exclusion	kcl	late	2.38806	1.15873	1.2346	5ssIntronicRegion	Exclusion	shuffle	late
TGGCAG	5.47252	3.47278	1.65762	5ssIntronicRegion	Exclusion	kcl	late	0.974644	0.310326	1.10168	5ssIntronicRegion	Exclusion	shuffle	late
CTCCTC	5.44236	1.30504	1.3034	5ssIntronicRegion	Exclusion	kcl	late	2.54642	0.501718	1.14868	5ssIntronicRegion	Exclusion	shuffle	late
GTGGGT	5.42624	3.0969	1.58352	5ssIntronicRegion	Exclusion	kcl	late	-2.80014	1.11236	0.780439	5ssIntronicRegion	Exclusion	shuffle	late
GGGACA	5.41688	2.66091	1.61671	5ssIntronicRegion	Exclusion	kcl	late	-0.086778	0.0560181	1.02693	5ssIntronicRegion	Exclusion	shuffle	late
GGCCCT	5.39583	2.46292	1.60554	5ssIntronicRegion	Exclusion	kcl	late	0.490041	0.160965	1.07889	5ssIntronicRegion	Exclusion	shuffle	late
TGCTGT	5.35388	3.31126	1.5262	5ssIntronicRegion	Exclusion	kcl	late	0.734997	0.294293	1.08888	5ssIntronicRegion	Exclusion	shuffle	late
ATTCCC	5.31881	2.88899	1.87172	5ssIntronicRegion	Exclusion	kcl	late	0.203549	0.108465	1.05586	5ssIntronicRegion	Exclusion	shuffle	late
GTACCG	5.27885	1.95081	3.81739	5ssIntronicRegion	Exclusion	kcl	late	-1.78982	0.625386	0.514408	5ssIntronicRegion	Exclusion	shuffle	late
TGGCCC	5.07773	2.26659	1.59375	5ssIntronicRegion	Exclusion	kcl	late	1.34529	0.163929	1.08008	5ssIntronicRegion	Exclusion	shuffle	late
TGGGTC	5.06389	3.4764	1.82186	5ssIntronicRegion	Exclusion	kcl	late	-0.881598	0.0293192	0.983754	5ssIntronicRegion	Exclusion	shuffle	late
AGAGAG	5.04973	1.93457	1.43679	5ssIntronicRegion	Exclusion	kcl	late	2.41108	0.688596	1.20685	5ssIntronicRegion	Exclusion	shuffle	late
GGCTGG	5.02141	1.76035	1.33902	5ssIntronicRegion	Exclusion	kcl	late	-0.371277	0.270898	1.08267	5ssIntronicRegion	Exclusion	shuffle	late
GTGGAC	4.99731	3.10358	1.90486	5ssIntronicRegion	Exclusion	kcl	late	-1.92643	0.717324	0.770754	5ssIntronicRegion	Exclusion	shuffle	late
CGGCCT	4.93658	2.08102	2.72643	5ssIntronicRegion	Exclusion	kcl	late	0.500047	0.0611648	1.0944	5ssIntronicRegion	Exclusion	shuffle	late
CCAAGG	4.90843	2.65553	1.65666	5ssIntronicRegion	Exclusion	kcl	late	2.53806	1.05201	1.33364	5ssIntronicRegion	Exclusion	shuffle	late
CATTCC	4.8569	2.2876	1.60222	5ssIntronicRegion	Exclusion	kcl	late	0.593087	0.388236	1.15802	5ssIntronicRegion	Exclusion	shuffle	late
GTCCCT	4.84703	1.75821	1.45294	5ssIntronicRegion	Exclusion	kcl	late	-0.497248	0.23312	0.90812	5ssIntronicRegion	Exclusion	shuffle	late
CCCAGT	4.8447	2.47012	1.55151	5ssIntronicRegion	Exclusion	kcl	late	2.71509	0.673714	1.20897	5ssIntronicRegion	Exclusion	shuffle	late
AGTCTA	4.83913	2.53216	1.87609	5ssIntronicRegion	Exclusion	kcl	late	1.45666	0.370391	1.19147	5ssIntronicRegion	Exclusion	shuffle	late
CCAGAG	4.83335	2.50309	1.48703	5ssIntronicRegion	Exclusion	kcl	late	0.628402	0.0482101	1.02273	5ssIntronicRegion	Exclusion	shuffle	late
TAACGT	4.80552	2.00495	2.80857	5ssIntronicRegion	Exclusion	kcl	late	-1.0018	0.275065	0.806298	5ssIntronicRegion	Exclusion	shuffle	late
GGTCGT	4.77729	1.73638	3.55913	5ssIntronicRegion	Exclusion	kcl	late	-0.3738	0	0.930835	5ssIntronicRegion	Exclusion	shuffle	late
AGTGCG	4.77729	1.73638	3.55913	5ssIntronicRegion	Exclusion	kcl	late	-0.959528	0.189169	0.750608	5ssIntronicRegion	Exclusion	shuffle	late
CCCTCA	4.7369	2.50123	1.57998	5ssIntronicRegion	Exclusion	kcl	late	0.208328	0	1.0044	5ssIntronicRegion	Exclusion	shuffle	late
CAAACG	4.72434	1.59454	3.05074	5ssIntronicRegion	Exclusion	kcl	late	-0.0392863	0.0817056	1.14013	5ssIntronicRegion	Exclusion	shuffle	late
GAGCAG	4.70488	2.56714	1.51919	5ssIntronicRegion	Exclusion	kcl	late	-0.0819263	0	1.00215	5ssIntronicRegion	Exclusion	shuffle	late
TACCCC	4.6764	2.49286	1.85354	5ssIntronicRegion	Exclusion	kcl	late	1.33091	0.318308	1.17175	5ssIntronicRegion	Exclusion	shuffle	late
CCCTGT	4.6396	2.32314	1.47484	5ssIntronicRegion	Exclusion	kcl	late	-0.607542	0.332716	0.903237	5ssIntronicRegion	Exclusion	shuffle	late
ACTACC	4.63779	2.13927	1.97532	5ssIntronicRegion	Exclusion	kcl	late	1.18379	0.333247	1.20475	5ssIntronicRegion	Exclusion	shuffle	late
CCTCAC	4.62678	2.42296	1.57118	5ssIntronicRegion	Exclusion	kcl	late	1.52694	0.546438	1.18224	5ssIntronicRegion	Exclusion	shuffle	late
GTCCTG	4.60922	1.88948	1.42199	5ssIntronicRegion	Exclusion	kcl	late	-1.68217	0.238458	0.91668	5ssIntronicRegion	Exclusion	shuffle	late
CTGCCA	4.60488	1.97046	1.44873	5ssIntronicRegion	Exclusion	kcl	late	-0.206926	0	0.998143	5ssIntronicRegion	Exclusion	shuffle	late
CCCTTG	4.57845	2.00351	1.47565	5ssIntronicRegion	Exclusion	kcl	late	-1.65041	0.429058	0.870275	5ssIntronicRegion	Exclusion	shuffle	late
CCAGTG	4.54906	1.56639	1.38161	5ssIntronicRegion	Exclusion	kcl	late	1.0697	0.239346	1.08151	5ssIntronicRegion	Exclusion	shuffle	late
AGAGTG	4.49677	1.68329	1.42446	5ssIntronicRegion	Exclusion	kcl	late	-0.283515	0.0270891	0.980809	5ssIntronicRegion	Exclusion	shuffle	late
TTCCTG	4.46847	2.66753	1.4405	5ssIntronicRegion	Exclusion	kcl	late	-0.959713	0.466419	0.892157	5ssIntronicRegion	Exclusion	shuffle	late
TCTCTG	4.41728	2.03922	1.35582	5ssIntronicRegion	Exclusion	kcl	late	0.337305	0.0205561	0.988818	5ssIntronicRegion	Exclusion	shuffle	late
CTGTCT	4.37332	1.74408	1.31657	5ssIntronicRegion	Exclusion	kcl	late	-1.25649	0.28243	0.923404	5ssIntronicRegion	Exclusion	shuffle	late
TTGGGC	4.36557	1.87802	1.56753	5ssIntronicRegion	Exclusion	kcl	late	-0.727324	0.23316	0.8932	5ssIntronicRegion	Exclusion	shuffle	late
GGACAG	4.32623	2.0286	1.45327	5ssIntronicRegion	Exclusion	kcl	late	0.79507	0.489254	1.15978	5ssIntronicRegion	Exclusion	shuffle	late
CCTAGG	4.30727	2.2552	1.66342	5ssIntronicRegion	Exclusion	kcl	late	1.86499	0.817261	1.30004	5ssIntronicRegion	Exclusion	shuffle	late
GGAGCA	4.2486	1.89916	1.52974	5ssIntronicRegion	Exclusion	kcl	late	-1.20821	0.209046	0.916189	5ssIntronicRegion	Exclusion	shuffle	late
CAACTG	4.22931	1.80519	1.58589	5ssIntronicRegion	Exclusion	kcl	late	-0.510411	0	0.987087	5ssIntronicRegion	Exclusion	shuffle	late
GAGAGA	4.17848	2.22528	1.51971	5ssIntronicRegion	Exclusion	kcl	late	2.18494	1.17143	1.32751	5ssIntronicRegion	Exclusion	shuffle	late
TCCTGT	4.1735	2.18145	1.4107	5ssIntronicRegion	Exclusion	kcl	late	-1.80661	0.382502	0.896633	5ssIntronicRegion	Exclusion	shuffle	late
TCCAGA	4.16942	2.32807	1.52105	5ssIntronicRegion	Exclusion	kcl	late	0.798539	0.333587	1.12053	5ssIntronicRegion	Exclusion	shuffle	late
TCCACC	4.15686	2.18779	1.58404	5ssIntronicRegion	Exclusion	kcl	late	-0.189154	0.131933	0.940914	5ssIntronicRegion	Exclusion	shuffle	late
AGCTTA	4.11045	1.53496	1.50213	5ssIntronicRegion	Exclusion	kcl	late	0.59317	0.106738	1.05539	5ssIntronicRegion	Exclusion	shuffle	late
CCACTG	4.10573	1.83116	1.43109	5ssIntronicRegion	Exclusion	kcl	late	-0.479967	0.0524438	0.977484	5ssIntronicRegion	Exclusion	shuffle	late
CGACAT	4.0962	1.6431	2.54782	5ssIntronicRegion	Exclusion	kcl	late	0.559694	0.157846	1.21062	5ssIntronicRegion	Exclusion	shuffle	late
GCACCA	4.08412	1.95011	1.69774	5ssIntronicRegion	Exclusion	kcl	late	-0.354392	0.0360421	0.976208	5ssIntronicRegion	Exclusion	shuffle	late
TGCCCT	4.07331	2.39285	1.46881	5ssIntronicRegion	Exclusion	kcl	late	0.236081	0.0731069	1.03217	5ssIntronicRegion	Exclusion	shuffle	late
GGTCCA	4.04907	2.31714	1.75696	5ssIntronicRegion	Exclusion	kcl	late	-1.84204	0.696287	0.773293	5ssIntronicRegion	Exclusion	shuffle	late
TCCCGC	4.04009	1.38481	1.86275	5ssIntronicRegion	Exclusion	kcl	late	1.10305	0.252403	1.2295	5ssIntronicRegion	Exclusion	shuffle	late
AGGAGC	4.03762	1.90106	1.49015	5ssIntronicRegion	Exclusion	kcl	late	-2.36236	0.855264	0.785699	5ssIntronicRegion	Exclusion	shuffle	late
GCCCTC	4.03762	1.8861	1.48436	5ssIntronicRegion	Exclusion	kcl	late	2.16223	0.817249	1.24673	5ssIntronicRegion	Exclusion	shuffle	late
TGGGCC	4.02929	1.84306	1.46788	5ssIntronicRegion	Exclusion	kcl	late	1.65066	0.502494	1.17161	5ssIntronicRegion	Exclusion	shuffle	late
CAGAGA	4.02017	1.43155	1.33454	5ssIntronicRegion	Exclusion	kcl	late	0.28941	0	1.00448	5ssIntronicRegion	Exclusion	shuffle	late
CGGTTG	3.99751	1.56039	2.61779	5ssIntronicRegion	Exclusion	kcl	late	-0.90875	0.0843861	0.845338	5ssIntronicRegion	Exclusion	shuffle	late
ACTGCC	3.98678	2.09184	1.54538	5ssIntronicRegion	Exclusion	kcl	late	-1.45815	0.422318	0.866449	5ssIntronicRegion	Exclusion	shuffle	late
AGGGAC	3.97265	1.76294	1.56446	5ssIntronicRegion	Exclusion	kcl	late	-0.367594	0.143037	0.926591	5ssIntronicRegion	Exclusion	shuffle	late
GGCTCC	3.96605	1.72767	1.45888	5ssIntronicRegion	Exclusion	kcl	late	1.57009	0.584038	1.21274	5ssIntronicRegion	Exclusion	shuffle	late
CACTAC	3.95329	1.52001	1.84281	5ssIntronicRegion	Exclusion	kcl	late	0.279711	0.0490677	1.07424	5ssIntronicRegion	Exclusion	shuffle	late
TCCTGG	3.94979	1.34462	1.27686	5ssIntronicRegion	Exclusion	kcl	late	-0.97044	0	0.99572	5ssIntronicRegion	Exclusion	shuffle	late
GTGCCA	3.94048	1.49744	1.45978	5ssIntronicRegion	Exclusion	kcl	late	1.16435	0.350947	1.14802	5ssIntronicRegion	Exclusion	shuffle	late
TGTACA	3.94048	1.82367	1.51913	5ssIntronicRegion	Exclusion	kcl	late	-1.16217	0.0974874	0.951691	5ssIntronicRegion	Exclusion	shuffle	late
GGGTTA	3.87831	1.47618	1.55761	5ssIntronicRegion	Exclusion	kcl	late	1.05208	0.169323	1.10672	5ssIntronicRegion	Exclusion	shuffle	late
GCAACT	3.8521	1.87323	1.73025	5ssIntronicRegion	Exclusion	kcl	late	0.458616	0.0377702	1.03687	5ssIntronicRegion	Exclusion	shuffle	late
TTACGA	3.82711	1.73638	3.55913	5ssIntronicRegion	Exclusion	kcl	late	-1.57302	0.343258	0.61857	5ssIntronicRegion	Exclusion	shuffle	late
CCTGCC	3.81335	1.71813	1.35642	5ssIntronicRegion	Exclusion	kcl	late	1.75178	0.476066	1.14063	5ssIntronicRegion	Exclusion	shuffle	late
GTGTGG	3.77977	1.74309	1.35304	5ssIntronicRegion	Exclusion	kcl	late	0.563746	0.0704525	1.02514	5ssIntronicRegion	Exclusion	shuffle	late
GGGTGG	3.77147	1.87651	1.36995	5ssIntronicRegion	Exclusion	kcl	late	-2.80118	1.05022	0.801205	5ssIntronicRegion	Exclusion	shuffle	late
ACACCC	3.76709	1.72644	1.57393	5ssIntronicRegion	Exclusion	kcl	late	2.51879	1.13758	1.40952	5ssIntronicRegion	Exclusion	shuffle	late
CTACCC	3.76709	2.06104	1.65698	5ssIntronicRegion	Exclusion	kcl	late	1.64567	0.574203	1.23314	5ssIntronicRegion	Exclusion	shuffle	late
TTCCTC	3.74595	1.67427	1.34351	5ssIntronicRegion	Exclusion	kcl	late	2.07696	1.02636	1.23438	5ssIntronicRegion	Exclusion	shuffle	late
CGACCC	3.74154	1.46929	2.41786	5ssIntronicRegion	Exclusion	kcl	late	2.52167	0.892435	1.87978	5ssIntronicRegion	Exclusion	shuffle	late
TGCGAT	3.74154	1.46929	2.41786	5ssIntronicRegion	Exclusion	kcl	late	0.547278	0.151598	1.19736	5ssIntronicRegion	Exclusion	shuffle	late
TCCCTA	3.7394	1.85801	1.55815	5ssIntronicRegion	Exclusion	kcl	late	1.08194	0.183079	1.08852	5ssIntronicRegion	Exclusion	shuffle	late
TTCCCT	3.73669	1.58298	1.30881	5ssIntronicRegion	Exclusion	kcl	late	2.31615	0.827254	1.1963	5ssIntronicRegion	Exclusion	shuffle	late
GCCCTG	3.72916	1.46742	1.32327	5ssIntronicRegion	Exclusion	kcl	late	0.795133	0.18948	1.06805	5ssIntronicRegion	Exclusion	shuffle	late
CCCCTC	3.71845	1.41624	1.34175	5ssIntronicRegion	Exclusion	kcl	late	1.88196	0.535098	1.17086	5ssIntronicRegion	Exclusion	shuffle	late
CGGGGG	3.69129	2.00971	2.18002	5ssIntronicRegion	Exclusion	kcl	late	2.22197	0.798294	1.54579	5ssIntronicRegion	Exclusion	shuffle	late
AGTGAT	3.66351	1.628	1.52337	5ssIntronicRegion	Exclusion	kcl	late	-0.354595	0.18118	0.915764	5ssIntronicRegion	Exclusion	shuffle	late
CGAGCC	3.64265	2.33881	2.76649	5ssIntronicRegion	Exclusion	kcl	late	-0.540176	0	1.03579	5ssIntronicRegion	Exclusion	shuffle	late
GTGAGA	3.6403	1.89916	1.52974	5ssIntronicRegion	Exclusion	kcl	late	-0.692537	0.128495	0.94523	5ssIntronicRegion	Exclusion	shuffle	late
CTTAGC	3.63953	1.68567	1.52628	5ssIntronicRegion	Exclusion	kcl	late	0.711598	0.102018	1.05418	5ssIntronicRegion	Exclusion	shuffle	late
AGGCTT	3.63043	1.57108	1.39817	5ssIntronicRegion	Exclusion	kcl	late	-0.0615165	0.02618	1.01715	5ssIntronicRegion	Exclusion	shuffle	late
CCACCT	3.60657	1.97631	1.46611	5ssIntronicRegion	Exclusion	kcl	late	-3.13267	1.25852	0.748379	5ssIntronicRegion	Exclusion	shuffle	late
GTTCCC	3.58098	1.83855	1.54911	5ssIntronicRegion	Exclusion	kcl	late	-2.21003	1.22995	0.715736	5ssIntronicRegion	Exclusion	shuffle	late
CAGAGC	3.58012	1.56225	1.35386	5ssIntronicRegion	Exclusion	kcl	late	-0.473014	0.131905	0.95136	5ssIntronicRegion	Exclusion	shuffle	late
ACAGAG	3.5697	1.71857	1.36783	5ssIntronicRegion	Exclusion	kcl	late	0.303978	0.15771	1.05882	5ssIntronicRegion	Exclusion	shuffle	late
TAAGAG	3.5407	1.37976	1.40572	5ssIntronicRegion	Exclusion	kcl	late	-1.32482	0.621775	0.82119	5ssIntronicRegion	Exclusion	shuffle	late
CCTCGC	3.52075	1.34013	1.90468	5ssIntronicRegion	Exclusion	kcl	late	-0.123887	0	1.03595	5ssIntronicRegion	Exclusion	shuffle	late
TCAAGA	3.51994	1.70552	1.56298	5ssIntronicRegion	Exclusion	kcl	late	1.2577	0.45023	1.19113	5ssIntronicRegion	Exclusion	shuffle	late
TAGCTC	3.50892	1.57561	1.49738	5ssIntronicRegion	Exclusion	kcl	late	0.843066	0.326482	1.14411	5ssIntronicRegion	Exclusion	shuffle	late
AGATTC	3.48613	2.03564	1.64416	5ssIntronicRegion	Exclusion	kcl	late	0.724635	0.192192	1.09295	5ssIntronicRegion	Exclusion	shuffle	late
AGATTA	3.48146	1.8173	1.62268	5ssIntronicRegion	Exclusion	kcl	late	1.53998	0.528748	1.22235	5ssIntronicRegion	Exclusion	shuffle	late
CCCTGC	3.46156	1.84726	1.40832	5ssIntronicRegion	Exclusion	kcl	late	3.21002	0.621548	1.17883	5ssIntronicRegion	Exclusion	shuffle	late
GGTAGC	3.44105	1.4548	1.6191	5ssIntronicRegion	Exclusion	kcl	late	0.929401	0.232123	1.14042	5ssIntronicRegion	Exclusion	shuffle	late
GGAAGG	3.43488	1.39324	1.33367	5ssIntronicRegion	Exclusion	kcl	late	-0.121888	0.512733	1.15231	5ssIntronicRegion	Exclusion	shuffle	late
TAGGGC	3.41876	1.36142	1.55532	5ssIntronicRegion	Exclusion	kcl	late	-1.33945	0.462612	0.811802	5ssIntronicRegion	Exclusion	shuffle	late
AAGGCT	3.41544	1.49135	1.39938	5ssIntronicRegion	Exclusion	kcl	late	-0.42467	0.0570947	0.966461	5ssIntronicRegion	Exclusion	shuffle	late
GGGTCA	3.41146	1.4198	1.49457	5ssIntronicRegion	Exclusion	kcl	late	-1.5208	0.529	0.80468	5ssIntronicRegion	Exclusion	shuffle	late
TGGGAG	3.39423	1.85255	1.37386	5ssIntronicRegion	Exclusion	kcl	late	-0.0967755	0.188273	0.939776	5ssIntronicRegion	Exclusion	shuffle	late
GCCCTT	3.37638	1.68777	1.44305	5ssIntronicRegion	Exclusion	kcl	late	-0.972096	0.229065	0.911761	5ssIntronicRegion	Exclusion	shuffle	late
ATGCTG	3.37491	1.34917	1.34414	5ssIntronicRegion	Exclusion	kcl	late	-1.03327	0.2513	0.915099	5ssIntronicRegion	Exclusion	shuffle	late
AGCAAG	3.34772	1.39837	1.43465	5ssIntronicRegion	Exclusion	kcl	late	-1.23934	0.394789	0.864624	5ssIntronicRegion	Exclusion	shuffle	late
TGGACA	3.33406	1.54252	1.43864	5ssIntronicRegion	Exclusion	kcl	late	-0.258462	0.165051	0.93319	5ssIntronicRegion	Exclusion	shuffle	late
TGGTCC	3.32667	2.16767	1.57583	5ssIntronicRegion	Exclusion	kcl	late	-0.179453	0.060731	0.970179	5ssIntronicRegion	Exclusion	shuffle	late
AACCCT	3.32667	1.88167	1.5223	5ssIntronicRegion	Exclusion	kcl	late	-0.365126	0.0288106	0.985604	5ssIntronicRegion	Exclusion	shuffle	late
TGGGGA	3.32121	1.55333	1.32847	5ssIntronicRegion	Exclusion	kcl	late	-0.931334	0.386572	0.894268	5ssIntronicRegion	Exclusion	shuffle	late
CCTGTC	3.31063	1.48776	1.32974	5ssIntronicRegion	Exclusion	kcl	late	-0.838557	0.404733	0.891065	5ssIntronicRegion	Exclusion	shuffle	late
GTGCCT	3.30311	2.36009	1.53173	5ssIntronicRegion	Exclusion	kcl	late	0.219881	0	1.00672	5ssIntronicRegion	Exclusion	shuffle	late
TCCCTT	3.29384	1.46083	1.32118	5ssIntronicRegion	Exclusion	kcl	late	-0.224704	0	0.999184	5ssIntronicRegion	Exclusion	shuffle	late
CCCGAG	3.29348	1.36943	1.6475	5ssIntronicRegion	Exclusion	kcl	late	1.36364	0.333247	1.20475	5ssIntronicRegion	Exclusion	shuffle	late
CGTGCC	3.26174	1.34013	1.90468	5ssIntronicRegion	Exclusion	kcl	late	-0.766009	0.18711	0.859516	5ssIntronicRegion	Exclusion	shuffle	late
TGGAAG	3.26088	1.39469	1.34725	5ssIntronicRegion	Exclusion	kcl	late	1.54805	0.685002	1.20556	5ssIntronicRegion	Exclusion	shuffle	late
GGACCC	3.23619	1.4198	1.49457	5ssIntronicRegion	Exclusion	kcl	late	1.43837	0.304891	1.16232	5ssIntronicRegion	Exclusion	shuffle	late
GATGGA	3.22134	1.61003	1.51438	5ssIntronicRegion	Exclusion	kcl	late	-0.781744	0.140809	0.929512	5ssIntronicRegion	Exclusion	shuffle	late
TCCAGG	3.21443	1.42415	1.34455	5ssIntronicRegion	Exclusion	kcl	late	1.17361	0.245024	1.09381	5ssIntronicRegion	Exclusion	shuffle	late
GAGGTG	3.21339	1.32944	1.36648	5ssIntronicRegion	Exclusion	kcl	late	1.11147	0.153951	1.06367	5ssIntronicRegion	Exclusion	shuffle	late
AGAGCA	3.20234	1.51163	1.36219	5ssIntronicRegion	Exclusion	kcl	late	-0.628627	0.0507804	0.972222	5ssIntronicRegion	Exclusion	shuffle	late
CCGCAC	3.19644	1.32174	2.13798	5ssIntronicRegion	Exclusion	kcl	late	-0.24392	0	0.965483	5ssIntronicRegion	Exclusion	shuffle	late
CCCTTC	3.19494	1.71458	1.37861	5ssIntronicRegion	Exclusion	kcl	late	1.88196	0.964255	1.25252	5ssIntronicRegion	Exclusion	shuffle	late
AGGGCA	3.15272	1.32053	1.34746	5ssIntronicRegion	Exclusion	kcl	late	0.896908	0.430202	1.14857	5ssIntronicRegion	Exclusion	shuffle	late
GATTCC	3.13048	1.40611	1.58538	5ssIntronicRegion	Exclusion	kcl	late	-1.89327	0.969417	0.697286	5ssIntronicRegion	Exclusion	shuffle	late
CGCATG	3.10645	1.44319	2.04064	5ssIntronicRegion	Exclusion	kcl	late	0.966853	0.470713	1.41029	5ssIntronicRegion	Exclusion	shuffle	late
CACTGC	3.06642	1.32053	1.34746	5ssIntronicRegion	Exclusion	kcl	late	1.09729	0.521363	1.17207	5ssIntronicRegion	Exclusion	shuffle	late
TATGAC	3.04902	1.40611	1.58538	5ssIntronicRegion	Exclusion	kcl	late	0.458451	0.0389719	1.03675	5ssIntronicRegion	Exclusion	shuffle	late
CAAGAA	3.04314	1.52745	1.47405	5ssIntronicRegion	Exclusion	kcl	late	0.472563	0.138112	1.0699	5ssIntronicRegion	Exclusion	shuffle	late
TGTTGG	3.03655	1.45604	1.37002	5ssIntronicRegion	Exclusion	kcl	late	-1.37727	0.259399	0.908727	5ssIntronicRegion	Exclusion	shuffle	late
CTGGCA	3.01601	1.32944	1.36648	5ssIntronicRegion	Exclusion	kcl	late	-0.00516137	0.0565123	0.967874	5ssIntronicRegion	Exclusion	shuffle	late
AGAACC	3.01131	1.48558	1.47722	5ssIntronicRegion	Exclusion	kcl	late	-1.90916	0.573676	0.801641	5ssIntronicRegion	Exclusion	shuffle	late
GCTCCT	3.00925	1.56639	1.38161	5ssIntronicRegion	Exclusion	kcl	late	-0.324278	0.252598	0.914084	5ssIntronicRegion	Exclusion	shuffle	late
TCCACT	2.98649	1.57561	1.49738	5ssIntronicRegion	Exclusion	kcl	late	0.959452	0.269048	1.12151	5ssIntronicRegion	Exclusion	shuffle	late
ACCCTG	2.90606	1.44937	1.38271	5ssIntronicRegion	Exclusion	kcl	late	0.599338	0.0863211	1.03896	5ssIntronicRegion	Exclusion	shuffle	late
TGAGGG	2.89992	1.30976	1.32942	5ssIntronicRegion	Exclusion	kcl	late	1.27271	0.408011	1.13994	5ssIntronicRegion	Exclusion	shuffle	late
GCCTGG	2.88453	1.57357	1.33461	5ssIntronicRegion	Exclusion	kcl	late	-2.29802	0.693526	0.849058	5ssIntronicRegion	Exclusion	shuffle	late
AGTGAG	2.88062	1.51107	1.37589	5ssIntronicRegion	Exclusion	kcl	late	0.983617	0.594605	1.18647	5ssIntronicRegion	Exclusion	shuffle	late
GCCTAA	2.87296	1.36943	1.6475	5ssIntronicRegion	Exclusion	kcl	late	-0.877214	0.0405633	0.961137	5ssIntronicRegion	Exclusion	shuffle	late
CCCTCT	2.82381	1.55999	1.33048	5ssIntronicRegion	Exclusion	kcl	late	1.68475	0.283735	1.09415	5ssIntronicRegion	Exclusion	shuffle	late
GGGACC	2.77102	1.37073	1.468	5ssIntronicRegion	Exclusion	kcl	late	2.83593	1.08103	1.42373	5ssIntronicRegion	Exclusion	shuffle	late
CTGGGT	2.71696	1.44657	1.33966	5ssIntronicRegion	Exclusion	kcl	late	-2.13264	0.517136	0.861758	5ssIntronicRegion	Exclusion	shuffle	late
CACCCC	2.70809	1.49135	1.39938	5ssIntronicRegion	Exclusion	kcl	late	1.70267	0.229256	1.08951	5ssIntronicRegion	Exclusion	shuffle	late
CTGTTC	2.6954	1.59598	1.39227	5ssIntronicRegion	Exclusion	kcl	late	-2.32506	0.918166	0.789949	5ssIntronicRegion	Exclusion	shuffle	late
GGGAAA	2.59721	1.47805	1.35049	5ssIntronicRegion	Exclusion	kcl	late	1.41621	0.59913	1.17128	5ssIntronicRegion	Exclusion	shuffle	late
TCTGTC	2.57497	1.48776	1.32974	5ssIntronicRegion	Exclusion	kcl	late	-2.39462	1.27656	0.776582	5ssIntronicRegion	Exclusion	shuffle	late
CTCCAG	2.43405	1.49473	1.33197	5ssIntronicRegion	Exclusion	kcl	late	2.31572	0.824406	1.2147	5ssIntronicRegion	Exclusion	shuffle	late
CCTTCC	2.32319	1.65406	1.31927	5ssIntronicRegion	Exclusion	kcl	late	1.77737	0.655003	1.16605	5ssIntronicRegion	Exclusion	shuffle	late
ATCTCT	2.20893	1.3038	1.34095	5ssIntronicRegion	Exclusion	kcl	late	-1.24868	0.558839	0.850045	5ssIntronicRegion	Exclusion	shuffle	late
TACCTT	2.08814	1.44021	1.45485	5ssIntronicRegion	Exclusion	kcl	late	1.06799	0.409351	1.16878	5ssIntronicRegion	Exclusion	shuffle	late
GCCTCC	1.86141	1.50302	1.35918	5ssIntronicRegion	Exclusion	kcl	late	1.79951	0.526934	1.15714	5ssIntronicRegion	Exclusion	shuffle	late
GGAGAG	1.6341	1.33299	1.32495	5ssIntronicRegion	Exclusion	kcl	late	-0.0985741	0.0513754	1.02969	5ssIntronicRegion	Exclusion	shuffle	late
CTCCCT	0.731377	1.63371	1.33174	5ssIntronicRegion	Exclusion	kcl	late	4.25644	0.204287	1.06583	5ssIntronicRegion	Exclusion	shuffle	late
CCCTCC	0.46446	1.54676	1.32648	5ssIntronicRegion	Exclusion	kcl	late	6.21795	1.17794	1.26341	5ssIntronicRegion	Exclusion	shuffle	late
AAGGAA	6.46931	4.74046	4.70243	3ssExonicRegion	Inclusion	kcl	early	-1.44388	0.381652	0.445281	3ssExonicRegion	Inclusion	shuffle	early
CGAATC	5.85475	2.03379	19.0958	3ssExonicRegion	Inclusion	kcl	early	0.0111053	0.341212	2.03745	3ssExonicRegion	Inclusion	shuffle	early
ATTCGA	5.85475	2.03379	19.0958	3ssExonicRegion	Inclusion	kcl	early	0.829352	0.5815	6.1236	3ssExonicRegion	Inclusion	shuffle	early
CACGTC	5.85475	2.03379	19.0958	3ssExonicRegion	Inclusion	kcl	early	-1.44571	0	0	3ssExonicRegion	Inclusion	shuffle	early
TCTATT	5.80761	2.73249	10.7172	3ssExonicRegion	Inclusion	kcl	early	-1.58221	0.214952	0	3ssExonicRegion	Inclusion	shuffle	early
GTACAT	5.62637	2.3797	12.7952	3ssExonicRegion	Inclusion	kcl	early	-0.192917	0.273471	1.52669	3ssExonicRegion	Inclusion	shuffle	early
ATTAAT	5.62637	2.3797	12.7952	3ssExonicRegion	Inclusion	kcl	early	-1.44571	0	0	3ssExonicRegion	Inclusion	shuffle	early
ATGTGG	5.23514	3.01664	4.37083	3ssExonicRegion	Inclusion	kcl	early	1.56628	0.888833	1.91633	3ssExonicRegion	Inclusion	shuffle	early
CACACA	4.66987	1.81756	3.8561	3ssExonicRegion	Inclusion	kcl	early	2.11367	0.795332	2.38285	3ssExonicRegion	Inclusion	shuffle	early
TAATGT	4.63853	2.548	6.45122	3ssExonicRegion	Inclusion	kcl	early	-1.6714	0.427423	0	3ssExonicRegion	Inclusion	shuffle	early
AATTAA	4.61907	1.62445	4	3ssExonicRegion	Inclusion	kcl	early	-1.4962	0	0	3ssExonicRegion	Inclusion	shuffle	early
TTGTGA	4.61907	2.6914	5.66871	3ssExonicRegion	Inclusion	kcl	early	-0.334167	0	1.01601	3ssExonicRegion	Inclusion	shuffle	early
CCAATA	4.36317	2.06088	8.52209	3ssExonicRegion	Inclusion	kcl	early	-1.63947	0	0	3ssExonicRegion	Inclusion	shuffle	early
ACGTCT	4.36317	2.06088	8.52209	3ssExonicRegion	Inclusion	kcl	early	-1.42736	0	0	3ssExonicRegion	Inclusion	shuffle	early
TATCTA	4.36317	2.06088	8.52209	3ssExonicRegion	Inclusion	kcl	early	-0.353707	0.222665	1.22022	3ssExonicRegion	Inclusion	shuffle	early
ACAAAA	4.28485	2.90004	3.80503	3ssExonicRegion	Inclusion	kcl	early	0.120702	0.11642	1.224	3ssExonicRegion	Inclusion	shuffle	early
AATGTC	4.22169	2.49447	5.03408	3ssExonicRegion	Inclusion	kcl	early	-0.694522	0	0.759181	3ssExonicRegion	Inclusion	shuffle	early
TTATTA	4.1411	2.18117	6.41818	3ssExonicRegion	Inclusion	kcl	early	-1.4962	0	0	3ssExonicRegion	Inclusion	shuffle	early
CTAGGC	4.1411	2.43134	8.0303	3ssExonicRegion	Inclusion	kcl	early	-0.226882	0.166546	1.22147	3ssExonicRegion	Inclusion	shuffle	early
CAGCCT	3.90668	2.57614	3.63194	3ssExonicRegion	Inclusion	kcl	early	-1.30377	0.32917	0.529913	3ssExonicRegion	Inclusion	shuffle	early
AGAAGA	3.88467	1.91257	2.29927	3ssExonicRegion	Inclusion	kcl	early	1.06962	0.287207	1.2964	3ssExonicRegion	Inclusion	shuffle	early
CTTCTA	3.87867	2.31686	4.52638	3ssExonicRegion	Inclusion	kcl	early	-0.971328	0	0.551583	3ssExonicRegion	Inclusion	shuffle	early
TTCCCG	3.85732	1.68211	9.53892	3ssExonicRegion	Inclusion	kcl	early	-1.42736	0	0	3ssExonicRegion	Inclusion	shuffle	early
TTCGAA	3.85732	1.68211	9.53892	3ssExonicRegion	Inclusion	kcl	early	0	0	NA	3ssExonicRegion	Inclusion	shuffle	early
AATCTT	3.85732	1.68211	9.53892	3ssExonicRegion	Inclusion	kcl	early	-0.605155	0	0.869984	3ssExonicRegion	Inclusion	shuffle	early
TTAAAG	3.76324	2.34158	3.9924	3ssExonicRegion	Inclusion	kcl	early	-1.11822	0.150977	0.46586	3ssExonicRegion	Inclusion	shuffle	early
TCTTCG	3.7345	2.14011	4.82927	3ssExonicRegion	Inclusion	kcl	early	-0.605155	0	0.869984	3ssExonicRegion	Inclusion	shuffle	early
ATGGTA	3.7345	2.14011	4.82927	3ssExonicRegion	Inclusion	kcl	early	1.4517	0.912918	2.47086	3ssExonicRegion	Inclusion	shuffle	early
ATCTTT	3.61713	1.9686	5.34343	3ssExonicRegion	Inclusion	kcl	early	-0.226882	0.152574	1.1094	3ssExonicRegion	Inclusion	shuffle	early
AAAGGA	3.60455	2.15147	2.54342	3ssExonicRegion	Inclusion	kcl	early	0.896628	0.596288	1.54825	3ssExonicRegion	Inclusion	shuffle	early
ATACAT	3.57879	1.80875	6.38554	3ssExonicRegion	Inclusion	kcl	early	-1.53833	0.220141	0	3ssExonicRegion	Inclusion	shuffle	early
CCACCG	3.57879	1.80875	6.38554	3ssExonicRegion	Inclusion	kcl	early	0.750425	0.58831	2.45424	3ssExonicRegion	Inclusion	shuffle	early
CCCATT	3.57879	1.80875	6.38554	3ssExonicRegion	Inclusion	kcl	early	-0.605155	0	0.869984	3ssExonicRegion	Inclusion	shuffle	early
ACACAA	3.57767	2.15571	4.11099	3ssExonicRegion	Inclusion	kcl	early	-0.525923	0	0.869249	3ssExonicRegion	Inclusion	shuffle	early
AGGATG	3.52748	2.32492	3.2625	3ssExonicRegion	Inclusion	kcl	early	0.798814	0.478232	1.49038	3ssExonicRegion	Inclusion	shuffle	early
GAAGAA	3.44914	1.8602	2.19913	3ssExonicRegion	Inclusion	kcl	early	0.644418	0.165388	1.14021	3ssExonicRegion	Inclusion	shuffle	early
GAAGAG	3.39435	2.03246	2.35484	3ssExonicRegion	Inclusion	kcl	early	0.644418	0.366353	1.34422	3ssExonicRegion	Inclusion	shuffle	early
TGTGAT	3.3877	1.97004	4.28862	3ssExonicRegion	Inclusion	kcl	early	-0.655764	0	0.791502	3ssExonicRegion	Inclusion	shuffle	early
AAATGA	3.35526	2.20995	3.10417	3ssExonicRegion	Inclusion	kcl	early	-1.04829	0.118936	0.575733	3ssExonicRegion	Inclusion	shuffle	early
AAAAAT	3.35526	2.20995	3.10417	3ssExonicRegion	Inclusion	kcl	early	0.936191	0.547959	1.89538	3ssExonicRegion	Inclusion	shuffle	early
CCATTT	3.30999	2.00876	3.76483	3ssExonicRegion	Inclusion	kcl	early	-1.9291	0.827592	0	3ssExonicRegion	Inclusion	shuffle	early
TAGCAG	3.30999	2.00876	3.76483	3ssExonicRegion	Inclusion	kcl	early	-1.71577	0.419947	0	3ssExonicRegion	Inclusion	shuffle	early
GGAAAA	3.14854	1.61817	2.37284	3ssExonicRegion	Inclusion	kcl	early	-1.73277	0.620306	0.249766	3ssExonicRegion	Inclusion	shuffle	early
TCTCCT	3.13675	2.01995	3.07453	3ssExonicRegion	Inclusion	kcl	early	0.422834	0.211366	1.31668	3ssExonicRegion	Inclusion	shuffle	early
TAAAGG	3.0924	1.94335	3.23457	3ssExonicRegion	Inclusion	kcl	early	-0.772048	0	0.713858	3ssExonicRegion	Inclusion	shuffle	early
AAGTCC	3.08747	1.81756	3.8561	3ssExonicRegion	Inclusion	kcl	early	-0.605155	0	0.869984	3ssExonicRegion	Inclusion	shuffle	early
TGCATC	3.08747	1.81756	3.8561	3ssExonicRegion	Inclusion	kcl	early	-1.31181	0.306867	0.377458	3ssExonicRegion	Inclusion	shuffle	early
TATTCT	3.08747	1.81756	3.8561	3ssExonicRegion	Inclusion	kcl	early	-0.525923	0	0.869249	3ssExonicRegion	Inclusion	shuffle	early
GTCACC	3.06929	1.87418	3.47192	3ssExonicRegion	Inclusion	kcl	early	-0.433416	0	0.936984	3ssExonicRegion	Inclusion	shuffle	early
AGTATT	3.06929	1.87418	3.47192	3ssExonicRegion	Inclusion	kcl	early	-0.226882	0.152574	1.1094	3ssExonicRegion	Inclusion	shuffle	early
TCCCGT	3.02223	1.60213	5.10361	3ssExonicRegion	Inclusion	kcl	early	1.85456	1.04614	3.70227	3ssExonicRegion	Inclusion	shuffle	early
TGGTAC	3.02223	1.60213	5.10361	3ssExonicRegion	Inclusion	kcl	early	0.328024	0	0.869984	3ssExonicRegion	Inclusion	shuffle	early
TTGCCC	3.02223	1.60213	5.10361	3ssExonicRegion	Inclusion	kcl	early	-0.971328	0	0.551583	3ssExonicRegion	Inclusion	shuffle	early
TTAAGT	3.02223	1.60213	5.10361	3ssExonicRegion	Inclusion	kcl	early	0.163622	0.193817	1.52966	3ssExonicRegion	Inclusion	shuffle	early
GTTAAT	3.02223	1.60213	5.10361	3ssExonicRegion	Inclusion	kcl	early	0.328024	0.432802	1.7498	3ssExonicRegion	Inclusion	shuffle	early
GGTTAA	3.02223	1.60213	5.10361	3ssExonicRegion	Inclusion	kcl	early	-0.192917	0.273471	1.52669	3ssExonicRegion	Inclusion	shuffle	early
TAGTTT	2.91874	1.42699	6.35329	3ssExonicRegion	Inclusion	kcl	early	-0.192917	0.273471	1.52669	3ssExonicRegion	Inclusion	shuffle	early
TCATAG	2.91874	1.42699	6.35329	3ssExonicRegion	Inclusion	kcl	early	0.519675	0.502956	2.04331	3ssExonicRegion	Inclusion	shuffle	early
ATGTAT	2.91874	1.42699	6.35329	3ssExonicRegion	Inclusion	kcl	early	0.519675	0.502956	2.04331	3ssExonicRegion	Inclusion	shuffle	early
GACAAA	2.90314	1.82894	3.04139	3ssExonicRegion	Inclusion	kcl	early	0.378592	0.339991	1.53267	3ssExonicRegion	Inclusion	shuffle	early
TCAGAA	2.89381	1.9986	2.8288	3ssExonicRegion	Inclusion	kcl	early	0.9838	0.505332	1.60379	3ssExonicRegion	Inclusion	shuffle	early
AAAATT	2.85083	1.75047	3.22086	3ssExonicRegion	Inclusion	kcl	early	0.163622	0.432802	1.7498	3ssExonicRegion	Inclusion	shuffle	early
TCAGCC	2.85083	1.75047	3.22086	3ssExonicRegion	Inclusion	kcl	early	-1.20062	0.334566	0.564098	3ssExonicRegion	Inclusion	shuffle	early
GAATCT	2.85083	1.75047	3.22086	3ssExonicRegion	Inclusion	kcl	early	0.540058	0.291733	1.53571	3ssExonicRegion	Inclusion	shuffle	early
CCAGGA	2.84993	1.87223	2.65712	3ssExonicRegion	Inclusion	kcl	early	0.508562	0.346317	1.36673	3ssExonicRegion	Inclusion	shuffle	early
ACCTTT	2.84992	1.62445	4	3ssExonicRegion	Inclusion	kcl	early	1.52761	0.915925	3.08239	3ssExonicRegion	Inclusion	shuffle	early
TGATCC	2.84992	1.62445	4	3ssExonicRegion	Inclusion	kcl	early	-0.077232	0.135902	1.22273	3ssExonicRegion	Inclusion	shuffle	early
TTCTAA	2.84992	1.62445	4	3ssExonicRegion	Inclusion	kcl	early	0.0111053	0.341212	2.03745	3ssExonicRegion	Inclusion	shuffle	early
GTATCT	2.84992	1.62445	4	3ssExonicRegion	Inclusion	kcl	early	1.2612	0.806485	2.63961	3ssExonicRegion	Inclusion	shuffle	early
TATGCA	2.84992	1.62445	4	3ssExonicRegion	Inclusion	kcl	early	-1.80302	0.629044	0	3ssExonicRegion	Inclusion	shuffle	early
ATTCCT	2.84992	1.62445	4	3ssExonicRegion	Inclusion	kcl	early	0.670922	0.386353	1.84261	3ssExonicRegion	Inclusion	shuffle	early
ACTCTC	2.84992	1.62445	4	3ssExonicRegion	Inclusion	kcl	early	0.163622	0.193817	1.52966	3ssExonicRegion	Inclusion	shuffle	early
AGGAAA	2.82562	1.41609	2.23113	3ssExonicRegion	Inclusion	kcl	early	-0.576886	0	0.837044	3ssExonicRegion	Inclusion	shuffle	early
AGATAC	2.82328	1.67998	3.50222	3ssExonicRegion	Inclusion	kcl	early	-1.04693	0	0.50515	3ssExonicRegion	Inclusion	shuffle	early
AAACTC	2.82328	1.67998	3.50222	3ssExonicRegion	Inclusion	kcl	early	-1.58221	0.214952	0	3ssExonicRegion	Inclusion	shuffle	early
CACTTG	2.82328	1.67998	3.50222	3ssExonicRegion	Inclusion	kcl	early	-0.525923	0	0.869249	3ssExonicRegion	Inclusion	shuffle	early
AACAAA	2.72714	1.72221	2.86968	3ssExonicRegion	Inclusion	kcl	early	-1.22871	0.246858	0.502354	3ssExonicRegion	Inclusion	shuffle	early
AAAATG	2.65942	1.5412	2.64766	3ssExonicRegion	Inclusion	kcl	early	-0.43144	0	0.912784	3ssExonicRegion	Inclusion	shuffle	early
ATGGAA	2.65942	1.5412	2.64766	3ssExonicRegion	Inclusion	kcl	early	0.120702	0.11642	1.224	3ssExonicRegion	Inclusion	shuffle	early
TTCTCA	2.65097	1.63639	3.00327	3ssExonicRegion	Inclusion	kcl	early	0.468792	0.242464	1.39629	3ssExonicRegion	Inclusion	shuffle	early
GTCTCT	2.65097	1.63639	3.00327	3ssExonicRegion	Inclusion	kcl	early	-0.077232	0.129509	1.14524	3ssExonicRegion	Inclusion	shuffle	early
TTGTAA	2.59573	1.42868	4.249	3ssExonicRegion	Inclusion	kcl	early	-0.709295	0	0.760534	3ssExonicRegion	Inclusion	shuffle	early
CTTATT	2.59573	1.42868	4.249	3ssExonicRegion	Inclusion	kcl	early	0.328024	0.432802	1.7498	3ssExonicRegion	Inclusion	shuffle	early
CTAAAC	2.59573	1.42868	4.249	3ssExonicRegion	Inclusion	kcl	early	0.750425	0.58831	2.45424	3ssExonicRegion	Inclusion	shuffle	early
ATTTTA	2.59573	1.42868	4.249	3ssExonicRegion	Inclusion	kcl	early	-0.803765	0	0.675406	3ssExonicRegion	Inclusion	shuffle	early
GTAAAC	2.59573	1.42868	4.249	3ssExonicRegion	Inclusion	kcl	early	-0.109852	0.166546	1.22147	3ssExonicRegion	Inclusion	shuffle	early
TTGACT	2.59573	1.42868	4.249	3ssExonicRegion	Inclusion	kcl	early	-1.58221	0.220141	0	3ssExonicRegion	Inclusion	shuffle	early
GGATGT	2.58771	1.55522	3.20732	3ssExonicRegion	Inclusion	kcl	early	1.4822	0.871445	2.06744	3ssExonicRegion	Inclusion	shuffle	early
TGCACT	2.58771	1.55522	3.20732	3ssExonicRegion	Inclusion	kcl	early	-1.18582	0.149399	0.432183	3ssExonicRegion	Inclusion	shuffle	early
AGCTTT	2.58771	1.55522	3.20732	3ssExonicRegion	Inclusion	kcl	early	-0.263793	0	1.0161	3ssExonicRegion	Inclusion	shuffle	early
TGACTC	2.58771	1.55522	3.20732	3ssExonicRegion	Inclusion	kcl	early	1.4517	0.912918	2.47086	3ssExonicRegion	Inclusion	shuffle	early
TCAGAT	2.56271	1.82894	3.04139	3ssExonicRegion	Inclusion	kcl	early	-1.84572	0.619781	0	3ssExonicRegion	Inclusion	shuffle	early
GAAGTC	2.55371	1.48265	3.55219	3ssExonicRegion	Inclusion	kcl	early	-0.525923	0	0.869249	3ssExonicRegion	Inclusion	shuffle	early
AAATTA	2.55371	1.48265	3.55219	3ssExonicRegion	Inclusion	kcl	early	0.163622	0.432802	1.7498	3ssExonicRegion	Inclusion	shuffle	early
CTTTAA	2.55371	1.48265	3.55219	3ssExonicRegion	Inclusion	kcl	early	0.019236	0.180491	1.35844	3ssExonicRegion	Inclusion	shuffle	early
GTATTC	2.55371	1.48265	3.55219	3ssExonicRegion	Inclusion	kcl	early	1.2612	0.806485	2.63961	3ssExonicRegion	Inclusion	shuffle	early
GATCCA	2.55371	1.48265	3.55219	3ssExonicRegion	Inclusion	kcl	early	-0.971328	0	0.551583	3ssExonicRegion	Inclusion	shuffle	early
CTGTTA	2.55371	1.48265	3.55219	3ssExonicRegion	Inclusion	kcl	early	1.29989	0.731629	2.0613	3ssExonicRegion	Inclusion	shuffle	early
GAAAAG	2.49755	1.57211	2.40046	3ssExonicRegion	Inclusion	kcl	early	0.889513	0.492866	1.54506	3ssExonicRegion	Inclusion	shuffle	early
CTTCCC	2.46687	1.53091	2.81288	3ssExonicRegion	Inclusion	kcl	early	0.0293868	0.113208	1.16463	3ssExonicRegion	Inclusion	shuffle	early
GGAAGA	2.41742	1.63765	2.17622	3ssExonicRegion	Inclusion	kcl	early	-1.2033	0.37622	0.624401	3ssExonicRegion	Inclusion	shuffle	early
ATGTCT	2.37534	1.44157	2.95779	3ssExonicRegion	Inclusion	kcl	early	-1.31181	0.306867	0.377458	3ssExonicRegion	Inclusion	shuffle	early
GGAATT	2.37534	1.44157	2.95779	3ssExonicRegion	Inclusion	kcl	early	0.517564	0.364009	1.67355	3ssExonicRegion	Inclusion	shuffle	early
TTCAGC	2.37534	1.44157	2.95779	3ssExonicRegion	Inclusion	kcl	early	-0.118319	0.0935387	1.05232	3ssExonicRegion	Inclusion	shuffle	early
AAACCA	2.29627	1.53091	2.81288	3ssExonicRegion	Inclusion	kcl	early	-0.916182	0	0.673572	3ssExonicRegion	Inclusion	shuffle	early
CATTGA	2.29627	1.35645	3.19394	3ssExonicRegion	Inclusion	kcl	early	-0.525923	0	0.869249	3ssExonicRegion	Inclusion	shuffle	early
GTTAAG	2.29627	1.35645	3.19394	3ssExonicRegion	Inclusion	kcl	early	-0.709295	0	0.760534	3ssExonicRegion	Inclusion	shuffle	early
TCTACC	2.29627	1.35645	3.19394	3ssExonicRegion	Inclusion	kcl	early	-1.11822	0.150977	0.46586	3ssExonicRegion	Inclusion	shuffle	early
GGACTG	2.29627	1.35645	3.19394	3ssExonicRegion	Inclusion	kcl	early	0.024835	0.135902	1.22273	3ssExonicRegion	Inclusion	shuffle	early
TCTTTC	2.29627	1.35645	3.19394	3ssExonicRegion	Inclusion	kcl	early	-1.96978	0.816536	0	3ssExonicRegion	Inclusion	shuffle	early
AATGTT	2.29627	1.35645	3.19394	3ssExonicRegion	Inclusion	kcl	early	1.26201	0.60173	2.24416	3ssExonicRegion	Inclusion	shuffle	early
CTTGAG	2.29627	1.35645	3.19394	3ssExonicRegion	Inclusion	kcl	early	-0.433416	0	0.936984	3ssExonicRegion	Inclusion	shuffle	early
AATGAA	2.25494	1.49681	2.53011	3ssExonicRegion	Inclusion	kcl	early	0.783259	0.653719	1.81542	3ssExonicRegion	Inclusion	shuffle	early
CAGGAC	2.18211	1.33767	2.7439	3ssExonicRegion	Inclusion	kcl	early	-0.509453	0	0.868506	3ssExonicRegion	Inclusion	shuffle	early
TTAATG	2.18211	1.44157	2.95779	3ssExonicRegion	Inclusion	kcl	early	-0.109852	0.180491	1.35844	3ssExonicRegion	Inclusion	shuffle	early
TTCCAC	2.18211	1.44157	2.95779	3ssExonicRegion	Inclusion	kcl	early	-0.263793	0	1.0161	3ssExonicRegion	Inclusion	shuffle	early
GGTCAG	2.18211	1.33767	2.7439	3ssExonicRegion	Inclusion	kcl	early	-0.22061	0	1.01619	3ssExonicRegion	Inclusion	shuffle	early
GATACA	2.18211	1.44157	2.95779	3ssExonicRegion	Inclusion	kcl	early	-1.04693	0	0.50515	3ssExonicRegion	Inclusion	shuffle	early
AAGAGA	1.98045	1.30227	2.03396	3ssExonicRegion	Inclusion	kcl	early	-1.25284	0.332796	0.546488	3ssExonicRegion	Inclusion	shuffle	early
TCGTGA	6.83081	2.2968	17.7455	3ssExonicRegion	Inclusion	kcl	late	-1.43481	0	0	3ssExonicRegion	Inclusion	shuffle	late
AGCTAC	6.39916	3.85323	6.25528	3ssExonicRegion	Inclusion	kcl	late	-0.78229	0	0.70887	3ssExonicRegion	Inclusion	shuffle	late
CGCTTG	5.96836	2.48362	11.1301	3ssExonicRegion	Inclusion	kcl	late	-1.48463	0	0	3ssExonicRegion	Inclusion	shuffle	late
TAATGT	5.83004	2.91977	7.84677	3ssExonicRegion	Inclusion	kcl	late	0.303534	0.205185	1.7133	3ssExonicRegion	Inclusion	shuffle	late
ACACGG	5.80254	2.69615	8.93578	3ssExonicRegion	Inclusion	kcl	late	0.457003	0.350301	1.6083	3ssExonicRegion	Inclusion	shuffle	late
ATTGAA	5.66073	3.3414	5.66005	3ssExonicRegion	Inclusion	kcl	late	-1.53526	0.484158	0.301893	3ssExonicRegion	Inclusion	shuffle	late
CTGACC	5.65399	3.82621	5.47358	3ssExonicRegion	Inclusion	kcl	late	1.11173	0.363491	1.43377	3ssExonicRegion	Inclusion	shuffle	late
AATGTT	5.65399	3.5835	4.97084	3ssExonicRegion	Inclusion	kcl	late	0.525789	0.249778	1.43188	3ssExonicRegion	Inclusion	shuffle	late
TTAATG	5.00045	2.61397	6.27097	3ssExonicRegion	Inclusion	kcl	late	0.581389	0.495407	2.14378	3ssExonicRegion	Inclusion	shuffle	late
GTAGCA	5.00045	2.61397	6.27097	3ssExonicRegion	Inclusion	kcl	late	-1.00395	0	0.531517	3ssExonicRegion	Inclusion	shuffle	late
ATGTCG	4.74234	1.65525	13.2489	3ssExonicRegion	Inclusion	kcl	late	-0.451619	0	1.06731	3ssExonicRegion	Inclusion	shuffle	late
CCGTAA	4.74234	1.65525	13.2489	3ssExonicRegion	Inclusion	kcl	late	-0.451619	0	1.06731	3ssExonicRegion	Inclusion	shuffle	late
AGGCGC	4.74234	1.65525	13.2489	3ssExonicRegion	Inclusion	kcl	late	-0.890293	0	0.608059	3ssExonicRegion	Inclusion	shuffle	late
AACTAG	4.74234	1.65525	13.2489	3ssExonicRegion	Inclusion	kcl	late	-0.620426	0	0.852991	3ssExonicRegion	Inclusion	shuffle	late
TGTCGC	4.74234	1.65525	13.2489	3ssExonicRegion	Inclusion	kcl	late	-1.43481	0	0	3ssExonicRegion	Inclusion	shuffle	late
CGTCAA	4.74234	1.65525	13.2489	3ssExonicRegion	Inclusion	kcl	late	-1.48463	0	0	3ssExonicRegion	Inclusion	shuffle	late
ACCGTG	4.74234	1.65525	13.2489	3ssExonicRegion	Inclusion	kcl	late	-0.620426	0	0.852991	3ssExonicRegion	Inclusion	shuffle	late
ACTAGT	4.74234	1.65525	13.2489	3ssExonicRegion	Inclusion	kcl	late	-0.242009	0.244396	1.4245	3ssExonicRegion	Inclusion	shuffle	late
GTCGCC	4.74234	1.65525	13.2489	3ssExonicRegion	Inclusion	kcl	late	-1.48463	0	0	3ssExonicRegion	Inclusion	shuffle	late
CGTGAA	4.59673	2.12885	7.41248	3ssExonicRegion	Inclusion	kcl	late	-0.763996	0	0.710114	3ssExonicRegion	Inclusion	shuffle	late
CAGCTA	4.36932	2.35237	5.22043	3ssExonicRegion	Inclusion	kcl	late	0.260249	0.263071	1.31868	3ssExonicRegion	Inclusion	shuffle	late
ATGTGG	4.35607	2.72009	3.82954	3ssExonicRegion	Inclusion	kcl	late	1.93777	0.965456	2.17401	3ssExonicRegion	Inclusion	shuffle	late
ACAAGG	4.09985	2.41976	4.04791	3ssExonicRegion	Inclusion	kcl	late	0.121401	0.118526	1.22325	3ssExonicRegion	Inclusion	shuffle	late
CTCATA	4.06642	2.1016	5.35046	3ssExonicRegion	Inclusion	kcl	late	1.18748	0.589823	2.15368	3ssExonicRegion	Inclusion	shuffle	late
GATGTG	3.80807	2.38301	3.31205	3ssExonicRegion	Inclusion	kcl	late	1.76251	0.929485	2.04405	3ssExonicRegion	Inclusion	shuffle	late
GCCTGT	3.78499	2.17362	3.98354	3ssExonicRegion	Inclusion	kcl	late	-0.349372	0	0.947571	3ssExonicRegion	Inclusion	shuffle	late
GAATGT	3.77677	2.30652	3.46513	3ssExonicRegion	Inclusion	kcl	late	0.259068	0.240662	1.34103	3ssExonicRegion	Inclusion	shuffle	late
GCGCTT	3.74151	1.84748	5.55365	3ssExonicRegion	Inclusion	kcl	late	0.303534	0.205185	1.7133	3ssExonicRegion	Inclusion	shuffle	late
TCTCCA	3.69677	2.30886	2.9481	3ssExonicRegion	Inclusion	kcl	late	-0.576858	0.0798782	0.849782	3ssExonicRegion	Inclusion	shuffle	late
CTCTGA	3.63008	2.17531	3.01572	3ssExonicRegion	Inclusion	kcl	late	1.47386	0.788219	1.77574	3ssExonicRegion	Inclusion	shuffle	late
AAGGAA	3.58485	1.92487	2.43846	3ssExonicRegion	Inclusion	kcl	late	0.932339	0.551623	1.49643	3ssExonicRegion	Inclusion	shuffle	late
TGAATC	3.51666	1.87303	4.45413	3ssExonicRegion	Inclusion	kcl	late	-0.430821	0	0.913485	3ssExonicRegion	Inclusion	shuffle	late
AACTCT	3.51666	1.87303	4.45413	3ssExonicRegion	Inclusion	kcl	late	0.755969	0.497343	1.71948	3ssExonicRegion	Inclusion	shuffle	late
TGTTAA	3.51666	1.87303	4.45413	3ssExonicRegion	Inclusion	kcl	late	-0.890293	0	0.608059	3ssExonicRegion	Inclusion	shuffle	late
TGACCA	3.46623	2.06822	3.36628	3ssExonicRegion	Inclusion	kcl	late	-0.189494	0	1.01656	3ssExonicRegion	Inclusion	shuffle	late
GGATGT	3.46623	2.06822	3.36628	3ssExonicRegion	Inclusion	kcl	late	1.82078	0.951252	2.36284	3ssExonicRegion	Inclusion	shuffle	late
GCAGTT	3.44541	1.92602	3.90726	3ssExonicRegion	Inclusion	kcl	late	-0.983042	0.124815	0.606376	3ssExonicRegion	Inclusion	shuffle	late
AATTGA	3.44541	1.92602	3.90726	3ssExonicRegion	Inclusion	kcl	late	-0.671107	0	0.774093	3ssExonicRegion	Inclusion	shuffle	late
GACGTC	3.39093	1.58836	5.90303	3ssExonicRegion	Inclusion	kcl	late	0.581389	0.495407	2.14378	3ssExonicRegion	Inclusion	shuffle	late
TGCCGT	3.39093	1.58836	5.90303	3ssExonicRegion	Inclusion	kcl	late	-0.109389	0.165894	1.22134	3ssExonicRegion	Inclusion	shuffle	late
GAAGCA	3.26875	1.81383	2.99688	3ssExonicRegion	Inclusion	kcl	late	-1.31736	0.342197	0.527478	3ssExonicRegion	Inclusion	shuffle	late
GGAGCT	3.26875	2.14856	3.21429	3ssExonicRegion	Inclusion	kcl	late	-0.147721	0.0882007	1.06878	3ssExonicRegion	Inclusion	shuffle	late
CCTGAC	3.19746	2.06822	3.36628	3ssExonicRegion	Inclusion	kcl	late	-0.645064	0	0.797683	3ssExonicRegion	Inclusion	shuffle	late
ACCAGA	3.13774	1.96029	2.91632	3ssExonicRegion	Inclusion	kcl	late	0.712343	0.484918	1.50899	3ssExonicRegion	Inclusion	shuffle	late
CCTACA	3.13239	1.61688	4.43836	3ssExonicRegion	Inclusion	kcl	late	-0.925173	0.106049	0.669691	3ssExonicRegion	Inclusion	shuffle	late
GTTAAT	3.13239	1.61688	4.43836	3ssExonicRegion	Inclusion	kcl	late	-0.620426	0	0.852991	3ssExonicRegion	Inclusion	shuffle	late
CTGACT	3.08878	1.7496	3.46953	3ssExonicRegion	Inclusion	kcl	late	-0.983042	0.124815	0.606376	3ssExonicRegion	Inclusion	shuffle	late
TAATGA	3.07484	1.67633	3.81389	3ssExonicRegion	Inclusion	kcl	late	-0.0481358	0.13262	1.16614	3ssExonicRegion	Inclusion	shuffle	late
GTTTTA	3.07484	1.67633	3.81389	3ssExonicRegion	Inclusion	kcl	late	0.581389	0.495407	2.14378	3ssExonicRegion	Inclusion	shuffle	late
GCAACA	3.07484	1.67633	3.81389	3ssExonicRegion	Inclusion	kcl	late	-0.419198	0	0.948021	3ssExonicRegion	Inclusion	shuffle	late
AGGATG	3.04737	1.9006	2.57682	3ssExonicRegion	Inclusion	kcl	late	0.388068	0.240662	1.34103	3ssExonicRegion	Inclusion	shuffle	late
TCATAC	3.01479	1.32128	6.61765	3ssExonicRegion	Inclusion	kcl	late	0.079469	0.1861	1.42632	3ssExonicRegion	Inclusion	shuffle	late
TTCCGA	3.01479	1.32128	6.61765	3ssExonicRegion	Inclusion	kcl	late	-1.73443	0.437491	0	3ssExonicRegion	Inclusion	shuffle	late
TAGTGC	3.01479	1.32128	6.61765	3ssExonicRegion	Inclusion	kcl	late	-0.242009	0.244396	1.4245	3ssExonicRegion	Inclusion	shuffle	late
CTAGTC	3.01479	1.32128	6.61765	3ssExonicRegion	Inclusion	kcl	late	1.50675	0.782224	4.29614	3ssExonicRegion	Inclusion	shuffle	late
CTCGTG	3.01479	1.32128	6.61765	3ssExonicRegion	Inclusion	kcl	late	-1.48463	0	0	3ssExonicRegion	Inclusion	shuffle	late
CCAATA	3.01479	1.32128	6.61765	3ssExonicRegion	Inclusion	kcl	late	-0.242009	0.244396	1.4245	3ssExonicRegion	Inclusion	shuffle	late
GCTACG	3.01479	1.32128	6.61765	3ssExonicRegion	Inclusion	kcl	late	-1.48463	0	0	3ssExonicRegion	Inclusion	shuffle	late
GACCGT	3.01479	1.32128	6.61765	3ssExonicRegion	Inclusion	kcl	late	-0.242009	0.244396	1.4245	3ssExonicRegion	Inclusion	shuffle	late
[truncated: 899 more rows]
