# Supplementary material for: Meta-analysis of activated neurons reveals dynamic regulation of diverse classes of alternative splicing
Source: HighWire-hosted journal article supplement (doi:10.1101/gr.280082.124), 2025-04-24
Supplement: supplemental_table_7_neuronal_rbp_splicing_with_kcl.xlsx [file supplemental_table_7_neuronal_rbp_splicing_with_kcl.xlsx]

## Sheet: Sheet1
Supplemental Table 7. Summary of alternative splicing and expression changes for neuronal RNA-binding proteins previously implicated in KCl-dependent splicing.
RBP	binding motif	high confidence KCl-induced splicing change?	high confidence KCl-induced expression change?	Functional impact?
nSR100 (SRRM4)	UGC repeats	none	none	NA
SRRM3	N.D.	none	none	NA
RNPS1	non-canonical GC 5` splice sites	decreased inclusion of exon at both moderate and long KCl	none	possible loss of function
SRSF11	AGGRR	decreased inclusion of poison exon at both moderate and long KCl	none	possible gain of function
RBFOX2	(U)GCAUG	decreased inclusion of NLS exon at both moderate and long KCl	none	possible relocalization to cytoplasm
PTBP1	UCUU	decreased inclusion of 2 exons with moderate KCl	~2-fold increase after moderate KCl	change in RRM, possible change of binding partners
