# Supplementary material for: Meta-analysis of activated neurons reveals dynamic regulation of diverse classes of alternative splicing
Source: HighWire-hosted journal article supplement (doi:10.1101/gr.280082.124), 2025-04-24
Supplement: supplemental_table_8_dataset_info.xlsx [file supplemental_table_8_dataset_info.xlsx]

## Sheet: Sheet1
		Supplemental Table 8. Information for all RNA sequencing datasets considered for this study.
publication	year	status	reason for removal?	splicing analysis in manuscript?	GEO accession	sample	replicates	treatment length	min # reads (# bases / avg spot length)	max # reads (# bases / avg spot length)	library layout	downloaded?	qc?	analyzed?	notes
Xu, et al. Biology	2022	primary analysis	NA	no	GSE201637	primary cortical neurons	2	0, 2, 6	30800000	34000000	paired	yes	pass	yes
Ibarra, et al. EMBO MSB	2022	primary analysis	NA	yes; alternative exon usage	GSE166959	primary cortical neurons	2	1, 6, 10	13457799	58357216	single	yes	pass	yes
Calderon, et al. eLife	2022	primary analysis	NA	no	GSE172429	primary cortical neurons	3	0, 1, 6	53100000	97800000	paired	yes	pass	yes	high sequence duplication / overrepresented sequences - potentially rRNA contamination?
Quesnel-Vallieres, et al. Mol. Cell	2016	primary analysis	NA	yes; focus on microexons, vast-tools	GSE89984	primary hippocampal neurons	2	0, 0.5, 3	171964672	238493392	paired	yes	pass	yes
Maze, et al. Neuron	2015	primary analysis	NA	no	GSE69807	primary cortical neurons	3	0.5, 2, 5	32489216	81792609	single	yes	pass	yes
Pollina, et al. Nature	2023	secondary analysis	NA	no	GSE175965	primary cortical neurons	3	0, 2, 6	27769389	47429296	single	yes	pass	yes
Osenberg, et al. PNAS	2018	secondary analysis	NA	yes; kainic acid treatment only, Dirchlet-multinomial analysis	GSE113477	primary cortical neurons	3	0, 3	21078065	27207953	paired	yes	pass	yes
Kenny, et al. Mol Cell Neuro	2017	secondary analysis	NA	no	GSE97891	primary cortical neurons	2	0, 4	25078307	85998565	single	yes	pass	yes
Ataman, et al. Nature	2016	secondary analysis	NA	no	GSE78688	primary cortical neurons	3	0, 1, 6	86132866	119348861	single	yes	pass	yes
Flamand and Meyer NAR	2022	not analyzed	fractionated samples	no	GSE171199	primary hippocampal neurons	2	0, 2	44018865	92565042	paired	NA	NA	NA	fractionated into neurite and soma
Tyssowski, et al. Neuron	2018	not analyzed	acute timepoint	no	GSE111899	primary cortical neurons	2	0, 0.33, 1	21600000	50675675	single	NA	NA	NA
Eisen, et al. RNA	2022	not analyzed	low read depth, lack of biological replicates	no	GSE194172	primary cortical neurons	1	0.16, 0.5	9849500	26000000	single	NA	NA	NA	not considered due to low read depth, acute timepoints, and lack of biological replicates
Kim, et al. Cell Rep	2021	not analyzed	lack of biological replicates	no	GSE174583	primary cortical neurons	1	0, 6	39800000	43400000	single	NA	NA	NA	not considered due to lack of biological replicates
Wenderski, et al. PNAS	2020	not analyzed	low read depth	no	GSE147056	primary cortical neurons	3	0, 1, 6	4999108	6800311	paired	NA	NA	NA	not considered due to low read depth
Sharma, et al. Neuron	2019	not analyzed	not bulk RNA-seq	no	GSE121660	primary cortical neurons	4	0, 1, 6	22350303	227524525	single	NA	NA	NA	not considered as this is single-cell seq (inDrops)
Ding, et al. Nat Neuro	2017	not analyzed	acute timepoint	yes; rMATS	GSE93682	primary cortical neurons	2	0, 0.16	22992007	31230194	paired	NA	NA	NA	not considered due to acute timepoint
Iwase, et al. Cell Rep	2016	not analyzed	low library diversity	no	GSE61036	primary cortical neurons	2	0, 1	22613817	70698758	single	yes	fail	no	combined technical replicates for untreated rep2 and kcl rep2; high sequence deuplication / overrepresented sequences
Wang, et al. Nat Neuro	2015	not analyzed	samples not in wildtype background	no	GSE63271	primary cortical neurons	1	0, 6			single	NA	NA	NA	not considered as samples were not in wildtype background (LSD1 HT/KO)
Spiegel, et al. Cell	2014	not analyzed	lack of biological replicates	no	GSE55591	primary cortical neurons (inhibitory)	1	0, 1, 6	64571428	67142857	single	NA	NA	NA	not considered due to lack of biological replicates
Kim, et al. Nature	2010	not analyzed	lack of biological replicates	no	GSE21161	primary cortical neurons	2	0, 1, 6	32050771	350148962	single	NA	NA	NA	not considered as replicates are in different sequencing batches and there are not the same number of replicates per condition
publications found searching NCBI with neuron kcl + mus musculus + expression profiling by high-throughput sequencing
