# Supplementary material for: Meta-analysis of activated neurons reveals dynamic regulation of diverse classes of alternative splicing
Source: HighWire-hosted journal article supplement (doi:10.1101/gr.280082.124), 2025-04-24
Supplement: supplemental_table_9_kcl_exon_pfam_domain_overlap.xlsx [file supplemental_table_9_kcl_exon_pfam_domain_overlap.xlsx]

## Sheet: Moderate KCl exons
Supplemental Table 9. Overlap between frameshifted KCl-dependent exons and annotated Pfam domains mapped to mm39.
exon_chr	exon_start	exon_end	exon_gene_name	exon_strand	pfam_chr	pfam_start	pfam_end	pfam_domain	pfam_strand	bp_overlap
chrX	133708202	133708261	Armcx2	-	.	-1	-1	.	.	0
chr19	42104945	42105004	Pi4k2a	+	chr19	42079336	42108240	PI3_PI4_kinase	+	59
chr19	7351885	7352214	Spindoc	-	chr19	7351940	7352132	zf-C2H2_12	-	192
chr19	7207552	7207647	Naa40	-	.	-1	-1	.	.	0
chr19	3932009	3932119	Chka	+	chr19	3914711	3939985	Choline_kinase	+	110
chr18	76419930	76420019	Smad2	+	chr18	76395682	76421185	MH1	+	89
chr18	32562248	32562355	Bin1	+	.	-1	-1	.	.	0
chr18	31822450	31822554	Sap130	+	chr18	31815181	31855329	SAP130_C	+	104
chr17	57008022	57008087	Ranbp3	+	.	-1	-1	.	.	0
chr17	32073867	32074037	Sik1	-	chr17	32069039	32073945	Pkinase	-	78
chr17	32073867	32074037	Sik1	-	chr17	32069051	32073939	PK_Tyr_Ser-Thr	-	72
chr16	73695799	73696071	Robo2	-	.	-1	-1	.	.	0
chr16	16136308	16136340	Dnm1l	-	.	-1	-1	.	.	0
chr16	16136627	16136704	Dnm1l	-	.	-1	-1	.	.	0
chr15	99617014	99617154	Gpd1	+	chr15	99615500	99618463	NAD_Gly3P_dh_N	+	140
chr19	40329128	40329193	Sorbs1	-	.	-1	-1	.	.	0
chr15	83021668	83021754	Poldip3	-	.	-1	-1	.	.	0
chr15	80767144	80767302	Tnrc6b	+	chr15	80765403	80771201	Ago_hook	+	158
chr14	77906176	77906232	Enox1	+	.	-1	-1	.	.	0
chr14	59801966	59802043	Cdadc1	-	chr14	59734297	59822973	Mo25	+	77
chr14	58087601	58087636	Zdhhc20	-	chr14	58080763	58102978	DHHC	-	35
chr14	57048196	57048315	Zmym5	-	.	-1	-1	.	.	0
chr14	45866310	45866330	Ddhd1	-	.	-1	-1	.	.	0
chr16	32497486	32497530	Tnk2	+	.	-1	-1	.	.	0
chr7	4141694	4141786	Leng8	+	.	-1	-1	.	.	0
chr7	4144021	4144131	Leng8	+	.	-1	-1	.	.	0
chr5	36000511	36000609	Ablim2	+	chr5	35985525	36014507	AbLIM_anchor	+	98
chr3	90166460	90166528	Crtc2	+	chr3	90166527	90167643	TORC_M	+	1
chr12	30049497	30049691	Pxdn	+	.	-1	-1	.	.	0
chr2	64936058	64936171	Cobll1	-	.	-1	-1	.	.	0
chr7	34350171	34350263	Kctd15	-	.	-1	-1	.	.	0
chr3	86700525	86700605	Dclk2	-	chr3	86699415	86722458	Pkinase	-	80
chr3	86700525	86700605	Dclk2	-	chr3	86700543	86722452	PK_Tyr_Ser-Thr	-	62
chr6	18406454	18406549	Cttnbp2	-	.	-1	-1	.	.	0
chr5	138614731	138614820	Zfp68	-	.	-1	-1	.	.	0
chr5	138614731	138614826	Zfp68	-	.	-1	-1	.	.	0
chr5	123272883	123272954	AI480526	-	.	-1	-1	.	.	0
chr5	122309884	122309988	Ppp1cc	+	chr5	122306359	122311211	Metallophos	+	104
chr12	70314007	70314039	Trim9	-	.	-1	-1	.	.	0
chr5	139215507	139215698	Sun1	+	chr5	139209463	139220291	MRP	+	191
chr5	139216527	139216592	Sun1	+	chr5	139209463	139220291	MRP	+	65
chr5	30457707	30457781	Selenoi	+	chr5	30453427	30461152	CDP-OH_P_transf	+	74
chr15	102397210	102397248	Pcbp2	+	.	-1	-1	.	.	0
chr15	102397210	102397248	Pcbp2	+	.	-1	-1	.	.	0
chr11	74555599	74555751	Cluh	+	chr11	74555623	74556772	eIF3_p135	+	128
chr3	54614508	54614561	Supt20	+	chr3	54614367	54615782	Spt20	+	53
chr2	52006679	52006756	Rif1	+	.	-1	-1	.	.	0
chr6	72625783	72625824	Tcf7l1	-	chr6	72610209	72765863	CTNNB1_binding	-	41
chr4	57709450	57710142	Pakap	+	chr4	57568412	57757601	Paralemmin	+	692
chr5	23591861	23592034	5031425E22Rik	-	.	-1	-1	.	.	0
chr1	162503173	162503409	Prrc2c	-	.	-1	-1	.	.	0
chr2	118495263	118495346	Pak6	+	.	-1	-1	.	.	0
chr6	125001467	125001514	Zfp384	+	.	-1	-1	.	.	0
chr5	115801765	115801944	Bicdl1	-	.	-1	-1	.	.	0
chr17	26411489	26411596	Axin1	+	.	-1	-1	.	.	0
chr1	171101835	171101957	B4galt3	+	chr1	171101675	171103527	Glyco_transf_7C	+	122
chr5	144829970	144830116	Smurf1	-	chr5	144829990	144830080	WW	-	90
chr13	41345363	41345440	Elovl2	-	chr13	41338856	41348287	ELO	-	77
chr19	5953758	5953799	Dpf2	-	.	-1	-1	.	.	0
chr1	46857222	46857302	Slc39a10	-	chr1	46849151	46871719	Zip	-	80
chr3	88974461	88974547	Ash1l	+	.	-1	-1	.	.	0
chr1	179359629	179359691	Tfb2m	-	chr1	179356885	179373453	RrnaAD	-	62
chr1	40039047	40039133	Map4k4	+	.	-1	-1	.	.	0
chr1	40039690	40039908	Map4k4	+	.	-1	-1	.	.	0
chr1	40039783	40039908	Map4k4	+	.	-1	-1	.	.	0
chr3	88065340	88065477	Mef2d	+	chr3	88065370	88066494	HJURP_C	+	107
chr3	88065527	88065661	Mef2d	+	chr3	88065370	88066494	HJURP_C	+	134
chr1	13222602	13222679	Ncoa2	-	.	-1	-1	.	.	0
chr3	95655353	95655451	Tars2	-	chr3	95655446	95658023	tRNA_SAD	-	5
chr4	126354159	126354377	Ago1	-	chr4	126353905	126354289	ArgoL1	-	130
chr2	76390529	76390603	Osbpl6	+	.	-1	-1	.	.	0
chr7	126091615	126091779	Atxn2l	-	.	-1	-1	.	.	0
chr2	32137548	32137640	Pomt1	+	chr2	32135657	32140854	MIR	+	92
chr13	46854464	46854556	Nup153	-	chr13	46847576	46867343	Nup153	-	92
chr3	95902833	95902955	Plekho1	-	chr3	95898785	95902941	PH	-	108
chr3	95902833	95902979	Plekho1	-	chr3	95898785	95902941	PH	-	108
chr14	20761112	20761189	Zswim8	+	.	-1	-1	.	.	0
chr1	9956271	9956366	Sgk3	+	chr1	9950578	9959229	PK_Tyr_Ser-Thr	+	95
chr1	9956271	9956366	Sgk3	+	chr1	9950578	9961612	Pkinase	+	95
chr1	84755144	84755209	Trip12	-	.	-1	-1	.	.	0
chr1	84755144	84755227	Trip12	-	.	-1	-1	.	.	0
chr1	36386297	36386374	Kansl3	-	.	-1	-1	.	.	0
chr10	90988946	90989041	Tmpo	-	.	-1	-1	.	.	0
chr8	46194523	46194615	Sorbs2	+	.	-1	-1	.	.	0
chr7	127070876	127071148	Prr14	+	.	-1	-1	.	.	0
chr7	127071077	127071148	Prr14	+	.	-1	-1	.	.	0
chr8	11673696	11673857	Ankrd10	-	chr8	11669287	11678521	Ank	-	161
chr8	11673696	11673857	Ankrd10	-	chr8	11669215	11685545	Ank_2	-	161
chr8	11673696	11673857	Ankrd10	-	chr8	11669218	11682910	Ank_4	-	161
chr8	11673696	11673857	Ankrd10	-	chr8	11669257	11682898	Ank_5	-	161
chr3	87834361	87834423	Rrnad1	-	chr3	87831823	87834902	Methyltransf_32	-	62
chr6	21950036	21950107	Ing3	+	chr6	21949770	21965777	ING	+	71
chr7	122774648	122774680	Tnrc6a	+	chr7	122772502	122776088	Ago_hook	+	32
chr7	122779471	122779617	Tnrc6a	+	.	-1	-1	.	.	0
chr2	179670750	179670866	Lsm14b	+	.	-1	-1	.	.	0
chr16	27255117	27255161	Ccdc50	+	.	-1	-1	.	.	0
chr3	89909124	89909174	Ubap2l	-	.	-1	-1	.	.	0
chr2	130456808	130458661	Ubox5	-	chr2	130456956	130457169	FAST_1	-	213
chr2	130456808	130458661	Ubox5	-	chr2	130446544	130456923	FAST_2	-	115
chr15	88707269	88707364	Creld2	+	.	-1	-1	.	.	0
chr1	97645166	97645285	Ppip5k2	-	.	-1	-1	.	.	0
chr17	35365242	35365328	Bag6	+	.	-1	-1	.	.	0
chr3	90409422	90409559	Chtop	-	chr3	90407229	90410433	FoP_duplication	-	137
chr2	68936086	68936109	Cers6	+	.	-1	-1	.	.	0
chr7	127020576	127020689	Zfp688	-	chr7	127020688	127021104	KRAB	-	1
chr5	112376174	112376221	Miat	-	.	-1	-1	.	.	0
chr4	120382194	120382259	Scmh1	+	.	-1	-1	.	.	0
chr4	155054903	155054995	Pank4	+	chr4	155048710	155056671	Fumble	+	92
chr6	83934490	83934573	Zfp638	+	.	-1	-1	.	.	0
chr4	151109528	151109656	Per3	-	.	-1	-1	.	.	0
chr4	72088944	72089006	Tle1	-	chr4	72076627	72117607	TLE_N	-	62
chr2	24692032	24692118	Ehmt1	-	chr2	24682129	24692085	SET	-	53
chr11	84745080	84745205	Ggnbp2	-	.	-1	-1	.	.	0
chr16	45594525	45594707	Phldb2	-	.	-1	-1	.	.	0
chr7	101818569	101818709	Nup98	-	.	-1	-1	.	.	0
chr13	111584429	111584488	Gpbp1	-	.	-1	-1	.	.	0
chr7	121670924	121670989	Ubfd1	+	.	-1	-1	.	.	0
chr7	122596818	122596919	Rbbp6	+	.	-1	-1	.	.	0
chr7	126388195	126388305	Ppp4c	-	chr7	126385620	126388204	Metallophos	-	9
chr11	40571482	40571595	Mat2b	-	chr11	40570889	40578598	RmlD_sub_bind	-	113
chr19	7255406	7255450	Mark2	-	.	-1	-1	.	.	0
chr8	107627477	107627566	Utp4	+	.	-1	-1	.	.	0
chr8	110403389	110403481	Ist1	-	.	-1	-1	.	.	0
chr1	181008030	181008212	Wdr26	-	.	-1	-1	.	.	0
chr8	123626717	123626887	Ankrd11	-	.	-1	-1	.	.	0
chr7	143961792	143961812	Shank2	+	.	-1	-1	.	.	0
chr11	78921906	78921947	Ksr1	-	.	-1	-1	.	.	0
chr3	94971641	94971784	Pip5k1a	-	.	-1	-1	.	.	0
chr9	71776280	71776351	Tcf12	-	.	-1	-1	.	.	0
chr9	82992840	82992926	Hmgn3	-	chr9	82992458	83028495	HMG14_17	-	86
chr9	86656249	86656332	Snap91	-	.	-1	-1	.	.	0
chr9	108673853	108673981	Ip6k2	+	.	-1	-1	.	.	0
chr9	121581472	121581528	Nktr	+	.	-1	-1	.	.	0
chr10	13879944	13880018	Hivep2	+	.	-1	-1	.	.	0
chr10	18391776	18391907	Nhsl1	+	.	-1	-1	.	.	0
chr17	25491511	25491738	Ube2i	-	.	-1	-1	.	.	0
chr10	108088617	108088784	Ppp1r12a	+	.	-1	-1	.	.	0
chr10	109596347	109596388	Nav3	-	.	-1	-1	.	.	0
chr10	126828467	126828505	Ctdsp2	+	.	-1	-1	.	.	0
chr17	71900092	71900256	Trmt61b	-	.	-1	-1	.	.	0
chr16	90737360	90737383	Synj1	-	.	-1	-1	.	.	0
chr1	105933744	105933815	Zcchc2	+	.	-1	-1	.	.	0
chr11	77916710	77916853	Phf12	+	.	-1	-1	.	.	0
chr11	80280599	80280646	Zfp207	+	.	-1	-1	.	.	0
chr11	108835335	108835430	Axin2	+	.	-1	-1	.	.	0
chr7	34047350	34047406	Lsm14a	-	.	-1	-1	.	.	0
chr12	40844595	40844621	Dock4	+	chr12	40838336	40882317	DHR-2	+	26
chr11	113685748	113685912	Sdk2	-	chr11	113685770	113691083	fn3	-	142
chr13	14344503	14344763	Arid4b	+	chr13	14344636	14355835	Tudor-knot	+	127
chr6	34724820	34724903	Cald1	+	chr6	34718742	34748027	Caldesmon	+	83
chr3	83816458	83816640	Tmem131l	-	chr3	83805650	83868101	TMEM131_like	-	182
chr14	7726974	7727348	Slc4a7	-	chr14	7712370	7731560	Band_3_cyto	-	374
chr14	7726980	7727348	Slc4a7	-	chr14	7712370	7731560	Band_3_cyto	-	368
chr9	113788443	113788550	Ubp1	+	.	-1	-1	.	.	0
chr19	45011980	45012642	Lzts2	+	.	-1	-1	.	.	0
chr18	33338273	33338377	Stard4	-	chr18	33336644	33342158	START	-	104
chr17	56732326	56732925	Ptprs	-	chr17	56732360	56732609	fn3	-	249
chr4	155970548	155970616	Ints11	+	chr4	155970578	155971936	Beta-Casp	+	38
chr5	107122774	107122932	Cdc7	+	.	-1	-1	.	.	0
chr5	38369189	38369431	Zbtb49	-	chr5	38363299	38373897	BTB	-	242
chr5	23700983	23701237	Kmt2e	+	.	-1	-1	.	.	0
chr4	156206389	156206484	9430015G10Rik	+	chr4	156201557	156209968	DUF4501	+	95
chr4	135072506	135072787	Srrm1	-	chr4	135071869	135074144	PWI	-	281
chr12	74332295	74332411	1700086L19Rik	+	.	-1	-1	.	.	0
chr5	134417287	134417376	Gtf2ird1	-	.	-1	-1	.	.	0
chr2	26230416	26230595	Gpsm1	+	.	-1	-1	.	.	0
chr3	108116904	108117032	Atxn7l2	-	.	-1	-1	.	.	0
chr6	125024864	125024902	Ing4	+	.	-1	-1	.	.	0
chr3	95655353	95655451	Tars2	-	chr3	95655446	95658023	tRNA_SAD	-	5
chr15	73459369	73459572	Slc45a4	-	.	-1	-1	.	.	0
chr15	73459393	73459572	Slc45a4	-	.	-1	-1	.	.	0
chr8	13064818	13064892	Mcf2l	+	.	-1	-1	.	.	0
chr1	97644266	97644328	Ppip5k2	-	.	-1	-1	.	.	0
chr12	112878817	112878990	Jag2	-	chr12	112878831	112878921	EGF	-	90
chr12	112878817	112878990	Jag2	-	chr12	112878838	112878906	hEGF	-	68
chr12	112878817	112878990	Jag2	-	chr12	112878937	112879126	EGF	-	53
chr12	112878817	112878990	Jag2	-	chr12	112878949	112879114	hEGF	-	41
chr10	127498599	127498790	Nab2	-	.	-1	-1	.	.	0
chr7	44250292	44250351	Kcnc3	+	.	-1	-1	.	.	0
chr7	79977665	79977778	Unc45a	-	.	-1	-1	.	.	0
chr7	98249878	98250033	Emsy	-	.	-1	-1	.	.	0
chr7	98251789	98251953	Emsy	-	.	-1	-1	.	.	0
chr7	109947093	109947188	Sbf2	-	chr7	109919889	109961362	Myotub-related	-	95
chr11	35767355	35767444	Wwc1	-	.	-1	-1	.	.	0
chr2	158203080	158203115	Snhg17	-	.	-1	-1	.	.	0
chr15	75921305	75921388	Scrib	-	.	-1	-1	.	.	0
chr8	84299656	84299673	Tecr	-	.	-1	-1	.	.	0
chr9	108673853	108673981	Ip6k2	+	.	-1	-1	.	.	0
chr9	41499097	41499456	Mir100hg	+	.	-1	-1	.	.	0
chr17	35124585	35124686	Ehmt2	+	.	-1	-1	.	.	0
chr12	82469434	82469868	Sipa1l1	+	.	-1	-1	.	.	0
chr13	50584203	50584622	Fbxw17	+	.	-1	-1	.	.	0
chr15	82996954	82997118	Serhl	+	chr15	82985918	82998599	Abhydrolase_1	+	164
chr15	82996954	82997118	Serhl	+	chr15	82985924	83000523	Abhydrolase_6	+	164
chr17	56734790	56734816	Ptprs	-	chr17	56733417	56735121	fn3	-	26
chr19	10400148	10400375	Syt7	+	.	-1	-1	.	.	0
chr14	65037793	65037855	Kif13b	+	.	-1	-1	.	.	0
chr13	83773383	83773442	Mef2c	+	chr13	83773413	83781233	HJURP_C	+	29
chr5	115585188	115585244	Msi1	+	.	-1	-1	.	.	0
chr5	102083855	102083938	Wdfy3	-	.	-1	-1	.	.	0
chr7	45032548	45032607	Snrnp70	-	chr7	45030144	45036827	RRM_5	-	59
chr7	45032548	45032607	Snrnp70	-	chr7	45030195	45036832	RRM_1	-	59
chr12	70314007	70314039	Trim9	-	.	-1	-1	.	.	0
chr5	31115231	31115404	Preb	-	.	-1	-1	.	.	0
chr4	155245290	155245412	Ski	-	.	-1	-1	.	.	0
chr1	6807803	6807880	St18	+	.	-1	-1	.	.	0
chr8	104988799	104988912	Cklf	+	.	-1	-1	.	.	0
chr2	26278503	26278571	Entr1	-	.	-1	-1	.	.	0
chr4	126132314	126132424	Map7d1	-	.	-1	-1	.	.	0
chr5	140678548	140678682	Iqce	-	.	-1	-1	.	.	0
chr6	92082262	92082345	Nr2c2	+	.	-1	-1	.	.	0
chr1	127869330	127869350	Rab3gap1	+	chr1	127865773	127870344	Rab3-GAP_cat_C	+	20
chr6	29419100	29419381	Ccdc136	+	.	-1	-1	.	.	0
chr7	15847036	15847113	Napa	+	chr7	15847051	15847087	NSF	+	36
chr7	15847036	15847113	Napa	+	chr7	15832625	15850466	SNAP	+	77
chr2	166794245	166794391	Stau1	-	chr2	166794302	166795235	dsrm	-	89
chr3	88132745	88132876	Gm3764	+	.	-1	-1	.	.	0
chr3	88132748	88132876	Gm3764	+	.	-1	-1	.	.	0
chr5	136340348	136340413	Cux1	-	.	-1	-1	.	.	0
chr1	156448408	156448470	Abl2	+	.	-1	-1	.	.	0
chrX	143138579	143138647	Alg13	+	.	-1	-1	.	.	0
chr17	51102953	51103018	Tbc1d5	-	.	-1	-1	.	.	0
chr1	118469404	118469427	Clasp1	+	.	-1	-1	.	.	0
chr14	103921669	103921818	Slain1	+	chr14	103888342	103941344	SLAIN	+	149
chr9	13248883	13248966	Ccdc82	+	.	-1	-1	.	.	0
chr9	59697318	59697374	Myo9a	+	chr9	59687340	59734489	Myosin_head	+	56
chr5	129636532	129636684	Sfswap	+	.	-1	-1	.	.	0
chr4	91142377	91142415	Elavl2	-	.	-1	-1	.	.	0
chr2	33318112	33318231	Zbtb34	-	.	-1	-1	.	.	0
chr10	81151712	81151789	Pip5k1c	+	.	-1	-1	.	.	0
chr10	81153159	81153236	Pip5k1c	+	.	-1	-1	.	.	0
chr13	103966695	103966838	Erbin	-	.	-1	-1	.	.	0
chr14	7726974	7727348	Slc4a7	-	chr14	7712370	7731560	Band_3_cyto	-	374
chr14	7726980	7727348	Slc4a7	-	chr14	7712370	7731560	Band_3_cyto	-	368
chrX	7506096	7506161	Syp	+	chrX	7506119	7514843	MARVEL	+	42
chr19	3509746	3509763	Ppp6r3	-	.	-1	-1	.	.	0
chr18	65789421	65789702	Zfp532	+	.	-1	-1	.	.	0
chr18	61942002	61942031	Ablim3	-	chr18	61938175	61957009	AbLIM_anchor	-	29
chr18	60678428	60678448	Dctn4	+	chr18	60674681	60685976	Dynactin_p62	+	20
chr18	58151808	58151927	Fbn2	-	chr18	58146836	58151809	EGF_CA	-	1
chr18	58151808	58151927	Fbn2	-	chr18	58151812	58153442	EGF_CA	-	115
chr18	58151808	58151927	Fbn2	-	chr18	58151917	58153502	cEGF	-	10
chr18	24114581	24114664	ENSMUSG00000121479	-	.	-1	-1	.	.	0
chr18	3276693	3276728	Crem	-	.	-1	-1	.	.	0
chr17	80936714	80936776	Map4k3	-	.	-1	-1	.	.	0
chr19	10400148	10400375	Syt7	+	.	-1	-1	.	.	0
chr17	23895492	23895596	Tnfrsf12a	-	chr17	23894967	23896394	stn_TNFRSF12A	-	104
chr17	8394350	8394409	Cep43	+	.	-1	-1	.	.	0
chr16	91639515	91639529	Itsn1	+	chr16	91638423	91645696	SH3_2	+	14
chr16	91639515	91639529	Itsn1	+	chr16	91638429	91645684	SH3_1	+	14
chr16	91639515	91639529	Itsn1	+	chr16	91638432	91645696	SH3_9	+	14
chr16	58549520	58549585	Cldnd1	+	.	-1	-1	.	.	0
chr16	58549535	58549585	Cldnd1	+	.	-1	-1	.	.	0
chr16	35113387	35113416	Adcy5	+	.	-1	-1	.	.	0
chr16	30178486	30178566	Atp13a3	-	chr16	30174657	30178527	Cation_ATPase_N	-	41
chr16	23788655	23788822	Bcl6	-	.	-1	-1	.	.	0
chr16	17094825	17094902	Tmem191c	+	.	-1	-1	.	.	0
chr15	90860673	90860711	Kif21a	-	.	-1	-1	.	.	0
chr15	39767934	39767990	Lrp12	-	.	-1	-1	.	.	0
chr14	121797336	121797371	Dock9	-	chr14	121783395	121820823	DHR-2	-	35
chr14	120640747	120640782	Mbnl2	+	.	-1	-1	.	.	0
chr14	118129753	118129782	Gpc6	+	chr14	117163410	118212462	Glypican	+	29
chr17	56859687	56859995	Tincr	-	.	-1	-1	.	.	0
chrX	156673078	156673167	Cnksr2	-	chrX	156671516	156693186	DUF1170	-	89
chr3	60528843	60528878	Mbnl1	+	.	-1	-1	.	.	0
chr19	46050582	46050728	Pprc1	+	.	-1	-1	.	.	0
chr19	46050840	46050932	Pprc1	+	.	-1	-1	.	.	0
chr19	46050840	46050941	Pprc1	+	.	-1	-1	.	.	0
chr9	110470478	110470558	Nbeal2	-	.	-1	-1	.	.	0
chr2	20888010	20888039	Arhgap21	-	.	-1	-1	.	.	0
chr16	52006711	52006842	Cblb	+	.	-1	-1	.	.	0
chr18	74407715	74407843	Mbd1	+	chr18	74407620	74407838	zf-CXXC	+	123
chr13	83773588	83773725	Mef2c	+	chr13	83773413	83781233	HJURP_C	+	137
chr6	124882218	124882454	Lag3	-	.	-1	-1	.	.	0
chr5	92211195	92211293	G3bp2	-	.	-1	-1	.	.	0
chr14	54883907	54884023	Acin1	-	.	-1	-1	.	.	0
chr5	137658423	137658455	Agfg2	-	.	-1	-1	.	.	0
chr5	135084881	135085237	Bud23	-	chr5	135082235	135085715	WBS_methylT	-	356
chr5	124551247	124551351	Sbno1	-	.	-1	-1	.	.	0
chr5	124551247	124551351	Sbno1	-	.	-1	-1	.	.	0
chr8	15971728	15971904	Csmd1	-	chr8	15971732	15971897	Sushi	-	165
chr8	16048751	16048864	Csmd1	-	chr8	16048755	16049843	Sushi	-	109
chr2	32577156	32577233	Fpgs	-	.	-1	-1	.	.	0
chr5	90430709	90431461	Ankrd17	-	.	-1	-1	.	.	0
chr8	70586875	70586955	Rfxank	-	chr8	70586111	70588030	Ank_2	-	80
chr8	70586875	70586955	Rfxank	-	chr8	70586897	70587727	Ank_5	-	58
chr8	70586875	70586955	Rfxank	-	chr8	70586936	70587325	Ank	-	19
chr8	70586875	70586955	Rfxank	-	chr8	70586939	70587328	Ank_3	-	16
chr5	73257288	73257374	Fryl	-	.	-1	-1	.	.	0
chr5	64420811	64420921	Tbc1d1	+	chr5	64414468	64421725	PID	+	110
chr6	113082877	113083101	Setd5	+	.	-1	-1	.	.	0
chr4	155353489	155353608	Prkcz	-	chr4	155352172	155374204	Pkinase	-	119
chr4	155353489	155353608	Prkcz	-	chr4	155352223	155374204	PK_Tyr_Ser-Thr	-	119
chr9	108888256	108888975	Atrip	-	.	-1	-1	.	.	0
chr4	133422882	133422971	Arid1a	-	.	-1	-1	.	.	0
chr8	110557244	110557252	Ap1g1	+	chr8	110529647	110580267	Adaptin_N	+	8
chr8	110557244	110557252	Ap1g1	+	chr8	110553250	110559842	Cnd1	+	8
chr4	125564345	125564548	Grik3	+	chr4	125553571	125579900	Lig_chan-Glu_bd	+	203
chr4	125564345	125564548	Grik3	+	chr4	125564390	125598830	SBP_bac_3	+	158
chr12	109609847	109609894	Rian	+	.	-1	-1	.	.	0
chr4	129586225	129586308	Tmem39b	-	chr4	129570403	129587065	Tmp39	-	83
chr17	30372276	30372341	Zfand3	+	.	-1	-1	.	.	0
chr4	63900887	63901159	Tnc	-	chr4	63900924	63901149	fn3	-	225
chr4	58820127	58820174	Ecpas	-	.	-1	-1	.	.	0
chr12	70088905	70091025	Nin	-	.	-1	-1	.	.	0
chr18	6057516	6057590	Arhgap12	-	.	-1	-1	.	.	0
chr9	48944876	48944971	Usp28	+	.	-1	-1	.	.	0
chr1	133220089	133220265	Plekha6	+	.	-1	-1	.	.	0
chr1	133220092	133220265	Plekha6	+	.	-1	-1	.	.	0
chr5	134533587	134533691	Clip2	-	.	-1	-1	.	.	0
chr17	46788373	46788438	Ttbk1	-	chr17	46787675	46795078	PK_Tyr_Ser-Thr	-	65
chr17	46788373	46788438	Ttbk1	-	chr17	46787708	46795081	Pkinase	-	65
chr17	46788686	46788790	Ttbk1	-	chr17	46787675	46795078	PK_Tyr_Ser-Thr	-	104
chr17	46788686	46788790	Ttbk1	-	chr17	46787708	46795081	Pkinase	-	104
chr2	49753822	49753917	Lypd6b	+	.	-1	-1	.	.	0
chr8	8673147	8673239	Efnb2	-	chr8	8673154	8710518	Ephrin	-	85
chr11	121112061	121112162	Hexdc	+	.	-1	-1	.	.	0
chr6	140482731	140482748	Plekha5	+	.	-1	-1	.	.	0
chr1	91036301	91036393	Lrrfip1	+	chr1	90996284	91050864	LRRFIP	+	92
chr5	125588909	125589031	Aacs	+	chr5	125561687	125591242	AMP-binding	+	122
chr2	66119217	66119498	Scn1a	-	chr2	66116257	66132768	Ion_trans	-	281
chr1	134239794	134239856	Ppfia4	-	.	-1	-1	.	.	0
chr2	164984035	164984226	Cdh22	-	chr2	164984158	164985750	Cadherin	-	68
chr2	164984035	164984226	Cdh22	-	chr2	164965716	164984056	Cadherin	-	21
chr2	29090885	29090959	Ntng2	-	.	-1	-1	.	.	0
chr5	100536392	100536469	Sec31a	-	.	-1	-1	.	.	0
chr5	100536926	100536964	Sec31a	-	.	-1	-1	.	.	0
chr2	34571646	34571756	Gapvd1	-	chr2	34568060	34571648	VPS9	-	2
chr7	23837717	23837926	Zfp235	+	chr7	23836476	23839726	KRAB	+	209
chr8	61503061	61503192	Nek1	+	.	-1	-1	.	.	0
chr5	97247404	97247538	Paqr3	-	chr5	97243863	97256180	HlyIII	-	134
chr5	97247404	97247601	Paqr3	-	chr5	97243863	97256180	HlyIII	-	197
chr3	95075309	95075410	Sema6c	+	chr3	95074408	95077794	Sema	+	101
chr2	180996801	180996917	Rtel1	+	.	-1	-1	.	.	0
chr12	112778082	112778198	Clba1	+	chr12	112775809	112778199	Clathrin_bdg	+	116
chr11	31868800	31868823	Cpeb4	+	.	-1	-1	.	.	0
chr11	31868800	31868823	Cpeb4	+	.	-1	-1	.	.	0
chr4	11248170	11248310	Ints8	-	.	-1	-1	.	.	0
chr1	183110777	183110845	Mia3	-	.	-1	-1	.	.	0
chr1	40039783	40039908	Map4k4	+	.	-1	-1	.	.	0
chr10	90750554	90750628	Anks1b	+	.	-1	-1	.	.	0
chr10	90750557	90750628	Anks1b	+	.	-1	-1	.	.	0
chr1	58573643	58573810	Fam126b	-	.	-1	-1	.	.	0
chr1	36356284	36356742	Arid5a	+	chr1	36356317	36357584	ARID	+	425
chr2	30238566	30238628	Sh3glb2	-	chr2	30236372	30240727	BAR_2	-	62
chr2	30238566	30238628	Sh3glb2	-	chr2	30236366	30249172	BAR	-	62
chr11	101054838	101055296	Plekhh3	-	chr11	101054862	101055504	FERM_M	-	434
chr1	169786991	169787047	Hsd17b7	-	.	-1	-1	.	.	0
chr1	161666322	161666390	Suco	-	.	-1	-1	.	.	0
chr2	130513979	130514257	Itpa	+	chr2	130509816	130522965	Ham1p_like	+	278
chr2	32134797	32134961	Pomt1	+	.	-1	-1	.	.	0
chr1	87863059	87863172	Dgkd	+	chr1	87859675	87864068	DAGK_acc	+	113
chr1	127722991	127723053	Ccnt2	+	chr1	127701997	127723002	Cyclin_N	+	11
chr4	130471000	130471104	Pum1	+	.	-1	-1	.	.	0
chr4	130471003	130471104	Pum1	+	.	-1	-1	.	.	0
chrX	100634339	100634344	Taf1	+	.	-1	-1	.	.	0
chr3	157862424	157862564	Lrrc7	-	.	-1	-1	.	.	0
chr3	97616797	97616949	Pde4dip	-	.	-1	-1	.	.	0
chr6	29417930	29418151	Ccdc136	+	.	-1	-1	.	.	0
chr6	29419985	29420263	Ccdc136	+	.	-1	-1	.	.	0
chr6	29419985	29420263	Ccdc136	+	.	-1	-1	.	.	0
chr1	192665827	192667218	Syt14	-	.	-1	-1	.	.	0
chr16	30926345	30926449	Acap2	-	.	-1	-1	.	.	0
chr6	21950036	21950107	Ing3	+	chr6	21949770	21965777	ING	+	71
chr2	84433531	84433617	Ctnnd1	-	.	-1	-1	.	.	0
chr3	102947756	102947848	Csde1	+	.	-1	-1	.	.	0
chr8	95588338	95588466	Polr2c	+	chr8	95586882	95589240	RNA_pol_A_bac	+	128
chr8	95588338	95588466	Polr2c	+	chr8	95584240	95590164	RNA_pol_L	+	128
chr2	103556008	103556583	Nat10	-	chr2	103554580	103558366	tRNA_bind_2	-	575
chr8	13063914	13064006	Mcf2l	+	.	-1	-1	.	.	0
chr1	51805980	51806066	Myo1b	-	.	-1	-1	.	.	0
chr2	119120601	119120774	Vps18	+	.	-1	-1	.	.	0
chr3	54287832	54287912	Postn	+	.	-1	-1	.	.	0
chr11	105101370	105101465	Tlk2	+	.	-1	-1	.	.	0
chr7	18821418	18821624	Dmpk	+	chr7	18819960	18822060	Pkinase	+	206
chr7	18821418	18821624	Dmpk	+	chr7	18819963	18821937	PK_Tyr_Ser-Thr	+	206
chr3	35897719	35897844	Atp11b	+	.	-1	-1	.	.	0
chr4	136290748	136290759	Kdm1a	-	chr4	136278242	136299601	Amino_oxidase	-	11
chr4	136290748	136290759	Kdm1a	-	chr4	136286611	136299625	DAO	-	11
chr16	91468835	91468891	Son	+	.	-1	-1	.	.	0
chr3	59155269	59155370	Med12l	+	.	-1	-1	.	.	0
chr3	79415145	79415234	Fnip2	-	.	-1	-1	.	.	0
chr3	122345784	122345798	Fnbp1l	-	.	-1	-1	.	.	0
chr6	83933675	83933743	Zfp638	+	.	-1	-1	.	.	0
chr7	34984140	34984247	Gpatch1	-	.	-1	-1	.	.	0
chr10	76381895	76382044	Lss	+	chr10	76379696	76388863	SQHop_cyclase_C	+	149
chr7	49201344	49201796	Nav2	+	.	-1	-1	.	.	0
chr5	86968491	86968544	Ythdc1	+	.	-1	-1	.	.	0
chr19	4673528	4673590	Rce1	-	chr19	4673223	4674171	Rce1-like	-	62
chr7	79989298	79989459	Unc45a	-	chr7	79988672	79989436	TPR_16	-	138
chr7	79989298	79989459	Unc45a	-	chr7	79989343	79989418	TPR_7	-	75
chr7	79989298	79989459	Unc45a	-	chr7	79989361	79989430	TPR_8	-	69
chr7	98288937	98289089	Emsy	-	.	-1	-1	.	.	0
chr7	99106203	99106217	Gdpd5	+	.	-1	-1	.	.	0
chr7	111933035	111933160	Mical2	+	.	-1	-1	.	.	0
chr7	111936055	111936180	Mical2	+	.	-1	-1	.	.	0
chr7	138624386	138624421	Jakmip3	+	.	-1	-1	.	.	0
chr7	138628482	138628610	Jakmip3	+	chr7	138625057	138633476	JAKMIP_CC3	+	128
chr7	138631340	138631402	Jakmip3	+	chr7	138625057	138633476	JAKMIP_CC3	+	62
chr7	144042933	144042995	Ppfia1	-	.	-1	-1	.	.	0
chr7	100895508	100895579	Fchsd2	+	.	-1	-1	.	.	0
chr8	23262221	23262331	Plat	+	chr8	23262223	23262322	EGF	+	99
chr8	23262221	23262331	Plat	+	chr8	23262238	23262310	hEGF	+	72
chr8	25659212	25659337	Tacc1	-	chr8	25649791	25659257	TACC_C	-	45
chr8	69277703	69277780	Ints10	+	.	-1	-1	.	.	0
chr8	71811259	71811306	Myo9b	+	.	-1	-1	.	.	0
chr8	84044359	84044427	Elmod2	-	chr8	84043022	84048130	ELMO_CED12	-	68
chr8	84950771	84950908	Zswim4	-	.	-1	-1	.	.	0
chr12	4025335	4025466	Efr3b	-	.	-1	-1	.	.	0
chr12	4026714	4026875	Efr3b	-	.	-1	-1	.	.	0
chr8	106203002	106203160	Zdhhc1	-	chr8	106202730	106205418	DHHC	-	158
chr8	123194700	123194807	Rnf166	-	chr8	123194724	123195074	zf-Di19	-	83
chr8	124089757	124089891	Spire2	+	.	-1	-1	.	.	0
chr8	124124721	124124879	Tcf25	+	chr8	124116447	124126048	Tcf25	+	158
chr9	15224069	15224131	Taf1d	+	.	-1	-1	.	.	0
chr19	53232740	53232835	Add3	+	.	-1	-1	.	.	0
chr5	123581938	123582027	Mlxip	+	.	-1	-1	.	.	0
chr11	106041834	106041965	Map3k3	+	chr11	106041121	106045002	Pkinase	+	131
chr11	106041834	106041965	Map3k3	+	chr11	106041124	106044990	PK_Tyr_Ser-Thr	+	131
chr4	152191914	152191964	Plekhg5	+	chr4	152191398	152192895	RhoGEF	+	50
chr10	98855139	98855225	Atp2b1	+	chr10	98854709	98858765	ATP_Ca_trans_C	+	86
chr12	84379708	84379797	Zfp410	+	chr12	84379725	84379794	zf-C2H2	+	69
chr12	84379708	84379797	Zfp410	+	chr12	84379737	84379785	zf-C2HC_2	+	48
chr10	28438102	28438137	Ptprk	+	.	-1	-1	.	.	0
chr10	28440090	28440101	Ptprk	+	.	-1	-1	.	.	0
chr10	28440090	28440101	Ptprk	+	.	-1	-1	.	.	0
chr7	28594856	28594936	Actn4	-	chr7	28593991	28594934	EF-hand_8	-	78
chr7	28594856	28594936	Actn4	-	chr7	28593996	28595545	EF-hand_7	-	80
chr10	79695950	79696027	Ptbp1	+	.	-1	-1	.	.	0
chr10	80251198	80251353	Tcf3	-	.	-1	-1	.	.	0
chr10	80251198	80251356	Tcf3	-	.	-1	-1	.	.	0
chr15	34121568	34121657	Mtdh	+	chr15	34083196	34131428	LYRIC	+	89
chr17	71900092	71900256	Trmt61b	-	.	-1	-1	.	.	0
chr16	90737360	90737380	Synj1	-	.	-1	-1	.	.	0
chr11	54585095	54585397	Rapgef6	+	.	-1	-1	.	.	0
chrX	99855107	99855148	Dlg3	+	.	-1	-1	.	.	0
chr17	12461536	12461691	Map3k4	-	chr17	12458317	12537386	MEKK4_N	-	155
chr11	119434007	119434186	Nptx1	-	chr11	119433337	119435621	Pentaxin	-	179
chr11	119434007	119434186	Nptx1	-	chr11	119433424	119435582	Laminin_G_3	-	179
chr12	51680361	51680501	Strn3	-	.	-1	-1	.	.	0
chr12	65163106	65163237	Fancm	+	.	-1	-1	.	.	0
chr12	69867713	69867715	Map4k5	-	chr12	69853988	69871354	CNH	-	2
chr19	14444543	14444596	Tle4	-	.	-1	-1	.	.	0
chr12	80216956	80217021	Actn1	-	chr12	80215697	80217016	EF-hand_8	-	60
chr12	110827229	110827456	Zfp839	+	chr12	110821508	110835428	DUF4764	+	227
chr9	44313003	44313065	Slc37a4	+	chr9	44309821	44313615	MFS_1	+	62
chr13	12468138	12468284	Lgals8	-	chr13	12468180	12471307	Gal-bind_lectin	-	104
chr13	12468165	12468284	Lgals8	-	chr13	12468180	12471307	Gal-bind_lectin	-	104
chr14	20795859	20795927	Camk2g	-	.	-1	-1	.	.	0
chr14	20797886	20797918	Camk2g	-	.	-1	-1	.	.	0
chr11	106985827	106986015	Bptf	-	.	-1	-1	.	.	0
chr9	48405582	48405686	Rbm7	-	chr9	48405325	48406547	RRM_5	-	104
chr9	48405582	48405686	Rbm7	-	chr9	48405334	48406517	RRM_1	-	104
chr6	29417930	29418151	Ccdc136	+	.	-1	-1	.	.	0
chr11	65880540	65880779	Dnah9	-	chr11	65867335	65880658	AAA_lid_1	-	118
chr11	65880540	65880779	Dnah9	-	chr11	65880747	65896514	AAA_7	-	32
chr2	132226730	132226861	Prokr2	-	.	-1	-1	.	.	0
chr7	30428081	30428140	Tmem147	-	chr7	30427488	30428842	DUF2053	-	59
chr3	106640652	106640921	Lrif1	+	chr3	106592434	106643155	LRIF1	+	269
chrX	151053689	151053826	Kdm5c	+	.	-1	-1	.	.	0
chrX	72840435	72840497	Pdzd4	-	chrX	72839993	72841808	PDZ_6	-	62
chrX	72840435	72840497	Pdzd4	-	chrX	72839999	72841883	PDZ	-	62
chrX	72841799	72841897	Pdzd4	-	chrX	72839993	72841808	PDZ_6	-	9
chrX	72841799	72841897	Pdzd4	-	chrX	72839999	72841883	PDZ	-	84
chrX	70436901	70437050	Mtmr1	+	chrX	70435395	70454443	Myotub-related	+	149
chrX	47717012	47717059	Slc25a14	+	.	-1	-1	.	.	0
chrX	7184622	7184726	Clcn5	-	.	-1	-1	.	.	0
chr19	46574143	46574241	Sfxn2	+	chr19	46570965	46583207	SFXNs	+	98
chr19	27217244	27217369	Vldlr	+	chr19	27217140	27217351	EGF_CA	+	107
chr19	27217244	27217369	Vldlr	+	chr19	27217282	27217333	hEGF	+	51
chr18	80315676	80315729	Slc66a2	+	.	-1	-1	.	.	0
chr18	80251324	80251443	Naa12	+	chr18	80250414	80265544	DIM1	+	119
chr18	80251324	80251443	Naa12	+	chr18	80250453	80265439	Thioredoxin	+	119
chr18	34743462	34743680	Brd8	-	.	-1	-1	.	.	0
chr18	34467345	34467416	Srp19	+	chr18	34464809	34469192	SRP19	+	71
chr18	21157465	21157572	Rnf138	+	chr18	21153960	21157552	zf-Di19	+	87
chr17	26000166	26000351	Ciao3	+	chr17	25996325	26001006	Fe_hyd_lg_C	+	185
chr17	26000166	26000351	Ciao3	+	chr17	25999124	26002842	HAGH_C	-	185
chr17	26000214	26000351	Ciao3	+	chr17	25996325	26001006	Fe_hyd_lg_C	+	137
chr17	26000214	26000351	Ciao3	+	chr17	25999124	26002842	HAGH_C	-	137
chr16	90687417	90687560	Eva1c	+	chr16	90672970	90687560	Gal_Lectin	+	143
chr16	50140662	50140775	Bbx	-	.	-1	-1	.	.	0
chr16	16136627	16136704	Dnm1l	-	.	-1	-1	.	.	0
chr16	12070648	12070695	Shisa9	+	.	-1	-1	.	.	0
chr15	97698575	97698682	Hdac7	-	chr15	97693990	97700638	Hist_deacetyl	-	107
chr15	41712065	41712145	Oxr1	+	.	-1	-1	.	.	0
chr14	105863740	105864039	Gm6145	-	.	-1	-1	.	.	0
chr15	79621673	79621768	Sun2	-	.	-1	-1	.	.	0
chr16	17346798	17346938	Thap7	-	chr16	17346896	17348709	THAP	-	42
chr16	17348093	17348248	Thap7	-	chr16	17346896	17348709	THAP	-	155
chr7	6373957	6374103	Zfp78	+	.	-1	-1	.	.	0
chr4	150523799	150523924	Rere	+	chr4	150491105	150584472	BAH	+	125
chr18	80780026	80780058	Atp9b	-	chr18	80779254	80796344	PhoLip_ATPase_C	-	32
chr8	47644667	47644720	Stox2	-	.	-1	-1	.	.	0
chr7	6721424	6721846	Peg3	-	.	-1	-1	.	.	0
chr5	123237899	123238015	Tmem120b	+	chr5	123214516	123254793	TMPIT	+	116
chr5	123242484	123242573	Tmem120b	+	chr5	123214516	123254793	TMPIT	+	89
chrX	18113213	18113347	Kdm6a	+	.	-1	-1	.	.	0
chrX	18113805	18113960	Kdm6a	+	.	-1	-1	.	.	0
chr8	3650357	3650404	Camsap3	+	.	-1	-1	.	.	0
chr5	23968331	23968348	Pus7	-	.	-1	-1	.	.	0
chr5	8477195	8477266	Slc25a40	+	.	-1	-1	.	.	0
chr4	137362208	137362318	Usp48	+	.	-1	-1	.	.	0
chr7	79968606	79968773	Rccd1	-	chr7	79966784	79968640	RCC1_2	-	34
chr7	79968606	79968773	Rccd1	-	chr7	79968610	79969084	RCC1	-	163
chr4	102719052	102719135	Sgip1	+	.	-1	-1	.	.	0
chr4	102720858	102720929	Sgip1	+	.	-1	-1	.	.	0
chr4	102720861	102720929	Sgip1	+	.	-1	-1	.	.	0
chr4	86732018	86732164	Dennd4c	+	.	-1	-1	.	.	0
chr5	67150485	67150520	Limch1	+	chr5	67131817	67156145	DUF4757	+	35
chr4	63289128	63289247	Akna	-	.	-1	-1	.	.	0
chr12	111792009	111792065	Zfyve21	+	chr12	111790318	111798476	ZFYVE21_C	+	56
chr12	111792009	111792065	Zfyve21	+	chr12	111792057	111794281	ZFYVE21_C	+	8
chr4	21817500	21817643	Usp45	+	chr4	21796880	21834350	UCH	+	143
chr6	39625754	39625789	Braf	-	.	-1	-1	.	.	0
chr10	127129580	127129627	Ddit3	+	.	-1	-1	.	.	0
chr18	14770448	14770540	Ss18	-	.	-1	-1	.	.	0
chr18	14770448	14770540	Ss18	-	.	-1	-1	.	.	0
chr6	140514571	140514606	Plekha5	+	.	-1	-1	.	.	0
chr11	4435878	4435988	Mtmr3	-	.	-1	-1	.	.	0
chr2	156016016	156016087	Rbm39	-	.	-1	-1	.	.	0
chrX	94991003	94991053	Las1l	-	.	-1	-1	.	.	0
chr1	10130048	10130071	Cspp1	+	.	-1	-1	.	.	0
chr2	11728223	11728420	Il15ra	+	.	-1	-1	.	.	0
chr2	91635368	91635454	Ambra1	+	.	-1	-1	.	.	0
chr10	116373125	116373352	Cnot2	-	.	-1	-1	.	.	0
chr18	34394057	34394209	Apc	+	chr18	34394084	34401380	APC_N_CC	+	125
chr5	31302583	31302621	Mpv17	-	chr5	31299145	31303038	Mpv17_PMP22	-	38
chr9	108856812	108856874	Pfkfb4	+	chr9	108839637	108857978	His_Phos_1	+	62
chr18	25153718	25153813	Fhod3	+	.	-1	-1	.	.	0
chr1	74662995	74663093	Stk36	+	.	-1	-1	.	.	0
chr5	134653294	134653353	Eif4h	-	.	-1	-1	.	.	0
chr11	31858824	31858874	Cpeb4	+	.	-1	-1	.	.	0
chr3	88066842	88066898	Mef2d	+	.	-1	-1	.	.	0
chr4	12059787	12059894	Tmem67	-	chr4	12039814	12077340	Meckelin	-	107
chr8	110810975	110811082	Zfp612	+	chr8	110810291	110810977	KRAB	+	2
chr5	66549615	66549677	Apbb2	-	.	-1	-1	.	.	0
chr1	91474649	91474951	Asb1	+	chr1	91471948	91479800	Ank_2	+	302
chr1	91474649	91474951	Asb1	+	chr1	91474692	91474782	Ank	+	90
chr1	91474649	91474951	Asb1	+	chr1	91474695	91474851	Ank_4	+	156
chr1	91474649	91474951	Asb1	+	chr1	91474788	91474872	Ank	+	84
chr1	74618483	74618776	Zfp142	-	.	-1	-1	.	.	0
chr1	74618483	74619085	Zfp142	-	.	-1	-1	.	.	0
chr11	32630200	32630301	Fbxw11	+	.	-1	-1	.	.	0
chr16	5016439	5016486	Nagpa	-	.	-1	-1	.	.	0
chr10	128535844	128535987	Cdk2	-	chr10	128535013	128540687	Pkinase	-	143
chr10	128535844	128535987	Cdk2	-	chr10	128535535	128540681	PK_Tyr_Ser-Thr	-	143
chr1	174894182	174894259	Rgs7	-	.	-1	-1	.	.	0
chr1	174903582	174903662	Rgs7	-	.	-1	-1	.	.	0
chr1	84773410	84773535	Trip12	-	.	-1	-1	.	.	0
chr3	157880739	157880987	Lrrc7	-	.	-1	-1	.	.	0
chr2	59907213	59907254	Baz2b	-	.	-1	-1	.	.	0
chr3	97616797	97616949	Pde4dip	-	.	-1	-1	.	.	0
chr6	29411708	29411866	Ccdc136	+	.	-1	-1	.	.	0
chr6	29412362	29412532	Ccdc136	+	.	-1	-1	.	.	0
chr1	97967963	97968037	B230216N24Rik	-	.	-1	-1	.	.	0
chr10	90988489	90988599	Tmpo	-	.	-1	-1	.	.	0
chr8	46223582	46223626	Sorbs2	+	chr8	46216168	46223590	Sorb	+	8
chr2	131362974	131363090	Smox	+	chr2	131362643	131366764	Amino_oxidase	+	116
chr1	132932391	132932429	Mdm4	-	.	-1	-1	.	.	0
chr9	21499146	21499214	Carm1	+	.	-1	-1	.	.	0
chr16	57001854	57001898	Tbc1d23	-	chr16	56990793	57004805	TBC1D23_C	-	44
chr1	51807808	51807894	Myo1b	-	.	-1	-1	.	.	0
chr2	119843781	119843798	Mapkbp1	+	.	-1	-1	.	.	0
chr5	9176539	9176748	Dmtf1	-	chr5	9151317	9202972	DUF2678	+	209
chr2	62095385	62095522	Slc4a10	+	chr2	62094395	62134252	HCO3_cotransp	+	137
chr2	156590251	156590322	Dlgap4	+	chr2	156588086	156604820	GKAP	+	71
chr1	185082033	185082077	Bpnt1	+	chr1	185070345	185088802	Inositol_P	+	44
chr4	129077393	129077509	S100pbp	-	.	-1	-1	.	.	0
chr1	74499073	74499138	Usp37	-	chr1	74479126	74514149	UCH	-	65
chr1	74499073	74499138	Usp37	-	chr1	74479189	74510493	UCH_1	-	65
chr12	77008036	77008062	Max	-	.	-1	-1	.	.	0
chr2	181153366	181153407	Tpd52l2	+	chr2	181141738	181154859	TPD52	+	41
chr2	124502624	124502680	Sema6d	+	.	-1	-1	.	.	0
chr3	30666617	30666700	Mynn	+	chr3	30666628	30666697	zf-met	+	69
chr3	30666617	30666700	Mynn	+	chr3	30666628	30666697	zf-C2H2_6	+	69
chr3	30666617	30666700	Mynn	+	chr3	30666628	30666697	zf-C2H2_4	+	69
chr3	30666617	30666700	Mynn	+	chr3	30666628	30666697	zf-C2H2	+	69
chr3	34119122	34119202	Fxr1	+	chr3	34116155	34119124	FXR_C1	+	2
chr6	54563980	54564069	Fkbp14	-	chr6	54562868	54569911	FKBP_C	-	89
chr6	54563980	54564069	Fkbp14	-	chr6	54562868	54569911	FKBP_C	-	89
chr2	24546722	24546733	Cacna1b	-	chr2	24540471	24548972	Ion_trans	-	11
chr4	144645954	144646073	Dhrs3	+	chr4	144620201	144646638	adh_short	+	119
chr4	144645954	144646073	Dhrs3	+	chr4	144620204	144646551	KR	+	119
chr4	144645954	144646073	Dhrs3	+	chr4	144620225	144650563	adh_short_C2	+	119
chr4	53050934	53051008	Abca1	-	chr4	53042695	53068698	ABC2_membrane_3	-	74
chr3	148533176	148533220	Adgrl2	-	chr3	148532030	148542173	7tm_2	-	44
chr3	105574277	105574333	Kcnd3	+	chr3	105572805	105575563	DUF3399	+	56
chr1	160863664	160863813	Gas5	+	.	-1	-1	.	.	0
chr1	160863787	160863813	Gas5	+	.	-1	-1	.	.	0
chr18	74004988	74005134	Mro	+	.	-1	-1	.	.	0
chr2	32310667	32310702	Slc25a25	-	chr2	32310388	32311532	EF-hand_7	-	35
chr7	127139422	127139604	Srcap	+	.	-1	-1	.	.	0
chr9	113689187	113689204	Clasp2	+	.	-1	-1	.	.	0
chr12	3526025	3526168	Asxl2	+	chr12	3524612	3543837	ASXH	+	143
chrX	134644190	134644270	Gprasp1	+	.	-1	-1	.	.	0
chr9	45583923	45584219	Dscaml1	+	chr9	45583931	45584177	Ig_3	+	246
chr9	45583923	45584219	Dscaml1	+	chr9	45583931	45584189	Ig_2	+	258
chr9	45583923	45584219	Dscaml1	+	chr9	45583931	45584216	I-set	+	285
chr9	45583923	45584219	Dscaml1	+	chr9	45583961	45584198	ig	+	237
chr7	66358386	66358475	Lins1	+	.	-1	-1	.	.	0
chrX	73284421	73284477	Flna	-	.	-1	-1	.	.	0
chr2	142549178	142549330	Kif16b	-	.	-1	-1	.	.	0
chr7	107327922	107327954	Ppfibp2	+	.	-1	-1	.	.	0
chr7	109141526	109141741	Denn2b	-	.	-1	-1	.	.	0
chr9	34936406	34936441	Kirrel3	+	.	-1	-1	.	.	0
chr7	122586838	122586951	Rbbp6	+	.	-1	-1	.	.	0
chr4	144830183	144830257	Vps13d	-	.	-1	-1	.	.	0
chr7	140522316	140522477	Pgghg	+	.	-1	-1	.	.	0
chr13	91946941	91947009	Zcchc9	-	chr13	91946957	91947005	zf-CCHC_4	-	48
chr19	4944288	4944446	Bbs1	-	.	-1	-1	.	.	0
chr2	53018728	53018853	Fmnl2	+	.	-1	-1	.	.	0
chr18	36757561	36758319	Ankhd1	+	.	-1	-1	.	.	0
chr8	61987891	61987941	Palld	-	.	-1	-1	.	.	0
chr8	72719637	72719759	Zfp961	+	chr8	72719640	72719945	KRAB	+	119
chr2	30286443	30286541	Dolpp1	+	chr2	30285991	30287480	PAP2	+	98
chr2	30287030	30287158	Dolpp1	+	chr2	30285991	30287480	PAP2	+	128
chr19	7259162	7259323	Mark2	-	.	-1	-1	.	.	0
chr8	124172836	124172922	Def8	+	.	-1	-1	.	.	0
chr7	143951977	143951997	Shank2	+	.	-1	-1	.	.	0
chr9	18380574	18380843	Zfp558	-	.	-1	-1	.	.	0
chr14	67971589	67971738	Kctd9	+	chr14	67971595	67971691	Pentapeptide	+	96
chr14	67971589	67971738	Kctd9	+	chr14	67971697	67975132	Pentapeptide	+	41
chr9	20386206	20386328	Zfp426	-	chr9	20384402	20386326	KRAB	-	120
chr9	20386206	20386328	Zfp426	-	chr9	20384402	20386326	KRAB	-	120
chr9	31258088	31258435	Prdm10	+	chr9	31258226	31258286	zf-met	+	60
chr9	31258088	31258435	Prdm10	+	chr9	31258226	31258292	zf-C2H2	+	66
chr9	31258088	31258435	Prdm10	+	chr9	31258229	31258298	zf-C2H2_6	+	69
chr13	55756154	55756237	B4galt7	+	chr13	55755139	55756558	Glyco_transf_7C	+	83
chr13	102942658	102942666	Mast4	-	chr13	102919918	102947070	DUF1908	-	8
chr11	106041834	106041965	Map3k3	+	chr11	106041121	106045002	Pkinase	+	131
chr11	106041834	106041965	Map3k3	+	chr11	106041124	106044990	PK_Tyr_Ser-Thr	+	131
chr9	69911587	69911622	Bnip2	+	chr9	69908147	69914352	CRAL_TRIO_2	+	35
chr5	121944284	121944337	Atxn2	+	.	-1	-1	.	.	0
chr9	80006167	80006187	Senp6	+	.	-1	-1	.	.	0
chr9	86388923	86388952	Dop1a	+	.	-1	-1	.	.	0
chr17	48706009	48706092	Nfya	-	.	-1	-1	.	.	0
chr17	48706009	48706095	Nfya	-	.	-1	-1	.	.	0
chr17	48706012	48706092	Nfya	-	.	-1	-1	.	.	0
chr9	111022114	111022185	Lrrfip2	+	chr9	110990370	111051293	LRRFIP	+	71
chr10	63172758	63172874	Sirt1	-	.	-1	-1	.	.	0
chr18	42447035	42447199	Rbm27	+	.	-1	-1	.	.	0
chr12	21306475	21306609	Asap2	+	.	-1	-1	.	.	0
chr5	100183493	100183597	Hnrnpdl	-	.	-1	-1	.	.	0
chr11	54227761	54227838	Acsl6	+	chr11	54214847	54241431	AMP-binding	+	77
chr11	54227896	54227973	Acsl6	+	chr11	54214847	54241431	AMP-binding	+	77
chr11	54542574	54542588	Rapgef6	+	.	-1	-1	.	.	0
chr11	73077114	73077284	Ctns	-	chr11	73075875	73077168	PQ-loop	-	54
chr11	80283909	80284001	Zfp207	+	.	-1	-1	.	.	0
chr5	8145072	8145179	Adam22	-	.	-1	-1	.	.	0
chr16	97630810	97630911	Prdm15	-	.	-1	-1	.	.	0
chr11	115710950	115711048	Tsen54	+	.	-1	-1	.	.	0
chr2	30025420	30025563	Tbc1d13	+	.	-1	-1	.	.	0
chr6	48385462	48385659	Krba1	+	chr6	48384755	48386219	KRBA1	+	197
chrX	133619474	133619566	Armcx1	+	.	-1	-1	.	.	0
chr12	51689886	51689996	Strn3	-	.	-1	-1	.	.	0
chr5	146229433	146229576	Cdk8	+	chr5	146168574	146229510	PK_Tyr_Ser-Thr	+	77
chr5	146229433	146229576	Cdk8	+	chr5	146168577	146235684	Pkinase	+	143
chr5	146229448	146229576	Cdk8	+	chr5	146168574	146229510	PK_Tyr_Ser-Thr	+	62
chr5	146229448	146229576	Cdk8	+	chr5	146168577	146235684	Pkinase	+	128
chr12	76146801	76146869	Syne2	+	.	-1	-1	.	.	0
chr8	95553262	95553330	Ciapin1	-	.	-1	-1	.	.	0
chr13	14233508	14233795	Ggps1	-	.	-1	-1	.	.	0
chr13	14344503	14344655	Arid4b	+	chr13	14344636	14355835	Tudor-knot	+	19
chr13	67869565	67869663	Zfp65	-	.	-1	-1	.	.	0
chr13	96753501	96753578	Cert1	+	.	-1	-1	.	.	0
chr13	106994006	106994032	Ipo11	-	.	-1	-1	.	.	0
chr2	143792347	143792442	Rrbp1	-	.	-1	-1	.	.	0
chr11	106935317	106935490	Bptf	-	chr11	106934539	106937860	PHD	-	173
chr11	106977537	106977722	Bptf	-	.	-1	-1	.	.	0
chr14	29770927	29771076	Cacna1d	-	chr14	29767204	29774514	CAC1F_C	-	149
chr19	3921002	3921061	Chka	+	chr19	3914711	3939985	Choline_kinase	+	59
chr18	3276693	3276728	Crem	-	.	-1	-1	.	.	0
chr14	52439600	52439779	Chd8	-	chr14	52439609	52439741	BRK	-	132
chr6	85628244	85628399	Alms1	+	.	-1	-1	.	.	0
chr5	122181832	122181906	Cux2	-	.	-1	-1	.	.	0
chr12	109596454	109596624	Rian	+	.	-1	-1	.	.	0
chr8	104988105	104988200	Cklf	+	.	-1	-1	.	.	0
chr4	152068091	152068192	Thap3	-	.	-1	-1	.	.	0
chr6	49229736	49230041	Tra2a	-	.	-1	-1	.	.	0
chr3	65862550	65862696	Ccnl1	-	chr3	65858875	65865291	Cyclin_N	-	146
chr17	29258427	29258882	Srsf3	+	.	-1	-1	.	.	0
chr13	63448418	63448606	Aopep	+	.	-1	-1	.	.	0
chrX	132973163	132973222	Cstf2	+	.	-1	-1	.	.	0
chr19	5770999	5771034	Ehbp1l1	-	.	-1	-1	.	.	0
chr19	3764046	3764624	1810055G02Rik	+	.	-1	-1	.	.	0
chr19	3764403	3764624	1810055G02Rik	+	.	-1	-1	.	.	0
chr19	3764406	3764624	1810055G02Rik	+	.	-1	-1	.	.	0
chr17	80585651	80585809	Dhx57	-	.	-1	-1	.	.	0
chr17	57008448	57008540	Ranbp3	+	.	-1	-1	.	.	0
chr17	25127384	25127401	Mapk8ip3	-	chr17	25125784	25128124	JIP_LZII	-	17
chr15	97698575	97698682	Hdac7	-	chr15	97693990	97700638	Hist_deacetyl	-	107
chr19	40332799	40332882	Sorbs1	-	.	-1	-1	.	.	0
chr15	90833208	90833246	Kif21a	-	.	-1	-1	.	.	0
chr15	83267823	83267828	Pacsin2	-	.	-1	-1	.	.	0
chr15	75769074	75769130	Eef1d	-	.	-1	-1	.	.	0
chr14	61436051	61436077	Sacs	+	.	-1	-1	.	.	0
chr14	52241429	52241572	Arhgef40	+	.	-1	-1	.	.	0
chr7	19118023	19118085	Ercc2	+	chr7	19116295	19120755	ResIII	+	62
chr7	19118023	19118085	Ercc2	+	chr7	19117940	19120906	DEAD_2	+	62
chr13	49357404	49357463	Card19	-	.	-1	-1	.	.	0
chr7	127086436	127086507	Fbrs	+	chr7	127086057	127088900	Auts2	+	71
chr5	114875408	114875497	Git2	-	chr5	114872001	114883493	GIT_CC	-	89
chr5	43395669	43395758	Cpeb2	+	.	-1	-1	.	.	0
chr1	171213727	171213801	Nectin4	+	.	-1	-1	.	.	0
chr5	139216881	139216991	Sun1	+	chr5	139209463	139220291	MRP	+	110
chr5	20866239	20866349	Magi2	+	.	-1	-1	.	.	0
chr10	53523078	53523224	Fam184a	-	.	-1	-1	.	.	0
chr2	165145585	165145620	Elmo2	-	chr2	165140653	165153625	DUF3361	-	35
chr9	44619690	44619818	Phldb1	-	.	-1	-1	.	.	0
chr4	76057530	76057538	Ptprd	-	chr4	76055057	76058889	Ig_2	-	8
chr4	76057530	76057538	Ptprd	-	chr4	76055078	76058913	I-set	-	8
chr4	76057530	76057538	Ptprd	-	chr4	76055093	76058916	Ig_3	-	8
chr5	134439807	134439962	Gtf2ird1	-	chr5	134433819	134439847	GTF2I	-	40
chr4	44031399	44031434	Clta	+	chr4	44012866	44032563	Clathrin_lg_ch	+	35
chr4	120568419	120568580	Kcnq4	-	.	-1	-1	.	.	0
chr1	133202530	133202616	Plekha6	+	.	-1	-1	.	.	0
chr1	133207110	133207190	Plekha6	+	.	-1	-1	.	.	0
chr6	113779446	113779505	Atp2b2	-	.	-1	-1	.	.	0
chr1	91004665	91004712	Lrrfip1	+	chr1	90996284	91050864	LRRFIP	+	47
chr1	91012667	91012726	Lrrfip1	+	chr1	90996284	91050864	LRRFIP	+	59
chr2	33033311	33033403	Ralgps1	-	chr2	33031021	33035463	PH	-	92
chr6	146494131	146494244	Fgfr1op2	+	chr6	146494212	146498828	SIKE	+	32
chr6	146494131	146494244	Fgfr1op2	+	chr6	146487184	146498828	SIKE	+	113
chr2	29090885	29090959	Ntng2	-	.	-1	-1	.	.	0
chr2	29093882	29094019	Ntng2	-	.	-1	-1	.	.	0
chr6	131352936	131353142	Ybx3	-	.	-1	-1	.	.	0
chrX	7634131	7634235	Tfe3	+	chrX	7632896	7635671	MITF_TFEB_C_3_N	+	104
chr8	4397713	4398339	Ccl25	+	.	-1	-1	.	.	0
chrX	7745866	7745916	Pim2	+	chrX	7744960	7748678	Pkinase	+	50
chrX	7745866	7745916	Pim2	+	chrX	7744963	7748663	PK_Tyr_Ser-Thr	+	50
chr7	44509783	44509854	Pnkp	+	chr7	44508165	44510618	PNK3P	+	71
chr7	35321729	35321773	Ankrd27	+	chr7	35321737	35326941	Ank_4	+	36
chr7	35321729	35321773	Ankrd27	+	chr7	35321740	35330687	Ank_2	+	33
chr6	17850355	17850423	St7	+	chr6	17694261	17942758	ST7	+	68
chr1	83243689	83243775	Sphkap	-	.	-1	-1	.	.	0
chr19	3832219	3832278	Kmt5b	+	.	-1	-1	.	.	0
chr6	29414784	29414978	Ccdc136	+	.	-1	-1	.	.	0
chr10	118002529	118002588	Mdm1	+	.	-1	-1	.	.	0
chr17	66349527	66349595	Ankrd12	-	.	-1	-1	.	.	0
chr5	115688641	115688955	Pxn	+	.	-1	-1	.	.	0
chr2	121157332	121157394	Ppip5k1	-	.	-1	-1	.	.	0
chr3	103260882	103260932	Trim33	+	chr3	103255637	103261039	Bromodomain	+	50
chr8	85327122	85327289	Cacna1a	+	chr8	85313770	85338973	Ion_trans	+	167
chr8	25404334	25404405	Adam32	-	chr8	25388550	25406339	Reprolysin	-	71
chr7	45758176	45758289	Abcc8	-	chr7	45757850	45766722	ABC_membrane	-	113
chr4	72087328	72087432	Tle1	-	chr4	72076627	72117607	TLE_N	-	104
chr10	17983418	17983495	Reps1	+	.	-1	-1	.	.	0
chr7	111936055	111936180	Mical2	+	.	-1	-1	.	.	0
chr4	144830183	144830257	Vps13d	-	.	-1	-1	.	.	0
chr8	26069735	26069809	Letm2	-	.	-1	-1	.	.	0
chr8	69277703	69277780	Ints10	+	.	-1	-1	.	.	0
chr2	30287030	30287158	Dolpp1	+	chr2	30285991	30287480	PAP2	+	128
chr8	118316002	118316091	Plcg2	+	.	-1	-1	.	.	0
chr8	123986169	123986252	Zfp276	+	.	-1	-1	.	.	0
chr8	126149931	126149984	Sipa1l2	-	chr8	126148643	126169462	SPAR_C	-	53
chr9	20987862	20987936	Gm38431	-	.	-1	-1	.	.	0
chr9	45842605	45842781	Gm48529	+	chr9	45842186	45842987	CH	-	176
chr9	58791752	58791910	Neo1	-	chr9	58784559	58796442	Neogenin_C	-	158
chr4	43260992	43261048	Unc13b	+	.	-1	-1	.	.	0
chr10	13879944	13880018	Hivep2	+	.	-1	-1	.	.	0
chr6	12045583	12045762	Phf14	+	chr6	12007061	12047931	PHD	+	179
chr10	79574161	79574283	Polrmt	-	chr10	79572070	79575126	RNA_pol	-	122
chr10	80627577	80627672	Dot1l	+	.	-1	-1	.	.	0
chr11	28342853	28342951	Ccdc85a	-	.	-1	-1	.	.	0
chr11	74754385	74754519	Sgsm2	-	.	-1	-1	.	.	0
chr11	87668592	87669431	Tspoap1	+	.	-1	-1	.	.	0
chr11	102109241	102109312	Hdac5	-	.	-1	-1	.	.	0
chr11	102109241	102109315	Hdac5	-	.	-1	-1	.	.	0
chr11	102401042	102401086	Gpatch8	-	chr11	102398984	102418992	G-patch	-	44
chr11	119999292	119999315	Slc38a10	-	.	-1	-1	.	.	0
chr12	44630449	44630574	Nrcam	+	.	-1	-1	.	.	0
chr12	44631617	44631769	Nrcam	+	.	-1	-1	.	.	0
chr12	44631617	44631769	Nrcam	+	.	-1	-1	.	.	0
chr5	146229448	146229576	Cdk8	+	chr5	146168574	146229510	PK_Tyr_Ser-Thr	+	62
chr5	146229448	146229576	Cdk8	+	chr5	146168577	146235684	Pkinase	+	128
chr12	80217459	80217539	Actn1	-	chr12	80217498	80218529	EF-hand_5	-	41
chr12	103062809	103062874	Unc79	+	.	-1	-1	.	.	0
chr7	79106182	79106259	Polg	-	.	-1	-1	.	.	0
chr15	58819174	58819368	Mtss1	-	.	-1	-1	.	.	0
chr13	103904565	103904729	Srek1	-	.	-1	-1	.	.	0
chr17	36207151	36207336	2310061I04Rik	-	.	-1	-1	.	.	0
chr7	34910859	34910921	Lrp3	-	.	-1	-1	.	.	0
chr16	20221009	20221083	Abcc5	-	chr16	20214830	20223372	ABC_membrane	-	74
chr12	51958987	51959013	Heatr5a	-	.	-1	-1	.	.	0

## Sheet: Long KCl exons
Supplemental Table 9. Overlap between frameshifted KCl-dependent exons and annotated Pfam domains mapped to mm39.
exon_chr	exon_start	exon_end	exon_gene_name	exon_strand	pfam_chr	pfam_start	pfam_end	pfam_domain	pfam_strand	bp_overlap
chrX	151150416	151150505	Gpr173	-	.	-1	-1	.	.	0
chrX	150999336	150999434	Iqsec2	+	chrX	150998627	151004659	IQ_SEC7_PH	+	98
chrX	150999336	150999461	Iqsec2	+	chrX	150998627	151004659	IQ_SEC7_PH	+	125
chrX	72840435	72840497	Pdzd4	-	chrX	72839993	72841808	PDZ_6	-	62
chrX	72840435	72840497	Pdzd4	-	chrX	72839999	72841883	PDZ	-	62
chrX	72722241	72722375	Slc6a8	+	chrX	72717547	72724257	SNF	+	134
chr19	27213639	27213761	Vldlr	+	chr19	27213644	27213761	Ldl_recept_a	+	117
chr19	3764046	3764624	1810055G02Rik	+	.	-1	-1	.	.	0
chr19	3764403	3764624	1810055G02Rik	+	.	-1	-1	.	.	0
chr19	3764406	3764624	1810055G02Rik	+	.	-1	-1	.	.	0
chr18	76419930	76420019	Smad2	+	chr18	76395682	76421185	MH1	+	89
chr18	61942002	61942031	Ablim3	-	chr18	61938175	61957009	AbLIM_anchor	-	29
chr18	59198906	59200060	Minar2	+	chr18	59195607	59208791	MINAR1_C	+	1154
chr18	34631020	34631211	Fam13b	-	chr18	34627338	34631063	RhoGAP	-	43
chr18	34467345	34467416	Srp19	+	chr18	34464809	34469192	SRP19	+	71
chr18	33943271	33943390	Epb41l4a	-	.	-1	-1	.	.	0
chr18	32562248	32562355	Bin1	+	.	-1	-1	.	.	0
chr18	32564723	32564794	Bin1	+	.	-1	-1	.	.	0
chr18	21157465	21157572	Rnf138	+	chr18	21153960	21157552	zf-Di19	+	87
chr18	3276693	3276728	Crem	-	.	-1	-1	.	.	0
chr17	56999520	56999720	Ranbp3	+	.	-1	-1	.	.	0
chr17	57008022	57008087	Ranbp3	+	.	-1	-1	.	.	0
chr17	56732326	56732925	Ptprs	-	chr17	56732360	56732609	fn3	-	249
chr17	46331916	46332047	Vegfa	-	chr17	46329786	46334995	VEGF_C	-	131
chr17	36214999	36215067	Atat1	-	.	-1	-1	.	.	0
chr17	25370677	25370727	Clcn7	+	chr17	25365813	25376226	Voltage_CLC	+	50
chr17	25127384	25127401	Mapk8ip3	-	chr17	25125784	25128124	JIP_LZII	-	17
chr19	10403662	10404030	Syt7	+	.	-1	-1	.	.	0
chr17	15280027	15280245	Ermard	+	.	-1	-1	.	.	0
chr16	91639515	91639529	Itsn1	+	chr16	91638423	91645696	SH3_2	+	14
chr16	91639515	91639529	Itsn1	+	chr16	91638429	91645684	SH3_1	+	14
chr16	91639515	91639529	Itsn1	+	chr16	91638432	91645696	SH3_9	+	14
chr16	58549520	58549585	Cldnd1	+	.	-1	-1	.	.	0
chr16	58549535	58549585	Cldnd1	+	.	-1	-1	.	.	0
chr16	35110396	35110560	Adcy5	+	.	-1	-1	.	.	0
chr16	32721002	32721076	Fyttd1	+	chr16	32698293	32725997	FYTT	+	74
chr16	31590574	31590672	Dlg1	+	chr16	31561923	31606932	MAGUK_N_PEST	+	98
chr16	30178486	30178566	Atp13a3	-	chr16	30174657	30178527	Cation_ATPase_N	-	41
chr16	18714652	18714795	Hira	+	chr16	18696259	18715235	WD40	+	143
chr16	16136627	16136704	Dnm1l	-	.	-1	-1	.	.	0
chr16	12070648	12070695	Shisa9	+	.	-1	-1	.	.	0
chr16	10456650	10456778	Clec16a	+	chr16	10394369	10559734	CLEC16A_C	+	128
chr15	102418353	102418439	Map3k12	-	.	-1	-1	.	.	0
chr19	40329128	40329193	Sorbs1	-	.	-1	-1	.	.	0
chr15	90832526	90832540	Kif21a	-	.	-1	-1	.	.	0
chr15	90835448	90835576	Kif21a	-	.	-1	-1	.	.	0
chr15	89011352	89011420	Hdac10	-	chr15	89010227	89012509	Hist_deacetyl	-	68
chr15	78321100	78321162	Kctd17	+	.	-1	-1	.	.	0
chr15	64616689	64616778	Adcy8	-	.	-1	-1	.	.	0
chr15	62021087	62021200	Pvt1	+	.	-1	-1	.	.	0
chr16	8420149	8420241	Abat	+	chr16	8399789	8436475	Aminotran_3	+	92
chr7	4141694	4141786	Leng8	+	.	-1	-1	.	.	0
chr7	4144021	4144131	Leng8	+	.	-1	-1	.	.	0
chr2	12386913	12386993	Mindy3	-	chr2	12369312	12423982	DUF4205	-	80
chr6	119921661	119921744	Wnk1	-	.	-1	-1	.	.	0
chr9	108395965	108396024	Qrich1	+	.	-1	-1	.	.	0
chr9	108395965	108396024	Qrich1	+	.	-1	-1	.	.	0
chr19	37083190	37083213	Cpeb3	-	.	-1	-1	.	.	0
chr6	86958277	86958378	Aak1	+	.	-1	-1	.	.	0
chr7	126551171	126551302	Sez6l2	+	.	-1	-1	.	.	0
chr4	155959685	155959822	Ints11	+	chr4	155956618	155970040	Lactamase_B_6	+	137
chr4	155959685	155959822	Ints11	+	chr4	155957354	155970031	Lactamase_B_2	+	137
chr4	155970548	155970616	Ints11	+	chr4	155970578	155971936	Beta-Casp	+	38
chr1	75290069	75290152	Dnpep	-	chr1	75285344	75293384	Peptidase_M18	-	83
chrX	142448728	142448838	Pak3	+	.	-1	-1	.	.	0
chr2	20888010	20888039	Arhgap21	-	.	-1	-1	.	.	0
chr16	52006711	52006842	Cblb	+	.	-1	-1	.	.	0
chr3	86700525	86700605	Dclk2	-	chr3	86699415	86722458	Pkinase	-	80
chr3	86700525	86700605	Dclk2	-	chr3	86700543	86722452	PK_Tyr_Ser-Thr	-	62
chr3	86738130	86738177	Dclk2	-	.	-1	-1	.	.	0
chr5	92211195	92211293	G3bp2	-	.	-1	-1	.	.	0
chr8	96437273	96437338	Ndrg4	+	chr8	96432815	96439810	Ndr	+	65
chr5	138614731	138614826	Zfp68	-	.	-1	-1	.	.	0
chr5	135084881	135085237	Bud23	-	chr5	135082235	135085715	WBS_methylT	-	356
chr5	135070090	135070164	Stx1a	+	chr5	135066042	135077850	Syntaxin	+	74
chr5	135070090	135070164	Stx1a	+	chr5	135066350	135071043	Syntaxin_2	+	74
chr5	123237899	123238015	Tmem120b	+	chr5	123214516	123254793	TMPIT	+	116
chr5	123242484	123242573	Tmem120b	+	chr5	123214516	123254793	TMPIT	+	89
chr5	122309884	122309988	Ppp1cc	+	chr5	122306359	122311211	Metallophos	+	104
chr5	110565708	110565812	Fbrsl1	-	.	-1	-1	.	.	0
chr5	114875408	114875497	Git2	-	chr5	114872001	114883493	GIT_CC	-	89
chr12	70314007	70314039	Trim9	-	.	-1	-1	.	.	0
chr9	48405582	48405686	Rbm7	-	chr9	48405325	48406547	RRM_5	-	104
chr9	48405582	48405686	Rbm7	-	chr9	48405334	48406517	RRM_1	-	104
chr1	176588916	176589065	Cep170	-	.	-1	-1	.	.	0
chr1	176588916	176589065	Cep170	-	.	-1	-1	.	.	0
chr5	139215507	139215698	Sun1	+	chr5	139209463	139220291	MRP	+	191
chr5	139216527	139216592	Sun1	+	chr5	139209463	139220291	MRP	+	65
chr5	139260201	139260263	Adap1	-	chr5	139259120	139260237	PH	-	36
chr5	30457707	30457781	Selenoi	+	chr5	30453427	30461152	CDP-OH_P_transf	+	74
chr8	95827274	95827300	Kifc3	-	.	-1	-1	.	.	0
chr4	155941952	155941990	Dvl1	+	chr4	155940985	155942790	Dsh_C	+	38
chr4	150989706	150989765	Park7	-	chr4	150981827	150992855	DJ-1_PfpI	-	59
chr15	102394382	102394474	Pcbp2	+	.	-1	-1	.	.	0
chr15	102397210	102397248	Pcbp2	+	.	-1	-1	.	.	0
chr15	102397210	102397248	Pcbp2	+	.	-1	-1	.	.	0
chr7	18815843	18815917	Dmwd	+	.	-1	-1	.	.	0
chr13	91790420	91790509	Ssbp2	+	chr13	91712777	91842194	SSDP	+	89
chr5	115469508	115469597	Srsf9	+	chr5	115468704	115470348	RRM_1	+	89
chr8	111455801	111455908	Mtss2	+	chr8	111448395	111455894	IMD	+	93
chr8	111463774	111463851	Mtss2	+	.	-1	-1	.	.	0
chr4	116467599	116468573	Nasp	-	.	-1	-1	.	.	0
chr4	107703435	107703815	Lrp8	+	chr4	107703437	107703542	Ldl_recept_a	+	105
chr4	107703435	107703815	Lrp8	+	chr4	107703551	107703662	Ldl_recept_a	+	111
chr4	107703435	107703815	Lrp8	+	chr4	107703707	107703815	Ldl_recept_a	+	108
chr4	102720858	102720929	Sgip1	+	.	-1	-1	.	.	0
chr4	102720861	102720929	Sgip1	+	.	-1	-1	.	.	0
chr19	45038666	45038764	Sfxn3	+	chr19	45037569	45043137	SFXNs	+	98
chr2	48976601	48976663	Mbd5	+	.	-1	-1	.	.	0
chr4	76057530	76057538	Ptprd	-	chr4	76055057	76058889	Ig_2	-	8
chr4	76057530	76057538	Ptprd	-	chr4	76055078	76058913	I-set	-	8
chr4	76057530	76057538	Ptprd	-	chr4	76055093	76058916	Ig_3	-	8
chr6	103691405	103691566	Chl1	+	.	-1	-1	.	.	0
chr2	29569748	29569861	Rapgef1	+	.	-1	-1	.	.	0
chr10	127129580	127129627	Ddit3	+	.	-1	-1	.	.	0
chr5	134533587	134533691	Clip2	-	.	-1	-1	.	.	0
chr1	162503173	162503409	Prrc2c	-	.	-1	-1	.	.	0
chr8	8673147	8673239	Efnb2	-	chr8	8673154	8710518	Ephrin	-	85
chr6	35001062	35001274	Cnot4	-	.	-1	-1	.	.	0
chr18	14770448	14770540	Ss18	-	.	-1	-1	.	.	0
chr6	140482731	140482748	Plekha5	+	.	-1	-1	.	.	0
chr6	140514571	140514606	Plekha5	+	.	-1	-1	.	.	0
chr1	91036301	91036393	Lrrfip1	+	chr1	90996284	91050864	LRRFIP	+	92
chr4	132384888	132384926	Eya3	+	.	-1	-1	.	.	0
chr2	33226524	33226631	Ralgps1	-	chr2	33064516	33226548	RasGEF	-	24
chr10	80446861	80446962	Scamp4	+	chr10	80445168	80450458	SCAMP	+	101
chr2	26278503	26278571	Entr1	-	.	-1	-1	.	.	0
chr2	26278503	26278571	Entr1	-	.	-1	-1	.	.	0
chr2	26230416	26230595	Gpsm1	+	.	-1	-1	.	.	0
chr2	118495263	118495346	Pak6	+	.	-1	-1	.	.	0
chr6	125001467	125001514	Zfp384	+	.	-1	-1	.	.	0
chrX	94991003	94991053	Las1l	-	.	-1	-1	.	.	0
chr2	35611272	35611424	Dab2ip	+	chr2	35608800	35620436	DUF3498	+	152
chr2	157403132	157403212	Nnat	+	.	-1	-1	.	.	0
chr2	91635368	91635454	Ambra1	+	.	-1	-1	.	.	0
chr2	30273601	30273717	Miga2	+	chr2	30257796	30274069	Miga	+	116
chr6	30427707	30427793	Klhdc10	+	.	-1	-1	.	.	0
chr10	116363731	116363853	Cnot2	-	.	-1	-1	.	.	0
chr3	88718520	88718675	1500004A13Rik	-	.	-1	-1	.	.	0
chr5	134301377	134301439	Gtf2i	-	.	-1	-1	.	.	0
chr10	117197678	117197788	Cpsf6	-	.	-1	-1	.	.	0
chr2	25184449	25184559	Grin1	-	.	-1	-1	.	.	0
chr7	89855367	89855468	Picalm	+	.	-1	-1	.	.	0
chr18	25153718	25153813	Fhod3	+	.	-1	-1	.	.	0
chr3	109746435	109746494	Ntng1	-	.	-1	-1	.	.	0
chr5	134653294	134653353	Eif4h	-	.	-1	-1	.	.	0
chr1	93555375	93555431	Stk25	-	chr1	93553289	93556959	Pkinase	-	56
chr1	93555375	93555431	Stk25	-	chr1	93553301	93556950	PK_Tyr_Ser-Thr	-	56
chr1	136101209	136101388	Kif21b	+	chr1	136100660	136101799	WD40	+	179
chr4	126132314	126132424	Map7d1	-	.	-1	-1	.	.	0
chr1	133583082	133583135	Zc3h11a	-	.	-1	-1	.	.	0
chr1	40039047	40039133	Map4k4	+	.	-1	-1	.	.	0
chr17	27180042	27180083	Syngap1	+	chr17	27179347	27189535	DUF3498	+	41
chr3	88065527	88065661	Mef2d	+	chr3	88065370	88066494	HJURP_C	+	134
chr10	90750557	90750628	Anks1b	+	.	-1	-1	.	.	0
chr11	50058995	50059051	Tbc1d9b	+	.	-1	-1	.	.	0
chr5	30506006	30506092	Drc1	+	.	-1	-1	.	.	0
chr5	33885535	33885588	Fgfr3	+	.	-1	-1	.	.	0
chr4	81235830	81235940	Mpdz	-	chr4	81235863	81238654	PDZ_6	-	77
chr4	81235830	81235940	Mpdz	-	chr4	81235866	81238741	PDZ	-	74
chr1	83243689	83243775	Sphkap	-	.	-1	-1	.	.	0
chr1	22503022	22503093	Rims1	-	.	-1	-1	.	.	0
chr9	31078856	31079023	Aplp2	-	chr9	31078863	31079022	Kunitz_BPTI	-	159
chr6	5784438	5784497	Dync1i1	+	.	-1	-1	.	.	0
chr11	6348261	6348338	Zmiz2	+	.	-1	-1	.	.	0
chr12	111618391	111618417	Mark3	+	.	-1	-1	.	.	0
chr1	87863059	87863172	Dgkd	+	chr1	87859675	87864068	DAGK_acc	+	113
chr14	20761112	20761189	Zswim8	+	.	-1	-1	.	.	0
chr1	174903582	174903662	Rgs7	-	.	-1	-1	.	.	0
chr8	84652890	84652904	Adgrl1	+	.	-1	-1	.	.	0
chr1	84773410	84773535	Trip12	-	.	-1	-1	.	.	0
chr3	136637771	136637800	Ppp3ca	+	.	-1	-1	.	.	0
chr10	90988946	90989041	Tmpo	-	.	-1	-1	.	.	0
chr1	131092356	131092505	Eif2d	+	.	-1	-1	.	.	0
chr6	21950036	21950107	Ing3	+	chr6	21949770	21965777	ING	+	71
chr7	122779471	122779617	Tnrc6a	+	.	-1	-1	.	.	0
chr3	102947756	102947848	Csde1	+	.	-1	-1	.	.	0
chr17	66349527	66349595	Ankrd12	-	.	-1	-1	.	.	0
chr2	156375700	156375786	Epb41l1	+	.	-1	-1	.	.	0
chr2	156376605	156376688	Epb41l1	+	chr2	156376614	156379367	4_1_CTD	+	74
chr12	16863847	16863912	E2f6	+	.	-1	-1	.	.	0
chr8	13063914	13064006	Mcf2l	+	.	-1	-1	.	.	0
chr8	13064818	13064892	Mcf2l	+	.	-1	-1	.	.	0
chr1	179951488	179951526	Cdc42bpa	+	.	-1	-1	.	.	0
chr2	117093319	117093399	Fam98b	+	chr2	117080296	117101182	DUF2465	+	80
chrX	133347710	133347775	Drp2	+	.	-1	-1	.	.	0
chr16	17393944	17394066	Slc7a4	-	.	-1	-1	.	.	0
chr5	9198899	9199021	Dmtf1	-	chr5	9151317	9202972	DUF2678	+	122
chr1	159679526	159680002	Tnr	+	chr1	159679633	159679720	EGF_Tenascin	+	87
chr1	159679526	159680002	Tnr	+	chr1	159679729	159679810	EGF_Tenascin	+	81
chr1	159679526	159680002	Tnr	+	chr1	159679822	159679906	EGF_Tenascin	+	84
chr1	159679526	159680002	Tnr	+	chr1	159679924	159679999	EGF_Tenascin	+	75
chr12	98600482	98600577	Spata7	+	chr12	98598229	98635411	HSD3	+	95
chr5	100124392	100124448	Hnrnpd	-	chr5	100114041	100126483	CBFNT	-	56
chr10	128317550	128317642	Smarcc2	+	chr10	128295204	128326238	SWIRM-assoc_2	+	92
chr18	38431361	38431447	Rnf14	+	.	-1	-1	.	.	0
chr7	130345273	130345413	Tacc2	+	.	-1	-1	.	.	0
chr6	120923513	120923563	Mical3	-	chr6	120911673	120929346	DUF3585	-	50
chr2	62095385	62095522	Slc4a10	+	chr2	62094395	62134252	HCO3_cotransp	+	137
chr3	108335176	108335247	Sars	-	chr3	108334630	108336751	tRNA-synt_2b	-	71
chr17	35361473	35361580	Bag6	+	.	-1	-1	.	.	0
chr17	35365732	35365878	Bag6	+	.	-1	-1	.	.	0
chr7	15847036	15847113	Napa	+	chr7	15847051	15847087	NSF	+	36
chr7	15847036	15847113	Napa	+	chr7	15832625	15850466	SNAP	+	77
chr2	155857296	155857310	Ergic3	+	chr2	155852424	155860007	COPIIcoated_ERV	+	14
chr4	129077393	129077509	S100pbp	-	.	-1	-1	.	.	0
chr10	81301800	81301862	Celf5	-	.	-1	-1	.	.	0
chr1	66767602	66767733	Kansl1l	-	.	-1	-1	.	.	0
chr3	88132745	88132876	Gm3764	+	.	-1	-1	.	.	0
chr19	6500560	6500628	Nrxn2	+	.	-1	-1	.	.	0
chr10	81480809	81480976	Ankrd24	+	.	-1	-1	.	.	0
chr3	90409422	90409559	Chtop	-	chr3	90407229	90410433	FoP_duplication	-	137
chr9	44874634	44874729	Ube4a	-	.	-1	-1	.	.	0
chr3	30666617	30666700	Mynn	+	chr3	30666628	30666697	zf-met	+	69
chr3	30666617	30666700	Mynn	+	chr3	30666628	30666697	zf-C2H2_6	+	69
chr3	30666617	30666700	Mynn	+	chr3	30666628	30666697	zf-C2H2_4	+	69
chr3	30666617	30666700	Mynn	+	chr3	30666628	30666697	zf-C2H2	+	69
chr3	34119122	34119202	Fxr1	+	chr3	34116155	34119124	FXR_C1	+	2
chr3	34119122	34119202	Fxr1	+	chr3	34116155	34119124	FXR_C1	+	2
chr5	112376174	112376221	Miat	-	.	-1	-1	.	.	0
chr13	119601100	119601225	4833420G17Rik	+	.	-1	-1	.	.	0
chr6	86372895	86373101	Pcyox1	-	chr6	86371542	86373079	Amino_oxidase	-	184
chr6	86372895	86373101	Pcyox1	-	chr6	86372896	86373100	NAD_binding_8	-	204
chr2	24546722	24546733	Cacna1b	-	chr2	24540471	24548972	Ion_trans	-	11
chr11	59632816	59632923	Mprip	+	.	-1	-1	.	.	0
chr11	59635577	59635645	Mprip	+	chr11	59634610	59640419	PH	+	68
chr11	59648349	59652152	Mprip	+	.	-1	-1	.	.	0
chr11	59662977	59663042	Mprip	+	.	-1	-1	.	.	0
chr6	48059087	48059200	Zfp746	-	chr6	48059199	48060242	KRAB	-	1
chr18	61704944	61705027	Csnk1a1	+	chr18	61702546	61709620	Pkinase_fungal	+	83
chr18	61704944	61705027	Csnk1a1	+	chr18	61688869	61710278	Pkinase	+	83
chr18	61704944	61705027	Csnk1a1	+	chr18	61688872	61710305	PK_Tyr_Ser-Thr	+	83
chr3	105574277	105574333	Kcnd3	+	chr3	105572805	105575563	DUF3399	+	56
chr16	4752058	4752102	Mgrn1	+	.	-1	-1	.	.	0
chr3	108262787	108262885	Sort1	+	.	-1	-1	.	.	0
chr3	122345784	122345798	Fnbp1l	-	.	-1	-1	.	.	0
chr3	122350060	122350218	Fnbp1l	-	.	-1	-1	.	.	0
chr1	160863664	160863813	Gas5	+	.	-1	-1	.	.	0
chr1	160863787	160863813	Gas5	+	.	-1	-1	.	.	0
chr18	74010500	74010607	Mro	+	.	-1	-1	.	.	0
chr9	113689187	113689204	Clasp2	+	.	-1	-1	.	.	0
chr9	113704332	113704394	Clasp2	+	.	-1	-1	.	.	0
chr9	113707817	113707840	Clasp2	+	.	-1	-1	.	.	0
chrX	134644190	134644270	Gprasp1	+	.	-1	-1	.	.	0
chr7	100467942	100467968	Fam168a	+	chr7	100436028	100484643	TCRP1	+	26
chr9	45583923	45584219	Dscaml1	+	chr9	45583931	45584177	Ig_3	+	246
chr9	45583923	45584219	Dscaml1	+	chr9	45583931	45584189	Ig_2	+	258
chr9	45583923	45584219	Dscaml1	+	chr9	45583931	45584216	I-set	+	285
chr9	45583923	45584219	Dscaml1	+	chr9	45583961	45584198	ig	+	237
chr7	34910859	34910921	Lrp3	-	.	-1	-1	.	.	0
chr7	141554578	141554625	Brsk2	+	.	-1	-1	.	.	0
chr7	141554578	141554625	Brsk2	+	.	-1	-1	.	.	0
chr7	141554578	141554625	Brsk2	+	.	-1	-1	.	.	0
chr7	102077980	102078072	Stim1	+	.	-1	-1	.	.	0
chr11	100393985	100394014	Acly	-	.	-1	-1	.	.	0
chr13	111584429	111584488	Gpbp1	-	.	-1	-1	.	.	0
chr7	108623696	108623863	Tub	+	chr7	108619769	108625820	Tub_N	+	167
chr8	4251933	4251965	Evi5l	+	.	-1	-1	.	.	0
chr1	37932023	37932103	Mrpl30	+	.	-1	-1	.	.	0
chr4	115865376	115865489	Faah	-	chr4	115855737	115865400	Amidase	-	24
chr8	45465055	45465123	Fat1	+	chr8	45463623	45466140	Cadherin	+	68
chr8	45500686	45500745	Fat1	+	.	-1	-1	.	.	0
chr1	85723077	85723193	Cab39	+	.	-1	-1	.	.	0
chr5	107958155	107958187	Evi5	-	.	-1	-1	.	.	0
chr8	61987891	61987941	Palld	-	.	-1	-1	.	.	0
chr8	69277703	69277780	Ints10	+	.	-1	-1	.	.	0
chr8	70840724	70840810	Crtc1	-	.	-1	-1	.	.	0
chr2	30286443	30286541	Dolpp1	+	chr2	30285991	30287480	PAP2	+	98
chr2	30287479	30287568	Dolpp1	+	chr2	30285991	30287480	PAP2	+	1
chr11	51668313	51668387	Sar1b	+	chr11	51668363	51682264	Arf	+	24
chr8	106203002	106203160	Zdhhc1	-	chr8	106202730	106205418	DHHC	-	158
chr8	110403389	110403481	Ist1	-	.	-1	-1	.	.	0
chr9	18380574	18380843	Zfp558	-	.	-1	-1	.	.	0
chr11	5931069	5931113	Camk2b	-	.	-1	-1	.	.	0
chr5	123581938	123582027	Mlxip	+	.	-1	-1	.	.	0
chr11	70126521	70126625	0610010K14Rik	-	.	-1	-1	.	.	0
chr11	70127702	70127803	0610010K14Rik	-	.	-1	-1	.	.	0
chr7	64399850	64399990	Apba2	+	chr7	64395514	64402833	PDZ	+	140
chr7	64399850	64399990	Apba2	+	chr7	64399850	64399991	PDZ_6	+	140
chr9	86656249	86656332	Snap91	-	.	-1	-1	.	.	0
chrX	150589271	150589402	Huwe1	+	.	-1	-1	.	.	0
chr13	58164259	58164360	Klhl3	-	chr13	58164296	58166683	Kelch_1	-	64
chr13	58164259	58164360	Klhl3	-	chr13	58161662	58164293	Kelch_1	-	34
chr14	31806863	31807063	Dph3	-	chr14	31805140	31807459	zf-CSL	-	200
chr8	72114462	72114494	Unc13a	-	.	-1	-1	.	.	0
chr10	14536809	14536895	Vta1	-	.	-1	-1	.	.	0
chr10	78120828	78120938	Agpat3	-	chr10	78118281	78120918	Acyltransferase	-	90
chr17	62920310	62920390	Efna5	-	.	-1	-1	.	.	0
chr10	81026875	81026901	Dapk3	+	chr10	81019883	81028173	Pkinase	+	26
chr10	81026875	81026901	Dapk3	+	chr10	81019886	81028152	PK_Tyr_Ser-Thr	+	26
chr10	85900659	85900793	Syn3	-	chr10	85900704	86190254	Synapsin_C	-	89
chr10	126828467	126828505	Ctdsp2	+	.	-1	-1	.	.	0
chr10	126932783	126932947	Os9	-	.	-1	-1	.	.	0
chr15	34121568	34121657	Mtdh	+	chr15	34083196	34131428	LYRIC	+	89
chr15	34121568	34121657	Mtdh	+	chr15	34083196	34131428	LYRIC	+	89
chr11	6383723	6383836	H2az2	-	chr11	6379138	6389438	Histone	-	113
chr5	100183493	100183597	Hnrnpdl	-	.	-1	-1	.	.	0
chr11	12315104	12315178	Cobl	-	.	-1	-1	.	.	0
chr16	90737360	90737380	Synj1	-	.	-1	-1	.	.	0
chr16	90737360	90737383	Synj1	-	.	-1	-1	.	.	0
chr11	69721388	69721438	Nlgn2	-	chr11	69716736	69725141	COesterase	-	50
chr5	84381441	84381776	Epha5	-	chr5	84381499	84381769	fn3	-	270
chr5	84385257	84385412	Epha5	-	chr5	84385318	84479111	Ephrin_rec_like	-	94
chr17	85322836	85322862	Ppm1b	+	.	-1	-1	.	.	0
chr11	80148339	80148461	Rhot1	+	.	-1	-1	.	.	0
chr3	94896613	94896657	Pi4kb	+	.	-1	-1	.	.	0
chr11	83255620	83255661	Ap2b1	+	.	-1	-1	.	.	0
chr11	87672127	87672195	Tspoap1	+	.	-1	-1	.	.	0
chr11	94314496	94314549	Cacna1g	-	.	-1	-1	.	.	0
chr5	129636532	129636684	Sfswap	+	.	-1	-1	.	.	0
chr17	35124585	35124686	Ehmt2	+	.	-1	-1	.	.	0
chr11	102201751	102201861	Ubtf	-	chr11	102201384	102202277	HMG_box	-	110
chr7	126270905	126271051	Sgf29	+	chr7	126270957	126271840	DUF1325	+	94
chr2	30025420	30025563	Tbc1d13	+	.	-1	-1	.	.	0
chr7	34047350	34047406	Lsm14a	-	.	-1	-1	.	.	0
chrX	133619474	133619566	Armcx1	+	.	-1	-1	.	.	0
chr17	26077709	26077777	Wdr90	-	.	-1	-1	.	.	0
chr12	103062809	103062874	Unc79	+	.	-1	-1	.	.	0
chr12	106037828	106037899	Vrk1	+	.	-1	-1	.	.	0
chr12	106039877	106039936	Vrk1	+	.	-1	-1	.	.	0
chr12	113083830	113083880	Mta1	+	chr12	113062046	113086796	BAH	+	50
chr13	48751233	48751415	Ptpdc1	-	.	-1	-1	.	.	0
chr10	81151712	81151789	Pip5k1c	+	.	-1	-1	.	.	0
chr1	87896117	87896170	Usp40	-	.	-1	-1	.	.	0
chr2	143792347	143792442	Rrbp1	-	.	-1	-1	.	.	0
chr14	20791445	20791558	Camk2g	-	chr14	20787356	20791447	CaMKII_AD	-	2
chr9	113788443	113788550	Ubp1	+	.	-1	-1	.	.	0
chr19	3931997	3932119	Chka	+	chr19	3914711	3939985	Choline_kinase	+	122
chr19	10400148	10400375	Syt7	+	.	-1	-1	.	.	0
chr17	8394350	8394409	Cep43	+	.	-1	-1	.	.	0
chr16	44565757	44565855	Gtpbp8	-	chr16	44560477	44566565	FeoB_N	-	98
chr16	44565757	44565855	Gtpbp8	-	chr16	44560495	44566565	MMR_HSR1	-	98
chr16	44565757	44565855	Gtpbp8	-	chr16	44562902	44566568	SRPRB	-	98
chr15	102086961	102087050	Csad	-	chr15	102086215	102096725	Pyridoxal_deC	-	89
chr19	40365088	40365246	Sorbs1	-	.	-1	-1	.	.	0
chr1	193036131	193036172	Camk1g	-	chr1	193031110	193044340	Pkinase	-	41
chr1	193036131	193036172	Camk1g	-	chr1	193032599	193044340	PK_Tyr_Ser-Thr	-	41
chr1	193036131	193036172	Camk1g	-	chr1	193033370	193037332	Kinase-like	-	41
chr7	6373957	6374103	Zfp78	+	.	-1	-1	.	.	0
chrX	70164963	70165073	Mamld1	+	.	-1	-1	.	.	0
chr10	80545922	80546125	Ap3d1	-	.	-1	-1	.	.	0
chr7	45032548	45032607	Snrnp70	-	chr7	45030144	45036827	RRM_5	-	59
chr7	45032548	45032607	Snrnp70	-	chr7	45030195	45036832	RRM_1	-	59
chr4	63347322	63347354	Whrn	-	.	-1	-1	.	.	0
chr1	58573643	58573810	Fam126b	-	.	-1	-1	.	.	0
chr2	76390529	76390603	Osbpl6	+	.	-1	-1	.	.	0
chr3	97616797	97616949	Pde4dip	-	.	-1	-1	.	.	0
chr8	11673696	11673857	Ankrd10	-	chr8	11669287	11678521	Ank	-	161
chr8	11673696	11673857	Ankrd10	-	chr8	11669215	11685545	Ank_2	-	161
chr8	11673696	11673857	Ankrd10	-	chr8	11669218	11682910	Ank_4	-	161
chr8	11673696	11673857	Ankrd10	-	chr8	11669257	11682898	Ank_5	-	161
chr13	74760842	74761066	Gm46430	-	.	-1	-1	.	.	0
chr5	112584148	112584339	Sez6l	-	chr5	112584152	112584332	Sushi	-	180
chr7	44250292	44250351	Kcnc3	+	.	-1	-1	.	.	0
chr17	32552879	32552953	Akap8l	-	.	-1	-1	.	.	0
chr3	33134613	33134684	Pex5l	-	.	-1	-1	.	.	0
chr11	62424871	62425047	Cenpv	-	chr11	62416084	62427112	GFA	-	176
chrX	55539492	55539602	Ints6l	+	.	-1	-1	.	.	0
chr19	7207312	7207470	Naa40	-	chr19	7205724	7207455	Acetyltransf_1	-	143
chr16	36962637	36962807	Stxbp5l	-	.	-1	-1	.	.	0
chr11	112958167	112958211	2610035D17Rik	-	.	-1	-1	.	.	0
chr15	48177194	48177505	Csmd3	-	.	-1	-1	.	.	0
chr15	76384330	76384395	Hsf1	+	chr15	76382368	76384819	Vert_HS_TF	+	65
chr2	91513147	91513245	Atg13	-	.	-1	-1	.	.	0
chr8	46617798	46617932	Cfap97	+	.	-1	-1	.	.	0
chr5	8562260	8562406	Rundc3b	-	.	-1	-1	.	.	0
chr14	9983169	9983237	Cadps	+	chr14	9980704	10095987	MUN	+	68
chrX	151053689	151053826	Kdm5c	+	.	-1	-1	.	.	0
chrX	133708202	133708261	Armcx2	-	.	-1	-1	.	.	0
chrX	72841799	72841897	Pdzd4	-	chrX	72839993	72841808	PDZ_6	-	9
chrX	72841799	72841897	Pdzd4	-	chrX	72839999	72841883	PDZ	-	84
chrX	70436901	70437050	Mtmr1	+	chrX	70435395	70454443	Myotub-related	+	149
chrX	7506096	7506161	Syp	+	chrX	7506119	7514843	MARVEL	+	42
chr19	60525851	60525940	Cacul1	-	chr19	60517926	60552691	Cullin	-	89
chr19	42174058	42174078	Zfyve27	+	.	-1	-1	.	.	0
chr19	42104945	42105004	Pi4k2a	+	chr19	42079336	42108240	PI3_PI4_kinase	+	59
chr19	27217244	27217369	Vldlr	+	chr19	27217140	27217351	EGF_CA	+	107
chr19	27217244	27217369	Vldlr	+	chr19	27217282	27217333	hEGF	+	51
chr19	23998969	23999025	Fam189a2	-	chr19	23963811	24008028	CD20	-	56
chr19	7207552	7207647	Naa40	-	.	-1	-1	.	.	0
chr19	3932009	3932119	Chka	+	chr19	3914711	3939985	Choline_kinase	+	110
chr19	3509746	3509763	Ppp6r3	-	.	-1	-1	.	.	0
chr18	47403675	47403860	Sema6a	-	.	-1	-1	.	.	0
chr17	79252369	79252512	Ndufaf7	+	chr17	79247023	79253847	Methyltransf_28	+	143
chr17	74901358	74901447	Birc6	+	.	-1	-1	.	.	0
chr17	57008448	57008540	Ranbp3	+	.	-1	-1	.	.	0
chr17	26000166	26000351	Ciao3	+	chr17	25996325	26001006	Fe_hyd_lg_C	+	185
chr17	26000166	26000351	Ciao3	+	chr17	25999124	26002842	HAGH_C	-	185
chr17	24733686	24733802	Traf7	-	.	-1	-1	.	.	0
chr16	73695799	73696071	Robo2	-	.	-1	-1	.	.	0
chr16	50029447	50029506	Bbx	-	.	-1	-1	.	.	0
chr16	36572633	36572737	Slc15a2	-	chr16	36572648	36573453	PTR2	-	89
chr16	31784562	31784645	Senp5	-	chr16	31782256	31802328	Peptidase_C48	-	83
chr16	16136627	16136704	Dnm1l	-	.	-1	-1	.	.	0
chr16	11811857	11811913	Shisa9	+	chr16	11802657	12062536	Shisa	+	56
chr15	90860673	90860711	Kif21a	-	.	-1	-1	.	.	0
chr15	80767144	80767302	Tnrc6b	+	chr15	80765403	80771201	Ago_hook	+	158
chr15	78862813	78862950	Triobp	+	.	-1	-1	.	.	0
chrX	13417185	13417220	Cask	-	chrX	13415420	13421118	SH3_2	-	35
chr15	41712065	41712145	Oxr1	+	.	-1	-1	.	.	0
chr15	39767934	39767990	Lrp12	-	.	-1	-1	.	.	0
chr16	8428990	8429157	Abat	+	chr16	8399789	8436475	Aminotran_3	+	167
chr15	79621673	79621768	Sun2	-	.	-1	-1	.	.	0
chr18	67645910	67645948	Spire1	-	.	-1	-1	.	.	0
chr16	17346798	17346938	Thap7	-	chr16	17346896	17348709	THAP	-	42
chr16	17348093	17348248	Thap7	-	chr16	17346896	17348709	THAP	-	155
chrX	156673078	156673167	Cnksr2	-	chrX	156671516	156693186	DUF1170	-	89
chr9	108715958	108715972	Celsr3	+	chr9	108715670	108717266	HRM	+	14
chr4	150523799	150523924	Rere	+	chr4	150491105	150584472	BAH	+	125
chr6	118615387	118615470	Cacna1c	-	chr6	118590271	118629675	Ion_trans	-	83
chr6	118615387	118615470	Cacna1c	-	chr6	118590289	118629001	PKD_channel	-	83
chr8	47644667	47644720	Stox2	-	.	-1	-1	.	.	0
chr14	93797911	93798012	Pcdh9	-	.	-1	-1	.	.	0
chr14	93797911	93798012	Pcdh9	-	.	-1	-1	.	.	0
chr4	53724604	53724741	Fktn	+	chr4	53720104	53744672	FKTN_N	+	137
chr2	20858768	20858788	Arhgap21	-	.	-1	-1	.	.	0
chr18	74408974	74409141	Mbd1	+	chr18	74408986	74409127	zf-CXXC	+	141
chr13	83773383	83773442	Mef2c	+	chr13	83773413	83781233	HJURP_C	+	29
chr6	6825841	6826005	Dlx6os1	-	.	-1	-1	.	.	0
chr7	6721424	6721846	Peg3	-	.	-1	-1	.	.	0
chr5	138614731	138614820	Zfp68	-	.	-1	-1	.	.	0
chr11	6534519	6534602	Ccm2	+	.	-1	-1	.	.	0
chr7	46782785	46782853	Ptpn5	-	.	-1	-1	.	.	0
chr5	124551247	124551351	Sbno1	-	.	-1	-1	.	.	0
chr5	124551247	124551351	Sbno1	-	.	-1	-1	.	.	0
chr5	123237899	123238015	Tmem120b	+	chr5	123214516	123254793	TMPIT	+	116
chr5	123239687	123239746	Tmem120b	+	chr5	123214516	123254793	TMPIT	+	59
chr5	123242484	123242573	Tmem120b	+	chr5	123214516	123254793	TMPIT	+	89
chr8	16048751	16048864	Csmd1	-	chr8	16048755	16049843	Sushi	-	109
chr4	9598732	9598779	Asph	-	.	-1	-1	.	.	0
chr4	9607796	9607870	Asph	-	chr4	9604627	9639324	Asp-B-Hydro_N	-	74
chr5	110519411	110519488	Fbrsl1	-	chr5	110511738	110524121	Auts2	-	77
chr8	70586875	70586955	Rfxank	-	chr8	70586111	70588030	Ank_2	-	80
chr8	70586875	70586955	Rfxank	-	chr8	70586897	70587727	Ank_5	-	58
chr8	70586875	70586955	Rfxank	-	chr8	70586936	70587325	Ank	-	19
chr8	70586875	70586955	Rfxank	-	chr8	70586939	70587328	Ank_3	-	16
chr10	69816653	69816679	Ank3	+	.	-1	-1	.	.	0
chr5	73257288	73257374	Fryl	-	.	-1	-1	.	.	0
chr12	70314007	70314039	Trim9	-	.	-1	-1	.	.	0
chr12	70314007	70314039	Trim9	-	.	-1	-1	.	.	0
chr9	56581706	56581792	Lingo1	-	.	-1	-1	.	.	0
chr9	56592403	56592564	Lingo1	-	.	-1	-1	.	.	0
chr9	56592403	56592564	Lingo1	-	.	-1	-1	.	.	0
chr9	56631584	56631628	Lingo1	-	.	-1	-1	.	.	0
chr9	56631584	56631628	Lingo1	-	.	-1	-1	.	.	0
chr5	144746960	144747013	Trrap	+	.	-1	-1	.	.	0
chr5	139216881	139216991	Sun1	+	chr5	139209463	139220291	MRP	+	110
chr4	155902995	155903120	Ccnl2	+	chr4	155902388	155905444	Cyclin_C	+	125
chr10	53523078	53523224	Fam184a	-	.	-1	-1	.	.	0
chr4	155353489	155353608	Prkcz	-	chr4	155352172	155374204	Pkinase	-	119
chr4	155353489	155353608	Prkcz	-	chr4	155352223	155374204	PK_Tyr_Ser-Thr	-	119
chr15	102394382	102394474	Pcbp2	+	.	-1	-1	.	.	0
chr9	44619690	44619818	Phldb1	-	.	-1	-1	.	.	0
chr4	155835893	155836048	Atad3a	-	chr4	155835941	155845352	DUF3523	-	107
chr8	110557244	110557252	Ap1g1	+	chr8	110529647	110580267	Adaptin_N	+	8
chr8	110557244	110557252	Ap1g1	+	chr8	110553250	110559842	Cnd1	+	8
chr12	109609847	109609894	Rian	+	.	-1	-1	.	.	0
chr12	109611237	109611335	Rian	+	.	-1	-1	.	.	0
chr12	109611237	109611335	Rian	+	.	-1	-1	.	.	0
chr4	107727208	107727384	Lrp8	+	.	-1	-1	.	.	0
chr4	129586225	129586308	Tmem39b	-	chr4	129570403	129587065	Tmp39	-	83
chr2	52006679	52006756	Rif1	+	.	-1	-1	.	.	0
chr17	30372276	30372341	Zfand3	+	.	-1	-1	.	.	0
chr4	70255577	70255795	Cdk5rap2	-	.	-1	-1	.	.	0
chr4	63900887	63901159	Tnc	-	chr4	63900924	63901149	fn3	-	225
chr4	57886288	57886326	Pakap	+	chr4	57883132	57892940	AKAP2_C	+	38
chr4	57709450	57710142	Pakap	+	chr4	57568412	57757601	Paralemmin	+	692
chr18	6057516	6057590	Arhgap12	-	.	-1	-1	.	.	0
chrX	7666774	7666821	Gripap1	+	.	-1	-1	.	.	0
chr9	48944876	48944971	Usp28	+	.	-1	-1	.	.	0
chr6	39625754	39625789	Braf	-	.	-1	-1	.	.	0
chr5	31403665	31403688	Nrbp1	+	chr5	31401545	31406967	Pkinase	+	23
chr5	31403665	31403688	Nrbp1	+	chr5	31401617	31406952	PK_Tyr_Ser-Thr	+	23
chr2	70599205	70599273	Tlk1	-	.	-1	-1	.	.	0
chr1	162503173	162503409	Prrc2c	-	.	-1	-1	.	.	0
chr2	119642078	119642170	Tyro3	+	chr2	119641029	119647182	Pkinase	+	92
chr2	119642078	119642170	Tyro3	+	chr2	119641029	119647197	PK_Tyr_Ser-Thr	+	92
chr5	123773236	123773340	Clip1	-	.	-1	-1	.	.	0
chr13	55624448	55624585	Dbn1	-	.	-1	-1	.	.	0
chr6	140514571	140514606	Plekha5	+	.	-1	-1	.	.	0
chr11	4435878	4435988	Mtmr3	-	.	-1	-1	.	.	0
chr2	26303690	26303749	Sec16a	-	.	-1	-1	.	.	0
chr2	66118066	66118119	Scn1a	-	chr2	66116257	66132768	Ion_trans	-	53
chr2	66119217	66119498	Scn1a	-	chr2	66116257	66132768	Ion_trans	-	281
chr1	34340941	34341012	Dst	+	chr1	34334375	34341912	GAS2	+	71
chr2	29088825	29088926	Ntng2	-	.	-1	-1	.	.	0
chr6	131352936	131353142	Ybx3	-	.	-1	-1	.	.	0
chr1	135393576	135393746	Nav1	-	.	-1	-1	.	.	0
chr5	100536392	100536469	Sec31a	-	.	-1	-1	.	.	0
chr5	100536926	100536964	Sec31a	-	.	-1	-1	.	.	0
chr2	34571646	34571756	Gapvd1	-	chr2	34568060	34571648	VPS9	-	2
chr2	34589837	34589917	Gapvd1	-	.	-1	-1	.	.	0
chr5	72936763	72936828	Tec	-	chr5	72936795	72939461	SH3_9	-	33
chr5	72936763	72936828	Tec	-	chr5	72936807	72939464	SH3_1	-	21
chr7	46268119	46268181	Sergef	-	chr7	46264156	46268150	RCC1_2	-	31
chr5	144835956	144836021	Smurf1	-	.	-1	-1	.	.	0
chrX	151931447	151931530	Rragb	+	chrX	151931521	151941193	Arf	+	9
chrX	151931447	151931530	Rragb	+	chrX	151924390	151936151	Roc	+	83
chrX	151931447	151931530	Rragb	+	chrX	151924390	151946142	Gtr1_RagA	+	83
chr7	113630999	113631181	Spon1	+	chr7	113631025	113631172	TSP_1	+	147
chr5	97247404	97247538	Paqr3	-	chr5	97243863	97256180	HlyIII	-	134
chr5	97247404	97247601	Paqr3	-	chr5	97243863	97256180	HlyIII	-	197
chr19	5953758	5953799	Dpf2	-	.	-1	-1	.	.	0
chr14	60873816	60874094	Spata13	+	.	-1	-1	.	.	0
chr11	31868800	31868823	Cpeb4	+	.	-1	-1	.	.	0
chr2	30934893	30934907	Fnbp1	-	.	-1	-1	.	.	0
chr4	11248170	11248310	Ints8	-	.	-1	-1	.	.	0
chrX	59180738	59180854	Mcf2	-	chrX	59180762	59201015	CRAL_TRIO_2	-	92
chr1	183110777	183110845	Mia3	-	.	-1	-1	.	.	0
chr3	88065340	88065477	Mef2d	+	chr3	88065370	88066494	HJURP_C	+	107
chr3	88066842	88066898	Mef2d	+	.	-1	-1	.	.	0
chr10	90750554	90750628	Anks1b	+	.	-1	-1	.	.	0
chr10	90750554	90750628	Anks1b	+	.	-1	-1	.	.	0
chr10	90750557	90750628	Anks1b	+	.	-1	-1	.	.	0
chr2	122185955	122186095	Shf	-	.	-1	-1	.	.	0
chr14	38093233	38093304	Nrg3	-	.	-1	-1	.	.	0
chr3	9008610	9008636	Tpd52	-	chr3	9000072	9018788	TPD52	-	26
chr4	124809071	124809226	Epha10	+	chr4	124809100	124809468	SAM_2	+	126
chr4	124809071	124809226	Epha10	+	chr4	124809103	124809465	SAM_1	+	123
chr11	53271412	53271498	Aff4	+	chr11	53259496	53290463	AF-4	+	86
chrX	59338966	59339016	Atp11c	-	chrX	59335349	59349650	E1-E2_ATPase	-	50
chrY	1169122	1169256	Uty	-	.	-1	-1	.	.	0
chr1	153543570	153543698	Rgs8	+	.	-1	-1	.	.	0
chr2	76390529	76390603	Osbpl6	+	.	-1	-1	.	.	0
chrX	102540043	102540135	Jpx	+	.	-1	-1	.	.	0
chr12	111584751	111584816	Mark3	+	chr12	111559124	111594272	Pkinase	+	65
chr12	111584751	111584816	Mark3	+	chr12	111559130	111594260	PK_Tyr_Ser-Thr	+	65
chr1	133664353	133664388	Atp2b4	-	.	-1	-1	.	.	0
chr1	174894182	174894259	Rgs7	-	.	-1	-1	.	.	0
chr2	20810395	20810472	Etl4	+	.	-1	-1	.	.	0
chr1	9956271	9956366	Sgk3	+	chr1	9950578	9959229	PK_Tyr_Ser-Thr	+	95
chr1	9956271	9956366	Sgk3	+	chr1	9950578	9961612	Pkinase	+	95
chr1	84755144	84755209	Trip12	-	.	-1	-1	.	.	0
chr2	59907213	59907254	Baz2b	-	.	-1	-1	.	.	0
chr6	29412362	29412532	Ccdc136	+	.	-1	-1	.	.	0
chr1	97967963	97968037	B230216N24Rik	-	.	-1	-1	.	.	0
chr8	46194523	46194615	Sorbs2	+	.	-1	-1	.	.	0
chr8	46223582	46223626	Sorbs2	+	chr8	46216168	46223590	Sorb	+	8
chr1	132932391	132932429	Mdm4	-	.	-1	-1	.	.	0
chr16	30926345	30926449	Acap2	-	.	-1	-1	.	.	0
chr8	106572796	106572852	Cenpt	-	.	-1	-1	.	.	0
chr7	122774648	122774680	Tnrc6a	+	chr7	122772502	122776088	Ago_hook	+	32
chr9	21490694	21490804	Carm1	+	chr9	21486784	21494342	Methyltransf_9	+	110
chr9	21490694	21490804	Carm1	+	chr9	21486793	21494345	MTS	+	110
chr9	21490694	21490804	Carm1	+	chr9	21486796	21494339	PRMT5	+	110
chr9	21490694	21490804	Carm1	+	chr9	21486805	21491706	PrmA	+	110
chr9	21490694	21490804	Carm1	+	chr9	21490697	21494336	Methyltransf_25	+	107
chr9	21490694	21490804	Carm1	+	chr9	21490700	21494339	Methyltransf_11	+	104
chr2	91090212	91090271	Pacsin3	+	.	-1	-1	.	.	0
chr2	91090212	91090271	Pacsin3	+	.	-1	-1	.	.	0
chr2	97061881	97062096	Lrrc4c	+	.	-1	-1	.	.	0
chr8	13063914	13063997	Mcf2l	+	.	-1	-1	.	.	0
chr8	13063914	13064006	Mcf2l	+	.	-1	-1	.	.	0
chr1	51807808	51807894	Myo1b	-	.	-1	-1	.	.	0
chr2	119841223	119841285	Mapkbp1	+	chr2	119841266	119842446	WD40	+	19
chr16	27255117	27255161	Ccdc50	+	.	-1	-1	.	.	0
chr1	66724774	66724830	Unc80	+	chr1	66524943	66734752	UNC80	+	56
chr1	66724774	66724830	Unc80	+	chr1	66645807	66734752	UNC80	+	56
chr5	115689546	115689647	Pxn	+	.	-1	-1	.	.	0
chr2	130456808	130458661	Ubox5	-	chr2	130456956	130457169	FAST_1	-	213
chr2	130456808	130458661	Ubox5	-	chr2	130446544	130456923	FAST_2	-	115
chr2	142216150	142216227	Macrod2	+	.	-1	-1	.	.	0
chr2	180609394	180609606	Arfgap1	+	.	-1	-1	.	.	0
chr2	180620204	180620233	Arfgap1	+	.	-1	-1	.	.	0
chr1	97645166	97645285	Ppip5k2	-	.	-1	-1	.	.	0
chrX	72490533	72490742	Haus7	-	.	-1	-1	.	.	0
chr4	152461036	152461146	Chd5	+	.	-1	-1	.	.	0
chr4	152466791	152466868	Chd5	+	.	-1	-1	.	.	0
chr17	35365242	35365328	Bag6	+	.	-1	-1	.	.	0
chr6	118062197	118062445	Rasgef1a	+	chr6	118062416	118066069	RasGEF	+	29
chr6	118062224	118062445	Rasgef1a	+	chr6	118062416	118066069	RasGEF	+	29
chr1	119693607	119693651	Ptpn4	-	chr1	119671090	119700810	FERM_M	-	44
chr1	185082033	185082077	Bpnt1	+	chr1	185070345	185088802	Inositol_P	+	44
chr6	86400587	86400652	Tia1	+	chr6	86397316	86402003	RRM_1	+	65
chr11	119712486	119712569	Rptor	+	.	-1	-1	.	.	0
chr2	167146915	167147037	B4galt5	-	chr2	167143961	167147617	Glyco_transf_7C	-	122
chr19	6538813	6538839	Nrxn2	+	chr19	6531793	6540697	Laminin_G_2	+	26
chr19	6538813	6538839	Nrxn2	+	chr19	6531808	6540604	Laminin_G_1	+	26
chr3	35897719	35897844	Atp11b	+	.	-1	-1	.	.	0
chr4	136290748	136290759	Kdm1a	-	chr4	136278242	136299601	Amino_oxidase	-	11
chr4	136290748	136290759	Kdm1a	-	chr4	136286611	136299625	DAO	-	11
chr5	112376174	112376221	Miat	-	.	-1	-1	.	.	0
chr11	32358967	32359050	Sh3pxd2b	+	.	-1	-1	.	.	0
chr3	90087456	90087518	Nup210l	+	chr3	90087459	90088836	Big_2	+	59
chr3	90117660	90117764	Nup210l	+	.	-1	-1	.	.	0
chr3	90117660	90117764	Nup210l	+	.	-1	-1	.	.	0
chr1	87702534	87702590	Atg16l1	+	.	-1	-1	.	.	0
chr1	87702802	87702849	Atg16l1	+	.	-1	-1	.	.	0
chr1	87702802	87702849	Atg16l1	+	.	-1	-1	.	.	0
chr3	148533176	148533220	Adgrl2	-	chr3	148532030	148542173	7tm_2	-	44
chr15	73231874	73232185	Ptk2	-	.	-1	-1	.	.	0
chr6	83933675	83933743	Zfp638	+	.	-1	-1	.	.	0
chr7	28862283	28862417	Spred3	-	.	-1	-1	.	.	0
chrX	143138579	143138647	Alg13	+	.	-1	-1	.	.	0
chr7	44409123	44409317	Vrk3	+	.	-1	-1	.	.	0
chr7	45758176	45758289	Abcc8	-	chr7	45757850	45766722	ABC_membrane	-	113
chr7	49201344	49201796	Nav2	+	.	-1	-1	.	.	0
chr7	51513745	51513840	Gas2	+	.	-1	-1	.	.	0
chr9	47730031	47730114	Cadm1	+	.	-1	-1	.	.	0
chr7	79989298	79989459	Unc45a	-	chr7	79988672	79989436	TPR_16	-	138
chr7	79989298	79989459	Unc45a	-	chr7	79989343	79989418	TPR_7	-	75
chr7	79989298	79989459	Unc45a	-	chr7	79989361	79989430	TPR_8	-	69
chr7	92069839	92069880	Dlg2	+	.	-1	-1	.	.	0
chr7	111679378	111679437	Usp47	+	chr7	111658183	111681762	UCH_1	+	59
chr7	111679378	111679437	Usp47	+	chr7	111658183	111683091	UCH	+	59
chr7	101818569	101818709	Nup98	-	.	-1	-1	.	.	0
chr1	118463864	118463926	Clasp1	+	.	-1	-1	.	.	0
chr7	111933035	111933160	Mical2	+	.	-1	-1	.	.	0
chr7	122596818	122596919	Rbbp6	+	.	-1	-1	.	.	0
chr7	128060320	128060379	Tial1	-	chr7	128050111	128062850	RRM_1	-	59
chr13	91946941	91947009	Zcchc9	-	chr13	91946957	91947005	zf-CCHC_4	-	48
chr7	100895508	100895579	Fchsd2	+	.	-1	-1	.	.	0
chr2	53018728	53018853	Fmnl2	+	.	-1	-1	.	.	0
chr16	32186161	32186226	Ubxn7	+	.	-1	-1	.	.	0
chr8	45500686	45500745	Fat1	+	.	-1	-1	.	.	0
chr11	79889882	79889950	Suz12	+	.	-1	-1	.	.	0
chr8	48788623	48788808	Tenm3	-	chr8	48788645	48788699	hEGF	-	54
chr5	107957455	107957601	Evi5	-	.	-1	-1	.	.	0
chr8	69277703	69277780	Ints10	+	.	-1	-1	.	.	0
chr8	73241964	73242089	Slc35e1	-	chr8	73238507	73246346	TPT	-	125
chr8	73241964	73242089	Slc35e1	-	chr8	73238510	73243361	EamA	-	125
chr8	73243295	73243432	Slc35e1	-	chr8	73238507	73246346	TPT	-	137
chr8	73243295	73243432	Slc35e1	-	chr8	73238510	73243361	EamA	-	66
chr4	123335395	123335457	Macf1	-	.	-1	-1	.	.	0
chr12	4025335	4025466	Efr3b	-	.	-1	-1	.	.	0
chr12	4026714	4026875	Efr3b	-	.	-1	-1	.	.	0
chr5	81935282	81935410	Adgrl3	+	chr5	81914010	81942907	Latrophilin	+	128
chr5	81935282	81935410	Adgrl3	+	chr5	81919525	81942907	Latrophilin	+	128
chr8	96071916	96071999	Usb1	+	chr8	96060023	96073250	HVSL	+	83
chr8	107627477	107627566	Utp4	+	.	-1	-1	.	.	0
chr5	25571074	25571193	Kmt2c	-	.	-1	-1	.	.	0
chr8	124124721	124124879	Tcf25	+	chr8	124116447	124126048	Tcf25	+	158
chr8	124124721	124124879	Tcf25	+	chr8	124116447	124126048	Tcf25	+	158
chr7	143951977	143951997	Shank2	+	.	-1	-1	.	.	0
chr9	15224069	15224131	Taf1d	+	.	-1	-1	.	.	0
chr19	53232740	53232835	Add3	+	.	-1	-1	.	.	0
chr5	121673916	121674005	Mapkapk5	-	chr5	121672466	121676463	Kdo	-	89
chr5	121673916	121674005	Mapkapk5	-	chr5	121666989	121678602	Pkinase	-	89
chr5	121673916	121674005	Mapkapk5	-	chr5	121667013	121678608	PK_Tyr_Ser-Thr	-	89
chr9	20386206	20386328	Zfp426	-	chr9	20384402	20386326	KRAB	-	120
chr11	5937056	5937130	Camk2b	-	.	-1	-1	.	.	0
chr4	12169957	12169977	Cibar1	-	chr4	12157650	12171723	FAM92	-	20
chr9	36898463	36898567	Pknox2	-	.	-1	-1	.	.	0
chr13	102942658	102942666	Mast4	-	chr13	102919918	102947070	DUF1908	-	8
chr9	46115503	46115646	Sik3	+	.	-1	-1	.	.	0
chr9	50593836	50593925	Dixdc1	-	.	-1	-1	.	.	0
chr9	71776280	71776351	Tcf12	-	.	-1	-1	.	.	0
chr9	77124258	77124329	Mlip	-	chr9	77072046	77146931	MLIP	-	71
chr9	77136766	77138310	Mlip	-	chr9	77072046	77146931	MLIP	-	1544
chr9	82992840	82992926	Hmgn3	-	chr9	82992458	83028495	HMG14_17	-	86
chr6	83132051	83132221	Wdr54	-	.	-1	-1	.	.	0
chr9	89094586	89095308	Mthfs	+	chr9	89081806	89122109	5-FTHF_cyc-lig	+	722
chr10	98855139	98855225	Atp2b1	+	chr10	98854709	98858765	ATP_Ca_trans_C	+	86
chr9	98872967	98873023	Faim	+	.	-1	-1	.	.	0
chr9	108673853	108673981	Ip6k2	+	.	-1	-1	.	.	0
chr9	111173897	111173923	Trank1	+	.	-1	-1	.	.	0
chr4	43233903	43233908	Unc13b	+	.	-1	-1	.	.	0
chr10	13879944	13880018	Hivep2	+	.	-1	-1	.	.	0
chr10	18391776	18391907	Nhsl1	+	.	-1	-1	.	.	0
chr10	28430765	28430794	Ptprk	+	.	-1	-1	.	.	0
chr7	28594856	28594936	Actn4	-	chr7	28593991	28594934	EF-hand_8	-	78
chr7	28594856	28594936	Actn4	-	chr7	28593996	28595545	EF-hand_7	-	80
chr10	43271556	43271687	Pdss2	+	chr10	43174825	43271610	polyprenyl_synt	+	54
chr2	121051638	121051730	Trp53bp1	-	.	-1	-1	.	.	0
chr4	132949479	132949523	Cd164l2	+	chr4	132948824	132951563	MGC-24	+	44
chr10	79972523	79972576	Cbarp	-	.	-1	-1	.	.	0
chr1	154349602	154349658	Cacna1e	-	.	-1	-1	.	.	0
chrX	12555567	12555698	Med14	-	.	-1	-1	.	.	0
chr16	90743902	90743940	Synj1	-	.	-1	-1	.	.	0
chr5	84265419	84265484	Epha5	-	chr5	84254581	84290204	EphA2_TM	-	65
chr11	73077114	73077284	Ctns	-	chr11	73075875	73077168	PQ-loop	-	54
chr11	94330534	94330602	Cacna1g	-	.	-1	-1	.	.	0
chr9	41499097	41499456	Mir100hg	+	.	-1	-1	.	.	0
chr11	97901121	97901201	Cacnb1	-	chr11	97896062	97901169	Guanylate_kin	-	48
chr12	44630449	44630574	Nrcam	+	.	-1	-1	.	.	0
chr5	146229433	146229576	Cdk8	+	chr5	146168574	146229510	PK_Tyr_Ser-Thr	+	77
chr5	146229433	146229576	Cdk8	+	chr5	146168577	146235684	Pkinase	+	143
chr5	146229448	146229576	Cdk8	+	chr5	146168574	146229510	PK_Tyr_Ser-Thr	+	62
chr5	146229448	146229576	Cdk8	+	chr5	146168577	146235684	Pkinase	+	128
chr12	59223116	59223244	Mia2	+	.	-1	-1	.	.	0
chr12	59223116	59223244	Mia2	+	.	-1	-1	.	.	0
chr12	80217459	80217539	Actn1	-	chr12	80217498	80218529	EF-hand_5	-	41
chr12	116333790	116333846	Esyt2	+	chr12	116330619	116333800	C2	+	10
chr13	14233508	14233795	Ggps1	-	.	-1	-1	.	.	0
chr2	32187765	32187845	Golga2	+	.	-1	-1	.	.	0
chr13	106994006	106994032	Ipo11	-	.	-1	-1	.	.	0
chr14	7726974	7727348	Slc4a7	-	chr14	7712370	7731560	Band_3_cyto	-	374
chr14	7726974	7727348	Slc4a7	-	chr14	7712370	7731560	Band_3_cyto	-	374
chr14	7726980	7727348	Slc4a7	-	chr14	7712370	7731560	Band_3_cyto	-	368
chr14	7726980	7727348	Slc4a7	-	chr14	7712370	7731560	Band_3_cyto	-	368
chr14	20795859	20795927	Camk2g	-	.	-1	-1	.	.	0
chr14	20797886	20797918	Camk2g	-	.	-1	-1	.	.	0
chr14	26181058	26181108	Slmap	-	.	-1	-1	.	.	0
chr14	29770927	29771076	Cacna1d	-	chr14	29767204	29774514	CAC1F_C	-	149
chr14	29811252	29811335	Cacna1d	-	chr14	29797153	29818951	Ion_trans	-	83
chr14	29811252	29811335	Cacna1d	-	chr14	29797171	29817379	PKD_channel	-	83
chrX	132973163	132973222	Cstf2	+	.	-1	-1	.	.	0
chr18	42668149	42668211	Tcerg1	+	.	-1	-1	.	.	0
chr18	23630535	23630759	Dtna	+	.	-1	-1	.	.	0
chr18	23630538	23630759	Dtna	+	.	-1	-1	.	.	0
chr18	3299161	3299307	Crem	-	.	-1	-1	.	.	0
chr16	22077735	22078010	Tra2b	-	.	-1	-1	.	.	0
chr19	40328488	40328589	Sorbs1	-	.	-1	-1	.	.	0
chr15	76078165	76078200	Plec	-	chr15	76077420	76078998	CH	-	35
chr14	61881412	61881507	Dleu2	-	.	-1	-1	.	.	0
chr5	36000511	36000609	Ablim2	+	chr5	35985525	36014507	AbLIM_anchor	+	98
chr6	119942625	119942882	Wnk1	-	.	-1	-1	.	.	0
chr7	29572316	29572357	Zfp420	+	.	-1	-1	.	.	0
chr13	83773588	83773725	Mef2c	+	chr13	83773413	83781233	HJURP_C	+	137
chr13	49357404	49357463	Card19	-	.	-1	-1	.	.	0
chr12	70314007	70314036	Trim9	-	.	-1	-1	.	.	0
chr1	176596798	176597091	Cep170	-	.	-1	-1	.	.	0
chr12	61562586	61562636	Gm20063	-	.	-1	-1	.	.	0
chr2	49422055	49422246	Epc2	+	.	-1	-1	.	.	0
chr11	121112061	121112162	Hexdc	+	.	-1	-1	.	.	0
chr1	91036301	91036393	Lrrfip1	+	chr1	90996284	91050864	LRRFIP	+	92
chr1	91038076	91038168	Lrrfip1	+	chr1	90996284	91050864	LRRFIP	+	92
chr8	118397947	118398081	Sdr42e1	-	.	-1	-1	.	.	0
chr6	32870326	32870340	Chchd3	-	chr6	32829081	32985491	MIC19_MIC25	-	14
chr6	49229736	49230041	Tra2a	-	.	-1	-1	.	.	0
chr14	30778192	30778236	Pbrm1	+	.	-1	-1	.	.	0
chr6	29417930	29418151	Ccdc136	+	.	-1	-1	.	.	0
chr6	76879269	76879412	Ctnna2	-	chr6	76859652	77822511	Vinculin	-	143
chr6	55468211	55468294	Adcyap1r1	+	chr6	55455675	55472570	7tm_2	+	83
chr2	91512370	91512480	Atg13	-	.	-1	-1	.	.	0
chr2	121157332	121157394	Ppip5k1	-	.	-1	-1	.	.	0
chr2	156590251	156590322	Dlgap4	+	chr2	156588086	156604820	GKAP	+	71
chr2	121756041	121756208	Golm2	+	.	-1	-1	.	.	0
chr4	136309350	136309409	Kdm1a	-	.	-1	-1	.	.	0
chr9	4313701	4313805	Kbtbd3	+	.	-1	-1	.	.	0
chr15	93318164	93318370	Pphln1	+	.	-1	-1	.	.	0
chr3	65688791	65688868	Lekr1	+	.	-1	-1	.	.	0
chr2	157300762	157300779	Src	+	chr2	157300467	157304705	SH3_2	+	17
chr2	157300762	157300779	Src	+	chr2	157300470	157304690	SH3_1	+	17
chr2	157300762	157300779	Src	+	chr2	157300473	157304702	SH3_9	+	17
chr7	61767470	61767649	Gm9801	-	.	-1	-1	.	.	0
chr7	87765400	87765495	Grm5	+	.	-1	-1	.	.	0
chr19	4944288	4944446	Bbs1	-	.	-1	-1	.	.	0
chr18	36757561	36758319	Ankhd1	+	.	-1	-1	.	.	0
chr8	46924909	46925085	Acsl1	+	.	-1	-1	.	.	0
chr8	55098372	55098392	Wdr17	-	.	-1	-1	.	.	0
chr8	71789519	71789608	Myo9b	+	.	-1	-1	.	.	0
chr9	56988378	56988485	Sin3a	+	.	-1	-1	.	.	0
chr8	105150217	105150258	Dync1li2	-	chr8	105147228	105169346	DLIC	-	41
chr17	26307902	26307970	Decr2	-	chr17	26301230	26307940	adh_short_C2	-	38
chr17	26307902	26307970	Decr2	-	chr17	26302062	26307967	adh_short	-	65
chr17	26307902	26307970	Decr2	-	chr17	26302634	26307958	KR	-	56
chr5	136162158	136162298	Lrwd1	-	.	-1	-1	.	.	0
chr11	28342853	28342951	Ccdc85a	-	.	-1	-1	.	.	0
chr15	8254822	8254899	Cplane1	+	.	-1	-1	.	.	0
chr6	148092416	148092520	Ergic2	-	chr6	148083460	148096763	COPIIcoated_ERV	-	104
chr19	4986145	4986246	Peli3	-	chr19	4982328	4991825	Pellino	-	101
chr17	24030790	24031050	Srrm2	+	.	-1	-1	.	.	0
chr19	40298024	40298776	Sorbs1	-	.	-1	-1	.	.	0
chr14	59716492	59716632	Cab39l	+	.	-1	-1	.	.	0
chr14	47954330	47954416	Ktn1	+	.	-1	-1	.	.	0
chr5	123880841	123880918	Rsrc2	-	.	-1	-1	.	.	0
chr5	123883559	123883651	Rsrc2	-	.	-1	-1	.	.	0
chr1	53360654	53360725	Osgepl1	+	chr1	53354214	53360655	TsaD	+	1
chr12	109596454	109596624	Rian	+	.	-1	-1	.	.	0
chr12	8783272	8783508	Pum2	+	.	-1	-1	.	.	0
chr4	102778218	102778715	Sgip1	+	.	-1	-1	.	.	0
chr11	29447342	29447425	Ccdc88a	+	.	-1	-1	.	.	0
chr14	20347582	20347698	Nudt13	+	.	-1	-1	.	.	0
chr18	25155678	25156034	Fhod3	+	.	-1	-1	.	.	0
chr11	60766585	60766872	Tmem11	-	.	-1	-1	.	.	0
chr1	65263320	65263487	Pikfyve	+	.	-1	-1	.	.	0
chr3	65862550	65862696	Ccnl1	-	chr3	65858875	65865291	Cyclin_N	-	146
chr2	126494152	126494346	Gabpb1	-	chr2	126494155	126495537	Ank_4	-	191
chr2	126494152	126494346	Gabpb1	-	chr2	126494194	126495483	Ank_5	-	152
chr2	126494152	126494346	Gabpb1	-	chr2	126494224	126500467	Ank_2	-	122
chr2	126494152	126494346	Gabpb1	-	chr2	126494224	126494311	Ank	-	87
chr2	126494152	126494346	Gabpb1	-	chr2	126494230	126494311	Ank_3	-	81
chr2	126494152	126494346	Gabpb1	-	chr2	126494320	126495582	Ank_5	-	26
chr2	126494152	126494346	Gabpb1	-	chr2	126494320	126495537	Ank	-	26
chr2	126494152	126494346	Gabpb1	-	chr2	126494326	126495537	Ank_3	-	20
chrX	84188516	84188554	Dmd	+	.	-1	-1	.	.	0
chr3	97616797	97616949	Pde4dip	-	.	-1	-1	.	.	0
chr2	52626142	52626330	Stam2	-	chr2	52606463	52632097	VHS	-	188
chr2	131124511	131124687	Pank2	+	chr2	131115838	131138222	Fumble	+	176
chr6	120948711	120948800	Mical3	-	.	-1	-1	.	.	0
chr5	128858904	128859614	Rimbp2	-	.	-1	-1	.	.	0
chr5	8562260	8562406	Rundc3b	-	.	-1	-1	.	.	0
chr13	28689688	28689888	2610307P16Rik	-	.	-1	-1	.	.	0
chr3	103260882	103260932	Trim33	+	chr3	103255637	103261039	Bromodomain	+	50
chr3	106457814	106457990	Dram2	+	.	-1	-1	.	.	0
chr11	84745080	84745205	Ggnbp2	-	.	-1	-1	.	.	0
chr7	112441094	112441156	Tead1	+	chr7	112358737	112456019	TEA	+	62
chrX	67749466	67749528	Fmr1	+	.	-1	-1	.	.	0
chr7	128048762	128048830	Tial1	-	chr7	128047423	128049921	RRM_1	-	68
chr13	56979098	56979262	Trpc7	-	.	-1	-1	.	.	0
chr8	45502878	45502913	Fat1	+	.	-1	-1	.	.	0
chr8	14504400	14504525	Dlgap2	+	.	-1	-1	.	.	0
chr1	181008030	181008212	Wdr26	-	.	-1	-1	.	.	0
chr9	20397625	20397732	Zfp426	-	.	-1	-1	.	.	0
chr9	58791752	58791910	Neo1	-	chr9	58784559	58796442	Neogenin_C	-	158
chr9	77020255	77020329	Mlip	-	.	-1	-1	.	.	0
chr9	77136766	77138235	Mlip	-	chr9	77072046	77146931	MLIP	-	1469
chr9	108120087	108120221	Dag1	-	.	-1	-1	.	.	0
chr6	119690640	119690771	Erc1	-	chr6	119597349	119801556	Cast	-	131
chr10	28440090	28440101	Ptprk	+	.	-1	-1	.	.	0
chr10	116764093	116764188	Rab3ip	-	chr10	116754822	116764177	Sec2p	-	84
chr11	54651006	54651164	Cdc42se2	-	.	-1	-1	.	.	0
